# Supplementary material for: Slow Adaptive Response of Budding Yeast Cells to Stable Conditions of Continuous Culture Can Occur without Genome Modifications
Source: MDPI journal article supplement (doi:10.3390/genes11121419), 2020-11-27
Supplement: s1 [file s1]

## **Supplementary data**

**for**

# **Slow adaptive response of budding yeast cells to stable conditions of continuous culture can occur without genome modifications**

**Joanna Klim <sup>1</sup>, Urszula Zielenkiewicz <sup>2</sup>, Anna Kurlandzka <sup>3</sup>, Szymon Kaczanowski <sup>4</sup> and Marek Skoneczny <sup>5,\*</sup>**

## **Description of the microevolution study as the source of data described in this manuscript**

The data analyzed in this manuscript are derived from a larger microevolution study testing the hypothesis that compensatory evolutionary modifications, such as mutations and transcriptional changes, occur frequently in genes from perturbed modules of genetically interacting genes. The modules consist of functionally related genes encoding proteins that may form complexes and/or participate in common biochemical pathways. The deletions of two genes encoding evolutionarily conserved *Saccharomyces cerevisiae* proteins: Cog7p and Nup133p likely created perturbations in two such modules. In the laboratory microevolution experiments (carried out for more than 200 generations) we were following the accumulation of compensatory genome and transcriptome changes in yeast cell populations lacking the respective *COG7* or *NUP133* genes. Parental WT strain (W303 genetical background), subject to the same experimental conditions was used as a reference. Each strain was subjected to microevolution in three independent biological replicates. To accelerate evolution a separate set of continuous cultures was performed with *cog7Δ*, *nup133Δ* and a reference strain, all carrying an additional deletion of *MSH1* gene, which conferred the mutator phenotype.

When establishing continuous culture conditions for this study, our intention was to avoid any selection pressure, which would otherwise enforce the gradual accumulation and enrichment of adaptive mutations in the cultured cell populations and bias our results towards adaptation to that pressure. To this end, we did not apply nutrient limitation, which would cause starvation stress. The steadiness of population growth was assured by gauging the medium flow rate to the growth rate rather than enforcing the population doubling time by the flow rate of nutrient-limited growth medium, as is common in chemostat culture. A maintained density of  $5.3 \pm 0.3 \times 10^7$  cells per mL, equivalent to the late exponential phase of batch culture, assured constant, unperturbed growth of the cells. Moreover, the selection of synthetic minimal medium with glycerol as a respiratory carbon source increased the demand for the cells' metabolic capacity, hence maximizing the number of genes that were expressed in them.

The evolved yeast cell populations were characterized through whole genome sequencing and whole transcriptome analyses. Numerous mutations in the genomes and numerous changes in the transcriptome were identified, especially in cell populations lacking *MSH1* gene. The extensive analysis of these data is a subject of another manuscript.

## **Results of microevolution experiment for the wild-type reference strain**

As one could expect the wild-type, reference W303 cell populations accumulated the fewest significant mutations, i.e. leading to modification of proteins. The list of them is given below:

### **Replicate 1 (Rep-1)**

Short deletion in *HOG1* gene leading to frameshift. Mutated gene encoded truncated 243 aa protein, most likely inactive.

A mutation in *MSY1* gene leading to conservative Leu287→Phe substitution in the encoded protein.

### **Replicate 2 (Rep-2)**

A point mutation in *HOG1* gene leading to Glu186→Lys substitution in the encoded protein.

A point mutation in *URE2* gene leading to Gln209→STOP and truncation of Ure2p.

### **Replicate 3 (Rep-3)**

A mutation in *MSY1* gene leading to conservative Leu287→Phe substitution in the encoded protein.

*HOG1* gene encodes mitogen-activated protein kinase involved in osmoregulation, *URE2* gene encodes nitrogen catabolite repression transcriptional regulator and *MSY1* gene encodes mitochondrial tyrosyl-tRNA synthetase.

The presence of these mutations, especially in *HOG1* and *URE2* genes encoding proteins involved in cellular signaling and regulation of cellular processes indicates that WT W303 strain was subject to some evolutionary drift as well. In fact, the mutations inactivating regulatory proteins were previously reported and the loss of signaling networks was suggested as an adaptation to continuous culture conditions in other microevolution studies [1]. Since there were no genes that were mutated in all biological replicates one could expect the differences in the expression of genes between individual biological replicates; indeed such differences were present. When comparing Log<sub>2</sub>Ratio data for genes that responded differently to continuous culture conditions in three biological replicates (see Table S3) we noticed that Rep-1 was the one that diverged the most from the remaining two biological replicates. The difference between the data for Rep-1 and the average of Rep-2 and Rep-3 biological replicates was above 0.9 or below -0.9 for 416 genes. The differences between Rep-2 vs the average of Rep-1 and Rep-3 and between Rep-3 vs the average of Rep-1 and Rep-2 were above 0.9 or below -0.9 for 79 and 171 genes, respectively. Much weaker presumable effect of *HOG1* mutation in Rep-2 may be explained by the fact that the *HOG1* mutation in Rep-1 was a short deletion with frameshift leading to truncated Hog1p and its inactivation, whereas in Rep-2 there was a point mutation in *HOG1*, likely with the minor effect on the function of encoded protein and the expression of controlled genes. Regarding *MSY1* and *URE2* we cannot distinguish the effect of mutations in these genes, because the mutation in *URE2* was detected in Rep-2 cell population, whereas the mutation in *MSY1* was detected in Rep-1 and Rep-3 cell populations. In *MSY1* gene we detected a point mutation leading to conservative Leu→Phe substitution whereas in *URE2* we identified much more significant mutation, a STOP introduced after 208 codon

leading to truncation and probable inactivation of encoded protein. Both these mutations, as revealed by calculating the difference in the Log<sub>2</sub>Ratio between the data for Rep-2 and the average of the other two biological replicates, affected the expression of 79 genes. The difference between the data for Rep-3 and the average of Rep-1 and Rep-2 observed for 171 genes probably reflects the combined effect of mutations in *HOG1* and *URE2* genes.

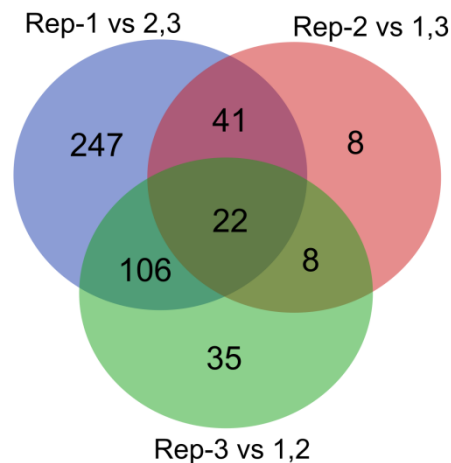

Figure S1. Venn diagram showing the number of genes whose expression under continuous culture conditions was commonly or differently affected by mutations in *MSY1*, *HOG1* and *URE2* genes. See Table S3 for more information on individual genes.

As demonstrated by the Venn diagram in Figure S1 these gene sets are overlapping, which is not surprising because in all three biological replicates the effects of single or combined inactivation of *MSY1*, *HOG1* and *URE2* genes were exposed. The total number of genes that met at least one of the criteria mentioned above was 467.

One could treat these calculations with reluctance, arguing that they are based on single biological replicates, therefore are not statistically significant and could be the result of experimental imperfections rather than mutations found in the genomes of cell populations. However, and this is the phenomenon we describe and analyze in the main text of this paper, there were more than four hundred genes whose change in expression between 40<sup>th</sup> and 240<sup>th</sup> generations was uniform in all biological replicates. This result proves the integrity of transcriptome data and ensures that the differences observed between the biological replicates for some genes are genuine and reflect the possible consequence of Hog1p or Ure2p inactivation.

## Reference

1. Kvitek, D.J.; Sherlock, G. Whole genome, whole population sequencing reveals that loss of signaling networks is the major adaptive strategy in a constant environment. *PLoS Genet.* **2013**, 9, e1003972, doi:10.1371/journal.pgen.1003972.

**Table S1** Primers used for verification of the transcriptome data with qRT-PCR

| Primer name         | Targeted PCR product    | Primer sequence (5'→3') |
|---------------------|-------------------------|-------------------------|
| ACT1F               | <i>ACT1</i> (reference) | AGAGTTGCCCCAGAAGAACA    |
| ACT1R               |                         | GGCTTGGATGGAAACGTAGA    |
| L_YLR413W_1150-1449 | <i>INA1</i>             | TGACAACTATCACACCAGAACA  |
| R_YLR413W_1150-1449 |                         | TTGTTCTGTTTAAGTGAGCACG  |
| L_YJR004C_350-649   | <i>SAG1</i>             | GATGTGGTGAATTTTCGATCCTG |
| R_YJR004C_350-649   |                         | TCAATCTTCTCAGTACCACCC   |
| L_YKR026C_0-299     | <i>GCN3</i>             | ATACTGAGATGACAATGCCGAT  |
| R_YKR026C_0-299     |                         | GAAAATATCACAACCGGCTCTC  |
| L_YHR196W_50-349    | <i>UTP9</i>             | CTTTGGGTGGTGTAGTGATTTG  |
| R_YHR196W_50-349    |                         | AAACAACAATTCTTCCGTCAGG  |
| L_YOL104C_400-699   | <i>NDJ1</i>             | CCGTTTTAACAAAATTTGGCCC  |
| R_YOL104C_400-699   |                         | CATTCGGAATGTTCTGATGGAC  |
| L_YER126C_400-699   | <i>NSA2</i>             | CACTCATCCGGAATTAGGTGTA  |
| R_YER126C_400-699   |                         | CCCAATTCCGAAACGTTAACTT  |
| L_YHR065C_600-899   | <i>RRP3</i>             | GACATGGAATTTGGACCTGTTC  |
| R_YHR065C_600-899   |                         | ACAGGATTTGTCAAACCTTGCTC |
| L_YHR088W_50-349    | <i>RPF1</i>             | CACTAGAGTGTACGATGAGACC  |
| R_YHR088W_50-349    |                         | TTTGGTGGCTCATTAGAATTGC  |

**Figure S2** Correlation between the transcriptome and qRT-PCR data. The calculated correlation coefficient was 0.931. See Table S1 above for the list of genes selected for this experiment.

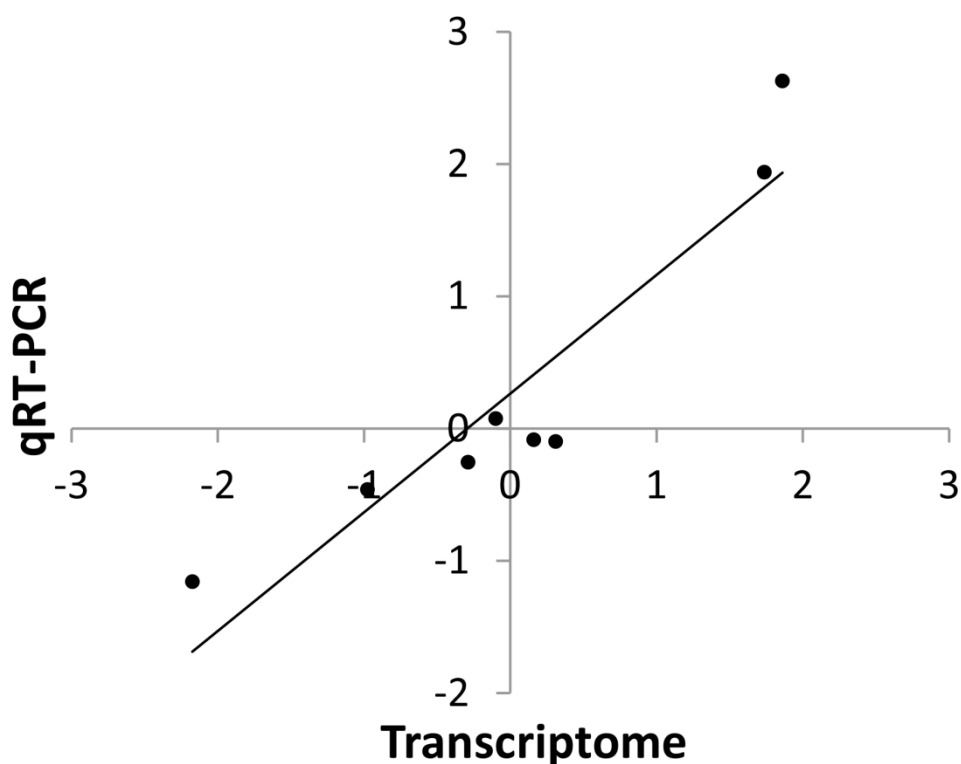

**Figure S3** All upregulated and downregulated genes selected in the course of transcriptome analysis sorted according to functional category assigned to them. For clarity, the number of GO terms, shown in Figure 1, was reduced by merging the lists of genes of similar functions. Sorting was done manually on the basis of GO annotations assigned to genes and the description of their function in Saccharomyces Genome Database (SGD). Below the gray bar are genes whose functions were not overrepresented within the gene-sets. Leftmost column shows the Log2Ratio of change in gene expression between 40th and 240th generation of growth in continuous culture. Rightmost column displays short description of gene function taken from SGD.

## Up-regulated genes

| Log2Ratio         | ORF     | Gene  | Description                                       | Log2Ratio |  |
|-------------------|---------|-------|---------------------------------------------------|-----------|--|
| <b>Peroxisome</b> |         |       |                                                   |           |  |
| 1.144             | YDR256C | CTA1  | Catalase A                                        | -4        |  |
| 1.999             | YIR031C | DAL7  | Malate synthase                                   | -3        |  |
| 1.170             | YLR284C | ECI1  | Peroxisomal delta3,delta2-enoyl-CoA isomerase     | -2        |  |
| 1.215             | YER015W | FAA2  | Medium chain fatty acyl-CoA synthetase            | -1        |  |
| 1.709             | YKR009C | FOX2  | 3-OH-acyl-CoA dehydrogenase / enoyl-CoA hydratase | 0         |  |
| 1.388             | YNL009W | IDP3  | Peroxisomal isocitrate dehydrogenase              | 1         |  |
| 1.379             | YOR084W | LPX1  | Peroxisomal matrix-localized lipase               | 2         |  |
| 2.207             | YGL205W | POX1  | Fatty-acyl coenzyme A oxidase                     | 3         |  |
| 1.045             | YNL202W | SPS19 | Peroxisomal 2,4-dienoyl-CoA reductase             | 4         |  |

## Catabolism of small molecules, including aminoacids

|       |         |        |                                                      |
|-------|---------|--------|------------------------------------------------------|
| 1.904 | YMR303C | ADH2   | Glucose-repressible alcohol dehydrogenase II         |
| 0.914 | YMR170C | ALD2   | Cytoplasmic aldehyde dehydrogenase                   |
| 1.878 | YLR155C | ASP3-1 | Cell-wall L-asparaginase II - asparagine catabolism  |
| 1.859 | YLR157C | ASP3-2 | Cell-wall L-asparaginase II - asparagine catabolism  |
| 1.894 | YLR158C | ASP3-3 | Cell-wall L-asparaginase II - asparagine catabolism  |
| 1.867 | YLR160C | ASP3-4 | Cell-wall L-asparaginase II - asparagine catabolism  |
| 1.528 | YJR148W | BAT2   | Cytosolic branched-chain amino acid aminotransferase |
| 0.942 | YOR125C | CAT5   | Protein required for ubiquinone (CoQ) biosynthesis   |
| 2.357 | YLR307W | CDA1   | Chitin deacetylase                                   |
| 1.320 | Q0250   | COX2   | Subunit II of cytochrome c oxidase (Complex IV)      |
| 2.932 | YIR027C | DAL1   | Allantoinase                                         |
| 3.249 | YIR028W | DAL4   | Allantoin permease                                   |
| 4.073 | YJR152W | DAL5   | Allantoate permease                                  |
| 2.403 | YHL016C | DUR3   | Plasma membrane urea and polyamines transporter      |
| 0.976 | YML080W | DUS1   | Dihydrouridine synthase                              |
| 1.157 | YOR384W | FRE5   | Putative ferric reductase with similarity to Fre2p   |
| 1.171 | YDL215C | GDH2   | NAD(+)-dependent glutamate dehydrogenase             |
| 1.147 | YBR248C | HIS7   | Imidazole glycerol phosphate synthase                |
| 1.431 | YEL066W | HPA3   | D-Amino acid N-acetyltransferase                     |
| 0.955 | YNL239W | LAP3   | Cysteine aminopeptidase                              |
| 1.134 | YCL018W | LEU2   | Beta-isopropylmalate dehydrogenase (IMDH)            |
| 1.349 | YBR213W | MET8   | Bifunctional dehydrogenase and ferrochelatase        |
| 1.829 | YPL171C | OYE3   | Conserved NADPH oxidoreductase                       |
| 1.152 | YER023W | PRO3   | Delta 1-pyrroline-5-carboxylate reductase            |
| 1.440 | YKL132C | RMA1   | Putative dihydrofolate synthetase                    |
| 0.995 | YIL167W | SDL1   | Blocked reading frame encoding L-serine dehydratase  |
| 1.338 | YAL067C | SEO1   | Putative permease                                    |
| 1.132 | YPR069C | SPE3   | Spermidine synthase                                  |
| 1.302 | YJR103W | URA8   | Minor CTP synthase isozyme (see also URA7)           |

## Mitochondrion

|       |         |         |                                                      |
|-------|---------|---------|------------------------------------------------------|
| 1.105 | YOR374W | ALD4    | Mitochondrial aldehyde dehydrogenase                 |
| 2.117 | YER073W | ALD5    | Mitochondrial aldehyde dehydrogenase                 |
| 1.120 | YNL315C | ATP11   | Molecular chaperone                                  |
| 1.387 | YIL098C | FMC1    | Mitochondrial matrix protein                         |
| 1.214 | YPR006C | ICL2    | 2-methylisocitrate lyase of the mitochondrial matrix |
| 0.930 | YCR071C | IMG2    | Mitochondrial ribosomal protein of the large subunit |
| 0.953 | YIL070C | MAM33   | Translational activator for mitochondrial COX1 mRNA  |
| 0.984 | YDR296W | MHR1    | Mitochondrial ribosomal protein of the large subunit |
| 1.196 | YGR084C | MRP13   | Mitochondrial ribosomal protein of the small subunit |
| 1.149 | YOR150W | MRPL23  | Mitochondrial ribosomal protein of the large subunit |
| 1.040 | YMR024W | MRPL3   | Mitochondrial ribosomal protein of the large subunit |
| 0.968 | YKL138C | MRPL31  | Mitochondrial ribosomal protein of the large subunit |
| 1.422 | YMR225C | MRPL44  | Mitochondrial ribosomal protein of the large subunit |
| 1.016 | YMR228W | MTF1    | Mitochondrial RNA polymerase specificity factor      |
| 2.409 | YLR142W | PUT1    | Proline oxidase                                      |
| 0.938 | YNL122C | YNL122C | Mitochondrial ribosomal protein of the large subunit |

## Sister chromatid segregation

|       |         |      |                                                        |
|-------|---------|------|--------------------------------------------------------|
| 1.335 | YMR198W | CIK1 | Kinesin-associated protein                             |
| 1.137 | YMR048W | CSM3 | Replication fork associated factor                     |
| 1.202 | YPL209C | IPL1 | Aurora kinase of chromosomal passenger complex         |
| 1.019 | YIL026C | IRR1 | Subunit of the cohesin complex                         |
| 1.351 | YDL003W | MCD1 | Essential alpha-kleisin subunit of the cohesin complex |
| 1.317 | YDR113C | PDS1 | Securin                                                |
| 1.015 | YOR073W | SGO1 | Component of the spindle checkpoint                    |
| 0.944 | YFL008W | SMC1 | Subunit of the multiprotein cohesin complex            |
| 1.097 | YJL074C | SMC3 | Subunit of the multiprotein cohesin complex            |
| 1.151 | YLR212C | TUB4 | Gamma-tubulin                                          |

## Purine nucleotide salvage

|       |         |      |                                                |
|-------|---------|------|------------------------------------------------|
| 1.551 | YDR399W | HPT1 | Hypoxanthine-guanine phosphoribosyltransferase |
| 1.539 | YJR133W | XPT1 | Xanthine-guanine phosphoribosyl transferase    |

## Signal transduction

|       |         |      |                                                                       |
|-------|---------|------|-----------------------------------------------------------------------|
| 0.967 | YDR277C | MTH1 | Negative regulator of the glucose-sensing signal transduction pathway |
| 2.691 | YOL128C | YGK3 | Protein kinase related to mammalian GSK-3 glycogen synthase kinases   |

## Response to toxin

|       |         |      |                                               |
|-------|---------|------|-----------------------------------------------|
| 1.729 | YFL061W | DDI2 | Cyanamide hydratase that detoxifies cyanamide |
| 1.713 | YNL335W | DDI3 | Cyanamide hydratase that detoxifies cyanamide |

## Cell division

|       |         |       |                                                                       |
|-------|---------|-------|-----------------------------------------------------------------------|
| 1.113 | YLR353W | BUD8  | Protein involved in bud-site selection                                |
| 0.950 | YHR107C | CDC12 | Component of the septin ring that is required for cytokinesis         |
| 1.075 | YDL161W | ENT1  | Epsin-like protein involved in endocytosis and actin patch assembly   |
| 1.012 | YER032W | FIR1  | Protein involved in 3' mRNA processing                                |
| 1.202 | YDR507C | GIN4  | Protein kinase involved in bud growth and assembly of the septin ring |
| 1.033 | YOR181W | LAS17 | Actin assembly factor                                                 |
| 1.375 | YLR313C | SPH1  | Protein involved in shmoo formation and bipolar bud site selection    |
| 1.458 | YGR221C | TOS2  | Protein involved in localization of Cdc24p to the site of bud growth  |
| 1.079 | YML109W | ZDS2  | Protein with a role in regulating Swe1p-dependent polarized growth    |

## Metabolism

|       |         |       |                                                    |
|-------|---------|-------|----------------------------------------------------|
| 1.510 | YOR074C | CDC21 | Thymidylate synthase                               |
| 1.776 | YNL129W | NRK1  | Nicotinamide riboside kinase                       |
| 1.195 | YOR143C | THI80 | Thiamine pyrophosphokinase                         |
| 1.204 | YPL201C | YIG1  | Protein that interacts with glycerol 3-phosphatase |

## Protein modification

|       |         |      |                                                                        |
|-------|---------|------|------------------------------------------------------------------------|
| 1.613 | YPR051W | MAK3 | Catalytic subunit of the NatC type N-terminal acetyltransferase (NAT)  |
| 0.919 | YOR281C | PLP2 | Protein that interacts with the CCT complex to stimulate actin folding |
| 1.015 | YJR099W | YUH1 | Ubiquitin C-terminal hydrolase                                         |

## Endomembrane system

|       |           |       |                                                                       |
|-------|-----------|-------|-----------------------------------------------------------------------|
| 1.270 | YGR142W   | BTN2  | v-SNARE binding protein                                               |
| 0.963 | YLR246W   | ERF2  | Subunit of a palmitoyltransferase                                     |
| 1.337 | YML008C   | ERG6  | Delta(24)-sterol C-methyltransferase                                  |
| 0.999 | YML104C   | MDM1  | PtdIns-3-P binding protein that tethers the ER to vacuoles at NVJs    |
| 0.954 | YHL023C   | NPR3  | Subunit of the Iml1p/SEACIT complex                                   |
| 6.586 | YPR194C   | OPT2  | Oligopeptide transporter                                              |
| 1.160 | YGL226C-A | OST5  | Zeta subunit of the oligosaccharyltransferase complex of the ER lumen |
| 1.012 | YOR216C   | RUD3  | Golgi matrix protein                                                  |
| 0.941 | YJL145W   | SFH5  | Non-classical phosphatidylinositol transfer protein (PITP)            |
| 0.900 | YBR264C   | YPT10 | Rab family GTP-binding protein                                        |
| 1.191 | YER031C   | YPT31 | Rab family GTPase                                                     |
| 1.057 | YOR003W   | YSP3  | Putative precursor of the subtilisin-like protease III                |

## Extracellular region

|       |         |            |                                                    |
|-------|---------|------------|----------------------------------------------------|
| 3.158 | YGL089C | MF(ALPHA)2 | Mating pheromone alpha-factor, made by alpha cells |
| 2.049 | YJR153W | PGU1       | Endo-polygalacturonase                             |

## Mitochondrial metabolism

|       |           |       |                                                                   |
|-------|-----------|-------|-------------------------------------------------------------------|
| 1.181 | YBR085W   | AAC3  | Mitochondrial inner membrane ADP/ATP translocator                 |
| 2.307 | YNR020C   | ATP23 | Putative metalloprotease of the mitochondrial inner membrane      |
| 0.938 | YOL096C   | COQ3  | O-methyltransferase                                               |
| 1.237 | YLL009C   | COX17 | Copper metallochaperone that transfers copper to Sco1p and Cox11p |
| 1.000 | YHR116W   | COX23 | Protein that functions in mitochondrial copper homeostasis        |
| 1.056 | YLR348C   | DIC1  | Mitochondrial dicarboxylate carrier                               |
| 0.996 | YIL134W   | FLX1  | Mitochondrial flavin adenine dinucleotide transporter             |
| 0.979 | YOL023W   | IFM1  | Mitochondrial translation initiation factor 2                     |
| 1.256 | YKL120W   | OAC1  | Mitochondrial inner membrane transporter                          |
| 0.993 | YML030W   | RCF1  | Cytochrome c oxidase subunit                                      |
| 1.229 | YAR008W   | SEN34 | Subunit of the tRNA splicing endonuclease                         |
| 1.073 | YJR135W-A | TIM8  | Mitochondrial intermembrane space protein                         |
| 1.419 | YBR104W   | YMC2  | Putative mitochondrial inner membrane transporter                 |

## Chromatin-associated

|       |         |         |                                                                       |
|-------|---------|---------|-----------------------------------------------------------------------|
| 0.995 | YIR010W | DSN1    | Essential component of the MIND kinetochore complex                   |
| 1.106 | YNL164C | IBD2    | Component of the BUB2-dependent spindle checkpoint pathway            |
| 1.018 | YKL089W | MIF2    | Protein required for structural integrity of elongating spindles      |
| 1.058 | YPR018W | RLF2    | Largest subunit (p90) of the Chromatin Assembly Complex (CAF-1)       |
| 0.955 | YFR037C | RSC8    | Component of the RSC chromatin remodeling complex                     |
| 1.012 | YHR207C | SET5    | Methyltransferase involved in methylation of histone H4 Lys5, -8, -12 |
| 1.077 | YHR127W | YHR127W | Protein of unknown function                                           |



## DNA repair

|       |         |       |                                             |
|-------|---------|-------|---------------------------------------------|
| 0.900 | YGL090W | LIF1  | Component of the DNA ligase IV complex      |
| 1.075 | YML060W | OGG1  | Nuclear and mitochondrial glycosylase/lyase |
| 1.159 | YJR043C | POL32 | Third subunit of DNA polymerase delta       |
| 1.012 | YKL113C | RAD27 | 5' to 3' exonuclease, 5' flap endonuclease  |

## Transcription factors

|       |         |         |                                                                       |
|-------|---------|---------|-----------------------------------------------------------------------|
| 1.594 | YKR034W | DAL80   | Negative regulator of genes in multiple nitrogen degradation pathways |
| 0.996 | YIL131C | FKH1    | Forkhead family transcription factor                                  |
| 1.341 | YMR136W | GAT2    | Protein containing GATA family zinc finger motifs                     |
| 1.559 | YDR123C | INO2    | Transcription factor                                                  |
| 3.152 | YGL209W | MIG2    | Zinc finger transcriptional repressor                                 |
| 1.164 | YER028C | MIG3    | Transcriptional regulator                                             |
| 1.591 | YNL289W | PCL1    | Cyclin, interacts with cyclin-dependent kinase Pho85p                 |
| 1.856 | YOR315W | SFG1    | Nuclear protein putative transcription factor                         |
| 0.966 | YPR009W | SUT2    | Zn2Cys6 family transcription factor                                   |
| 1.077 | YBR083W | TEC1    | Transcription factor targeting filamentation genes and Ty1 expression |
| 1.324 | YLR183C | TOS4    | Putative transcription factor, contains Forkhead Associated domain    |
| 1.343 | YDR451C | YHP1    | Homeobox transcriptional repressor                                    |
| 1.329 | YHR177W | YHR177W | Putative transcription factor containing a WOPR domain                |

## RNA metabolism

|       |         |         |                                                                      |
|-------|---------|---------|----------------------------------------------------------------------|
| 1.027 | YGR246C | BRF1    | TFIIB B-related factor                                               |
| 0.972 | YKL139W | CTK1    | Catalytic (alpha) subunit of C-terminal domain kinase I (CTDK-I)     |
| 1.034 | YHR169W | DBP8    | ATPase, putative RNA helicase of the DEAD-box family                 |
| 1.203 | YHR085W | IP11    | Component of the Rix1 complex and possibly pre-replicative complexes |
| 1.229 | YOR274W | MOD5    | Delta 2-isopentenyl pyrophosphate:tRNA isopentenyl transferase       |
| 0.933 | YDR243C | PRP28   | RNA binding protein                                                  |
| 0.940 | YPL208W | RKM1    | SET-domain lysine-N-methyltransferase                                |
| 1.136 | YML043C | RRN11   | Component of the core factor (CF) rDNA transcription factor complex  |
| 1.629 | YIL082W | YIL082W | Retrotransposon TYA Gag gene co-transcribed with TYB Pol             |

## Plasma membrane transport and signaling

|       |         |       |                                                                  |
|-------|---------|-------|------------------------------------------------------------------|
| 1.136 | YML006C | GIS4  | CAAX box containing protein of unknown function                  |
| 0.971 | YNR072W | HXT17 | Putative transmembrane polyol transporter                        |
| 1.241 | YDR343C | HXT6  | High-affinity glucose transporter                                |
| 1.262 | YIL120W | QDR1  | Multidrug transporter of the major facilitator superfamily       |
| 1.063 | YBR043C | QDR3  | Multidrug transporter of the major facilitator superfamily       |
| 0.967 | YER118C | SHO1  | Transmembrane osmosensor for filamentous growth and HOG pathways |

## Unknown function

|       |         |       |                                                                     |
|-------|---------|-------|---------------------------------------------------------------------|
| 1.462 | YMR003W | AIM34 | Protein of unknown function                                         |
| 1.888 | YNL269W | BSC4  | Protein of unknown function                                         |
| 1.721 | YIR030C | DCG1  | Protein of unknown function                                         |
| 1.090 | YOR271C | FSF1  | Putative protein                                                    |
| 1.447 | YOL056W | GPM3  | Homolog of Gpm1p phosphoglycerate mutase                            |
| 1.085 | YNL215W | IES2  | Protein that associates with the INO80 chromatin remodeling complex |
| 1.202 | YDR316W | OMS1  | Protein integral to the mitochondrial membrane                      |
| 1.008 | YLR338W | OPI9  | Dubious open reading frame                                          |
| 1.458 | YDR281C | PHM6  | Protein of unknown function                                         |
| 1.720 | Q0010   | Q0010 | Dubious open reading frame                                          |
| 1.364 | Q0182   | Q0182 | Dubious open reading frame                                          |
| 1.162 | Q0297   | Q0297 | Dubious open reading frame                                          |
| 1.289 | YDL048C | STP4  | Protein containing a Kruppel-type zinc-finger domain                |

|       |           |           |                                                    |
|-------|-----------|-----------|----------------------------------------------------|
| 1.589 | YPR157W   | TDA6      | Putative protein of unknown function               |
| 1.735 | YAR061W   | YAR061W   | Pseudogenic fragment with similarity to flocculins |
| 0.916 | YBL010C   | YBL010C   | Putative protein of unknown function               |
| 2.121 | YBL065W   | YBL065W   | Dubious open reading frame                         |
| 1.045 | YBL107W-A | YBL107W-A | Dubious open reading frame                         |
| 1.006 | YBR206W   | YBR206W   | Dubious open reading frame                         |
| 2.105 | YCL021W-A | YCL021W-A | Putative protein of unknown function               |
| 1.657 | YDL114W   | YDL114W   | Putative short-chain dehydrogenase/reductase       |
| 1.772 | YDL211C   | YDL211C   | Protein of unknown function                        |
| 1.676 | YEL076C   | YEL076C   | Putative protein of unknown function               |
| 1.808 | YEL076C-A | YEL076C-A | Putative protein of unknown function               |
| 1.142 | YER138W-A | YER138W-A | Putative protein of unknown function               |
| 1.173 | YFL064C   | YFL064C   | Putative protein of unknown function               |
| 1.419 | YFL065C   | YFL065C   | Putative protein of unknown function               |
| 1.465 | YFL067W   | YFL067W   | Protein of unknown function                        |
| 0.937 | YFL068W   | YFL068W   | Putative protein of unknown function               |
| 1.247 | YGL242C   | YGL242C   | Protein of unknown function                        |
| 1.055 | YGR021W   | YGR021W   | Putative protein of unknown function               |
| 2.545 | YGR190C   | YGR190C   | Dubious open reading frame                         |
| 1.143 | YHL026C   | YHL026C   | Putative protein of unknown function               |
| 1.413 | YHL049C   | YHL049C   | Putative protein of unknown function               |
| 1.584 | YHR213W   | YHR213W   | Pseudogenic fragment with similarity to flocculins |
| 1.041 | YHR214W-A | YHR214W-A | Dubious open reading frame                         |
| 1.361 | YHR217C   | YHR217C   | Dubious open reading frame                         |
| 1.479 | YIL174W   | YIL174W   | Hypothetical protein                               |
| 1.619 | YIR040C   | YIR040C   | Dubious open reading frame                         |
| 0.970 | YJL055W   | YJL055W   | Putative protein of unknown function               |
| 1.217 | YJR011C   | YJR011C   | Putative protein of unknown function               |
| 1.246 | YKR075C   | YKR075C   | Protein of unknown function                        |
| 1.117 | YLR257W   | YLR257W   | Protein of unknown function                        |
| 1.051 | YLR379W   | YLR379W   | Dubious open reading frame                         |
| 1.892 | YLR464W   | YLR464W   | Putative protein of unknown function               |
| 1.107 | YML034C-A | YML034C-A | Dubious open reading frame                         |
| 1.688 | YML122C   | YML122C   | Putative protein of unknown function               |
| 1.334 | YMR007W   | YMR007W   | Putative protein of unknown function               |
| 1.030 | YMR082C   | YMR082C   | Putative protein of unknown function               |
| 1.167 | YMR193C-A | YMR193C-A | Dubious open reading frame                         |
| 0.907 | YNL043C   | YNL043C   | Dubious open reading frame                         |
| 1.134 | YNR029C   | YNR029C   | Putative protein of unknown function               |
| 1.054 | YOR200W   | YOR200W   | Dubious open reading frame                         |
| 1.101 | YOR263C   | YOR263C   | Dubious open reading frame                         |
| 1.168 | YOR331C   | YOR331C   | Dubious open reading frame                         |
| 1.175 | YOR389W   | YOR389W   | Putative protein of unknown function               |
| 1.239 | YPL277C   | YPL277C   | Putative protein of unknown function               |
| 1.233 | YPL278C   | YPL278C   | Putative protein of unknown function               |
| 1.488 | YPR203W   | YPR203W   | Putative protein of unknown function               |
| 1.316 | YOL154W   | ZPS1      | Putative GPI-anchored protein                      |

## Down-regulated genes

| LogRatio                      | ORF       | Gene   | Description                                                |
|-------------------------------|-----------|--------|------------------------------------------------------------|
| <b>Cell wall organization</b> |           |        |                                                            |
| -1.234                        | YLR110C   | CCW12  | Cell wall mannoprotein                                     |
| -0.945                        | YLR390W-A | CCW14  | Covalently linked cell wall glycoprotein                   |
| -1.894                        | YKL096W   | CWP1   | Cell wall mannoprotein that localizes to birth scars       |
| -0.988                        | YBL043W   | ECM13  | Non-essential protein of unknown function                  |
| -1.247                        | YBL101C   | ECM21  | Regulation of endocytosis of plasma membrane proteins      |
| -0.969                        | YMR176W   | ECM5   | Subunit of the Snt2C complex                               |
| -1.122                        | YPL221W   | FLC1   | Flavin adenine dinucleotide transporter                    |
| -1.412                        | YJL159W   | HSP150 | O-mannosylated heat shock protein                          |
| -1.161                        | YPR159W   | KRE6   | Type II integral membrane protein                          |
| -0.904                        | YDL146W   | LDB17  | Protein involved in the regulation of endocytosis          |
| -1.041                        | YOL047C   | LDS2   | Protein Involved in spore wall assembly                    |
| -1.746                        | YGL178W   | MPT5   | mRNA-binding protein of the PUF family                     |
| -1.404                        | YGR023W   | MTL1   | Putative plasma membrane sensor                            |
| -2.213                        | YKL163W   | PIR3   | O-glycosylated covalently-bound cell wall protein          |
| -1.881                        | YDR055W   | PST1   | Cell wall protein containing putative GPI-attachment site  |
| -1.248                        | YBR005W   | RCR1   | Protein involved in cell wall chitin deposition            |
| -0.996                        | YPL066W   | RGL1   | Regulator of Rho1p signaling, cofactor of Tus1p            |
| -2.339                        | YDR077W   | SED1   | Major stress-induced structural GPI-cell wall glycoprotein |

## Plasma membrane transactions

|        |         |       |                                                            |
|--------|---------|-------|------------------------------------------------------------|
| -3.408 | YCL025C | AGP1  | Low-affinity, broad specificity amino acid permease        |
| -0.933 | YJL170C | ASG7  | Protein that regulates signaling from G protein Ste4p      |
| -5.099 | YDR046C | BAP3  | Amino acid permease                                        |
| -1.143 | YNL192W | CHS1  | Chitin synthase I                                          |
| -1.029 | YIR032C | DAL3  | Ureidoglycolate lyase                                      |
| -2.424 | YDR040C | ENA1  | P-type ATPase sodium pump                                  |
| -2.706 | YDR039C | ENA2  | P-type ATPase sodium pump                                  |
| -0.930 | YDR373W | FRQ1  | N-myristoylated calcium-binding protein                    |
| -1.059 | YBR021W | FUR4  | Plasma membrane localized uracil permease                  |
| -1.136 | YLR343W | GAS2  | 1,3-beta-glucanosyltransferase                             |
| -1.014 | YKR106W | GEX2  | Proton:glutathione antiporter                              |
| -2.827 | YDR508C | GNP1  | High-affinity glutamine permease                           |
| -1.120 | YGR191W | HIP1  | High-affinity histidine permease                           |
| -1.694 | YFL014W | HSP12 | Plasma membrane organization protein                       |
| -1.729 | YMR011W | HXT2  | High-affinity glucose transporter                          |
| -2.171 | YLR413W | INA1  | Protein of unknown function                                |
| -4.585 | YGR121C | MEP1  | Ammonium permease                                          |
| -3.648 | YPR138C | MEP3  | Ammonium permease of high capacity and low affinity        |
| -1.969 | YDR033W | MRH1  | Protein that localizes primarily to the plasma membrane    |
| -3.227 | YGR055W | MUP1  | High affinity methionine permease                          |
| -2.070 | YOL084W | PHM7  | Protein of unknown function                                |
| -1.519 | YBR296C | PHO89 | Plasma membrane Na <sup>+</sup> /Pi cotransporter          |
| -3.345 | YOR161C | PNS1  | Protein of unknown function                                |
| -0.918 | YLR414C | PUN1  | Plasma membrane protein with a role in cell wall integrity |
| -1.230 | YKL051W | SFK1  | Membrane protein generating normal levels of PI4P          |
| -2.002 | YDR011W | SNQ2  | Plasma membrane ATP-binding cassette transporter           |
| -2.543 | YDR536W | STL1  | Glycerol proton symporter of the plasma membrane           |
| -3.600 | YBR069C | TAT1  | Valine, leucine, isoleucine, and tyrosine transporter      |
| -2.883 | YOL020W | TAT2  | High affinity tryptophan and tyrosine permease             |

|        |         |       |                                                       |
|--------|---------|-------|-------------------------------------------------------|
| -1.314 | YGR260W | TNA1  | High affinity nicotinic acid plasma membrane permease |
| -0.997 | YBR293W | VBA2  | Permease of basic amino acids in vacuolar membrane    |
| -1.522 | YLL048C | YBT1  | Transporter of the ATP-binding cassette (ABC) family  |
| -1.574 | YGR281W | YOR1  | Plasma membrane ATP-binding cassette transporter      |
| -0.987 | YIR039C | YPS6  | Putative GPI-anchored aspartic protease               |
| -1.070 | YNL093W | YPT53 | Stress-induced Rab family GTPase                      |
| -1.353 | YGL255W | ZRT1  | High-affinity zinc transporter of the plasma membrane |

## Biosynthesis of small molecules, including aminoacids

|        |           |         |                                                                  |
|--------|-----------|---------|------------------------------------------------------------------|
| -0.955 | YMR120C   | ADE17   | Enzyme of 'de novo' purine biosynthesis                          |
| -1.112 | YBR145W   | ADH5    | Alcohol dehydrogenase isoenzyme V                                |
| -1.110 | YFL030W   | AGX1    | Alanine:glyoxylate aminotransferase (AGT)                        |
| -1.864 | YMR169C   | ALD3    | Cytoplasmic aldehyde dehydrogenase                               |
| -0.993 | YDR380W   | ARO10   | Phenylpyruvate decarboxylase                                     |
| -1.929 | YCR005C   | CIT2    | Peroxisomal citrate synthase, involved in glyoxylate cycle       |
| -1.308 | YOR100C   | CRC1    | Mitochondrial inner membrane carnitine transporter               |
| -1.625 | YEL071W   | DLD3    | 2-OH-glutarate transhydrogenase, and D-lactate dh                |
| -0.993 | YAL026C   | DRS2    | Trans-golgi network aminophospholipid translocase                |
| -0.978 | YNL191W   | DUG3    | Component of glutamine amidotransferase (GATase II)              |
| -2.701 | YCL026C-A | FRM2    | Type II nitroreductase, using NADH as reductant                  |
| -1.034 | YMR250W   | GAD1    | Glutamate decarboxylase                                          |
| -1.819 | YDR019C   | GCV1    | T subunit of the mitochondrial glycine decarboxylase             |
| -1.591 | YMR189W   | GCV2    | P subunit of the mitochondrial glycine decarboxylase             |
| -1.585 | YOR375C   | GDH1    | NADP(+)-dependent glutamate dehydrogenase                        |
| -1.231 | YIL053W   | GPP1    | Constitutive DL-glycerol-3-phosphate phosphatase                 |
| -1.083 | YER062C   | GPP2    | DL-glycerol-3-phosphate phosphatase                              |
| -1.007 | YCL030C   | HIS4    | Multifunctional enzyme of histidine biosynthesis                 |
| -0.970 | YIL020C   | HIS6    | Enzyme catalyzing fourth step in histidine pathway               |
| -1.067 | YLR099C   | ICT1    | Lysophosphatidic acid acyltransferase                            |
| -0.938 | YOR136W   | IDH2    | Subunit of mitochondrial isocitrate dehydrogenase                |
| -1.690 | YML056C   | IMD4    | Inosine monophosphate dehydrogenase                              |
| -1.170 | YIR034C   | LYS1    | Saccharopine dehydrogenase (NAD <sup>+</sup> , L-lysine-forming) |
| -1.166 | YDL182W   | LYS20   | Homocitrate synthase functioning in DNA repair                   |
| -1.016 | YFR030W   | MET10   | Subunit alpha of assimilatory sulfite reductase                  |
| -1.000 | YNL277W   | MET2    | L-homoserine-O-acetyltransferase                                 |
| -0.900 | YBR084W   | MIS1    | Mitochondrial C1-tetrahydrofolate synthase                       |
| -1.428 | YKR097W   | PCK1    | Phosphoenolpyruvate carboxykinase                                |
| -1.082 | YGL037C   | PNC1    | Nicotinamidase converting nicotinamide to nicotinic acid         |
| -1.155 | YLR180W   | SAM1    | S-adenosylmethionine synthetase                                  |
| -1.881 | YMR095C   | SNO1    | Protein of unconfirmed function                                  |
| -2.365 | YMR096W   | SNZ1    | Protein involved in vitamin B6 biosynthesis                      |
| -2.376 | YHR139C   | SPS100  | Protein required for spore wall maturation                       |
| -1.331 | YJR009C   | TDH2    | Glyceraldehyde-3-phosphate dehydrogenase, isozyme 2              |
| -1.774 | YGR144W   | THI4    | Thiazole synthase                                                |
| -0.974 | YMR271C   | URA10   | Minor orotate phosphoribosyltransferase isozyme                  |
| -1.248 | YNL160W   | YGP1    | Cell wall-related secretory glycoprotein                         |
| -1.778 | YHR033W   | YHR033W | Putative protein of unknown function                             |
| -1.053 | YJL070C   | YJL070C | Putative metallo-dependent hydrolase family protein              |

## Response to stress

|        |         |       |                                                         |
|--------|---------|-------|---------------------------------------------------------|
| -0.946 | YNL219C | ALG9  | Mannosyltransferase, involved in N-linked glycosylation |
| -1.449 | YPL250C | ATG41 | Protein of unknown function                             |
| -1.517 | YOR028C | CIN5  | Basic leucine zipper TF of the yAP-1 family             |



|        |           |         |                                                                     |
|--------|-----------|---------|---------------------------------------------------------------------|
| -1.958 | YGR088W   | CTT1    | Cytosolic catalase T                                                |
| -0.982 | YFL053W   | DAK2    | Dihydroxyacetone kinase                                             |
| -2.409 | YOL052C-A | DDR2    | Multi-stress response protein                                       |
| -1.417 | YHR043C   | DOG2    | 2-deoxyglucose-6-phosphate phosphatase                              |
| -1.388 | YER035W   | EDC2    | RNA-binding protein that activates mRNA decapping                   |
| -1.921 | YDR534C   | FIT1    | Mannoprotein that is incorporated into the cell wall                |
| -1.399 | YDL022W   | GPD1    | NAD-dependent glycerol-3-phosphate dehydrogenase                    |
| -4.548 | YPL223C   | GRE1    | Hydrophilin essential in desiccation-rehydration process            |
| -2.503 | YOL151W   | GRE2    | methylbutanal reductase and NADPH-dependent methylglyoxal reductase |
| -1.152 | YLR113W   | HOG1    | MAP kinase involved in osmoregulation                               |
| -1.422 | YGR043C   | NQM1    | Transaldolase of unknown function                                   |
| -1.646 | YMR174C   | PAI3    | Cytoplasmic proteinase A (Pep4p) inhibitor                          |
| -1.258 | YMR105C   | PGM2    | Phosphoglucomutase                                                  |
| -1.149 | YBR092C   | PHO3    | Constitutively expressed acid phosphatase                           |
| -1.295 | YMR175W   | SIP18   | Phospholipid-binding hydrophilin                                    |
| -1.699 | YPL130W   | SPO19   | Meiosis-specific prospore protein                                   |
| -1.477 | YBL075C   | SSA3    | ATPase involved in protein folding and the response to stress       |
| -1.008 | YLR006C   | SSK1    | Cytoplasmic phosphorelay osmosensor and regulator                   |
| -1.081 | YDR074W   | TPS2    | Phosphatase subunit of the trehalose-6-P synthase                   |
| -1.151 | YMR261C   | TPS3    | Regulatory subunit of trehalose-6-phosphate synthase                |
| -1.257 | YML100W   | TSL1    | Large subunit of trehalose 6-phosphate synthase                     |
| -1.298 | YDR134C   | YDR134C | Cell wall protein                                                   |
| -0.955 | YJL144W   | YJL144W | Hydrophilin essential in desiccation-rehydration process            |

## Ribosome biogenesis

|        |         |        |                                                        |
|--------|---------|--------|--------------------------------------------------------|
| -1.081 | YAL059W | ECM1   | Pre-ribosomal factor involved in 60S subunit export    |
| -0.919 | YPL226W | NEW1   | ATP binding cassette protein                           |
| -0.994 | YPR144C | NOC4   | Nucleolar protein                                      |
| -0.976 | YER126C | NSA2   | Protein constituent of 66S pre-ribosomal particles     |
| -1.148 | YPR102C | RPL11A | Ribosomal 60S subunit protein L11A                     |
| -1.113 | YKL006W | RPL14A | Ribosomal 60S subunit protein L14A                     |
| -1.104 | YBL087C | RPL23A | Ribosomal 60S subunit protein L23A                     |
| -1.017 | YGL031C | RPL24A | Ribosomal 60S subunit protein L24A                     |
| -1.521 | YGR148C | RPL24B | Ribosomal 60S subunit protein L24B                     |
| -1.097 | YLR344W | RPL26A | Ribosomal 60S subunit protein L26A                     |
| -1.039 | YLR406C | RPL31B | Ribosomal 60S subunit protein L31B                     |
| -1.101 | YDL191W | RPL35A | Ribosomal 60S subunit protein L35A                     |
| -0.988 | YDL136W | RPL35B | Ribosomal 60S subunit protein L35B                     |
| -1.159 | YLR325C | RPL38  | Ribosomal 60S subunit protein L38                      |
| -1.451 | YDL184C | RPL41A | Ribosomal 60S subunit protein L41A                     |
| -1.085 | YPR043W | RPL43A | Ribosomal 60S subunit protein L43A                     |
| -0.929 | YLR448W | RPL6B  | Ribosomal 60S subunit protein L6B                      |
| -1.400 | YGL076C | RPL7A  | Ribosomal 60S subunit protein L7A                      |
| -0.978 | YML091C | RPM2   | Protein subunit of mitochondrial RNase P               |
| -1.101 | YDL081C | RPP1A  | Ribosomal stalk protein P1 alpha                       |
| -1.151 | YOL039W | RPP2A  | Ribosomal protein P2 alpha                             |
| -1.072 | YBR048W | RPS11B | Protein component of the small (40S) ribosomal subunit |
| -1.169 | YJL191W | RPS14B | Protein component of the small (40S) ribosomal subunit |
| -1.358 | YML024W | RPS17A | Ribosomal protein 51 (rp51) of the small (40s) subunit |
| -1.396 | YML026C | RPS18B | Protein component of the small (40S) ribosomal subunit |
| -0.931 | YJR145C | RPS4A  | Protein component of the small (40S) ribosomal subunit |
| -2.372 | YBL072C | RPS8A  | Protein component of the small (40S) ribosomal subunit |
| -1.121 | YER102W | RPS8B  | Protein component of the small (40S) ribosomal subunit |
| -1.101 | YBR189W | RPS9B  | Protein component of the small (40S) ribosomal subunit |

|        |         |         |                                                                       |
|--------|---------|---------|-----------------------------------------------------------------------|
| -1.011 | YDL229W | SSB1    | ATPase - ribosome-associated molecular chaperone                      |
| -0.939 | YPR016C | TIF6    | Constituent of 66S pre-ribosomal particles                            |
| -1.061 | YJR041C | URB2    | Protein required for normal metabolism of the rRNA primary transcript |
| -1.281 | YJL109C | UTP10   | Nucleolar protein                                                     |
| -1.078 | YGR283C | YGR283C | Putative methyltransferase                                            |

## RNA metabolism

|        |         |       |                                                         |
|--------|---------|-------|---------------------------------------------------------|
| -0.973 | YHR081W | LRP1  | Nuclear exosome-associated nucleic acid binding protein |
| -0.900 | YOR116C | RPO31 | RNA polymerase III largest subunit C160                 |
| -1.532 | YHR087W | RTC3  | Protein of unknown function involved in RNA metabolism  |
| -2.122 | YNR034W | SOL1  | Protein with a possible role in tRNA export             |

## Endomembrane system

|        |         |       |                                                                     |
|--------|---------|-------|---------------------------------------------------------------------|
| -1.204 | YOR152C | ATG40 | Autophagy receptor with a role in endoplasmic reticulum degradation |
| -1.244 | YLL014W | EMC6  | Member of conserved ER transmembrane complex                        |
| -1.521 | YMR292W | GOT1  | Homodimeric protein that is packaged into COPII vesicles            |
| -0.917 | YDR492W | IZH1  | Membrane protein involved in zinc ion homeostasis                   |
| -1.052 | YNL297C | MON2  | Protein with a role in endocytosis and vacuole integrity            |
| -1.087 | YGL010W | MPO1  | Protein involved in metabolism of phytosphingosine                  |
| -1.313 | YDL232W | OST4  | Subunit of the oligosaccharyltransferase complex of the ER lumen    |
| -1.153 | YLR073C | RFU1  | Protein that inhibits Doa4p deubiquitinating activity               |
| -0.916 | YDR233C | RTN1  | Reticulon protein                                                   |
| -1.046 | YLL016W | SDC25 | Non-essential Ras guanine nucleotide exchange factor (GEF)          |

## Mitochondrial metabolism

|        |           |           |                                                                      |
|--------|-----------|-----------|----------------------------------------------------------------------|
| -1.121 | Q0070     | AI5_ALPHA | Endonuclease I-SceIV                                                 |
| -1.177 | YGR110W   | CLD1      | Mitochondrial cardiolipin-specific phospholipase                     |
| -1.176 | YMR256C   | COX7      | Subunit VII of cytochrome c oxidase (Complex IV)                     |
| -1.293 | YJR048W   | CYC1      | Cytochrome c, isoform 1                                              |
| -1.845 | YGR052W   | FMP48     | Putative protein of unknown function                                 |
| -1.497 | YBR004C   | GPI18     | Functional ortholog of human PIG-V                                   |
| -1.328 | YJR091C   | JSN1      | Member of the Puf family of RNA-binding proteins                     |
| -1.026 | YKL150W   | MCR1      | Mitochondrial NADH-cytochrome b5 reductase                           |
| -1.087 | YHR162W   | MPC2      | Highly conserved subunit of the mitochondrial pyruvate carrier (MPC) |
| -1.644 | YGR243W   | MPC3      | Highly conserved subunit of the mitochondrial pyruvate carrier (MPC) |
| -4.944 | YJL116C   | NCA3      | Protein involved in mitochondrion organization                       |
| -1.337 | YHR001W-A | QCR10     | Subunit of the ubiquinol-cytochrome c oxidoreductase complex         |
| -1.229 | YGR183C   | QCR9      | Subunit 9 of ubiquinol cytochrome-c reductase (Complex III)          |
| -1.359 | YLR251W   | SYM1      | Protein required for ethanol metabolism                              |
| -1.297 | YJL045W   | YJL045W   | Minor succinate dehydrogenase isozyme                                |

## Genome maintenance

|        |         |        |                                                               |
|--------|---------|--------|---------------------------------------------------------------|
| -1.019 | YGL251C | HFM1   | Meiosis specific DNA helicase                                 |
| -1.371 | YDR013W | PSF1   | Subunit of the GINS complex (Sld5p, Psf1p, Psf2p, Psf3p)      |
| -1.092 | YLR329W | REC102 | Protein involved in early stages of meiotic recombination     |
| -0.985 | YKR101W | SIR1   | Protein involved in silencing at mating-type loci HML and HMR |

## Protein modification

|        |         |      |                                                                     |
|--------|---------|------|---------------------------------------------------------------------|
| -0.920 | YJR036C | HUL4 | Protein with similarity to hect domain E3 ubiquitin-protein ligases |
| -0.977 | YGR123C | PPT1 | Protein serine/threonine phosphatase                                |

## Transcription factors

|        |         |      |                           |
|--------|---------|------|---------------------------|
| -1.332 | YBR239C | ERT1 | Transcriptional regulator |
| -1.438 | YJL110C | GZF3 | GATA zinc finger protein  |

## Pexophagy

|        |         |       |                                                   |
|--------|---------|-------|---------------------------------------------------|
| -1.306 | YJL185C | ATG36 | Pex3p interacting protein, required for pexophagy |
|--------|---------|-------|---------------------------------------------------|

## Invasive growth

|        |         |      |                             |
|--------|---------|------|-----------------------------|
| -1.598 | YMR316W | DIA1 | Protein of unknown function |
|--------|---------|------|-----------------------------|

## Zinc ion homeostasis

|        |         |      |                                                   |
|--------|---------|------|---------------------------------------------------|
| -1.066 | YOL101C | IZH4 | Membrane protein involved in zinc ion homeostasis |
|--------|---------|------|---------------------------------------------------|

## Nuclear pore complex

|        |         |       |                           |
|--------|---------|-------|---------------------------|
| -1.119 | YLL023C | POM33 | Transmembrane nucleoporin |
|--------|---------|-------|---------------------------|

## Unknown function

|        |           |           |                                                                   |
|--------|-----------|-----------|-------------------------------------------------------------------|
| -1.284 | YHR126C   | ANS1      | Putative GPI protein                                              |
| -2.012 | YLR267W   | BOP2      | Protein of unknown function                                       |
| -1.501 | YGR146C   | ECL1      | Protein of unknown function                                       |
| -1.642 | YDR070C   | FMP16     | Protein of unknown function                                       |
| -1.772 | YHR049W   | FSH1      | Putative serine hydrolase                                         |
| -1.129 | YPL280W   | HSP32     | Possible chaperone and cysteine protease                          |
| -1.353 | YOR391C   | HSP33     | Possible chaperone and cysteine protease                          |
| -1.011 | YHR151C   | MTC6      | Protein of unknown function                                       |
| -2.457 | YJL108C   | PRM10     | Pheromone-regulated protein                                       |
| -1.077 | YMR034C   | RCH1      | Putative transporter                                              |
| -1.490 | YGR213C   | RTA1      | Protein involved in 7-amincholesterol resistance                  |
| -2.367 | YMR118C   | SHH3      | Putative mitochondrial inner membrane protein of unknown function |
| -1.104 | YMR322C   | SNO4      | Possible chaperone and cysteine protease                          |
| -1.617 | YBR150C   | TBS1      | Protein of unknown function                                       |
| -2.786 | YBR032W   | YBR032W   | Putative protein of unknown function                              |
| -0.902 | YBR063C   | YBR063C   | Putative protein of unknown function                              |
| -0.976 | YDR034W-B | YDR034W-B | Predicted tail-anchored plasma membrane protein                   |
| -0.965 | YEL067C   | YEL067C   | Putative protein of unknown function                              |
| -0.976 | YER039C-A | YER039C-A | Putative protein of unknown function                              |
| -2.690 | YER053C-A | YER053C-A | Protein of unknown function                                       |
| -1.145 | YGL193C   | YGL193C   | Haploid-specific gene repressed by a1-alpha2                      |
| -1.763 | YGL258W-A | YGL258W-A | Putative protein of unknown function                              |
| -1.295 | YGR066C   | YGR066C   | Putative protein of unknown function                              |
| -1.535 | YGR201C   | YGR201C   | Putative protein of unknown function                              |
| -2.313 | YHR022C   | YHR022C   | Putative protein of unknown function                              |
| -1.135 | YIL029C   | YIL029C   | Putative protein of unknown function                              |
| -1.687 | YJL107C   | YJL107C   | Putative protein of unknown function                              |
| -1.014 | YJR039W   | YJR039W   | Putative protein of unknown function                              |
| -1.655 | YJR115W   | YJR115W   | Putative protein of unknown function                              |
| -0.983 | YKL066W   | YKL066W   | Dubious open reading frame                                        |
| -1.752 | YKL071W   | YKL071W   | Putative protein of unknown function                              |
| -1.422 | YKR011C   | YKR011C   | Protein of unknown function                                       |
| -1.052 | YLR030W   | YLR030W   | Putative protein of unknown function                              |
| -1.110 | YLR031W   | YLR031W   | Putative protein of unknown function                              |
| -0.956 | YLR046C   | YLR046C   | Putative membrane protein                                         |
| -1.171 | YLR108C   | YLR108C   | Protein of unknown function                                       |
| -1.124 | YML002W   | YML002W   | Putative protein of unknown function                              |
| -1.466 | YMR102C   | YMR102C   | Protein of unknown function                                       |
| -1.287 | YMR181C   | YMR181C   | Protein of unknown function                                       |
| -3.009 | YMR244W   | YMR244W   | Putative protein of unknown function                              |
| -1.273 | YNL195C   | YNL195C   | Protein of unknown function                                       |

|        |         |         |                                                            |
|--------|---------|---------|------------------------------------------------------------|
| -1.809 | YNR014W | YNR014W | Putative protein of unknown function                       |
| -0.910 | YOR309C | YOR309C | Dubious open reading frame                                 |
| -0.938 | YOR385W | YOR385W | Putative protein of unknown function                       |
| -1.214 | YPL035C | YPL035C | Dubious open reading frame                                 |
| -1.161 | YPL088W | YPL088W | Putative aryl alcohol dehydrogenase                        |
| -1.513 | YGL259W | YPS5    | Protein with similarity to GPI-anchored aspartic proteases |



**Table S2** Transcriptional factors (TFs) most strongly involved in the regulation of genes selected in our transcriptome analysis. The list was generated with the help of the Yeastract+ web tool and database [20] (<http://www.yeastract.com>). Each TF name is accompanied by the description of function according to SGD and the list of genes that are regulated by that TF according to Yeastract+. See the Results section for a more detailed description of these parameters and the filtering strategy.

## Up-regulated genes

| TF     | Rank | Description                                                                                                                                                                                                                     | Regulated genes                                                                                                                                                                                                                                                                                                                                                                   |
|--------|------|---------------------------------------------------------------------------------------------------------------------------------------------------------------------------------------------------------------------------------|-----------------------------------------------------------------------------------------------------------------------------------------------------------------------------------------------------------------------------------------------------------------------------------------------------------------------------------------------------------------------------------|
| Adr1p  | 11.1 | Carbon source-responsive zinc-finger transcription factor; required for transcription of the glucose-repressed gene ADH2, of peroxisomal protein genes, and of genes required for ethanol, glycerol, and fatty acid utilization | ADH2, ALD4, ALD5, ASP3-1, ASP3-3, ATP11, BAT2, BRF1, BTN2, COX17, COX23, CTA1, DCG1, DDI2, DIC1, ECI1, ENT1, ERG6, FAA2, FMC1, FOX2, FSF1, GAT2, GDH2, HPT1, HXT17, HXT6, IBD2, ICL2, IDP3, LAP3, LPX1, MOD5, MRPL31, MRPL44, OAC1, PGU1, PHM6, POX1, Q0010, QDR1, QDR3, RRN11, SFG1, SPS19, YEL076C, YEL076C-A, YER138W-A, YFL067W, YHR214W-A, YIG1, YKR075C, YMR193C-A, YNL122C |
| Mga1p  | 9.4  | Protein similar to heat shock transcription factor; multicopy suppressor of pseudohyphal growth defects of ammonium permease mutants                                                                                            | ADH2, AIM34, ALD4, ASP3-1, ASP3-2, ASP3-3, ASP3-4, ATP11, BAT2, BTN2, CDC21, COX17, COX23, CSM3, DCG1, DDI3, ERG6, FIR1, GAT2, HIS7, HXT17, IPL1, LAS17, LEU2, MAM33, MCD1, MIF2, MRPL31, MTH1, OAC1, OYE3, PCL1, PHM6, POL32, POX1, RKM1, SEN34, SEO1, SFG1, SFH5, SGO1, SHO1, SPS19, STP4, TOS2, TUB4, YBL107W-A, YER138W-A, YFL068W, YHP1, YKR075C, YOR389W, YPL278C, YUH1     |
| Fzf1p  | 6.8  | Transcription factor involved in sulfite metabolism; sole identified regulatory target is SSU1; overexpression suppresses sulfite-sensitivity of many unrelated mutants due to hyperactivation of SSU1                          | BAT2, CDA1, CDC21, CTK1, DDI2, DDI3, DSN1, DUR3, FRE5, HIS7, PCL1, POX1, SET5, SGO1, TOS4, YJR011C, YPT10, YSP3                                                                                                                                                                                                                                                                   |
| Gzf3p  | 5.1  | GATA zinc finger protein; negatively regulates nitrogen catabolic gene expression by competing with Gat1p for GATA site binding; function requires a repressive carbon source; dimerizes with Dal80p and binds to Tor1p         | AIM34, BAT2, CDC21, DAL1, DAL4, DAL5, DAL7, DAL80, DCG1, DUR3, FIR1, FMC1, HPA3, MIG3, MRPL44, PCL1, PHM6, POL32, PUT1, RRN11, SFG1, SFH5, SGO1, STP4, THI80, TOS4, YHP1, YIG1, YKR075C, YOR389W, YPL278C                                                                                                                                                                         |
| Dal81p | 4.8  | Positive regulator of genes in multiple nitrogen degradation pathways                                                                                                                                                           | ALD4, ALD5, BAT2, BTN2, DAL1, DAL4, DAL5, DAL7, ERF2, GAT2, GDH2, LEU2, MTH1, NRK1, OAC1, OPT2, PCL1, PHM6, PUT1, QDR3, SFG1, SFH5, YGK3, YLR257W                                                                                                                                                                                                                                 |
| Cat8p  | 4.6  | Zinc cluster transcriptional activator; necessary for derepression of a variety of genes under non-fermentative growth conditions, active after diauxic shift, binds carbon source responsive elements                          | AAC3, ADH2, ALD4, CTA1, DIC1, FOX2, GDH2, LEU2, LPX1, MF(ALPHA)2, OAC1, POX1, PRO3, RRN11, TOS4, YSP3                                                                                                                                                                                                                                                                             |
| Dal80p | 3.6  | Negative regulator of genes in multiple nitrogen degradation pathways; expression is regulated by nitrogen levels and by Gln3p; member of the GATA-binding family, forms homodimers and heterodimers with Gzf3p                 | ASP3-1, BAT2, DAL1, DAL4, DAL5, DAL7, DAL80, DCG1, DUR3, HPA3, IFM1, MRP13, PHM6, PUT1, TOS4                                                                                                                                                                                                                                                                                      |
| Tod6p  | 3.1  | PAC motif binding protein involved in rRNA and ribosome biogenesis; subunit of the RPD3L histone deacetylase complex; Myb-like HTH transcription factor                                                                         | ADH2, BAT2, CDC21, DCG1, DSN1, MIG3, PCL1, STP4, TOS4, YPT10                                                                                                                                                                                                                                                                                                                      |
| Sut2p  | 2.1  | Zn2Cys6 family transcription factor; positively regulates sterol uptake under anaerobic conditions with SUT1; represses filamentation-inducing genes during non-starvation conditions; positively regulates mating              | ALD4, ASP3-1, BAT2, BUD8, CDA1, CDC21, DSN1, ERF2, GAT2, PCL1, SUT2, TOS4, YPT10                                                                                                                                                                                                                                                                                                  |
| Wtm2p  | 2.0  | Transcriptional modulator; involved in regulation of meiosis, silencing, and expression of RNR genes; involved in response to replication stress                                                                                | BAT2, CDC21, DSN1, FRE5, GAT2, IPI1, PCL1, RAD27, SGO1, STP4, TOS4, YLR257W                                                                                                                                                                                                                                                                                                       |
| Rpi1p  | 1.5  | Transcription factor, allelic differences between S288C and Sigma1278b; mediates fermentation stress tolerance by modulating cell wall integrity                                                                                | BAT2, CDC21, DBP8, DSN1, FRE5, GAT2, PCL1, TOS4, YDL211C, YLR257W, ZDS2                                                                                                                                                                                                                                                                                                           |

## Down-regulated genes

| TF    | Rank  | Description                                                                                                                                                                                                              | Regulated genes                                                                                                                                                                                                                                                                                                                                                                                                                                                                                                                                                                                                                                                                                  |
|-------|-------|--------------------------------------------------------------------------------------------------------------------------------------------------------------------------------------------------------------------------|--------------------------------------------------------------------------------------------------------------------------------------------------------------------------------------------------------------------------------------------------------------------------------------------------------------------------------------------------------------------------------------------------------------------------------------------------------------------------------------------------------------------------------------------------------------------------------------------------------------------------------------------------------------------------------------------------|
| Hot1p | 126.0 | Transcription factor for glycerol biosynthetic genes; required for the transient induction of glycerol biosynthetic genes GPD1 and GPP2 in response to high osmolarity; targets Hog1p to osmostress responsive promoters | ALD3, CTT1, ENA1, FIT1, FLC1, FMP48, GPD1, GPP1, GPP2, GRE1, GRE2, HSP12, MPC3, NQM1, PAI3, PHM7, PNC1, PNS1, RTC3, SED1, SFK1, SIP18, SPS100, STL1, THI4, TPS2, TSL1, URA10, YGP1, YGR066C, YJL107C, YNL195C                                                                                                                                                                                                                                                                                                                                                                                                                                                                                    |
| Crz1p | 40.0  | Transcription factor, activates transcription of stress response genes; nuclear localization is positively regulated by calcineurin-mediated dephosphorylation                                                           | AGP1, ALD3, ARO10, ASG7, ATG40, CCW12, CCW22, CHS1, CIT2, CLD1, COX7, CTT1, CWP1, CYC1, DAL3, DDR2, DIA1, DRS2, ECM13, ECM21, EDC2, ENA1, ENA2, ERT1, FLC1, FMP16, FMP48, FSH1, FUR4, GAD1, GCV2, GDH1, GNP1, GPD1, GPI18, GPP1, GPP2, HSP12, HSP150, HXT2, ICT1, IDH2, INA1, IZH4, KRE6, LYS20, MEP1, MET2, MPC2, MPC3, MPO1, MRH1, MUP1, NQM1, NSA2, PCK1, PGM2, PHM7, PHO3, PHO89, PIR3, PNC1, PNS1, PUN1, QCR9, RCH1, RCR1, RGL1, ROQ1, RPL11A, RPL24A, RPL24B, RPL38, RPP1A, RTA1, RTC3, SDC25, SED1, SIP18, SNO1, SNQ2, SNZ1, SPS100, STL1, SYM1, THI4, TPS2, TPS3, TSL1, YDR034W-B, YGP1, YGR201C, YGR283C, YHR033W, YLR046C, YLR108C, YMR102C, YNL195C, YNR014W, YOR309C, YOR385W, YPT53 |
| Gis1p | 33.5  | Histone demethylase and transcription factor; regulates genes during nutrient limitation                                                                                                                                 | AGX1, ALD3, ANS1, BAP3, BOP2, CIN5, CIT2, COX7, CRC1, CTT1, CWP1, CYC1, DAL3, DDR2, DIA1, ECM13, ECM21, ERT1, FMP16, FMP48, GAD1, GDH1, GEX2, GPD1, GPP1, GPP2, GRE1, GRE2, HSP12, HSP32, HSP33, HXT2, IZH4, LYS1, MEP1, MPO1, MUP1, NQM1, PAI3, PCK1, PGM2, PHM7, PHO89, PIR3, PNS1, POM33, QCR10, ROQ1, RPP2A, RTC3, SDC25, SHH3, SIP18, SNO4, SPS100, SSA3, STL1, SYM1, TAT1, TAT2, TPS2, URA10, YDR034W-B, YGP1, YGR066C, YGR201C, YHR022C, YJL045W, YLR031W, YMR181C, YNL195C, YNR014W, YPS6                                                                                                                                                                                                |
| Rlm1p | 29.4  | MADS-box transcription factor; component of the protein kinase C-mediated MAP kinase pathway involved in the maintenance of cell integrity                                                                               | ALD3, ARO10, BOP2, CCW12, CCW14, CHS1, CTT1, CWP1, DDR2, ECL1, ECM13, FLC1, FMP16, FMP48, FRQ1, GAD1, GPD1, GPP1, GPP2, GRE1, GRE2, HOG1, HSP12, HSP150, HUL4, ICT1, INA1, KRE6, MCR1, MPC3, MTL1, NCA3, NOC4, NQM1, NSA2, PAI3, PCK1, PGM2, PHM7, PHO3, PIR3, PNC1, PNS1, PRM10, PST1, PUN1, RCR1, RPL24A, RTA1, RTC3, SED1, SHH3, SIP18, SNO4, SPS100, STL1, SYM1, TAT2, TPS2, TSL1, UTP10, YDR034W-B, YGL258W-A, YGP1, YGR066C, YHR033W, YJL107C, YJR115W, YLR031W, YNL195C, YNR014W, YOR309C, YPL088W, YPS5, YPS6, YPT53, ZRT1                                                                                                                                                               |
| lfh1p | 20.7  | Coactivator, regulates transcription of ribosomal protein (RP) genes                                                                                                                                                     | ADH5, DLD3, ECL1, FRM2, GAS2, GDH1, HIS4, HIS6, HSP12, IMD4, IZH4, LYS20, NCA3, PIR3, RPL11A, RPL14A, RPL23A, RPL24A, RPL24B, RPL26A, RPL31B, RPL35A, RPL35B, RPL38, RPL41A, RPL43A, RPL6B, RPL7A, RPP1A, RPP2A, RPS11B, RPS14B, RPS17A, RPS18B, RPS4A, RPS8A, RPS8B, RPS9B, RTA1, SNZ1, YDR034W-B, YKR011C, YLR030W, YLR108C                                                                                                                                                                                                                                                                                                                                                                    |
| Met4p | 18.7  | Leucine-zipper transcriptional activator; responsible for regulation of sulfur amino acid pathway                                                                                                                        | ADH5, ALD3, ARO10, ATG41, CCW12, CCW14, CCW22, CTT1, CWP1, DDR2, DLD3, DUG3, ECM13, FMP16, GAD1, GCV1, GCV2, GPD1, GPP1, GPP2, GRE2, HSP12, HSP33, HXT2, LRP1, MET10, MET2, MRH1, MUP1, NEW1, NQM1, PHO3, PIR3, PST1, PUN1, RCH1, RPL24A, RPL24B, RPL26A, RPL35A, RPL35B, RPL7A, RPS11B, RPS17A, RPS4A, RPS9B, RTC3, SAM1, SIR1, SNO4, SNZ1, SSA3, STL1, TDH2, TPS2, URA10, UTP10, YGP1, YHR022C, YHR033W, YMR181C, YOR309C, ZRT1                                                                                                                                                                                                                                                                |

|       |      |                                                                                                                                                                                                                            |                                                                                                                                                                                                                                                                                                                                                                                                                                                                                                                                                                                                                        |
|-------|------|----------------------------------------------------------------------------------------------------------------------------------------------------------------------------------------------------------------------------|------------------------------------------------------------------------------------------------------------------------------------------------------------------------------------------------------------------------------------------------------------------------------------------------------------------------------------------------------------------------------------------------------------------------------------------------------------------------------------------------------------------------------------------------------------------------------------------------------------------------|
| Mig1p | 18.2 | Transcription factor involved in glucose repression; regulates filamentous growth along with Mig2p in response to glucose depletion                                                                                        | ALD3, ARO10, CIT2, CLD1, CTT1, CYC1, DDR2, DOG2, ECL1, ECM5, EDC2, ENA1, FMP16, FMP48, GAD1, GCV2, GPD1, GRE2, HSP12, HSP33, HXT2, ICT1, INA1, IZH1, IZH4, KRE6, MPC3, MPO1, MRH1, NQM1, PAI3, PHM7, PHO3, PHO89, PIR3, PNC1, PNS1, POM33, RCH1, RPM2, RTC3, SDC25, SED1, SNO4, TAT1, TPS2, TSL1, YDR034W-B, YGP1, YHR022C, YJL107C, YKL066W, YMR102C, YMR181C, YNL195C, YNR014W, YPS5                                                                                                                                                                                                                                 |
| Mga2p | 17.6 | ER membrane protein involved in regulation of OLE1 transcription; inactive ER form dimerizes and one subunit is then activated by ubiquitin/proteasome-dependent processing followed by nuclear targeting                  | ADE17, AGP1, AGX1, ALD3, BOP2, CCW22, CHS1, CIT2, CLD1, CTT1, DDR2, ECL1, ECM1, EDC2, FLC1, FMP48, GAD1, GCV2, GOT1, GPD1, GPI18, GPP2, GRE1, GRE2, HSP12, HSP150, ICT1, IMD4, INA1, IZH1, IZH4, LDS2, MCR1, MEP1, MET10, MET2, MPC3, MPT5, MUP1, NEW1, PGM2, PHM7, PHO3, PNC1, PPT1, PRM10, PUN1, RCH1, RFU1, ROQ1, RPL14A, RPL23A, RPL24A, RPL24B, RPL26A, RPL31B, RPL35B, RPL38, RPL43A, RPL6B, RPL7A, RPP1A, RPP2A, RPS14B, RPS17A, RPS18B, RPS4A, RPS8A, RPS8B, RPS9B, RTA1, RTC3, SED1, SNZ1, SOL1, SPS100, SSB1, SYM1, THI4, TNA1, TPS2, TSL1, YDR034W-B, YGP1, YKR011C, YNL195C, YOR309C, YPL088W, YPT53, ZRT1 |
| Stp2p | 16.1 | Transcription factor; activated by proteolytic processing in response to signals from the SPS sensor system for external amino acids; activates transcription of amino acid permease genes                                 | AGP1, ARO10, ASG7, ATG40, BAP3, BOP2, CLD1, COX7, CRC1, CWP1, DAL3, DIA1, ECL1, EDC2, FMP16, FRM2, GAD1, GCV1, GDH1, GNP1, ICT1, INA1, LDS2, MCR1, MET10, MPC2, MUP1, NQM1, PAI3, PHO89, POM33, PPT1, PUN1, RCH1, RCR1, RGL1, ROQ1, RPM2, RTA1, RTC3, SDC25, SED1, SFK1, SOL1, SYM1, YBR032W, YGP1, YJL045W, YLR031W, YPL088W, YPS6, ZRT1                                                                                                                                                                                                                                                                              |
| Stp1p | 14.8 | Transcription factor; undergoes proteolytic processing by SPS sensor component Ssy5p in response to extracellular amino acids; activates transcription of amino acid permease genes and may have a role in tRNA processing | AGP1, ARO10, ASG7, ATG40, ATG41, BAP3, BOP2, CLD1, COX7, CRC1, DAL3, DIA1, ECL1, EDC2, FIT1, FMP16, FRM2, GAD1, GCV1, GDH1, GNP1, GPD1, HIS4, ICT1, IMD4, INA1, KRE6, LDB17, LDS2, LYS1, LYS20, MCR1, MET10, MET2, MPC2, MTC6, MUP1, NQM1, PAI3, PHO89, PNC1, POM33, PPT1, PSF1, PUN1, RCH1, RCR1, ROQ1, RPM2, RTA1, RTC3, SDC25, SED1, SFK1, SOL1, SYM1, TAT1, TAT2, TSL1, YBR032W, YGP1, YGR283C, YJL045W, YLR031W, YML002W, YMR102C, YOR385W, YPL088W, YPS6, ZRT1                                                                                                                                                   |
| Nrg1p | 14.0 | Transcriptional repressor; mediates glucose repression and negatively regulates a variety of processes including filamentous growth and alkaline pH response                                                               | AGP1, ASG7, BOP2, CCW22, COX7, CRC1, CTT1, CWP1, CYC1, DAL3, DIA1, DLD3, DOG2, ECM13, EDC2, ENA1, FMP16, FMP48, GNP1, HIS6, HSP12, HXT2, ICT1, IDH2, INA1, MCR1, MEP3, PCK1, PGM2, PHM7, PHO89, PNS1, PRM10, RCR1, RPM2, SED1, SIR1, SNQ2, STL1, TAT1, TBS1, YHR022C, YHR033W, YJL107C, YMR102C, ZRT1                                                                                                                                                                                                                                                                                                                  |
| Gzf3p | 13.8 | GATA zinc finger protein; negatively regulates nitrogen catabolic gene expression by competing with Gat1p for GATA site binding; function requires a repressive carbon source; dimerizes with Dal80p and binds to Tor1p    | AGP1, ANS1, ARO10, CCW12, CIN5, CIT2, CWP1, CYC1, DAL3, ECL1, ECM13, ECM5, ENA1, ERT1, FMP48, FSH1, GCV1, GCV2, GEX2, GPP1, GPP2, GZF3, HIS4, HSP12, ICT1, IZH4, LRP1, LYS1, MEP1, MEP3, PHO3, RCH1, RCR1, RTC3, SED1, SIP18, SNO1, SNZ1, SPS100, STL1, YBT1, YGP1, YJL107C, YLR108C, YNR014W, ZRT1                                                                                                                                                                                                                                                                                                                    |
| Sko1p | 13.6 | Basic leucine zipper transcription factor of the ATF/CREB family; cytosolic and nuclear protein involved in osmotic and oxidative stress responses                                                                         | AGP1, AGX1, ALD3, ATG41, CCW12, CIN5, CTT1, CWP1, DAL3, DDR2, ECL1, ENA1, FIT1, FLC1, FMP48, FSH1, GAS2, GCV1, GCV2, GNP1, GPD1, GPP1, GPP2, GRE1, GRE2, GZF3, HIS4, HOG1, HSP12, HSP32, HSP33, HXT2, ICT1, IZH4, LYS1, LYS20, MCR1, MET10, MPC3, NQM1, PAI3, PHM7, PHO3, PIR3, PNC1, PNS1, POM33, PRM10, QCR9, RCH1, RPL11A, RPL24B, RPL35B, RPS17A, RPS4A, RTC3, SED1, SFK1, SIP18, SNO4, SNQ2, SOL1, SPS100, STL1, TDH2, THI4, TPS2, TSL1, URB2, UTP10, YER053C-A, YHR022C, YHR033W, YJL107C, YJR115W, YLR108C, YPS5                                                                                                |

|       |      |                                                                                                                                                                                                                         |                                                                                                                                                                                                                                                                                                                                                                                    |
|-------|------|-------------------------------------------------------------------------------------------------------------------------------------------------------------------------------------------------------------------------|------------------------------------------------------------------------------------------------------------------------------------------------------------------------------------------------------------------------------------------------------------------------------------------------------------------------------------------------------------------------------------|
| Gat4p | 13.3 | Protein containing GATA family zinc finger motifs; involved in spore wall assembly                                                                                                                                      | AGX1, ALD3, ARO10, BOP2, CTT1, CWP1, CYC1, DDR2, ECM13, FMP48, FRM2, GAD1, GPP1, GPP2, GRE2, HSP12, HSP32, HSP33, HXT2, ICT1, IZH4, MUP1, PAI3, PCK1, PHM7, PHO3, PHO89, PIR3, PNS1, ROQ1, RTA1, RTC3, SHH3, SNO4, SPS100, SSA3, YDR034W-B, YGP1, YGR066C, YGR201C, YLR108C, YNR014W                                                                                               |
| Nrg2p | 13.0 | Transcriptional repressor; mediates glucose repression and negatively regulates filamentous growth                                                                                                                      | ASG7, COX7, CRC1, CTT1, CYC1, DAL3, DOG2, ENA1, FMP16, IDH2, MCR1, PGM2, PHO89, PNS1, RPM2, TAT1, YHR033W, ZRT1                                                                                                                                                                                                                                                                    |
| Hap1p | 13.0 | Zinc finger transcription factor; involved in the complex regulation of gene expression in response to levels of heme and oxygen                                                                                        | ATG40, CCW12, CCW22, CIN5, CLD1, COX7, CTT1, CWP1, CYC1, DDR2, ECM13, EDC2, ENA1, ERT1, FMP48, GNP1, GPP2, GRE1, HOG1, HSP12, HXT2, IZH1, IZH4, LYS20, MCR1, MPC3, NCA3, PAI3, PCK1, PHM7, PHO3, PHO89, PIR3, QCR10, QCR9, RPL23A, RPL38, RPM2, RPS4A, RTN1, SAM1, SED1, SFK1, SNQ2, STL1, TBS1, TSL1, YER053C-A, YGL193C, YGP1, YHR022C, YJL107C, YJR115W, YLR108C, YMR102C, YOR1 |
| Rgm1p | 10.9 | Putative zinc finger transcription factor; overproduction impairs cell growth and induces expression of genes involved in monosaccharide catabolism and aldehyde metabolism; regulates expression of subtelomeric genes | ALD3, CHS1, COX7, CTT1, CWP1, CYC1, DDR2, DIA1, FIT1, FMP16, GAD1, GAS2, GPD1, GPP2, GRE2, HSP12, ICT1, MCR1, MET10, PCK1, PGM2, PNC1, POM33, PST1, QCR10, QCR9, RCH1, RGL1, RPL24B, RPP2A, RPS11B, RPS18B, RTC3, SAM1, SED1, SFK1, SNQ2, SNZ1, STL1, SYM1, TIF6, TPS2, TSL1, YGP1, YKL071W, YLR030W, YML002W, YMR181C, YPL088W                                                    |
| Sfl1p | 10.5 | Transcriptional repressor and activator; involved in repression of flocculation-related genes, and activation of stress responsive genes; has direct role in INO1 transcriptional memory                                | ADE17, ADH5, ASG7, BAP3, CCW12, CCW14, CWP1, DDR2, DIA1, DRS2, ECL1, EDC2, FMP48, FRM2, GAS2, GCV2, GRE2, HIS4, HSP12, HSP32, HSP33, ICT1, IZH4, LDS2, LYS1, PHM7, PHO89, PIR3, PNS1, PRM10, PUN1, RCR1, ROQ1, RTA1, SIP18, SNO1, SNO4, SNQ2, SNZ1, TAT2, YDR034W-B, YER039C-A, YER053C-A, YGL258W-A, YGR066C, YJL107C, YJR115W, YLR108C, YMR244W, YOR385W, YPS5                   |
| Tbs1p | 6.2  | Putative transcription factor of unknown function                                                                                                                                                                       | COX7, CWP1, CYC1, FMP48, HSP12, LDS2, LYS20, PHM7, QCR9, RCH1, YGP1, YLR108C, YNL195C                                                                                                                                                                                                                                                                                              |
| Rof1p | 6.1  | Putative transcription factor containing a WOPR domain                                                                                                                                                                  | ASG7, CHS1, DIA1, EDC2, HXT2, IZH1, MRH1, NQM1, PUN1, RCR1, ROQ1, RPL43A, RPL6B, RTA1, STL1, YGL193C, YGP1, YHR033W, YJL045W, YLR108C, YMR244W, YOR385W, YPS5, YPS6                                                                                                                                                                                                                |
| Tog1p | 5.9  | Transcriptional activator of oleate genes; regulates genes involved in fatty acid utilization                                                                                                                           | CHS1, CLD1, GAD1, GAS2, GPD1, ICT1, IZH4, LDS2, PCK1, PGM2, PST1, QCR10, RCH1, ROQ1, SFK1, SNQ2, SYM1, TPS2, TSL1, YGP1, YMR181C                                                                                                                                                                                                                                                   |
| Wtm2p | 5.1  | Transcriptional modulator; involved in regulation of meiosis, silencing, and expression of RNR genes; involved in response to replication stress                                                                        | CHS1, GAD1, GPD1, GPI18, ICT1, IZH4, PGM2, PST1, PUN1, RCH1, SFK1, SYM1, TPS2, TSL1, YGP1, YLR108C, YMR181C                                                                                                                                                                                                                                                                        |
| Rpi1p | 4.8  | Transcription factor, allelic differences between S288C and Sigma1278b; mediates fermentation stress tolerance by modulating cell wall integrity                                                                        | CHS1, GAD1, GZF3, IZH4, KRE6, PGM2, PST1, PUN1, RCH1, RTA1, SFK1, SOL1, SYM1, TPS2, TSL1, YMR181C, YOR385W                                                                                                                                                                                                                                                                         |
| Com2p | 4.3  | Transcription factor; COM2 transcription is regulated by Haa1p, Sok2p and Zap1p transcriptional activators; C. albicans homolog (MNL1) plays a role in adaptation to stress                                             | CHS1, GAD1, GPD1, IZH4, PGM2, PST1, RCH1, RGL1, RTC3, SFK1, SNQ2, SYM1, TPS2, TSL1, YGP1, YMR181C                                                                                                                                                                                                                                                                                  |
| Sdd4p | 3.5  | Putative transcription factor, induced in response to the DNA-damaging agent MMS                                                                                                                                        | CCW14, GAD1, GPI18, MEP3, PST1, PUN1, RCH1, SFK1, VBA2, YGP1, YMR181C, YPL088W                                                                                                                                                                                                                                                                                                     |
