# Supplementary material for: Slow Adaptive Response of Budding Yeast Cells to Stable Conditions of Continuous Culture Can Occur without Genome Modifications
Source: Genes (Basel). 2020 Nov 27;11(12):1419. doi: 10.3390/genes11121419 (PMC7759791; doi:10.3390/genes11121419)
Supplement: Supplementary file 1 [file genes-11-01419-s001.zip › Table S3_revised.xlsx]

## Sheet: Data for all genes
id	Rep-1	Rep-2	Rep-3	Mean	SD	SD/Mean²	p-value	Mean fluorescence	ORF	Name	Alias	Feature type	Feature qualifier	Description
Q0010	2.0015	1.4765	1.6835	1.72	0.264448	0.089389	0.006134	261.435	Q0010	Q0010	ORF6	ORF	Dubious	Dubious open reading frame; unlikely to encode a protein, based on available experimental and comparative sequence data; partially overlaps the dubious ORF Q0017
Q0017	0.996	0.4925	1.105	0.864	0.326739	0.437697	0.005468	4975.23	Q0017	Q0017	ORF7	ORF	Dubious	Dubious open reading frame; unlikely to encode a protein, based on available experimental and comparative sequence data; partially overlaps the dubious ORF Q0010
Q0045	0.3205	0.1355	-0.383	0.024	0.364687	633.137	0.924919	604.868	Q0045	COX1	cytochrome c oxidase subunit 1|OXI3	ORF	Verified	Subunit I of cytochrome c oxidase (Complex IV); Complex IV is the terminal member of the mitochondrial inner membrane electron transport chain; one of three mitochondrially-encoded subunits
Q0050	0	0	2.049	2.049	1.18299	0.281772	1	358.938	Q0050	AI1	intron-encoded reverse transcriptase aI1	ORF	Verified	Reverse transcriptase required for splicing of the COX1 pre-mRNA; encoded by a mobile group II intron within the mitochondrial COX1 gene
Q0055	-1.463	-0.3915	-0.8725	-0.909	0.536682	0.649515	0.019656	1041.18	Q0055	AI2	intron-encoded reverse transcriptase aI2	ORF	Verified	Reverse transcriptase required for splicing of the COX1 pre-mRNA; encoded by a mobile group II intron within the mitochondrial COX1 gene
Q0060	0	0	0	0	0	0	1	199	Q0060	AI3	intron-encoded DNA endonuclease aI3|I-SceIII	ORF	Verified	Endonuclease I-SceIII; encoded by a mobile group I intron within the mitochondrial COX1 gene
Q0065	0	-1.05	-0.6335	-0.772	0.528724	0.887145	0.207586	283.75	Q0065	AI4	intron-encoded DNA endonuclease aI4|I-SceII	ORF	Verified	Endonuclease I-SceII; encoded by a mobile group I intron within the mitochondrial COX1 gene; intron is normally spliced by the BI4p maturase but AI4p can mutate to acquire the same maturase activity
Q0070	-1.606	-0.8415	-0.9165	-1.121	0.421405	0.335343	0.005526	1852.23	Q0070	AI5_ALPHA	intron-encoded DNA endonuclease aI5 alpha	ORF	Verified	Endonuclease I-SceIV; involved in intron mobility; encoded by a mobile group I intron within the mitochondrial COX1 gene
Q0075	0	0	-0.65	-0.65	0.375278	0.888231	1	231.389	Q0075	AI5_BETA	intron-encoded DNA endonuclease aI5 beta	ORF	Uncharacterized	Protein of unknown function; encoded within an intron of the mitochondrial COX1 gene; translational initiation codon is predicted to be ATA rather than ATG
Q0080	-0.6965	-1.221	0.027	-0.512	0.626639	2.39044	0.351308	275.789	Q0080	ATP8	F1F0 ATP synthase subunit 8|AAP1	ORF	Verified	Subunit 8 of the F0 sector of mitochondrial F1F0 ATP synthase; encoded on the mitochondrial genome; ATP8 and ATP6 mRNAs are not translated in the absence of the F1 sector of ATPase
Q0085	0.2735	0.157	-0.974	-0.181	0.68908	21.0336	0.626239	1021.81	Q0085	ATP6	F1F0 ATP synthase subunit a|PHO1|OLI4|OLI2	ORF	Verified	Subunit a of the F0 sector of mitochondrial F1F0 ATP synthase; mitochondrially encoded; translation is specifically activated by Atp22p; ATP6 and ATP8 mRNAs are not translated in the absence of the F1 sector of ATPase; mutations in human ortholog MT-ATP6 are associated with neurodegenerative disorders such as Neurogenic Ataxia and Retinitis Pigmentosa (NARP), Leigh syndrome (LS), Charcot-Marie-To…
Q0105	0.685	1.0835	0.115	0.628	0.486774	1.23426	0.050116	1837.48	Q0105	COB	cytochrome b|CYTB|COB1	ORF	Verified	Cytochrome b; mitochondrially encoded subunit of the ubiquinol-cytochrome c reductase complex which includes Cobp, Rip1p, Cyt1p, Cor1p, Qcr2p, Qcr6p, Qcr7p, Qcr8p, Qcr9p, and Qcr10p
Q0110	0	0	0.493	0.493	0.284634	1.1711	1	273.95	Q0110	BI2	cytochrome b mRNA maturase bI2	ORF	Verified	Mitochondrial mRNA maturase with a role in splicing; encoded by both exon and intron sequences of partially processed COB mRNA
Q0115	0	0	0.4755	0.476	0.27453	1.21165	0.59567	298.864	Q0115	BI3	cytochrome b mRNA maturase bI3	ORF	Verified	Mitochondrial mRNA maturase; forms a complex with Mrs1p to mediate splicing of the bI3 intron of the COB gene; encoded by both exon and intron sequences of partially processed COB mRNA
Q0120	0	0	1.189	1.189	0.686469	0.485576	1	235.3	Q0120	BI4	intron-encoded RNA maturase bI4	ORF	Verified	Mitochondrial mRNA maturase; forms a complex with Nam2p to mediate splicing of the bI4 intron of the COB gene; encoded by both exon and intron sequences of partially processed COB mRNA
Q0130	-0.495	0.415	-1.2855	-0.455	0.85095	4.11037	0.304184	48527.6	Q0130	OLI1	F0 ATP synthase subunit c|OLI3|ATP9	ORF	Verified	F0-ATP synthase subunit c (ATPase-associated proteolipid); encoded on the mitochondrial genome; mutation confers oligomycin resistance; expression is specifically dependent on the nuclear genes AEP1 and AEP2
Q0140	0	0	0	0	0	0	1	330.389	Q0140	VAR1	mitochondrial 37S ribosomal protein VAR1|VARI	ORF	Verified	Mitochondrial ribosomal protein of the small subunit; mitochondrially-encoded; polymorphic in different strains due to variation in number of AAT (asparagine) codons; translated near the mitochondrial inner membrane; may have a role in loss of mitochondrial DNA under stress conditions
Q0160	0	0	0	0	0	0	1	257.188	Q0160	SCEI	intron-encoded endonuclease I-SceI|I-SceIV|OMEGA	ORF	Verified	I-SceI DNA endonuclease; encoded by the mitochondrial group I intron of the 21S_rRNA gene; mediates gene conversion that propagates the intron into intron-less copies of the 21S_rRNA gene
Q0182	1.607	1.4015	1.083	1.364	0.264023	0.14191	0.001032	329.6	Q0182	Q0182	ORF11	ORF	Dubious	Dubious open reading frame; unlikely to encode a functional protein, based on available experimental and comparative sequence data
Q0250	1.701	1.2695	0.989	1.32	0.358659	0.205842	0.002448	370.034	Q0250	COX2	cytochrome c oxidase subunit 2|OXII|OXI1	ORF	Verified	Subunit II of cytochrome c oxidase (Complex IV); Complex IV is the terminal member of the mitochondrial inner membrane electron transport chain; one of three mitochondrially-encoded subunits
Q0255	-2.262	0	0	-2.262	1.30597	0.255239	1	8396.6	Q0255	Q0255	maturase-like protein|RF1|ORF1	ORF	Uncharacterized	Maturase-like protein
Q0275	1.497	0.9185	0.3025	0.906	0.597348	0.727731	0.036942	533.206	Q0275	COX3	cytochrome c oxidase subunit 3|OXI2	ORF	Verified	Subunit III of cytochrome c oxidase (Complex IV); Complex IV is the terminal member of the mitochondrial inner membrane electron transport chain; one of three mitochondrially-encoded subunits
Q0297	1.387	1.2955	0.8045	1.162	0.313252	0.231996	0.002427	784.132	Q0297	Q0297	ORF12	ORF	Dubious	Dubious open reading frame; unlikely to encode a functional protein, based on available experimental and comparative sequence data; partially overlaps the verified gene RPM1
YAL001C	-0.5085	-0.119	-0.1275	-0.252	0.222465	3.50316	0.078839	33969.9	YAL001C	TFC3	transcription factor TFIIIC subunit TFC3|tau 138|TSV115|FUN24	ORF	Verified	Subunit of RNA polymerase III transcription initiation factor complex; part of the TauB domain of TFIIIC that binds DNA at the BoxB promoter sites of tRNA and similar genes; cooperates with Tfc6p in DNA binding; largest of six subunits of the RNA polymerase III transcription initiation factor complex (TFIIIC)
YAL002W	-0.4645	-0.279	-0.1625	-0.302	0.152308	1.66997	0.019821	18124.2	YAL002W	VPS8	CORVET complex membrane-binding subunit VPS8|VPL8|VPT8|FUN15	ORF	Verified	Membrane-binding component of the CORVET complex; involved in endosomal vesicle tethering and fusion in the endosome to vacuole protein targeting pathway; interacts with Vps21p; contains RING finger motif
YAL003W	0.318	-0.323	-0.0745	-0.026	0.323185	478.084	0.899275	52886.2	YAL003W	EFB1	translation elongation factor 1 subunit beta|EF-1beta|eEF1Balpha|TEF5	ORF	Verified	Translation elongation factor 1 beta; stimulates nucleotide exchange to regenerate EF-1 alpha-GTP for the next elongation cycle; part of the EF-1 complex, which facilitates binding of aminoacyl-tRNA to the ribosomal A site; human homolog EEF1B2 can complement yeast efb1 mutants
YAL004W	0.535	0.38	0.2405	0.385	0.147318	0.993881	0.009861	6214.66	YAL004W	YAL004W		ORF	Dubious	Dubious open reading frame; unlikely to encode a functional protein, based on available experimental and comparative sequence data; completely overlaps verified gene SSA1/YAL005C
YAL005C	-0.6435	0.128	0.586	0.024	0.621376	1078.78	0.959686	53311.7	YAL005C	SSA1	Hsp70 family ATPase SSA1|YG100	ORF	Verified	ATPase involved in protein folding and NLS-directed nuclear transport; member of HSP70 family; required for ubiquitin-dependent degradation of short-lived proteins; forms chaperone complex with Ydj1p; localized to nucleus, cytoplasm, cell wall; 98% identical to paralog Ssa2p with different functional specificity in propagation of yeast [URE3] prions, vacuolar-mediated degradations of gluconeogene…
YAL007C	-0.727	0.516	-0.129	-0.113	0.621648	48.6842	0.744298	932.544	YAL007C	ERP2		ORF	Verified	Member of the p24 family involved in ER to Golgi transport; similar to Emp24p and Erv25p; role in misfolded protein quality control; forms a heterotrimeric complex with Erp1p, Emp24p, and Erv25p; localized to COPII-coated vesicles; ERP2 has a paralog, ERP4, that arose from the whole genome duplication
YAL008W	-0.228	-0.215	-0.642	-0.362	0.242863	1.85329	0.031111	40383.5	YAL008W	FUN14	MCP3	ORF	Verified	Integral mitochondrial outer membrane (MOM) protein; dosage suppressor of an MDM10 null that reduces ERMES-related phenotypes, such as alterations in mitochondrial morphology, protein complex assembly, and lipid profile; dosage suppressor of MDM12, MDM34, and MMM1 null mutant growth defects; novel mechanism of MOM import involving Tom70p, the TOM complex, and the TIM23 complex, requiring mitochon…
YAL009W	0.294	0.2815	0.1355	0.237	0.0881235	1.5689	0.014434	3223.47	YAL009W	SPO7	Nem1-Spo7 phosphatase regulatory subunit SPO7	ORF	Verified	Putative regulatory subunit of Nem1p-Spo7p phosphatase holoenzyme; regulates nuclear growth by controlling phospholipid biosynthesis, required for normal nuclear envelope morphology, premeiotic replication, and sporulation
YAL010C	-0.4415	-0.3765	-0.504	-0.441	0.0637541	0.327817	0.00159	2001.22	YAL010C	MDM10	FUN37	ORF	Verified	Subunit of both the ERMES and the SAM complex; component of ERMES complex which acts as a molecular tether between the mitochondria and the ER, necessary for efficient phospholipid exchange between organelles and for mitophagy; SAM/TOB complex component that functions in the assembly of outer membrane beta-barrel proteins; involved in mitochondrial inheritance and morphology; ERMES complex is oft…
YAL011W	0.3145	-0.0685	0.163	0.136	0.192887	10.4286	0.35724	2981.49	YAL011W	SWC3	SWC1	ORF	Verified	Protein of unknown function; component of the SWR1 complex, which exchanges histone variant H2AZ (Htz1p) for chromatin-bound histone H2A; required for formation of nuclear-associated array of smooth endoplasmic reticulum known as karmellae
YAL012W	0.0315	-0.921	-0.1645	-0.351	0.502985	4.08264	0.184652	42713.8	YAL012W	CYS3	cystathionine gamma-lyase CYS3|STR1|FUN35|CYI1	ORF	Verified	Cystathionine gamma-lyase; catalyzes one of the two reactions involved in the transsulfuration pathway that yields cysteine from homocysteine with the intermediary formation of cystathionine; protein abundance increases in response to DNA replication stress
YAL013W	-0.1785	0.387	0.9185	0.375	0.548588	3.90107	0.195746	47175.3	YAL013W	DEP1	Rpd3L histone deacetylase complex subunit DEP1|FUN54	ORF	Verified	Component of the Rpd3L histone deacetylase complex; required for diauxic shift-induced histone H2B deposition onto rDNA genes; transcriptional modulator involved in regulation of structural phospholipid biosynthesis genes and metabolically unrelated genes, as well as maintenance of telomeres, mating efficiency, and sporulation
YAL014C	-0.925	-0.35	-0.3635	-0.546	0.328149	1.10074	0.020505	20844.4	YAL014C	SYN8	syntaxin|SLT2|UIP2	ORF	Verified	Endosomal SNARE related to mammalian syntaxin 8
YAL015C	0.68	0.0625	0.233	0.325	0.318901	3.01918	0.080782	14631.9	YAL015C	NTG1	bifunctional N-glycosylase/AP lyase NTG1|ogg2|SCR1|FUN33	ORF	Verified	DNA N-glycosylase and apurinic/apyrimidinic (AP) lyase; involved in base excision repair; acts in both nucleus and mitochondrion; creates a double-strand break at mtDNA origins that stimulates replication in response to oxidative stress; required for maintaining mitochondrial genome integrity; NTG1 has a paralog, NTG2, that arose from the whole genome duplication
YAL016W	-0.4235	-0.0135	0.001	-0.145	0.241008	11.4629	0.375645	50354	YAL016W	TPD3	protein phosphatase 2A structural subunit TPD3|FUN32	ORF	Verified	Regulatory subunit A of the heterotrimeric PP2A complex; the heterotrimeric protein phosphatase 2A (PP2A) complex also contains regulatory subunit Cdc55p and either catalytic subunit Pph21p or Pph22p; required for cell morphogenesis and transcription by RNA polymerase III
YAL017W	-0.1685	-0.0015	-0.2265	-0.132	0.116818	6.7044	0.144618	18633.9	YAL017W	PSK1	serine/threonine protein kinase PSK1|FUN31	ORF	Verified	PAS domain-containing serine/threonine protein kinase; coordinately regulates protein synthesis and carbohydrate metabolism and storage in response to a unknown metabolite that reflects nutritional status; PSK1 has a paralog, PSK2, that arose from the whole genome duplication
YAL018C	1.837	-0.221	-0.025	0.681	1.13584	2.4492	0.530234	246.52	YAL018C	LDS1		ORF	Verified	Protein Involved in spore wall assembly; localizes to lipid droplets found on or outside of the prospore membrane; shares similarity with Lds2p and Rrt8p, and a strain mutant for all 3 genes exhibits reduced dityrosine fluorescence relative to the single mutants
YAL019W	-0.617	-0.575	-0.2605	-0.484	0.194836	0.831723	0.012166	6075.82	YAL019W	FUN30	DNA-dependent ATPase FUN30	ORF	Verified	Snf2p family member with ATP-dependent chromatin remodeling activity; has a role in silencing at the mating type locus, telomeres and centromeres; enriched at centromeres and is required for correct chromatin structure around centromeres, as well as at the boundary element of the silent HMR; recruited to DNA double-strand breaks (DSBs) where it promotes 5' strand resection of DSBs; potential Cdc2…
YAL020C	0.154	0.147	0.7325	0.345	0.336036	2.82324	0.082238	26503.8	YAL020C	ATS1	KTI13|FUN28	ORF	Verified	Protein required for modification of wobble nucleosides in tRNA; acts with Elongator complex, Kti11p, and Kti12p; has a potential role in regulatory interactions between microtubules and the cell cycle; forms a stable heterodimer with Kti11p
YAL021C	-1.74	-0.091	-0.1555	-0.662	0.933988	2.13121	0.181717	8102.43	YAL021C	CCR4	CCR4-NOT core exoribonuclease subunit CCR4|NUT21|FUN27	ORF	Verified	Component of the CCR4-NOT transcriptional complex; CCR4-NOT is involved in regulation of gene expression; component of the major cytoplasmic deadenylase, which is involved in mRNA poly(A) tail shortening
YAL022C	0.4615	0.2985	0.57	0.443	0.136659	0.696353	0.002716	45199.2	YAL022C	FUN26	nucleoside transmembrane transporter FUN26	ORF	Verified	High affinity, broad selectivity, nucleoside/nucleobase transporter; vacuolar membrane localized transporter which may regulate the balance of nicotinamide riboside (NmR) levels between the cytosol and vacuole, contributing to salvage of NmR for use in cytosolic NAD+ synthesis; equilibrative nucleoside transporter (ENT) family member
YAL023C	-0.1615	0.3085	0.4235	0.19	0.309933	8.5854	0.265219	42221.8	YAL023C	PMT2	dolichyl-phosphate-mannose-protein mannosyltransferase PMT2|FUN25	ORF	Verified	Protein O-mannosyltransferase of the ER membrane; transfers mannose residues from dolichyl phosphate-D-mannose to protein serine/threonine residues; involved in ER quality control; acts in a complex with Pmt1p, can instead interact with Pmt5p; antifungal drug target; PMT2 has a paralog, PMT3, that arose from the whole genome duplication
YAL024C	-0.064	0.29	0.1995	0.142	0.183911	9.12074	0.197095	3612.49	YAL024C	LTE1	mitotic regulator LTE1|MSI2	ORF	Verified	Protein similar to GDP/GTP exchange factors; without detectable GEF activity; required for asymmetric localization of Bfa1p at daughter-directed spindle pole bodies and for mitotic exit at low temperatures
YAL025C	0.8115	-0.154	0.393	0.35	0.484173	3.95243	0.172461	9372.91	YAL025C	MAK16	ribosome biosynthesis protein MAK16	ORF	Verified	Essential nuclear protein; constituent of 66S pre-ribosomal particles; required for maturation of 25S and 5.8S rRNAs; required for maintenance of M1 satellite double-stranded RNA of the L-A virus
YAL026C	-0.794	-1.1255	-1.0605	-0.993	0.17566	0.178146	0.001103	6350.35	YAL026C	DRS2	aminophospholipid-translocating P4-type ATPase DRS2|SWA3|FUN38	ORF	Verified	Trans-golgi network aminophospholipid translocase (flippase); maintains membrane lipid asymmetry in post-Golgi secretory vesicles; contributes to clathrin-coated vesicle formation, endocytosis, protein trafficking between the Golgi and endosomal system and the cellular response to mating pheromone; autoinhibited by its C-terminal tail; localizes to the trans-Golgi network; mutations in human homo…
YAL027W	0.5505	0.284	0.13	0.321	0.212743	2.06465	0.026384	8263.74	YAL027W	SAW1	DNA-binding protein SAW1	ORF	Verified	5'- and 3'-flap DNA binding protein; recruits Rad1p-Rad10p to single-strand annealing intermediates with 3' non-homologous tails for removal during double-strand break repair; complexes with Rad1p-Rad10p and stimulates its endonuclease activity; green fluorescent protein (GFP)-fusion protein localizes to the nucleus
YAL028W	-0.3035	0.048	0.113	-0.048	0.224072	97.2535	0.727174	2750.74	YAL028W	FRT2	HPH2	ORF	Verified	Tail-anchored ER membrane protein of unknown function; interacts with homolog Frt1p; promotes growth in conditions of high Na+, alkaline pH, or cell wall stress, possibly via a role in posttranslational translocation; potential Cdc28p substrate; FRT2 has a paralog, FRT1, that arose from the whole genome duplication
YAL029C	0.1905	0.129	0.179	0.166	0.0326968	1.18656	0.012369	5417.41	YAL029C	MYO4	myosin 4|SHE1|FUN22	ORF	Verified	Type V myosin motor involved in actin-based transport of cargos; required for mRNA transport, including ASH1 mRNA, and facilitating the growth and movement of ER tubules into the growing bud along with She3p; MYO4 has a paralog, MYO2, that arose from the whole genome duplication
YAL030W	0.4845	-0.0165	-0.4605	0.003	0.472786	52531.8	1	18022.6	YAL030W	SNC1	SNAP receptor SNC1	ORF	Verified	Vesicle membrane receptor protein (v-SNARE); involved in the fusion between Golgi-derived secretory vesicles with the plasma membrane; proposed to be involved in endocytosis; member of the synaptobrevin/VAMP family of R-type v-SNARE proteins; SNC1 has a paralog, SNC2, that arose from the whole genome duplication
YAL031C	-0.5105	-0.5135	-0.599	-0.541	0.0502519	0.171695	0.002567	8113.47	YAL031C	GIP4	protein phosphatase regulator GIP4|FUN21	ORF	Verified	Cytoplasmic protein that regulates protein phosphatase 1 Glc7p; protein overexpression relocalizes Glc7p from the nucleus and prevents chromosome segregation; potential Cdc28p substrate
YAL032C	0.439	0.294	0.2445	0.326	0.101082	0.951128	0.008793	13421.8	YAL032C	PRP45	mRNA splicing protein PRP45|FUN20	ORF	Verified	Protein required for pre-mRNA splicing; associates with the spliceosome and interacts with splicing factors Prp22p and Prp46p; orthologous to human transcriptional coactivator SKIP and can activate transcription of a reporter gene
YAL033W	0.986	0.6525	0.1945	0.611	0.397379	1.06444	0.035756	1289.6	YAL033W	POP5	RNA-binding protein POP5|FUN53	ORF	Verified	Subunit of both RNase MRP and nuclear RNase P; RNase MRP cleaves pre-rRNA, while nuclear RNase P cleaves tRNA precursors to generate mature 5' ends and facilitates turnover of nuclear RNAs
YAL034C	-0.266	-0.2675	-0.218	-0.25	0.0281558	0.450493	0.003032	46529.3	YAL034C	FUN19		ORF	Verified	Non-essential protein of unknown function; expression induced in response to heat stress; FUN19 has a paralog, YOR338W, that arose from the whole genome duplication
YAL034C-B	0	0	1.663	1.663	0.960133	0.347174	1	600.188	YAL034C-B	YAL034C-B	YAL035C-A	ORF	Dubious	Dubious open reading frame; unlikely to encode a functional protein, based on available experimental and comparative sequence data
YAL034W-A	1.202	0.6575	0.4765	0.779	0.377622	0.622275	0.01503	604.294	YAL034W-A	MTW1	MIND complex subunit MTW1|NSL2|DSN3	ORF	Verified	Essential component of the MIND kinetochore complex; joins kinetochore subunits contacting DNA to those contacting microtubules; critical to kinetochore assembly; complex consists of Mtw1p Including Nnf1p-Nsl1p-Dsn1p (MIND)
YAL035W	-0.128	-0.0555	0.2325	0.016	0.190683	744.856	0.913439	44132.1	YAL035W	FUN12	translation initiation factor eIF5B|eIF5B|yIF2	ORF	Verified	Translation initiation factor eIF5B; GTPase that promotes Met-tRNAiMet binding to ribosomes and ribosomal subunit joining; promotes GTP-dependent maturation of 18S rRNA by Nob1p; protein abundance increases in response to DNA replication stress; homolog of bacterial IF2
YAL036C	0.0985	-0.419	-0.129	-0.15	0.259378	11.5279	0.261836	16233	YAL036C	RBG1	GTP-binding protein RBG1|FUN11	ORF	Verified	Member of the DRG family of GTP-binding proteins; associates with translating ribosomes; interacts with Tma46p, Ygr250cp, Gir2p and Yap1p via two-hybrid
YAL037W	0.85	0.766	0.6245	0.747	0.113965	0.204236	0.001329	1543.06	YAL037W	YAL037W		ORF	Uncharacterized	Putative protein of unknown function; YAL037W has a paralog, YOR342C, that arose from the whole genome duplication
YAL038W	-0.953	-0.5645	-0.7405	-0.753	0.194536	0.343091	0.015975	45547	YAL038W	CDC19	pyruvate kinase CDC19|PYK1	ORF	Verified	Pyruvate kinase; functions as a homotetramer in glycolysis to convert phosphoenolpyruvate to pyruvate, the input for aerobic (TCA cycle) or anaerobic (glucose fermentation) respiration; regulated via allosteric activation by fructose bisphosphate; CDC19 has a paralog, PYK2, that arose from the whole genome duplication
YAL039C	0.03	-0.2185	0.245	0.019	0.231952	642.525	0.892407	38762.9	YAL039C	CYC3	holocytochrome c synthase CYC3|CCHL	ORF	Verified	Cytochrome c heme lyase (holocytochrome c synthase); attaches heme to apo-cytochrome c (Cyc1p or Cyc7p) in mitochondrial intermembrane space; human homolog HCCS implicated in microphthalmia with linear skin defects (MLS), and can complement yeast null mutant
YAL040C	-0.5895	-1.2095	-0.682	-0.827	0.334468	0.489039	0.0068	828.676	YAL040C	CLN3	cyclin CLN3|WHI1|FUN10|DAF1	ORF	Verified	G1 cyclin involved in cell cycle progression; activates Cdc28p kinase to promote G1 to S phase transition; plays a role in regulating transcription of other G1 cyclins, CLN1 and CLN2; regulated by phosphorylation and proteolysis; acetyl-CoA induces CLN3 transcription in response to nutrient repletion to promote cell-cycle entry; cell cycle arrest phenotype of the cln1 cln2 cln3 triple null mutant…
YAL041W	-0.311	-0.275	-0.2845	-0.29	0.018657	0.221843	0.000786	9250.28	YAL041W	CDC24	Rho family guanine nucleotide exchange factor CDC24|CLS4	ORF	Verified	Guanine nucleotide exchange factor (GEF) for Cdc42p; required for polarity establishment and maintenance, and mutants have morphological defects in bud formation and shmooing; relocalizes from nucleus to cytoplasm upon DNA replication stress; thermosensitivity of the cdc24-4 mutant in the presence of sorbitol is functionally complemented by human CDC42
YAL042C-A	0.7275	0.029	0.2225	0.327	0.360641	3.37271	0.24601	378.515	YAL042C-A	YAL042C-A	YAL043C-A	ORF	Dubious	Dubious open reading frame; unlikely to encode a functional protein, based on available experimental and comparative sequence data; partially overlaps verified ORF ERV46/YAL042W; YAL042C-A is a non-essential gene
YAL042W	-0.0045	0.0455	0.4125	0.151	0.227698	9.98631	0.231986	54338.8	YAL042W	ERV46	FUN9	ORF	Verified	Protein localized to COPII-coated vesicles; forms a complex with Erv41p; involved in the membrane fusion stage of transport
YAL043C	-0.353	-0.2505	0.014	-0.197	0.189365	4.87942	0.192993	36348.7	YAL043C	PTA1	RNA-processing protein PTA1|FUN39	ORF	Verified	Subunit of holo-CPF; holo-CPF is a multiprotein complex and functional homolog of mammalian CPSF, required for the cleavage and polyadenylation of mRNA and snoRNA 3' ends; involved in pre-tRNA processing; binds to the phosphorylated CTD of RNAPII
YAL044C	0.1515	-0.7475	-0.6175	-0.405	0.485878	2.96222	0.128805	50543.5	YAL044C	GCV3	glycine decarboxylase subunit H	ORF	Verified	H subunit of the mitochondrial glycine decarboxylase complex; glycine decarboxylase is required for the catabolism of glycine to 5,10-methylene-THF; also required for all protein lipoylation; expression is regulated by levels of 5,10-methylene-THF
YAL044W-A	0.0835	-0.452	-0.6255	-0.331	0.369582	3.3733	0.107635	8037.6	YAL044W-A	BOL1		ORF	Verified	Mitochondrial matrix protein involved in Fe-S cluster biogenesis; facilitates [4Fe-2S] cluster inception into mitochondrial proteins such as lipoate synthase and succinate dehydrogenase; interacts and may function with Grx5p at an early step in Fe-S cluster biosynthesis; forms dimeric complexes with Grx5p and Nfu1p that alter the stability of shared Fe/S clusters; sequence similarity to human BOL…
YAL045C	3.506	-1.182	-0.2065	0.478	2.47358	10.8261	0.767259	316.725	YAL045C	YAL045C		ORF	Dubious	Dubious open reading frame; unlikely to encode a functional protein, based on available experimental and comparative sequence data; almost completely overlaps YAL044W-A
YAL046C	0.654	0.0015	0.369	0.341	0.327118	2.81317	0.088072	22677.5	YAL046C	BOL3	AIM1	ORF	Verified	Protein involved in Fe-S cluster transfer to mitochondrial clients; protects [4Fe-4S] clusters from damage due to oxidative stress by acting along with Nfu1p at a late step in the transfer of [4Fe-4S] clusters from the ISA complex to mitochondrial client proteins like lipoate synthase and succinate dehydrogenase; sequence similarity to human BOLA family member, BOLA3, mutations of which are assoc…
YAL047C	0.395	0.2995	0.54	0.411	0.121096	0.71688	0.019993	7038.29	YAL047C	SPC72	gamma-tubulin complex subunit SPC72|LDB4	ORF	Verified	Gamma-tubulin small complex (gamma-TuSC) receptor; recruits the gamma-TuSC complex to the cytoplasmic side of the SPB, connecting nuclear microtubules to the SPB; involved in astral microtubule formation, stabilization, and with Stu2p, anchoring astral MTs at the cytoplasmic face of the SPB, and regulating plus-end MT dynamics; regulated by Cdc5 kinase
YAL048C	-0.5045	0.345	0.5695	0.137	0.566499	30.1827	0.653536	10441.9	YAL048C	GEM1	ERMES complex Ca(2+)-binding regulatory GTPase GEM1|GON1	ORF	Verified	Outer mitochondrial membrane GTPase, subunit of the ERMES complex; potential regulatory subunit of the ERMES complex that links the ER to mitochondria and may promote inter-organellar calcium and phospholipid exchange as well as coordinating mitochondrial DNA replication and growth; cells lacking Gem1p contain collapsed, globular, or grape-like mitochondria; ortholog of metazoan Miro GTPases
YAL049C	0.5585	0.1695	0.0175	0.249	0.279018	4.50022	0.114482	32460.8	YAL049C	AIM2	protein AIM2	ORF	Verified	Cytoplasmic protein involved in mitochondrial function or organization; null mutant displays reduced frequency of mitochondrial genome loss; potential Hsp82p interactor
YAL051W	-1.0785	-0.562	-0.5225	-0.721	0.310233	0.596785	0.009655	25613.8	YAL051W	OAF1	oleate-activated transcription factor OAF1|YAF1	ORF	Verified	Oleate-activated transcription factor; subunit of a heterodimeric complex with Pip2p, which binds to oleate-response elements (ORE) in the promoter of genes involved in beta-oxidation of fatty acids, peroxisome organization and biogenesis, activating transcription in the presence of oleate; regulates chromatin silencing at telomeres; involved in diauxic shift; OAF1 has a paralog, PIP2, that arose…
YAL053W	-0.19	-0.38	-0.4105	-0.327	0.119478	1.11736	0.007036	26970.4	YAL053W	FLC2	flavin adenine dinucleotide transporter FLC2|HUF2	ORF	Verified	Putative calcium channel involved in calcium release under hypotonic stress; required for uptake of FAD into endoplasmic reticulum; involved in cell wall maintenance; FLC2 has a paralog, YOR365C, that arose from the whole genome duplication
YAL054C	-0.546	0.627	1.1205	0.4	0.856027	5.35017	0.353061	11198.5	YAL054C	ACS1	acetate--CoA ligase 1|FUN44	ORF	Verified	Acetyl-coA synthetase isoform; along with Acs2p, acetyl-coA synthetase isoform is the nuclear source of acetyl-coA for histone acetylation; expressed during growth on nonfermentable carbon sources and under aerobic conditions
YAL055W	0.2745	0.1655	-0.223	0.072	0.261508	50.4453	0.684153	23028.8	YAL055W	PEX22	ubiquitin-protein transferase activating protein PEX22|YAF5	ORF	Verified	Putative peroxisomal membrane protein; required for import of peroxisomal proteins; functionally complements a Pichia pastoris pex22 mutation
YAL056C-A	0	0	0.5625	0.562	0.32476	1.02823	0.425443	427	YAL056C-A	YAL056C-A	YAL058C-A	ORF	Dubious	Dubious open reading frame; unlikely to encode a functional protein, based on available experimental and comparative sequence data
YAL056W	-0.096	0.217	0.1735	0.098	0.169554	17.6545	0.367061	35398.1	YAL056W	GPB2	KRH1	ORF	Verified	Multistep regulator of cAMP-PKA signaling; inhibits PKA downstream of Gpa2p and Cyr1p, thereby increasing cAMP dependency; inhibits Ras activity through direct interactions with Ira1p/2p; regulated by G-alpha protein Gpa2p; GPB2 has a paralog, GPB1, that arose from the whole genome duplication
YAL058W	0.6565	0.1705	0.1935	0.34	0.274194	2.37192	0.055703	1422.84	YAL058W	CNE1	calnexin|FUN48	ORF	Verified	Calnexin; integral membrane ER chaperone involved in folding and quality control of glycoproteins; chaperone activity is inhibited by Mpd1p, with which Cne1p interacts; 24% identical to mammalian calnexin; Ca+ binding not yet shown in yeast
YAL059W	-0.991	-1.017	-1.234	-1.081	0.133425	0.114179	0.000318	6199	YAL059W	ECM1		ORF	Verified	Pre-ribosomal factor involved in 60S ribosomal protein subunit export; associates with the pre-60S particle; shuttles between the nucleus and cytoplasm
YAL060W	0.6225	0.3705	0.569	0.521	0.132771	0.489133	0.002766	53006.1	YAL060W	BDH1	(R,R)-butanediol dehydrogenase|BDH	ORF	Verified	NAD-dependent (R,R)-butanediol dehydrogenase; catalyzes oxidation of (R,R)-2,3-butanediol to (3R)-acetoin, oxidation of meso-butanediol to (3S)-acetoin, and reduction of acetoin; enhances use of 2,3-butanediol as an aerobic carbon source
YAL061W	-1.044	-0.224	-0.7695	-0.679	0.417397	0.905336	0.022838	25933.9	YAL061W	BDH2	putative dehydrogenase BDH2	ORF	Uncharacterized	Putative medium-chain alcohol dehydrogenase with similarity to BDH1; transcription induced by constitutively active PDR1 and PDR3
YAL062W	-2.0935	-1.803	-0.4425	-1.446	0.881396	0.421536	0.020595	38552.2	YAL062W	GDH3	glutamate dehydrogenase (NADP(+)) GDH3|FUN51	ORF	Verified	NADP(+)-dependent glutamate dehydrogenase; synthesizes glutamate from ammonia and alpha-ketoglutarate; rate of alpha-ketoglutarate utilization differs from Gdh1p; expression regulated by nitrogen and carbon sources; GDH3 has a paralog, GDH1, that arose from the whole genome duplication
YAL063C	0	0	0.1995	0.2	0.115181	2.87953	0.557917	539.211	YAL063C	FLO9	flocculin FLO9	ORF	Verified	Lectin-like protein with similarity to Flo1p; thought to be expressed and involved in flocculation
YAL064C-A	1.113	-0.165	0.564	0.638	0.641109	1.57504	0.13672	333.104	YAL064C-A	TDA8	YAL065C-A	ORF	Uncharacterized	Putative protein of unknown function; null mutant is sensitive to expression of the top1-T722A allele; not an essential gene
YAL064W	-1.008	-0.9275	-0.6865	-0.874	0.167294	0.219007	0.003029	845.691	YAL064W	YAL064W		ORF	Verified	Protein of unknown function; may interact with ribosomes, based on co-purification experiments
YAL064W-B	0.5965	0.7595	0.0015	0.452	0.39899	1.95292	0.104509	504.379	YAL064W-B	YAL064W-B		ORF	Uncharacterized	Fungal-specific protein of unknown function
YAL065C	0.02	-1.34	-0.0405	-0.35	0.768327	6.27206	0.472395	468.929	YAL065C	YAL065C		ORF	Uncharacterized	Putative protein of unknown function; shows sequence similarity to FLO1 and other flocculins
YAL066W	0	0	0.506	0.506	0.292139	1.14101	1	389.071	YAL066W	YAL066W		ORF	Dubious	Dubious open reading frame; unlikely to encode a functional protein, based on available experimental and comparative sequence data
YAL067C	0.776	1.6595	1.5785	1.338	0.488388	0.272806	0.00525	41288.8	YAL067C	SEO1	putative permease SEO1	ORF	Verified	Putative permease; member of the allantoate transporter subfamily of the major facilitator superfamily; mutation confers resistance to ethionine sulfoxide
YAL068C	-0.492	-0.3835	-0.385	-0.42	0.062214	0.352687	0.003954	9297.04	YAL068C	PAU8	seripauperin PAU8	ORF	Verified	Protein of unknown function; member of the seripauperin multigene family encoded mainly in subtelomeric regions
YAL069W	1.577	0.6935	0.723	0.998	0.50179	0.503803	0.016498	1266.98	YAL069W	YAL069W		ORF	Dubious	Dubious open reading frame; unlikely to encode a functional protein, based on available experimental and comparative sequence data
YAR002C-A	-0.2755	-0.2925	-0.6015	-0.39	0.183506	1.20648	0.011263	1557.98	YAR002C-A	ERP1		ORF	Verified	Member of the p24 family involved in ER to Golgi transport; role in misfolded protein quality control; forms heterotrimeric complex with Erp2p, Emp24p, and Erv25p; localized to COPII-coated vesicles; ERP1 has a paralog, ERP6, that arose from the whole genome duplication
YAR002W	-0.0165	-0.033	0.2345	0.062	0.149905	38.9972	0.534763	11311.8	YAR002W	NUP60	FG-nucleoporin NUP60	ORF	Verified	FG-nucleoporin component of central core of the nuclear pore complex; contributes directly to nucleocytoplasmic transport and maintenance of the nuclear pore complex (NPC) permeability barrier and is involved in gene tethering at the nuclear periphery; relocalizes to the cytosol in response to hypoxia; both NUP1 and NUP60 are homologous to human NUP153
YAR003W	-0.7445	-0.294	-0.1685	-0.402	0.302896	1.87431	0.037973	10923.4	YAR003W	SWD1	COMPASS subunit protein SWD1|SAF49|CPS50|FUN16	ORF	Verified	Subunit of the COMPASS (Set1C) complex; COMPASS methylates histone H3 on lysine 4 and is required in transcriptional silencing near telomeres; WD40 beta propeller superfamily member with similarity to mammalian Rbbp7
YAR007C	0.6155	0.705	0.6705	0.664	0.0451396	0.102382	0.000223	17652.9	YAR007C	RFA1	replication factor A subunit protein RFA1|RPA70|RPA1|FUN3|BUF2	ORF	Verified	Subunit of heterotrimeric Replication Protein A (RPA); RPA is a highly conserved single-stranded DNA binding protein involved in DNA replication, repair, and recombination; RPA protects against inappropriate telomere recombination, and upon telomere uncapping, prevents cell proliferation by a checkpoint-independent pathway; role in DNA catenation/decatenation pathway of chromosome disentangling; …
YAR008W	1.322	1.1585	1.207	1.229	0.0839737	0.0555955	0.000104	6630.84	YAR008W	SEN34	tRNA splicing endonuclease subunit SEN34|FUN4	ORF	Verified	Subunit of the tRNA splicing endonuclease; tRNA splicing endonuclease (Sen complex) is composed of Sen2p, Sen15p, Sen34p, and Sen54p; Sen complex also cleaves the CBP1 mRNA at the mitochondrial surface; Sen34p contains the active site for tRNA 3' splice site cleavage and has similarity to Sen2p and to Archaeal tRNA splicing endonuclease
YAR014C	-0.314	-0.0765	0.116	-0.092	0.215392	25.448	0.425001	25117.7	YAR014C	BUD14	protein phosphatase regulator BUD14	ORF	Verified	Protein involved in bud-site selection; Bud14p-Glc7p complex is a cortical regulator of dynein; forms a complex with Kel1p and Kel2p that regulates Bnr1p (formin) to affect actin cable assembly, cytokinesis, and polarized growth; diploid mutants display a random budding pattern instead of the wild-type bipolar pattern; relative distribution to the nucleus increases upon DNA replication stress
YAR015W	0.09	-0.3845	-0.0085	-0.101	0.250409	24.5475	0.421229	13282.6	YAR015W	ADE1	phosphoribosylaminoimidazolesuccinocarboxamide synthase	ORF	Verified	N-succinyl-5-aminoimidazole-4-carboxamide ribotide synthetase; required for 'de novo' purine nucleotide biosynthesis; red pigment accumulates in mutant cells deprived of adenine; protein abundance increases in response to DNA replication stress
YAR018C	0.647	0.322	0.5685	0.513	0.169583	0.644387	0.003403	964.132	YAR018C	KIN3	serine/threonine protein kinase KIN3|NPK1|FUN52	ORF	Verified	Nonessential serine/threonine protein kinase; possible role in DNA damage response; influences tolerance to high levels of ethanol
YAR019C	-1.088	-0.4395	-0.673	-0.733	0.328456	0.611321	0.009365	3319.79	YAR019C	CDC15	serine/threonine protein kinase CDC15|LYT1	ORF	Verified	Protein kinase of the Mitotic Exit Network; localized to the spindle pole bodies at late anaphase; promotes mitotic exit by directly switching on the kinase activity of Dbf2p; required for spindle disassembly after meiosis II; relocalizes to the cytoplasm upon DNA replication stress
YAR020C	-0.1795	0.06	-0.155	-0.092	0.131773	15.5687	0.286891	15784.5	YAR020C	PAU7	seripauperin PAU7	ORF	Verified	Member of the seripauperin multigene family; active during alcoholic fermentation, regulated by anaerobiosis, inhibited by oxygen, repressed by heme
YAR023C	-0.1525	0.0745	-0.2755	-0.118	0.177557	12.7518	0.243126	3260.32	YAR023C	YAR023C	DUP240 family protein	ORF	Uncharacterized	Putative integral membrane protein; member of DUP240 gene family
YAR027W	0.408	0.7355	0.138	0.427	0.299211	1.64105	0.030628	23476.7	YAR027W	UIP3	DUP240 family protein UIP3	ORF	Verified	Putative integral membrane protein of unknown function; interacts with Ulp1p at the nuclear periphery; member of DUP240 gene family
YAR028W	0.283	0.1835	-0.151	0.105	0.227357	20.6219	0.397834	1900.53	YAR028W	YAR028W	DUP240 family protein	ORF	Uncharacterized	Putative integral membrane protein; member of DUP240 gene family; GFP-fusion protein is induced in response to the DNA-damaging agent MMS
YAR029W	-0.1975	-0.3675	-0.108	-0.224	0.131815	2.62704	0.028953	1167.29	YAR029W	YAR029W	DUP240 family protein	ORF	Uncharacterized	Member of DUP240 gene family but contains no transmembrane domains; green fluorescent protein (GFP)-fusion protein localizes to the cytoplasm in a punctate pattern
YAR030C	0.0735	0.4825	0.4415	0.333	0.225235	2.03118	0.030715	2140.53	YAR030C	YAR030C		ORF	Dubious	Dubious open reading frame; unlikely to encode a functional protein, based on available experimental and comparative sequence data; partially overlaps the uncharacterized ORF YAR029W and the verified gene PRM9
YAR031W	0	0	0.9765	0.976	0.563783	0.59185	0.735991	338.118	YAR031W	PRM9	pheromone-regulated DUP240 family protein PRM9	ORF	Verified	Pheromone-regulated protein; contains 3 predicted transmembrane segments and an FF sequence, a motif involved in COPII binding; member of DUP240 gene family; PRM9 has a paralog, PRM8, that arose from a segmental duplication
YAR033W	-0.6875	-0.015	-0.6605	-0.454	0.380713	1.84708	0.09943	609.221	YAR033W	MST28	DUP240 family protein MST28	ORF	Verified	Putative integral membrane protein, involved in vesicle formation; forms complex with Mst27p; member of DUP240 gene family; binds COPI and COPII vesicles; MST28 has a paralog, MST27, that arose from a segmental duplication
YAR035W	-0.098	0.076	2.029	0.669	1.181	2.63875	0.281784	47511.3	YAR035W	YAT1	carnitine O-acetyltransferase YAT1	ORF	Verified	Outer mitochondrial carnitine acetyltransferase; minor ethanol-inducible enzyme involved in transport of activated acyl groups from the cytoplasm into the mitochondrial matrix; phosphorylated
YAR042W	-0.6915	0.218	0.1695	-0.101	0.511674	50.1592	0.770375	569.309	YAR042W	SWH1	probe inside gene and almost no signal from this probe because the gene is long, over 3500 bp; oxysterol-binding protein related protein SWH1|OSH1|YAR044W	ORF	Verified	Protein similar to mammalian oxysterol-binding protein; contains ankyrin repeats and FFAT motif; interacts with ER anchor Scs2p at the nucleus-vacuole junction; regulated by sterol binding; SWH1 has a paralog, OSH2, that arose from the whole genome duplication
YAR044W	-0.124	-0.0625	0.17	-0.006	0.155067	4307.41	0.964476	13660.9	YAR042W	SWH1	probe close to 3'; oxysterol-binding protein related protein SWH1|OSH1|YAR044W	ORF	Verified	Protein similar to mammalian oxysterol-binding protein; contains ankyrin repeats and FFAT motif; interacts with ER anchor Scs2p at the nucleus-vacuole junction; regulated by sterol binding; SWH1 has a paralog, OSH2, that arose from the whole genome duplication
YAR047C	0	0	0	0	0	0	1	354.2	YAR047C	YAR047C		ORF	Dubious	Dubious open reading frame; unlikely to encode a functional protein, based on available experimental and comparative sequence data
YAR050W	0.7015	0.45	0.8035	0.652	0.181943	0.427995	0.002231	1708.09	YAR050W	FLO1	flocculin FLO1|FLO4|FLO2	ORF	Verified	Lectin-like protein involved in flocculation; cell wall protein that binds mannose chains on the surface of other cells, confers floc-forming ability that is chymotrypsin sensitive and heat resistant; important for co-flocculation with other yeasts, mediating interaction with specific species; FLO1 has a paralog, FLO5, that arose from a segmental duplication
YAR053W	0.799	0.1905	0.303	0.431	0.323765	1.74291	0.173799	419.844	YAR053W	YAR053W		ORF	Dubious	Dubious open reading frame; unlikely to encode a functional protein, based on available experimental and comparative sequence data
YAR060C	0.027	0.7495	0.9515	0.576	0.486057	1.46502	0.058784	12000.2	YAR060C	YAR060C		ORF	Dubious	Dubious open reading frame; unlikely to encode a functional protein, based on available experimental and comparative sequence data; YAR060C has a paralog, YHR212C, that arose from a segmental duplication
YAR061W	1.348	1.9295	1.7325	1.735	0.295745	0.0982469	0.033469	399.419	YAR061W	YAR061W	YAR062W	pseudogene	pseudogene	Pseudogenic fragment with similarity to flocculins; YAR061W has a paralog, YHR212W-A, that arose from a segmental duplication
YAR062W	1.437	1.556	1.6825	1.559	0.122769	0.0505123	0.000127	2478.96	YAR061W	YAR061W	probe close to 3' with higher signal; YAR062W	pseudogene	pseudogene	Pseudogenic fragment with similarity to flocculins; YAR061W has a paralog, YHR212W-A, that arose from a segmental duplication
YAR064W	0.8095	1.697	-0.125	0.794	0.911101	1.44519	0.128399	323.467	YAR064W	YAR064W		ORF	Uncharacterized	Pseudogenic fragment with similarity to flocculins; YAR064W has a paralog, YHR213W-B, that arose from a segmental duplication
YAR066W	1.689	0.6785	0.709	1.026	0.57481	0.546047	0.031786	462.183	YAR066W	YAR066W		ORF	Uncharacterized	Putative GPI protein; SWAT-GFP and mCherry fusion proteins localize to the endoplasmic reticulum and vacuole respectively; YAR066W has a paralog, YHR214W, that arose from a segmental duplication
YAR068W	0.986	0.743	0.524	0.751	0.231104	0.409758	0.01565	1466.09	YAR068W	YAR068W		ORF	Uncharacterized	Fungal-specific protein of unknown function; induced in respiratory-deficient cells; YAR068W has a paralog, YHR214W-A, that arose from a segmental duplication
YAR069C	0.743	0.946	0.2105	0.633	0.379852	0.947997	0.026979	442.941	YAR069C	YAR069C		ORF	Dubious	Dubious open reading frame; unlikely to encode a protein, based on available experimental and comparative sequence data; YAR069C has a paralog, YHR214C-D, that arose from a segmental duplication
YAR070C	1.571	0	0.357	0.964	0.823538	0.886195	0.459506	292.632	YAR070C	YAR070C		ORF	Dubious	Dubious open reading frame; unlikely to encode a protein, based on available experimental and comparative sequence data; YAR070C has a paralog, YHR214C-B, that arose from a segmental duplication
YAR071W	-0.6075	-0.3595	-0.448	-0.472	0.125682	0.564145	0.002187	7339.37	YAR071W	PHO11	acid phosphatase PHO11	ORF	Verified	One of three repressible acid phosphatases; glycoprotein that is transported to the cell surface by the secretory pathway; induced by phosphate starvation and coordinately regulated by PHO4 and PHO2; PHO11 has a paralog, PHO12, that arose from a segmental duplication
YAR073W	0.731	0.5525	0.269	0.517	0.23298	0.871641	0.019485	11849.8	YAR073W	IMD1		ORF	Dubious	Nonfunctional protein with homology to IMP dehydrogenase; blocked reading frame, located close to the telomere; not expressed at detectable levels; YAR073W and YAR075W comprise a continuous reading frame in most strains of S. cerevisiae; YAR073W/YAR075W together have a paralog, IMD2, that arose from a segmental duplication
YAR075W	-0.702	-1.591	-0.08	-0.613	0.759421	2.02098	0.322927	549.107	YAR075W	YAR075W		ORF	Dubious	Non-functional protein with homology IMP dehydrogenase; YAR073W/IMD1 and YAR075W comprise a continuous reading frame in most strains of S. cerevisiae; YAR073W/YAR075W together have a paralog, IMD2, that arose from a segmental duplication
YBL001C	1.0295	0.605	-0.259	0.458	0.656624	3.1303	0.184652	16966.8	YBL001C	ECM15		ORF	Verified	Non-essential protein of unknown function; likely exists as tetramer, may be regulated by the binding of small-molecule ligands (possibly sulfate ions), may have a role in yeast cell-wall biogenesis
YBL002W	0.708	-0.3065	-0.481	-0.026	0.642052	949.78	0.955304	8353.96	YBL002W	HTB2	histone H2B	ORF	Verified	Histone H2B; core histone protein required for chromatin assembly and chromosome function; nearly identical to HTB1; Rad6p-Bre1p-Lge1p mediated ubiquitination regulates reassembly after DNA replication, transcriptional activation, meiotic DSB formation and H3 methylation
YBL003C	0.432	-0.1235	-0.6925	-0.128	0.562264	34.3178	0.676878	40461.1	YBL003C	HTA2	histone H2A|H2A2	ORF	Verified	Histone H2A; core histone protein required for chromatin assembly and chromosome function; one of two nearly identical (see also HTA1) subtypes; DNA damage-dependent phosphorylation by Mec1p facilitates DNA repair; acetylated by Nat4p
YBL004W	-0.5425	-1.121	-0.902	-0.855	0.29208	0.399548	0.00529	2778.88	YBL004W	UTP20		ORF	Verified	Component of the small-subunit (SSU) processome; SSU processome is involved in the biogenesis of the 18S rRNA
YBL005W	-1.3115	-0.653	-0.637	-0.867	0.384887	0.51203	0.008469	4635	YBL005W	PDR3	drug-responsive transcription factor PDR3|TPE2|AMY2	ORF	Verified	Transcriptional activator of the pleiotropic drug resistance network; regulates expression of ATP-binding cassette (ABC) transporters through binding to cis-acting PDRE sites (PDR responsive elements); has a role in response to drugs and organic solvents; post-translationally up-regulated in cells lacking functional mitochondrial genome; involved in diauxic shift; relative distribution to nucleus…
YBL006C	0.3025	0.2815	0.075	0.219	0.125724	2.62138	0.01849	31170.5	YBL006C	LDB7	RSC14	ORF	Verified	Component of the RSC chromatin remodeling complex; interacts with Rsc3p, Rsc30p, Npl6p, and Htl1p to form a module important for a broad range of RSC functions
YBL007C	0.2535	0.3545	0.952	0.52	0.377516	1.39614	0.041251	48264.1	YBL007C	SLA1	cytoskeletal protein-binding protein SLA1	ORF	Verified	Cytoskeletal protein binding protein; required for assembly of the cortical actin cytoskeleton; interacts with proteins regulating actin dynamics and proteins required for endocytosis; found in the nucleus and cell cortex; has 3 SH3 domains
YBL008W	0.2485	0.2445	0.293	0.262	0.0269212	0.392185	0.001745	1861.54	YBL008W	HIR1		ORF	Verified	Subunit of the HIR complex; HIR is a nucleosome assembly complex involved in regulation of histone gene transcription; contributes to nucleosome formation, heterochromatic gene silencing, and formation of functional kinetochores
YBL009W	0.4405	0.31	0.3565	0.369	0.0661419	0.485762	0.013237	822.118	YBL009W	ALK2	protein kinase ALK2	ORF	Verified	Protein kinase; along with its paralog, ALK1, required for proper spindle positioning and nuclear segregation following mitotic arrest, proper organization of cell polarity factors in mitosis, proper localization of formins and polarity factors, and survival in cells that activate spindle assembly checkpoint; phosphorylated in response to DNA damage; ALK2 has a paralog, ALK1, that arose from the …
YBL010C	1.054	0.8065	0.8875	0.916	0.126187	0.150392	0.00037	2498.09	YBL010C	YBL010C		ORF	Uncharacterized	Putative protein of unknown function; green fluorescent protein (GFP)-fusion protein colocalizes with clathrin-coated vesicles
YBL011W	-1.084	-0.1275	0.0915	-0.373	0.62512	4.4931	0.244972	8484.49	YBL011W	SCT1	bifunctional glycerol-3-phosphate/glycerone-phosphate O-acyltransferase SCT1|GAT2	ORF	Verified	Glycerol 3-phosphate/dihydroxyacetone phosphate sn-1 acyltransferase; dual substrate-specific acyltransferase of the glycerolipid biosynthesis pathway; prefers 16-carbon fatty acids; similar to Gpt2p; gene is constitutively transcribed
YBL012C	0.6395	0.119	0.953	0.661	0.42126	0.964155	0.032319	294.224	YBL012C	YBL012C		ORF	Dubious	Dubious open reading frame; unlikely to encode a functional protein, based on available experimental and comparative sequence data
YBL013W	-1.125	0.9685	1.1205	0.611	1.25486	3.36136	0.413171	338.345	YBL013W	FMT1	methionyl-tRNA formyltransferase	ORF	Verified	Methionyl-tRNA formyltransferase; catalyzes the formylation of initiator Met-tRNA in mitochondria; potential Cdc28p substrate
YBL014C	-0.1075	0.0615	0.159	0.038	0.134839	93.3789	0.782008	1590.82	YBL014C	RRN6		ORF	Verified	Component of the core factor (CF) rDNA transcription factor complex; CF is required for transcription of 35S rRNA genes by RNA polymerase I and is composed of Rrn6p, Rrn7p, and Rrn11p
YBL015W	-1.407	-0.9555	-0.2805	-0.881	0.566933	0.730432	0.030043	48331.1	YBL015W	ACH1	acetyl-CoA hydrolase	ORF	Verified	Protein with CoA transferase activity; particularly for CoASH transfer from succinyl-CoA to acetate; has minor acetyl-CoA-hydrolase activity; phosphorylated; required for acetate utilization and for diploid pseudohyphal growth
YBL016W	0.2305	-0.077	0.341	0.165	0.216599	7.95588	0.15896	14857.1	YBL016W	FUS3	mitogen-activated serine/threonine-protein kinase FUS3|DAC2	ORF	Verified	Mitogen-activated serine/threonine protein kinase involved in mating; phosphoactivated by Ste7p; substrates include Ste12p, Far1p, Bni1p, Sst2p; inhibits invasive growth during mating by phosphorylating Tec1p, promoting its; inhibits recruitment of Ste5p, Cdc42p-mediated asymmetry and mating morphogenesis
YBL017C	-0.5225	-0.082	-0.207	-0.271	0.227012	3.09107	0.06347	9743.41	YBL017C	PEP1	type I sorting receptor|VPT1|VPS10	ORF	Verified	Type I transmembrane sorting receptor for multiple vacuolar hydrolases; cycles between the late-Golgi and prevacuolar endosome-like compartments
YBL018C	0.2085	-0.455	-0.3245	-0.19	0.351509	9.73709	0.331987	680.868	YBL018C	POP8	ribonuclease P	ORF	Verified	Subunit of both RNase MRP and nuclear RNase P; RNase MRP cleaves pre-rRNA, while nuclear RNase P cleaves tRNA precursors to generate mature 5' ends and facilitates turnover of nuclear RNAs; relocalizes to the cytosol in response to hypoxia
YBL019W	-0.4325	0.281	0.3365	0.062	0.42886	111.566	0.823619	9658.31	YBL019W	APN2	DNA-(apurinic or apyrimidinic site) lyase APN2|ETH1	ORF	Verified	Class II abasic (AP) endonuclease involved in repair of DNA damage; homolog of human HAP1 and E. coli exoIII
YBL020W	-2.219	-0.429	-0.3655	-1.004	1.05227	1.0439	0.09182	9885.68	YBL020W	RFT1	glycolipid translocation protein	ORF	Verified	Membrane protein required for translocation of Man5GlcNac2-PP-Dol; required for translocation of Man5GlcNac2-PP-Dol from the cytoplasmic side to the lumenal side of the ER membrane but is not the flippase; mutation is suppressed by expression of human p53 protein; essential gene
YBL021C	1.0395	0.313	0.4765	0.61	0.381118	1.02423	0.029824	8659.24	YBL021C	HAP3		ORF	Verified	Subunit of the Hap2p/3p/4p/5p CCAAT-binding complex; complex is heme-activated and glucose-repressed; complex is a transcriptional activator and global regulator of respiratory gene expression; contains sequences contributing to both complex assembly and DNA binding
YBL022C	-0.24	0.09	0.3925	0.081	0.31635	48.2167	0.663292	55296.2	YBL022C	PIM1	ATP-dependent Lon protease PIM1|LON1	ORF	Verified	ATP-dependent Lon protease; involved in degradation of misfolded proteins in mitochondria; required for biogenesis and maintenance of mitochondria
YBL023C	-0.017	0.253	0.5205	0.252	0.268751	4.23203	0.100118	9077.69	YBL023C	MCM2	MCM DNA helicase complex subunit MCM2	ORF	Verified	Protein involved in DNA replication; component of the Mcm2-7 hexameric helicase complex that binds chromatin as a part of the pre-replicative complex; relative distribution to the nucleus increases upon DNA replication stress
YBL024W	-0.725	-0.4025	-0.1205	-0.416	0.302476	1.74785	0.034772	5767.21	YBL024W	NCL1	tRNA (cytosine-C5-)-methyltransferase|TRM4	ORF	Verified	S-adenosyl-L-methionine-dependent tRNA: m5C-methyltransferase; methylates cytosine to m5C at several positions in tRNAs and intron-containing pre-tRNAs; increases proportion of tRNALeu(CAA) with m5C at wobble position in response to hydrogen peroxide, causing selective translation of mRNA from genes enriched in TTG codon; loss of NCL1 confers hypersensitivity to oxidative stress; similar to Nop2p…
YBL025W	-0.1895	-0.097	0.2895	0.001	0.254093	254093	1	1168.15	YBL025W	RRN10		ORF	Verified	Protein involved in promoting high level transcription of rDNA; subunit of UAF (upstream activation factor) for RNA polymerase I
YBL026W	0.439	0.361	0.2265	0.342	0.107495	0.91904	0.011853	1706.87	YBL026W	LSM2	Sm-like protein LSM2|SNP3|SMX5	ORF	Verified	Lsm (Like Sm) protein; part of heteroheptameric complexes (Lsm2p-7p and either Lsm1p or 8p): cytoplasmic Lsm1p complex involved in mRNA decay; nuclear Lsm8p complex part of U6 snRNP and possibly involved in processing tRNA, snoRNA, and rRNA; relocalizes from nucleus to cytoplasmic foci upon DNA replication stress
YBL027W	-0.416	-1.012	-1.3285	-0.919	0.463329	0.548604	0.013758	12839.9	YBL027W	RPL19B	eL19|ribosomal 60S subunit protein L19B|L19e|rpl5L|YL14|L23B|L19B	ORF	Verified	Ribosomal 60S subunit protein L19B; rpl19a and rpl19b single null mutations result in slow growth, while the double null mutation is lethal; homologous to mammalian ribosomal protein L19, no bacterial homolog; RPL19B has a paralog, RPL19A, that arose from the whole genome duplication
YBL028C	1.3315	-0.204	-0.2235	0.301	0.892204	9.84762	0.639922	381.159	YBL028C	YBL028C		ORF	Verified	Protein of unknown function that may interact with ribosomes; green fluorescent protein (GFP)-fusion protein localizes to the nucleolus; predicted to be involved in ribosome biogenesis
YBL029C-A	-0.6725	-0.981	-0.9835	-0.879	0.178839	0.231464	0.001004	6979.82	YBL029C-A	YBL029C-A		ORF	Verified	Protein of unknown function; green fluorescent protein (GFP)-fusion protein localizes to the cell periphery; protein abundance increases in response to DNA replication stress; has potential orthologs in Saccharomyces species and in Yarrowia lipolytica
YBL029W	0.841	-0.199	0.261	0.301	0.521153	5.75217	0.294222	351.063	YBL029W	YBL029W		ORF	Uncharacterized	Non-essential protein of unknown function
YBL030C	-0.6395	0.0715	0.685	0.039	0.662848	435.797	0.947813	39520.7	YBL030C	PET9	ADP/ATP carrier protein PET9|OP1|ANC2|AAC2	ORF	Verified	Major ADP/ATP carrier of the mitochondrial inner membrane; exchanges cytosolic ADP for mitochondrially synthesized ATP; also imports heme and ATP; required for viability in many lab strains that carry a sal1 mutation; PET9 has a paralog, AAC3, that arose from the whole genome duplication; human homolog SLC25A4 implicated in progressive external ophthalmoplegia can complement yeast null mutant
YBL031W	-0.2735	0.5315	0.8695	0.376	0.587185	4.15336	0.230778	1255.29	YBL031W	SHE1		ORF	Verified	Mitotic spindle protein; interacts with components of the Dam1 (DASH) complex, its effector Sli15p, and microtubule-associated protein Bim1p; also localizes to nuclear microtubules and to the bud neck in a ring-shaped structure; inhibits dynein function
YBL032W	0.3245	-0.0895	0.0835	0.106	0.207929	18.5056	0.340989	2560.69	YBL032W	HEK2	KHD1	ORF	Verified	RNA binding protein involved in asymmetric localization of ASH1 mRNA; represses translation of ASH1 mRNA, an effect reversed by Yck1p-dependent phosphoryation; regulates telomere position effect and length; similarity to hnRNP-K
YBL033C	0.502	-0.325	0.071	0.082	0.413623	61.5145	0.70468	3773.57	YBL033C	RIB1	GTP cyclohydrolase II	ORF	Verified	GTP cyclohydrolase II; catalyzes the first step of the riboflavin biosynthesis pathway
YBL034C	-0.3005	-0.0115	0.188	-0.042	0.245613	139.236	0.765599	7325.35	YBL034C	STU1		ORF	Verified	Component of the mitotic spindle; binds to interpolar microtubules via its association with beta-tubulin (Tub2p); required for interpolar microtubules to provide an outward force on the spindle poles
YBL035C	0.624	0.219	0.5295	0.457	0.211883	1.01453	0.009429	6971.84	YBL035C	POL12	DNA-directed DNA polymerase alpha subunit POL12	ORF	Verified	B subunit of DNA polymerase alpha-primase complex; required for initiation of DNA replication during mitotic and premeiotic DNA synthesis; also functions in telomere capping and length regulation
YBL036C	-0.0265	-0.029	-0.082	-0.046	0.0313462	14.8139	0.099949	8251.12	YBL036C	YBL036C		ORF	Verified	Putative non-specific single-domain racemase; based on structural similarity; binds pyridoxal 5'-phosphate; expression of GFP-fusion protein induced in response to the DNA-damaging agent MMS
YBL037W	0.353	0.2085	0.7665	0.443	0.289605	1.4757	0.035574	38449.1	YBL037W	APL3		ORF	Verified	Alpha-adaptin; large subunit of the clathrin associated protein complex (AP-2); involved in vesicle mediated transport
YBL038W	0.737	0.528	0.4135	0.56	0.164034	0.523069	0.003168	41429.9	YBL038W	MRPL16	RML16|mitochondrial 54S ribosomal protein YmL47|YmL47	ORF	Verified	Mitochondrial ribosomal protein of the large subunit; homologous to bacterial L16 ribosomal protein; synthetic lethality with hac1 mutation suggests a possible role in synthesis of precursors for protein glycosylation
YBL039C	-0.5885	-0.5875	-0.309	-0.495	0.161082	0.657408	0.008653	17777.1	YBL039C	URA7	CTP synthase URA7	ORF	Verified	Major CTP synthase isozyme (see also URA8); catalyzes the ATP-dependent transfer of the amide nitrogen from glutamine to UTP, forming CTP, the final step in de novo biosynthesis of pyrimidines; involved in phospholipid biosynthesis; capable of forming cytoplasmic filaments termed cytoophidium, especially during conditions of glucose depletion; URA7 has a paralog, URA8, that arose from the whole g…
YBL040C	0.772	0.5185	0.2525	0.514	0.259775	0.983266	0.013231	23016.2	YBL040C	ERD2		ORF	Verified	HDEL receptor; an integral membrane protein that binds to the HDEL motif in proteins destined for retention in the endoplasmic reticulum; has a role in maintenance of normal levels of ER-resident proteins
YBL041W	0.4515	0.4275	0.1635	0.347	0.1598	1.32714	0.010302	13786.8	YBL041W	PRE7	proteasome core particle subunit beta 6|PRS3	ORF	Verified	Beta 6 subunit of the 20S proteasome
YBL042C	-0.415	-0.6055	-0.3385	-0.453	0.137496	0.670031	0.003325	6289.66	YBL042C	FUI1	uridine permease	ORF	Verified	High affinity uridine permease, localizes to the plasma membrane; also mediates low but significant transport of the cytotoxic nucleoside analog 5-fluorouridine; not involved in uracil transport; relative distribution to the vacuole increases upon DNA replication stress
YBL043W	-1.0225	-1.194	-0.748	-0.988	0.224974	0.230472	0.002096	36695.2	YBL043W	ECM13		ORF	Verified	Non-essential protein of unknown function; induced by treatment with 8-methoxypsoralen and UVA irradiation; ECM13 has a paralog, YJR115W, that arose from the whole genome duplication
YBL044W	0.4575	0.846	0.3265	0.543	0.270177	0.916323	0.0129	512.456	YBL044W	YBL044W		ORF	Uncharacterized	Putative protein of unknown function; YBL044W is not an essential protein
YBL045C	0.4835	0.097	0.1435	0.241	0.211007	3.63298	0.07721	34713.8	YBL045C	COR1	ubiquinol--cytochrome-c reductase subunit COR1|QCR1	ORF	Verified	Core subunit of the ubiquinol-cytochrome c reductase complex; the ubiquinol-cytochrome c reductase complex (bc1 complex) is a component of the mitochondrial inner membrane electron transport chain
YBL046W	0.7805	0.195	0.3935	0.457	0.297764	1.42574	0.028553	15374.2	YBL046W	PSY4	HSM6	ORF	Verified	Regulatory subunit of protein phosphatase PP4; presence of Psy4p in the PP4 complex (along with catalytic subunit Pph3p and Psy2p) is required for dephosphorylation of the histone variant H2AX, but not for dephosphorylation of Rad53p, during recovery from the DNA damage checkpoint; localization is cell-cycle dependent and regulated by Cdc28p phosphorylation; required for cisplatin resistance; hom…
YBL047C	-0.117	0.105	0.3335	0.107	0.225258	19.6749	0.389758	76749.9	YBL047C	EDE1	BUD15	ORF	Verified	Scaffold protein involved in the formation of early endocytic sites; putative regulator of cytokinesis; homo-oligomerization is required for localization to and organization of endocytic sites; has a network of interactions with other endocytic proteins; binds membranes in a ubiquitin-dependent manner; may also bind ubiquitinated membrane-associated proteins; interacts with Cmk2 and functions ups…
YBL048W	-0.357	0.395	0.4465	0.162	0.449772	17.1381	0.494476	52032	YBL048W	RRT1		ORF	Dubious	Protein of unknown function; identified in a screen for mutants with increased levels of rDNA transcription; dubious open reading frame unlikely to encode a protein, based on experimental and comparative sequence data
YBL049W	-0.3625	0.387	0.2655	0.097	0.402264	42.7531	0.646088	11072.7	YBL049W	MOH1		ORF	Verified	Protein of unknown function, essential for stationary phase survival; not required for growth on nonfermentable carbon sources; possibly linked with vacuolar transport
YBL050W	0.358	0.108	-0.1685	0.099	0.263361	26.8708	0.467052	35190.6	YBL050W	SEC17	RNS3	ORF	Verified	Alpha-SNAP cochaperone; SNARE-complex adaptor for Sec18 (NSF) during the disassembly of postfusion cis-SNARE complexes; stimulates the ATPase activity of Sec18p; peripheral membrane protein required for vesicular transport between ER and Golgi, the 'priming' step in homotypic vacuole fusion, and autophagy; similar to mammalian alpha-SNAP
YBL051C	-0.113	0.5335	0.6905	0.37	0.425876	3.11086	0.12338	18869	YBL051C	PIN4	MDT1	ORF	Verified	Protein involved in G2/M phase progression and response to DNA damage; interacts with Rad53p; contains an RNA recognition motif, a nuclear localization signal, and several SQ/TQ cluster domains; hyperphosphorylated in response to DNA damage
YBL052C	0.212	0.566	0.5195	0.433	0.192369	1.02603	0.024275	1018.81	YBL052C	SAS3	KAT6	ORF	Verified	Histone acetyltransferase catalytic subunit of NuA3 complex; acetylates histone H3, involved in transcriptional silencing; homolog of the mammalian MOZ proto-oncogene; mutant has aneuploidy tolerance; sas3gcn5 double mutation is lethal
YBL053W	0	0	1.007	1.007	0.581392	0.573337	0.283837	250	YBL053W	YBL053W		ORF	Dubious	Dubious open reading frame; unlikely to encode a functional protein, based on available experimental and comparative sequence data
YBL054W	0.3225	-0.2325	-0.1595	-0.023	0.301573	570.081	0.898781	22677.2	YBL054W	TOD6	PBF1	ORF	Verified	PAC motif binding protein involved in rRNA and ribosome biogenesis; subunit of the RPD3L histone deacetylase complex; Myb-like HTH transcription factor; hypophosphorylated by rapamycin treatment in a Sch9p-dependent manner; activated in stochastic pulses of nuclear localization
YBL055C	-0.0835	-0.566	-0.77	-0.473	0.352539	1.57574	0.037512	3951.51	YBL055C	YBL055C	3'-5'-exodeoxyribonuclease|Tat-D	ORF	Verified	3'-->5' exonuclease and endonuclease with a possible role in apoptosis; has similarity to mammalian and C. elegans apoptotic nucleases
YBL056W	-0.3155	0.3275	0.5115	0.174	0.434211	14.3417	0.478349	45099.3	YBL056W	PTC3	type 2C protein phosphatase PTC3	ORF	Verified	Type 2C protein phosphatase (PP2C); dephosphorylates Hog1p (see also Ptc2p) to limit maximal kinase activity induced by osmotic stress; dephosphorylates T169 phosphorylated Cdc28p (see also Ptc2p); role in DNA damage checkpoint inactivation; PTC3 has a paralog, PTC2, that arose from the whole genome duplication
YBL057C	0.377	-0.3325	-0.453	-0.136	0.448481	24.2475	0.569552	14865.7	YBL057C	PTH2	aminoacyl-tRNA hydrolase	ORF	Verified	One of two mitochondrially-localized peptidyl-tRNA hydrolases; negatively regulates the ubiquitin-proteasome pathway via interactions with ubiquitin-like ubiquitin-associated proteins; dispensable for cell growth; see also PTH1
YBL058W	-0.001	0.2975	-0.0015	0.098	0.172484	17.9596	0.350939	60907.2	YBL058W	SHP1	protein phosphatase regulator SHP1|UBX1	ORF	Verified	UBX domain-containing substrate adaptor for Cdc48p; ubiquitin regulatory X domain-containing protein that acts as a substrate recruiting cofactor for Cdc48p; positively regulates Glc7p PPase activity to promote growth and mitotic progression in complex with Cdc48p; ubiquitinated protein interactor involved in ER-associated degradation (ERAD); regulated by nuclear Ub-dependent degradation (INMAD p…
YBL059C-A	0.1935	-0.096	-0.664	-0.189	0.436223	12.2119	0.404733	2957.49	YBL059C-A	CMC2		ORF	Verified	Protein involved in respiratory chain complex assembly or maintenance; protein of the mitochondrial intermembrane space; contains twin Cx9C motifs that can form coiled coil-helix-coiled-coil helix fold
YBL059W	0.3505	0.011	-0.3365	0.009	0.343508	4240.84	0.986371	7044.96	YBL059W	YBL059W		ORF	Uncharacterized	Putative protein of unknown function; the authentic, non-tagged protein is detected in highly purified mitochondria in high-throughput studies; YBL059W has a paralog, YER093C-A, that arose from the whole genome duplication
YBL060W	0.4045	-0.091	0.01	0.108	0.261837	22.4483	0.449492	1250.96	YBL060W	YEL1	Arf family guanine nucleotide exchange factor YEL1	ORF	Verified	Guanine nucleotide exchange factor specific for Arf3p; localized to the bud neck and tip; required for localization of Arf3p to the bud neck and tip
YBL061C	0.0765	-0.196	0.279	0.053	0.238358	84.8551	0.676878	1443.72	YBL061C	SKT5	CSD4|CHS4|CAL2	ORF	Verified	Activator of Chs3p (chitin synthase III) during vegetative growth; recruits Chs3p to the bud neck via interaction with Bni4p; SKT5 has a paralog, SHC1, that arose from the whole genome duplication
YBL062W	0	0	0.477	0.477	0.275396	1.21038	1	323.55	YBL062W	YBL062W		ORF	Dubious	Dubious open reading frame; unlikely to encode a functional protein, based on available experimental and comparative sequence data
YBL063W	0.1295	0.7105	0.7135	0.518	0.33631	1.25337	0.030555	3255.35	YBL063W	KIP1	CIN9	ORF	Verified	Kinesin-related motor protein; required for mitotic spindle assembly, chromosome segregation, and 2 micron plasmid partitioning; functionally redundant with Cin8p for chromosomal but not plasmid functions
YBL064C	-0.2105	-0.247	-0.4295	-0.296	0.117331	1.33915	0.037753	45502.4	YBL064C	PRX1	thioredoxin peroxidase PRX1	ORF	Verified	Mitochondrial peroxiredoxin with thioredoxin peroxidase activity; has a role in reduction of hydroperoxides; reactivation requires Trr2p and glutathione; induced during respiratory growth and oxidative stress; phosphorylated; protein abundance increases in response to DNA replication stress
YBL065W	1.8585	2.384	2.119	2.121	0.262753	0.0584072	0.000318	6028.44	YBL065W	YBL065W		ORF	Dubious	Dubious open reading frame; unlikely to encode a functional protein, based on available experimental and comparative sequence data; partially overlaps verified ORF SEF1/YBL066C; YBL065W is a non-essential gene
YBL066C	-1.5605	-0.8215	-0.4515	-0.944	0.564639	0.633617	0.020049	6795.32	YBL066C	SEF1		ORF	Verified	Putative transcription factor; has homolog in Kluyveromyces lactis
YBL067C	0.0155	1.0615	0.7465	0.608	0.53661	1.45162	0.05934	26797.5	YBL067C	UBP13	ubiquitin-specific protease UBP13	ORF	Verified	Ubiquitin-specific protease that cleaves Ub-protein fusions; UBP13 has a paralog, UBP9, that arose from the whole genome duplication
YBL068W	-0.3345	-0.8365	-0.771	-0.647	0.272894	0.651906	0.007212	11449.2	YBL068W	PRS4	ribose phosphate diphosphokinase subunit PRS4	ORF	Verified	5-phospho-ribosyl-1(alpha)-pyrophosphate synthetase, synthesizes PRPP; which is required for nucleotide, histidine, and tryptophan biosynthesis; one of five related enzymes, which are active as heteromultimeric complexes; PRS4 has a paralog, PRS2, that arose from the whole genome duplication; a missense mutation in the conserved residue R196 of its human homolog PRPS1 is pathogenic
YBL069W	-0.669	-0.2735	0.3995	-0.181	0.540222	16.4898	0.507572	2045.75	YBL069W	AST1		ORF	Verified	Lipid raft associated protein; interacts with the plasma membrane ATPase Pma1p and has a role in its targeting to the plasma membrane by influencing its incorporation into lipid rafts; sometimes classified in the medium-chain dehydrogenase/reductases (MDRs) superfamily; AST1 has a paralog, AST2, that arose from the whole genome duplication
YBL070C	1.458	-2.815	0.0445	-0.317	2.1769	21.663	0.825916	483.529	YBL070C	YBL070C		ORF	Dubious	Dubious open reading frame; unlikely to encode a functional protein, based on available experimental and comparative sequence data
YBL071C	0	0.478	-0.171	0.045	0.336384	166.116	0.928071	291.523	YBL071C	YBL071C		ORF	Uncharacterized	Putative protein of unknown function; conserved among S. cerevisiae strains; YBL071C is not an essential gene
YBL071W-A	-0.085	0.561	-0.082	0.131	0.372105	21.6832	0.694854	344.106	YBL071W-A	KTI11	DPH3	ORF	Verified	Zn-ribbon protein that co-purifies with Dph1 and Dph2; in a complex required for synthesis of diphthamide on translation factor eEF2 and with Elongator subunits Iki3p, Elp2p, and Elp3p; involved in modification of wobble nucleosides in tRNAs; forms a stable heterodimer with Ats1p
YBL072C	-2.2395	-1.985	-2.8925	-2.372	0.468105	0.0831983	0.00092	13930.7	YBL072C	RPS8A	eS8|ribosomal 40S subunit protein S8A|S8e|rp19|YS9|S8A|S14A	ORF	Verified	Protein component of the small (40S) ribosomal subunit; homologous to mammalian ribosomal protein S8, no bacterial homolog; RPS8A has a paralog, RPS8B, that arose from the whole genome duplication
YBL073W	0	0	0.501	0.501	0.289252	1.1524	0.099013	369.591	YBL073W	YBL073W		ORF	Dubious	Dubious open reading frame; unlikely to encode a functional protein, based on available experimental and comparative sequence data; partially overlaps the essential gene AAR2/YBL074C
YBL074C	0	0	-0.258	-0.258	0.148956	2.23779	1	496.625	YBL074C	AAR2	U5 snRNP complex subunit AAR2	ORF	Verified	Component of the U5 snRNP complex; required for splicing of U3 precursors; originally described as a splicing factor specifically required for splicing pre-mRNA of the MATa1 cistron
YBL075C	-2.082	-1.2685	-1.0805	-1.477	0.532311	0.244008	0.004322	15365.5	YBL075C	SSA3	Hsp70 family ATPase SSA3|YG106	ORF	Verified	ATPase involved in protein folding and the response to stress; plays a role in SRP-dependent cotranslational protein-membrane targeting and translocation; member of the heat shock protein 70 (HSP70) family; localized to the cytoplasm; SSA3 has a paralog, SSA4, that arose from the whole genome duplication
YBL076C	-0.1525	-0.483	-0.375	-0.337	0.168523	1.48388	0.014499	58396.4	YBL076C	ILS1	isoleucine--tRNA ligase ILS1	ORF	Verified	Cytoplasmic isoleucine-tRNA synthetase; target of the G1-specific inhibitor reveromycin A
YBL077W	0	0	-1.701	-1.701	0.982073	0.339418	1	303.038	YBL077W	YBL077W		ORF	Dubious	Dubious open reading frame; unlikely to encode a functional protein, based on available experimental and comparative sequence data; partially overlaps the verified gene ILS1/YBL076C
YBL078C	0.3845	0.6415	0.092	0.373	0.274941	1.97616	0.035853	32579.5	YBL078C	ATG8	ubiquitin-like protein ATG8|AUT7|CVT5|APG8	ORF	Verified	Component of autophagosomes and Cvt vesicles; regulator of Atg1p, targets it to autophagosomes; binds the Atg1p-Atg13p complex, triggering its vacuolar degradation; unique ubiquitin-like protein whose conjugation target is lipid phosphatidylethanolamine (PE); Atg8p-PE is anchored to membranes, is involved in phagophore expansion, and may mediate membrane fusion during autophagosome formation; dec…
YBL079W	-0.3695	-0.3245	-0.368	-0.354	0.0255588	0.203954	0.010192	12179	YBL079W	NUP170	NLE3	ORF	Verified	Subunit of inner ring of nuclear pore complex (NPC); contributes to NPC assembly and nucleocytoplasmic transport; interacts with genomic regions that contain ribosomal protein and subtelomeric genes, where it functions in nucleosome positioning and as a repressor of transcription; both Nup170p and NUP157p are similar to human Nup155p; NUP170 has a paralog, NUP157, that arose from the whole genome…
YBL080C	0.633	0.662	0.428	0.574	0.127555	0.387146	0.009267	2354.4	YBL080C	PET112	glutamyl-tRNA(Gln) amidotransferase subunit PET112	ORF	Verified	Subunit of the trimeric GatFAB AmidoTransferase(AdT) complex; involved in the formation of Q-tRNAQ; mutation is functionally complemented by the bacterial GatB ortholog
YBL081W	-0.105	-0.5835	-0.2695	-0.319	0.243111	2.38904	0.050215	11511.1	YBL081W	YBL081W		ORF	Uncharacterized	Non-essential protein of unknown function; null mutation results in a decrease in plasma membrane electron transport
YBL082C	-0.539	0.2385	0.7595	0.153	0.653459	27.9148	0.6558	9175.1	YBL082C	ALG3	dolichyl-P-Man:Man(5)GlcNAc(2)-PP-dolichol alpha-1,3-mannosyltransferase|RHK1	ORF	Verified	Dolichol-P-Man dependent alpha(1-3) mannosyltransferase; involved in synthesis of dolichol-linked oligosaccharide donor for N-linked glycosylation of proteins; G353A missense mutation in human ortholog ALG3 implicated in carbohydrate deficient glycoprotein syndrome type IV, which is characterized by microcephaly, severe epilepsy, minimal psychomotor development, partial deficiency of sialic acids…
YBL083C	-0.16	0.1355	0.5615	0.179	0.362712	11.3202	0.397697	31926.4	YBL083C	YBL083C		ORF	Dubious	Dubious open reading frame; unlikely to encode a functional protein, based on available experimental and comparative sequence data; overlaps verified ORF ALG3
YBL084C	-0.6595	-0.3045	-0.7555	-0.573	0.237572	0.723578	0.013758	2957.62	YBL084C	CDC27	anaphase promoting complex subunit CDC27|SNB1|APC3	ORF	Verified	Subunit of the Anaphase-Promoting Complex/Cyclosome (APC/C); APC/C is a ubiquitin-protein ligase required for degradation of anaphase inhibitors, including mitotic cyclins, during the metaphase/anaphase transition
YBL085W	-0.3655	-0.2345	-0.624	-0.408	0.198198	1.19063	0.019098	22737.4	YBL085W	BOI1	BOB1|GIN7	ORF	Verified	Protein implicated in polar growth; functionally redundant with Boi2p; interacts with bud-emergence protein Bem1p; contains an SH3 (src homology 3) domain and a PH (pleckstrin homology) domain; relocalizes from bud neck to cytoplasm upon DNA replication stress; BOI1 has a paralog, BOI2, that arose from the whole genome duplication
YBL086C	0.016	-0.19	-0.507	-0.227	0.263456	5.11277	0.185349	1300.62	YBL086C	YBL086C		ORF	Uncharacterized	Protein of unknown function; green fluorescent protein (GFP)-fusion protein localizes to the cell periphery
YBL087C	-0.6975	-1.237	-1.379	-1.104	0.359552	0.295001	0.004366	3751.46	YBL087C	RPL23A	uL14|ribosomal 60S subunit protein L23A|L14|YL32|L23A|L17aA	ORF	Verified	Ribosomal 60S subunit protein L23A; homologous to mammalian ribosomal protein L23 and bacterial L14; RPL23A has a paralog, RPL23B, that arose from the whole genome duplication
YBL088C	-0.184	0.1215	0.0875	0.008	0.167431	2616.11	0.947357	2235.47	YBL088C	TEL1	DNA-binding protein kinase TEL1	ORF	Verified	Protein kinase primarily involved in telomere length regulation; contributes to cell cycle checkpoint control in response to DNA damage; acts with Red1p and Mec1p to promote interhomolog recombination by phosphorylation of Hop1; functionally redundant with Mec1p; regulates P-body formation induced by replication stress; homolog of human ataxia-telangiectasia mutated (ATM) gene
YBL089W	0.3275	0.353	0.402	0.361	0.0378627	0.290534	0.00288	6780.98	YBL089W	AVT5	amino acid transporter	ORF	Verified	Putative transporter; member of a family of seven S. cerevisiae genes (AVT1-7) related to vesicular GABA-glycine transporters; AVT5 has a paralog, AVT6, that arose from the whole genome duplication
YBL090W	0.081	0.2655	-0.092	0.085	0.178781	24.7448	0.389199	2472.56	YBL090W	MRP21	mitochondrial 37S ribosomal protein MRP21|MRP50	ORF	Verified	Mitochondrial ribosomal protein of the small subunit; MRP21 exhibits genetic interactions with mutations in the COX2 and COX3 mRNA 5'-untranslated leader sequences
YBL091C	0.0245	0.079	0.092	0.065	0.0358132	8.47649	0.19959	50545.5	YBL091C	MAP2	methionine aminopeptidase	ORF	Verified	Methionine aminopeptidase; catalyzes the cotranslational removal of N-terminal methionine from nascent polypeptides; function is partially redundant with that of Map1p
YBL091C-A	0.0465	-0.4105	-0.5025	-0.289	0.294028	3.52041	0.092814	1370.78	YBL091C-A	SCS22	phospholipid metabolism-regulating protein SCS22	ORF	Verified	Protein involved in regulation of phospholipid metabolism; one of 6 proteins (Ist2p, Scs2p, Scs22p, Tcb1p, Tcb2p, Tcb3p) that connect the ER and plasma membrane (PM); regulates PM PI4P levels by controlling access of the Sac1p phosphatase to its substrate, PI4P; human VAP homolog; similar to D. melanogaster inturned protein; SWAT-GFP and mCherry fusion proteins localize to the cytosol; SCS22 has …
YBL092W	-0.1085	-0.7405	-1.0065	-0.619	0.461263	1.20384	0.037753	34991.1	YBL092W	RPL32	eL32|ribosomal 60S subunit protein L32|L32e|L32	ORF	Verified	Ribosomal 60S subunit protein L32; overexpression disrupts telomeric silencing; homologous to mammalian ribosomal protein L32, no bacterial homolog
YBL093C	0.7755	0.2405	0.3785	0.465	0.277752	1.28455	0.019713	14000.3	YBL093C	ROX3	SSX2|MED19|SSN7|NUT3	ORF	Verified	Subunit of the RNA polymerase II mediator complex; associates with core polymerase subunits to form the RNA polymerase II holoenzyme
YBL094C	0.361	0.89	0.716	0.656	0.269611	0.626514	0.0129	410.529	YBL094C	YBL094C		ORF	Dubious	Dubious open reading frame; unlikely to encode a functional protein, based on available experimental and comparative sequence data; partially overlaps uncharacterized ORF YBL095W
YBL095W	0.071	0.197	-0.082	0.062	0.139718	36.3469	0.484792	3615.29	YBL095W	MRX3		ORF	Uncharacterized	Protein that associates with mitochondrial ribosome; likely functions in cristae junction formation; the authentic, non-tagged protein is detected in highly purified mitochondria in high-throughput studies
YBL096C	0.743	0.917	0.8255	0.829	0.0870388	0.12665	0.000529	762.956	YBL096C	YBL096C		ORF	Dubious	Non-essential protein of unknown function
YBL097W	0	1.2125	0.691	0.952	0.608221	0.671101	0.042845	295.815	YBL097W	BRN1	condensin subunit BRN1	ORF	Verified	Subunit of the condensin complex; required for chromosome condensation and for clustering of tRNA genes at the nucleolus; may influence multiple aspects of chromosome transmission
YBL098W	-0.747	-0.845	-1.0925	-0.895	0.178059	0.222289	0.001832	11145.5	YBL098W	BNA4	kynurenine 3-monooxygenase	ORF	Verified	Kynurenine 3-monooxygenase; required for the de novo biosynthesis of NAD from tryptophan via kynurenine; expression regulated by Hst1p; putative therapeutic target for Huntington disease
YBL099W	-0.943	-0.1805	0.007	-0.372	0.503167	3.63602	0.175752	29307.5	YBL099W	ATP1	F1F0 ATP synthase subunit alpha	ORF	Verified	Alpha subunit of the F1 sector of mitochondrial F1F0 ATP synthase; which is a large, evolutionarily conserved enzyme complex required for ATP synthesis; F1 translationally regulates ATP6 and ATP8 expression to achieve a balanced output of ATP synthase genes encoded in nucleus and mitochondria; phosphorylated; N-terminally propionylated in vivo
YBL100C	0.2455	0.006	0.5035	0.252	0.248807	3.91798	0.131593	1288.6	YBL100C	YBL100C		ORF	Dubious	Dubious open reading frame; unlikely to encode a functional protein, based on available experimental and comparative sequence data; almost completely overlaps the 5' end of ATP1
YBL101C	-1.8675	-1.0365	-0.838	-1.247	0.546174	0.351235	0.007689	6133.5	YBL101C	ECM21	ART2	ORF	Verified	Protein involved in regulating endocytosis of plasma membrane proteins; identified as a substrate for ubiquitination by Rsp5p and deubiquitination by Ubp2p; promoter contains several Gcn4p binding elements; ECM21 has a paralog, CSR2, that arose from the whole genome duplication
YBL102W	-0.179	0.129	0.0005	-0.017	0.154702	535.301	0.873147	46144.2	YBL102W	SFT2		ORF	Verified	Tetra-spanning membrane protein found mostly in the late Golgi; non-essential; can suppress some sed5 alleles; may be part of the transport machinery, but precise function is unknown; similar to mammalian syntaxin 5
YBL103C	0.684	0.195	0.3035	0.394	0.256799	1.65425	0.044715	54114.8	YBL103C	RTG3		ORF	Verified	bHLH/Zip transcription factor for retrograde (RTG) and TOR pathways; forms a complex with another bHLH/Zip protein, Rtg1p, to activate the pathways; target of Hog1p
YBL104C	-0.1545	-0.577	-0.435	-0.389	0.215	1.42082	0.016585	6247.29	YBL104C	SEA4	YBL103C-A	ORF	Verified	Subunit of SEACAT, a subcomplex of the SEA complex; Sea4p, along with Rtc1p and Mtc5p, redundantly inhibit the TORC1 inhibitory role of the Iml1p/SEACIT (Iml1p-Npr2p-Npr3p) subcomplex, a GAP for GTPase Gtr1p (EGOC subunit) in response to amino acid limitation, thereby resulting in activation of TORC1 signaling; SEA is a coatomer-related complex that associates dynamically with the vacuole; contai…
YBL105C	-0.8335	-0.2355	-0.259	-0.443	0.338675	1.72574	0.040759	13109.6	YBL105C	PKC1	protein kinase C|CLY7|CLY5|STT1|HPO2|CLY15	ORF	Verified	Protein serine/threonine kinase; essential for cell wall remodeling during growth; localized to sites of polarized growth and the mother-daughter bud neck; homolog of the alpha, beta, and gamma isoforms of mammalian protein kinase C (PKC)
YBL106C	-0.1205	0.027	-0.008	-0.034	0.0770687	66.6684	0.524321	3566.75	YBL106C	SRO77	putative Rab GTPase-binding protein SRO77|SNI2|SOP2	ORF	Verified	Protein with roles in exocytosis and cation homeostasis; functions in docking and fusion of post-Golgi vesicles with plasma membrane; regulates cell proliferation and colony development via the Rho1-Tor1 pathway; interacts with SNARE protein Sec9p; homolog of Drosophila lethal giant larvae tumor suppressor; SRO77 has a paralog, SRO7, that arose from the whole genome duplication
YBL107C	0.7025	0.8255	0.429	0.652	0.202955	0.477423	0.002841	5639.48	YBL107C	MIX23	MIC23	ORF	Verified	Mitochondrial intermembrane space protein of unknown function; imported via the MIA import machinery; contains an unusual twin cysteine motif (CX13C CX14C)
YBL107W-A	1.0105	1.1555	0.97	1.045	0.0975325	0.0893134	0.000784	35840.8	YBL107W-A	YBL107W-A		ORF	Dubious	Dubious open reading frame; unlikely to encode a functional protein, based on available experimental and comparative sequence data; completely overlaps the Ty2 LTR YBLWdelta2; YBL107W-A has a paralog, YER138W-A, that arose from a single-locus duplication
YBL108C-A	-0.1865	-0.0775	-0.255	-0.173	0.0895168	2.99097	0.020435	32129.4	YBL108C-A	PAU9	seripauperin PAU9	ORF	Verified	Protein of unknown function; member of the seripauperin multigene family encoded mainly in subtelomeric regions; SWAT-GFP and mCherry fusion proteins localize to the endoplasmic reticulum and vacuole respectively
YBL108W	0	0	0.941	0.941	0.543287	0.61355	0.371379	442.75	YBL108W	YBL108W		ORF	Dubious	Dubious open reading frame; unlikely to encode a functional protein, based on available experimental and comparative sequence data
YBL109W	0.215	-0.0505	0.04	0.068	0.134973	29.1896	0.351617	1842.46	YBL109W	YBL109W		ORF	Dubious	Dubious open reading frame; unlikely to encode a functional protein, based on available experimental and comparative sequence data
YBL111C	-0.062	0.8295	1.049	0.605	0.588398	1.60754	0.077261	6160.97	YBL111C	YBL111C		ORF	Verified	Helicase-like protein encoded within the telomeric Y' element; relocalizes from mitochondrion to cytoplasm upon DNA replication stress
YBL112C	0.045	1.0685	1.203	0.772	0.633325	1.06266	0.049365	7596.34	YBL112C	YBL112C		ORF	Uncharacterized	Putative protein of unknown function; YBL112C is contained within TEL02L
YBL113C	0.0595	0.682	1.293	0.678	0.616759	1.3417	0.079964	48277.3	YBL113C	YBL113C		ORF	Uncharacterized	Helicase-like protein encoded within the telomeric Y' element
YBR001C	-0.3675	0.1995	-0.012	-0.06	0.286531	79.5921	0.740969	18534.4	YBR001C	NTH2	alpha,alpha-trehalase NTH2	ORF	Verified	Putative neutral trehalase, required for thermotolerance; may mediate resistance to other cellular stresses; NTH2 has a paralog, NTH1, that arose from the whole genome duplication
YBR002C	-0.6515	0.085	0.326	-0.08	0.509251	79.5705	0.770968	6474.06	YBR002C	RER2	ditrans,polycis-polyprenyl diphosphate synthase	ORF	Verified	Forms the dehydrodolichyl diphosphate syntase (DDS) complex with NUS1; major enzyme of polyprenol synthesis in both the endoplasmic reticulum (ER) and in lipid droplets; participates in ER protein sorting; human ortholog DHDDS functionally complements the heat sensitive growth defect of a ts allele, and is associated with retinitis pigmentosa
YBR003W	0.0795	0.138	-0.1575	0.02	0.156478	391.194	0.896615	23782.7	YBR003W	COQ1	trans-hexaprenyltranstransferase	ORF	Verified	Hexaprenyl pyrophosphate synthetase; catalyzes the first step in ubiquinone (coenzyme Q) biosynthesis
YBR004C	-1.5975	-1.381	-1.513	-1.497	0.109115	0.0486901	0.000153	11132.8	YBR004C	GPI18	GPI-anchor transamidase GPI18|FMP44	ORF	Verified	Functional ortholog of human PIG-V; PIG-V is a mannosyltransferase that transfers the second mannose in glycosylphosphatidylinositol biosynthesis; the authentic, non-tagged protein was localized to mitochondria
YBR005W	-1.3975	-1.0975	-1.2485	-1.248	0.150001	0.0963087	0.000324	18180.6	YBR005W	RCR1	SSH6	ORF	Verified	Protein of the ER membrane involved in cell wall chitin deposition; may function in the endosomal-vacuolar trafficking pathway, helping determine whether plasma membrane proteins are degraded or routed to the plasma membrane; RCR1 has a paralog, RCR2, that arose from the whole genome duplication
YBR006W	-0.4825	-0.042	-0.0685	-0.198	0.247029	6.3011	0.165565	30987.8	YBR006W	UGA2	succinate-semialdehyde dehydrogenase (NAD(P)(+))|UGA5	ORF	Verified	Succinate semialdehyde dehydrogenase; involved in the utilization of gamma-aminobutyrate (GABA) as a nitrogen source; part of the 4-aminobutyrate and glutamate degradation pathways; localized to the cytoplasm
YBR007C	0.1305	-0.138	-0.0825	-0.03	0.14174	157.489	0.844397	2663.82	YBR007C	DSF2		ORF	Verified	Deletion suppressor of mpt5 mutation; relocalizes from bud neck to cytoplasm upon DNA replication stress
YBR008C	-0.607	0.331	0.642	0.122	0.650201	43.6845	0.72525	6419.71	YBR008C	FLR1		ORF	Verified	Plasma membrane transporter of the major facilitator superfamily; member of the 12-spanner drug:H(+) antiporter DHA1 family; involved in efflux of fluconazole, diazaborine, benomyl, methotrexate, and other drugs; expression induced in cells treated with the mycotoxin patulin; relocalizes from nucleus to plasma membrane upon DNA replication stress
YBR009C	0.456	-0.065	-0.317	0.025	0.394224	630.758	0.935262	49547.5	YBR009C	HHF1	histone H4	ORF	Verified	Histone H4; core histone protein required for chromatin assembly and chromosome function; one of two identical histone proteins (see also HHF2); contributes to telomeric silencing; N-terminal domain involved in maintaining genomic integrity
YBR010W	0.6075	-0.1835	-0.11	0.105	0.437014	39.6385	0.708204	50053.1	YBR010W	HHT1	histone H3|SIN2|BUR5	ORF	Verified	Histone H3; core histone protein required for chromatin assembly, part of heterochromatin-mediated telomeric and HM silencing; one of two identical histone H3 proteins (see HHT2); regulated by acetylation, methylation, and phosphorylation; H3K14 acetylation plays an important role in the unfolding of strongly positioned nucleosomes during repair of UV damage
YBR011C	0.2715	-0.49	-0.422	-0.214	0.421396	9.20159	0.317222	48448.1	YBR011C	IPP1	inorganic diphosphatase IPP1|PPA1	ORF	Verified	Cytoplasmic inorganic pyrophosphatase (PPase); homodimer that catalyzes the rapid exchange of oxygens from Pi with water, highly expressed and essential for viability, active-site residues show identity to those from E. coli PPase
YBR012C	0	0	0	0	0	0	1	436.214	YBR012C	YBR012C		ORF	Dubious	Dubious open reading frame; unlikely to encode a functional protein, based on available experimental and comparative sequence data; expression induced by iron-regulated transcriptional activator Aft2p
YBR013C	0	0	1.304	1.304	0.752865	0.442753	1	328.625	YBR013C	YBR013C		ORF	Uncharacterized	Putative protein of unknown function; haploid deletion mutant exhibits synthetic phenotype with alpha-synuclein; SWAT-GFP fusion protein localizes to the endoplasmic reticulum while mCherry fusion protein localizes to both the endoplasmic reticulum and vacuole
YBR014C	0.046	-0.547	-0.9245	-0.475	0.489221	2.16829	0.09161	3648.69	YBR014C	GRX7	glutathione-disulfide reductase GRX7	ORF	Verified	Cis-golgi localized monothiol glutaredoxin; more similar in activity to dithiol than other monothiol glutaredoxins; involved in the oxidative stress response; does not bind metal ions; GRX7 has a paralog, GRX6, that arose from the whole genome duplication
YBR015C	-0.3585	0.1915	0.3155	0.05	0.358737	143.495	0.80183	29908.5	YBR015C	MNN2	alpha-1,2-mannosyltransferase MNN2|LDB8|CRV4|TTP1	ORF	Verified	Alpha-1,2-mannosyltransferase; responsible for addition of the first alpha-1,2-linked mannose to form the branches on the mannan backbone of oligosaccharides, localizes to an early Golgi compartment
YBR016W	-0.0285	-0.4155	-0.235	-0.226	0.193646	3.79132	0.3765	46429.4	YBR016W	YBR016W		ORF	Verified	Tail-anchored plasma membrane protein with a conserved CYSTM module; predicted to be palmitoylated; has similarity to hydrophilins, which are involved in the adaptive response to hyperosmotic conditions; YBR016W has a paralog, YDL012C, that arose from the whole genome duplication
YBR017C	-1.6635	-0.6715	-0.464	-0.933	0.641082	0.736462	0.029134	5117.72	YBR017C	KAP104		ORF	Verified	Transportin or cytosolic karyopherin beta 2; functions in the rg-nuclear localization signal-mediated nuclear import/reimport of mRNA-binding proteins Nab2p and Hrp1p; regulates asymmetric protein synthesis in daughter cells during mitosis
YBR018C	-0.059	0.222	0.376	0.18	0.220568	6.80766	0.162187	606.926	YBR018C	GAL7	UDP-glucose:hexose-1-phosphate uridylyltransferase	ORF	Verified	Galactose-1-phosphate uridyl transferase; synthesizes glucose-1-phosphate and UDP-galactose from UDP-D-glucose and alpha-D-galactose-1-phosphate in the second step of galactose catabolism; human homolog UGP2 can complement yeast null mutant
YBR019C	0	0	0.4465	0.447	0.257787	1.29017	0.750262	397.531	YBR019C	GAL10	bifunctional UDP-glucose 4-epimerase/aldose 1-epimerase	ORF	Verified	UDP-glucose-4-epimerase; catalyzes interconversion of UDP-galactose and UDP-D-glucose in galactose metabolism; also catalyzes conversion of alpha-D-glucose or alpha-D-galactose to their beta-anomers; human homolog GALE implicated in galactosemia, can complement yeast null mutant
YBR020W	-0.891	-0.036	0.158	-0.256	0.558131	8.5164	0.373588	2595.29	YBR020W	GAL1	galactokinase	ORF	Verified	Galactokinase; phosphorylates alpha-D-galactose to alpha-D-galactose-1-phosphate in the first step of galactose catabolism; expression regulated by Gal4p; human homolog GALK2 complements yeast null mutant; GAL1 has a paralog, GAL3, that arose from the whole genome duplication
YBR021W	-1.4065	-1.165	-0.607	-1.059	0.410058	0.36564	0.005713	5383.27	YBR021W	FUR4	uracil permease	ORF	Verified	Plasma membrane localized uracil permease; expression is tightly regulated by uracil levels and environmental cues; conformational alterations induced by unfolding or substrate binding result in Rsp5p-mediated ubiquitination and degradation
YBR022W	0.6585	0.394	-0.094	0.319	0.381742	3.75136	0.134495	1389.16	YBR022W	POA1	ADP-ribose 1''-phosphate phosphatase	ORF	Verified	Phosphatase that is highly specific for ADP-ribose 1''-phosphate; a tRNA splicing metabolite; may have a role in regulation of tRNA splicing
YBR023C	-0.2385	-0.075	0.152	-0.054	0.196109	67.2526	0.600133	25727.3	YBR023C	CHS3	chitin synthase CHS3|KTI2|DIT101|CSD2|CAL1	ORF	Verified	Chitin synthase III; catalyzes the transfer of N-acetylglucosamine (GlcNAc) to chitin; required for synthesis of the majority of cell wall chitin, the chitin ring during bud emergence, and spore wall chitosan; contains overlapping di-leucine and di-acidic signals that mediate, respectively, intracellular trafficking by AP-1 and trafficking to plasma membrane by exomer complex; requires AP-3 compl…
YBR024W	0.5015	0.8595	0.376	0.579	0.250894	0.748399	0.007863	19257.7	YBR024W	SCO2	putative thioredoxin peroxidase SCO2	ORF	Verified	Protein anchored to mitochondrial inner membrane; may have a redundant function with Sco1p in delivery of copper to cytochrome c oxidase; interacts with Cox2p; SCO2 has a paralog, SCO1, that arose from the whole genome duplication
YBR025C	-0.1895	-0.197	-0.233	-0.206	0.023254	0.547979	0.018609	18426.8	YBR025C	OLA1	Obg-like ATPase	ORF	Verified	P-loop ATPase with similarity to human OLA1 and bacterial YchF; identified as specifically interacting with the proteasome; null mutant displays increased translation rate and increased readthrough of premature stop codons; protein abundance increases in response to hydrogen peroxide and to DNA replication stress
YBR026C	0.791	0.566	0.3355	0.564	0.227756	0.715996	0.006494	37562	YBR026C	ETR1	MRF1'|MRF1	ORF	Verified	2-enoyl thioester reductase; member of the medium chain dehydrogenase/reductase family; localized to mitochondria, where it has a probable role in fatty acid synthesis; human MECR functionally complements the respiratory growth defect of the null mutant
YBR027C	0.055	-0.412	0.242	-0.038	0.336842	233.27	0.875817	346.435	YBR027C	YBR027C		ORF	Uncharacterized	Putative protein of unknown function; conserved among S. cerevisiae strains; YBR027C is not an essential gene
YBR028C	-0.5375	0.1115	0.2965	-0.043	0.437984	236.876	0.86642	8178.32	YBR028C	YPK3	putative protein kinase YPK3	ORF	Verified	AGC kinase; phosphorylated by cAMP-dependent protein kinase (PKA) in a TORC1-dependent manner; directly phosphorylated by TORC1; phosphorylates ribosomal protein Rps6a/b (S6), in a TORC-dependent manner; undergoes autophosphorylation
YBR029C	-0.851	0.1225	0.1625	-0.189	0.573946	16.0675	0.520948	24333.3	YBR029C	CDS1	phosphatidate cytidylyltransferase|CDG1	ORF	Verified	Phosphatidate cytidylyltransferase (CDP-diglyceride synthetase); an enzyme that catalyzes that conversion of CTP + phosphate into diphosphate + CDP-diaclglyerol, a critical step in the synthesis of all major yeast phospholipids; human homolog CDS1 can complement yeast cds1 null mutant
YBR030W	0.189	-0.3875	-0.098	-0.099	0.288251	29.4104	0.502232	5039.81	YBR030W	RKM3	protein-lysine N-methyltransferase	ORF	Verified	Ribosomal lysine methyltransferase; specific for monomethylation of Rpl42ap and Rpl42bp (lysine 40); nuclear SET domain containing protein; relocalizes to the cytosol in response to hypoxia
YBR031W	-0.579	-0.4185	-0.0815	-0.36	0.253915	1.95922	0.047787	46380.6	YBR031W	RPL4A	uL4|ribosomal 60S subunit protein L4A|L4|rp2|YL2|L4A|L2A	ORF	Verified	Ribosomal 60S subunit protein L4A; N-terminally acetylated; homologous to mammalian ribosomal protein L4 and bacterial L4; RPL4A has a paralog, RPL4B, that arose from the whole genome duplication
YBR032W	-2.972	-2.8985	-2.4855	-2.786	0.262251	0.0337874	0.000223	2652.38	YBR032W	YBR032W		ORF	Uncharacterized	Putative protein of unknown function; conserved among S. cerevisiae strains; YBR032W is not an essential gene
YBR033W	0.24	0.55	0.714	0.501	0.240718	0.959034	0.013151	21337.2	YBR033W	EDS1		ORF	Uncharacterized	Putative zinc cluster protein, predicted to be a transcription factor; not an essential gene; EDS1 has a paralog, RGT1, that arose from the whole genome duplication
YBR034C	0.8865	0.4075	0.557	0.617	0.245072	0.643759	0.005997	3191.84	YBR034C	HMT1	protein-arginine omega-N methyltransferase HMT1|RMT1|ODP1|HCP1	ORF	Verified	Nuclear SAM-dependent mono- and asymmetric methyltransferase; modifies hnRNPs, including Npl3p and Hrp1p, affecting their activity and nuclear export; methylates U1 snRNP protein Snp1p, ribosomal protein Rps2p, and histones H3 and H4; interacts genetically with genes encoding components of Rpd3(L) and this interaction is important for Rpd3 recruitment to the subtelomeric region
YBR035C	0.2015	-0.233	-0.3245	-0.119	0.281021	19.8447	0.451982	42075.5	YBR035C	PDX3	pyridoxamine-phosphate oxidase PDX3	ORF	Verified	Pyridoxine (pyridoxamine) phosphate oxidase; has homologs in E. coli and Myxococcus xanthus; transcription is under the general control of nitrogen metabolism
YBR036C	-0.5145	0.0295	-0.106	-0.197	0.283187	7.29694	0.400578	45871	YBR036C	CSG2	mannosylinositol phosphorylceramide synthase regulatory subunit|CLS2	ORF	Verified	Endoplasmic reticulum membrane protein; required for mannosylation of inositolphosphorylceramide and for growth at high calcium concentrations; protein abundance increases in response to DNA replication stress
YBR037C	0.3	0.5305	0.5885	0.473	0.152603	0.68209	0.003456	11970.4	YBR037C	SCO1	Cu-binding protein SCO1|PET161	ORF	Verified	Copper-binding protein of mitochondrial inner membrane; required for cytochrome c oxidase activity and respiration; may function to deliver copper to cytochrome c oxidase; similar to thioredoxins; SCO1 has a paralog, SCO2, that arose from the whole genome duplication
YBR038W	0.1485	0.367	0.531	0.349	0.191896	1.57549	0.015222	9515.94	YBR038W	CHS2	chitin synthase CHS2	ORF	Verified	Chitin synthase II; catalyzes transfer of N-acetylglucosamine (GlcNAc) to chitin upon activation of zymogenic form; required for chitin synthesis in the primary septum during cytokinesis; localization regulated by Cdk1p during mitosis; phosphorylation by Dbf2p kinase regulates its dynamics and chitin synthesis during cytokinesis
YBR039W	0.23	-0.2265	-0.182	-0.06	0.2517	69.9166	0.666948	47718.7	YBR039W	ATP3	F1F0 ATP synthase subunit gamma	ORF	Verified	Gamma subunit of the F1 sector of mitochondrial F1F0 ATP synthase; F1F0 ATP synthase is a large, evolutionarily conserved enzyme complex required for ATP synthesis
YBR040W	1	0.733	0.43	0.721	0.285189	0.548609	0.014772	746.191	YBR040W	FIG1		ORF	Verified	Integral membrane protein required for efficient mating; may participate in or regulate the low affinity Ca2+ influx system, which affects intracellular signaling and cell-cell fusion during mating
YBR041W	0.2305	0.352	0.075	0.219	0.138847	2.89501	0.078664	9554.56	YBR041W	FAT1	long-chain fatty acid transporter FAT1	ORF	Verified	Very long chain fatty acyl-CoA synthetase and fatty acid transporter; activates imported fatty acids with a preference for very long lengths (C20-C26); has a separate function in the transport of long chain fatty acids
YBR042C	0.4065	0.3625	0.3235	0.364	0.0415251	0.313406	0.020486	1415.1	YBR042C	CST26	putative acyltransferase|PSI1	ORF	Verified	Acyltransferase; enzyme mainly responsible for the introduction of saturated very long chain fatty acids into neo-synthesized molecules of phosphatidylinositol; required for incorporation of stearic acid into phosphatidylinositol; affects chromosome stability when overexpressed; CST26 has a paralog, YDR018C, that arose from the whole genome duplication
YBR043C	0.9515	0.871	1.3675	1.063	0.266473	0.235824	0.001644	9467.41	YBR043C	QDR3	AQR2	ORF	Verified	Multidrug transporter of the major facilitator superfamily; member of the 12-spanner drug:H(+) antiporter DHA1 family; has a role in polyamine homeostasis; involved in spore wall asembly; sequence similarity to DTR1 and QDR1, and the triple mutant dtr1 qdr1 qdr3 exhibits reduced dityrosine fluorescence relative to the single mutants; expression is upregulated under polyamine stress; required for …
YBR044C	-0.019	-0.16	-0.443	-0.207	0.215927	5.03925	0.155528	4518.81	YBR044C	TCM62		ORF	Verified	Protein involved in assembly of the succinate dehydrogenase complex; mitochondrial; putative chaperone
YBR045C	0.085	0.3725	0.157	0.205	0.1496	3.55978	0.037163	4082.24	YBR045C	GIP1	protein phosphatase regulator GIP1	ORF	Verified	Meiosis-specific regulatory subunit of the Glc7p protein phosphatase; regulates spore wall formation and septin organization, required for expression of some late meiotic genes and for normal localization of Glc7p
YBR046C	0.0145	0.342	0.3115	0.223	0.180921	3.63815	0.099936	43811.7	YBR046C	ZTA1	NADPH:quinone reductase	ORF	Verified	NADPH-dependent quinone reductase; GFP-tagged protein localizes to the cytoplasm and nucleus; has similarity to E. coli quinone oxidoreductase and to human zeta-crystallin
YBR047W	0.233	-0.4635	-1.104	-0.445	0.668695	3.37682	0.204135	1872.71	YBR047W	FMP23		ORF	Uncharacterized	Putative protein of unknown function; proposed to be involved in iron or copper homeostasis; the authentic, non-tagged protein is detected in highly purified mitochondria in high-throughput studies
YBR048W	-1.431	-0.855	-0.9295	-1.072	0.31327	0.272602	0.002852	21772.3	YBR048W	RPS11B	uS17|ribosomal 40S subunit protein S11B|S17|rp41B|YS12|S18B|S11B	ORF	Verified	Protein component of the small (40S) ribosomal subunit; homologous to mammalian ribosomal protein S11 and bacterial S17; RPS11B has a paralog, RPS11A, that arose from the whole genome duplication
YBR049C	0.1755	0.5305	0.4215	0.376	0.181853	1.2863	0.018704	6861.02	YBR049C	REB1	DNA-binding protein REB1|GRF2	ORF	Verified	RNA polymerase I enhancer binding protein; DNA binding protein that binds to genes transcribed by both RNA polymerase I and RNA polymerase II; required for termination of RNA polymerase I transcription; Reb1p bound to DNA acts to block RNA polymerase II readthrough transcription
YBR050C	-0.6285	-0.652	-0.801	-0.694	0.0935499	0.194234	0.000386	43789.1	YBR050C	REG2	protein phosphatase regulator REG2	ORF	Verified	Regulatory subunit of the Glc7p type-1 protein phosphatase; involved with Reg1p, Glc7p, and Snf1p in regulation of glucose-repressible genes, also involved in glucose-induced proteolysis of maltose permease; REG2 has a paralog, REG1, that arose from the whole genome duplication
YBR051W	0.0445	0.016	0.2105	0.09	0.105038	12.9677	0.493022	496.824	YBR051W	YBR051W		ORF	Dubious	Dubious open reading frame; unlikely to encode a functional protein, based on available experimental and comparative sequence data; partially overlaps the REG2/YBR050C regulatory subunit of the Glc7p type-1 protein phosphatase
YBR052C	-0.37	-0.159	-0.2955	-0.275	0.107007	1.41497	0.32107	44337.6	YBR052C	RFS1	flavodoxin-like fold family protein	ORF	Verified	Protein of unknown function; member of a flavodoxin-like fold protein family that includes Pst2p and Ycp4p; green fluorescent protein (GFP)-fusion protein localizes to the cytoplasm in a punctate pattern; RFS1 has a paralog, PST2, that arose from the whole genome duplication
YBR053C	-0.16	-0.4535	-0.9255	-0.513	0.386203	1.46751	0.037702	33451.5	YBR053C	YBR053C		ORF	Uncharacterized	Putative protein of unknown function; induced by cell wall perturbation
YBR054W	-3.7865	-1.3465	-1.3425	-2.159	1.40989	0.302469	0.025175	19048.5	YBR054W	YRO2		ORF	Verified	Protein with a putative role in response to acid stress; null mutant is sensitive to acetic acid; transcription is regulated by Haa1p and induced in the presence of acetic acid; protein observed in plasma membrane foci in the presence of acetic acid; the authentic, non-tagged protein is detected in a phosphorylated state in highly purified mitochondria in high-throughput studies
YBR055C	-1.0685	-0.6805	-0.8315	-0.86	0.195582	0.264443	0.001323	10126.6	YBR055C	PRP6	U4/U6-U5 snRNP complex subunit PRP6|TSM7269|RNA6	ORF	Verified	Splicing factor; component of the U4/U6-U5 snRNP complex
YBR056W	0.8265	0.501	0.1755	0.501	0.3255	1.29681	0.026083	31445.8	YBR056W	YBR056W	17-beta-hydroxysteroid dehydrogenase-like protein	ORF	Verified	Putative glycoside hydrolase of the mitochondrial intermembrane space
YBR057C	0.321	0.158	0.1915	0.224	0.0860828	1.71562	0.009429	20474.5	YBR057C	MUM2	SPOT8	ORF	Verified	Protein essential for meiotic DNA replication and sporulation; cytoplasmic protein; subunit of the MIS complex which controls mRNA methylation during during the induction of sporulation; also interacts with Orc2p, which is a component of the origin recognition complex
YBR058C	-0.0905	-0.4195	-0.548	-0.353	0.235959	1.89359	0.029146	14155.3	YBR058C	UBP14	ubiquitin-specific protease UBP14|GID6	ORF	Verified	Ubiquitin-specific protease; specifically disassembles unanchored ubiquitin chains; involved in fructose-1,6-bisphosphatase (Fbp1p) degradation; similar to human isopeptidase T
YBR058C-A	-0.5375	-0.87	-1.4025	-0.937	0.436337	0.496984	0.009794	14014.9	YBR058C-A	TSC3		ORF	Verified	Protein that stimulates the activity of serine palmitoyltransferase; involved in sphingolipid biosynthesis; Lcb1p and Lcb2p are the two components of serine palmitoyltransferase
YBR059C	-0.4615	-0.051	-0.105	-0.206	0.223054	5.25624	0.112305	59102.5	YBR059C	AKL1	serine/threonine protein kinase AKL1	ORF	Verified	Ser-Thr protein kinase; member (with Ark1p and Prk1p) of the Ark kinase family; involved in endocytosis and actin cytoskeleton organization
YBR060C	-0.093	-0.155	0.041	-0.069	0.10018	21.0418	0.246277	6174.12	YBR060C	ORC2	origin recognition complex subunit 2|SIR5|RRR1	ORF	Verified	Subunit of the origin recognition complex (ORC); ORC directs DNA replication by binding to replication origins and is also involved in transcriptional silencing; interacts with Spp1p and with trimethylated histone H3; phosphorylated by Cdc28p
YBR061C	0.0625	0.061	-0.033	0.03	0.0547091	60.7879	0.603121	1609.82	YBR061C	TRM7	tRNA methyltransferase TRM7	ORF	Verified	2'-O-ribose methyltransferase; methylates the 2'-O-ribose of tRNA-Phe, tRNA-Trp, and tRNA-Leu at positions C32 and N34 of tRNA anticodon loop; crucial biological role likely modification of tRNA-Phe; interacts with Trm732p and Rtt10p in 2'-O-methylation of C32 and N34 substrate tRNAs, respectively; yeast null mutant can be functionally complemented by human FTSJ1, mutations in which have been imp…
YBR062C	0.811	0.7745	0.2805	0.622	0.29631	0.765889	0.013215	31238.2	YBR062C	YBR062C		ORF	Uncharacterized	Protein of unknown function that interacts with Msb2p; may play a role in activation of the filamentous growth pathway
YBR063C	-0.985	-0.98	-0.7405	-0.902	0.139741	0.171756	0.00073	2231.25	YBR063C	YBR063C		ORF	Uncharacterized	Putative protein of unknown function; YBR063C is not an essential gene
YBR064W	0	0	0.3425	0.342	0.197742	1.69063	0.47792	303.5	YBR064W	YBR064W		ORF	Dubious	Dubious open reading frame; unlikely to encode a functional protein, based on available experimental and comparative sequence data; partially overlaps the uncharacterized ORF YBR063C
YBR065C	-0.9455	-0.2685	0.026	-0.396	0.498142	3.1766	0.257103	562.151	YBR065C	ECM2	SLT11	ORF	Verified	Pre-mRNA splicing factor; facilitates the cooperative formation of U2/U6 helix II in association with stem II in the spliceosome, function may be regulated by Slu7p
YBR066C	0.7125	0.2145	0.723	0.55	0.290599	0.960658	0.084444	1477.72	YBR066C	NRG2		ORF	Verified	Transcriptional repressor; mediates glucose repression and negatively regulates filamentous growth; activated in stochastic pulses of nuclear localization in response to low glucose
YBR067C	-0.501	-0.0485	-0.1415	-0.23	0.238972	4.51743	0.097787	59456.3	YBR067C	TIP1	putative lipase	ORF	Verified	Major cell wall mannoprotein with possible lipase activity; transcription is induced by heat- and cold-shock; member of the Srp1p/Tip1p family of serine-alanine-rich proteins
YBR068C	-1.1735	0.049	-0.308	-0.478	0.628629	2.7513	0.178333	44032.3	YBR068C	BAP2	branched-chain amino acid permease BAP2	ORF	Verified	High-affinity leucine permease; functions as a branched-chain amino acid permease involved in uptake of leucine, isoleucine and valine; contains 12 predicted transmembrane domains; BAP2 has a paralog, BAP3, that arose from the whole genome duplication
YBR069C	-4.015	-3.582	-3.203	-3.6	0.406299	0.0313502	0.000318	6584.37	YBR069C	TAT1	amino acid transporter TAT1|VAP1|TAP1	ORF	Verified	Amino acid transporter for valine, leucine, isoleucine, and tyrosine; low-affinity tryptophan and histidine transporter; overexpression confers FK506 and FTY720 resistance; protein abundance increases in response to DNA replication stress
YBR070C	1.26	0.887	0.565	0.904	0.347812	0.425606	0.005174	2412.15	YBR070C	ALG14	N-acetylglucosaminyldiphosphodolichol N-acetylglucosaminyltransferase anchoring subunit ALG14	ORF	Verified	Component of UDP-GlcNAc transferase; required for second step of dolichyl-linked oligosaccharide synthesis; anchors catalytic subunit Alg13p to ER membrane; similar to bacterial and human glycosyltransferases; both human homologs ALG13 and ALG14 are required to complement yeast alg14 mutant
YBR071W	-0.3165	0.302	-0.009	-0.008	0.309252	4832.06	0.980398	9339.25	YBR071W	YBR071W		ORF	Verified	Protein of unknown function found in the cytoplasm and bud neck; mRNA expression may be regulated by the cell cycle and/or cell wall stress; overexpression of YBR071W affects endocytic protein trafficking
YBR072W	-0.916	-0.6515	-0.8565	-0.808	0.13876	0.21254	0.017203	37423.3	YBR072W	HSP26	chaperone protein HSP26	ORF	Verified	Small heat shock protein (sHSP) with chaperone activity; forms hollow, sphere-shaped oligomers that suppress unfolded proteins aggregation; long-lived protein that is preferentially retained in mother cells and forms cytoplasmic foci; oligomer activation requires heat-induced conformational change; also has mRNA binding activity
YBR073W	0.7635	0.504	0.7335	0.667	0.141957	0.319084	0.001274	18899.2	YBR073W	RDH54	DNA-dependent ATPase RDH54|TID1	ORF	Verified	DNA-dependent ATPase; DNA recombination/repair translocase, supercoils DNA and promotes DNA strand opening; stimulates strand exchange by modifying dsDNA topology; involved in recombinational repair of DNA double-strand breaks (DSBs) during mitosis and meiosis; phosphorylated in Mec1p-, Rad53p-dependent way in response to one DSB; contributes to remodelling of nucleosomes; proposed to be involved…
YBR074W	-2.465	0.4955	0.455	-0.505	1.69767	6.6569	0.562271	1333.32	YBR074W	PFF1	YBR075W	ORF	Verified	Multi-spanning vacuolar membrane protease; glycosylated transmembrane protein bearing homology to the M28 family of metalloproteases; has a lumenal-facing protease domain; proposed role in vacuole physiology
YBR075W	-0.491	-0.1365	-0.03	-0.219	0.241362	5.03246	0.15088	9218.68	YBR074W	PFF1	probe close to 3' with higher signal; YBR075W	ORF	Verified	Multi-spanning vacuolar membrane protease; glycosylated transmembrane protein bearing homology to the M28 family of metalloproteases; has a lumenal-facing protease domain; proposed role in vacuole physiology
YBR076W	-0.635	-1.081	-0.9375	-0.885	0.227675	0.290689	0.001911	440.544	YBR076W	ECM8		ORF	Verified	Non-essential protein of unknown function
YBR077C	0.035	-0.3955	-0.449	-0.27	0.265345	3.63985	0.126921	553.441	YBR077C	SLM4	GSE1|NIR1|EGO3	ORF	Verified	Component of the EGO and GSE complexes; essential for integrity and function of EGO; EGO is involved in the regulation of microautophagy and GSE is required for proper sorting of amino acid permease Gap1p; gene exhibits synthetic genetic interaction with MSS4
YBR078W	0.209	-0.445	-0.3195	-0.185	0.347078	10.1411	0.399779	39085.1	YBR078W	ECM33		ORF	Verified	GPI-anchored protein of unknown function; possible role in apical bud growth; GPI-anchoring on the plasma membrane crucial to function; phosphorylated in mitochondria; similar to Sps2p; ECM33 has a paralog, PST1, that arose from the whole genome duplication
YBR079C	-0.196	-0.6125	-0.1295	-0.313	0.261783	2.67211	0.092527	1372.15	YBR079C	RPG1	translation initiation factor eIF3 core subunit a|TIF32	ORF	Verified	eIF3a subunit of the eukaryotic translation initiation factor 3 (eIF3); subunit of the core complex of eIF3; essential for translation; part of a Prt1p-Rpg1p-Nip1p subcomplex that stimulates binding of mRNA and tRNA(i)Met to ribosomes; involved in translation reinitiation; eIF3 is also involved in programmed stop codon readthrough
YBR080C	-0.767	-0.1635	-0.0785	-0.336	0.375382	3.32502	0.117814	29849.9	YBR080C	SEC18	AAA family ATPase SEC18|ANU4	ORF	Verified	AAA ATPase and SNARE disassembly chaperone; required for vesicular transport between ER and Golgi, the 'priming' step in homotypic vacuole fusion, autophagy, and protein secretion; releases Sec17p from SNAP complexes; has similarity to mammalian N-ethylmaleimide-sensitive factor (NSF)
YBR081C	-0.1305	-0.115	-0.014	-0.086	0.0632633	8.55372	0.339853	30912.5	YBR081C	SPT7	SAGA histone acetyltransferase complex subunit SPT7|GIT2	ORF	Verified	Subunit of the SAGA transcriptional regulatory complex; involved in proper assembly of the complex; also present as a C-terminally truncated form in the SLIK/SALSA transcriptional regulatory complex
YBR082C	0.2885	-0.056	-0.084	0.05	0.207453	82.9812	0.672295	22658	YBR082C	UBC4	E2 ubiquitin-conjugating protein UBC4	ORF	Verified	Ubiquitin-conjugating enzyme (E2); key E2 partner with Ubc1p for the anaphase-promoting complex (APC); mediates degradation of abnormal or excess proteins, including calmodulin and histone H3; regulates levels of DNA Polymerase-{alpha} to promote efficient and accurate DNA replication; interacts with many SCF ubiquitin protein ligases; component of the cellular stress response; UBC4 has a paralog…
YBR083W	0.973	1.169	1.089	1.077	0.0985495	0.0849616	0.00017	32059.5	YBR083W	TEC1	ROC1	ORF	Verified	Transcription factor targeting filamentation genes and Ty1 expression; Ste12p activation of most filamentation gene promoters depends on Tec1p and Tec1p transcriptional activity is dependent on its association with Ste12p; binds to TCS elements upstream of filamentation genes, which are regulated by Tec1p/Ste12p/Dig1p complex; competes with Dig2p for binding to Ste12p/Dig1p; positive regulator of…
YBR084C-A	-0.773	-0.491	-0.657	-0.64	0.141737	0.346037	0.002591	18013.5	YBR084C-A	RPL19A	eL19|ribosomal 60S subunit protein L19A|L19e|rpl5L|YL14|L23A|L19A	ORF	Verified	Ribosomal 60S subunit protein L19A; rpl19a and rpl19b single null mutations result in slow growth, while the double null mutation is lethal; homologous to mammalian ribosomal protein L19, no bacterial homolog; RPL19A has a paralog, RPL19B, that arose from the whole genome duplication
YBR084W	-0.759	-0.805	-1.1345	-0.9	0.204811	0.252854	0.001375	19693.9	YBR084W	MIS1	trifunctional formate-tetrahydrofolate ligase/methenyltetrahydrofolate cyclohydrolase/methylenetetrahydrofolate dehydrogenase MIS1	ORF	Verified	Mitochondrial C1-tetrahydrofolate synthase; involved in interconversion between different oxidation states of tetrahydrofolate (THF); provides activities of formyl-THF synthetase, methenyl-THF cyclohydrolase, and methylene-THF dehydrogenase
YBR085C-A	-0.1055	-0.3285	-0.707	-0.38	0.304082	2.10583	0.045094	3266.74	YBR085C-A	YBR085C-A		ORF	Verified	Protein of unknown function; green fluorescent protein (GFP)-fusion protein localizes to the cytoplasm and to the nucleus; protein abundance increases in response to DNA replication stress
YBR085W	1.393	1.039	1.1115	1.181	0.187	0.134073	0.00104	1141.79	YBR085W	AAC3	ADP/ATP carrier protein AAC3|ANC3	ORF	Verified	Mitochondrial inner membrane ADP/ATP translocator; exchanges cytosolic ADP for mitochondrially synthesized ATP; expressed under anaerobic conditions; similar to Aac1p; has roles in maintenance of viability and in respiration; AAC3 has a paralog, PET9, that arose from the whole genome duplication
YBR086C	-0.494	-0.1815	-0.456	-0.377	0.170514	1.19971	0.019403	31595.5	YBR086C	IST2		ORF	Verified	Cortical ER protein involved in ER-plasma membrane tethering; one of 6 proteins (Ist2p, Scs2p, Scs22p, Tcb1p, Tcb2p, Tcb3p) that connect ER to the plasma membrane (PM) and regulate PM phosphatidylinositol-4-phosphate (PI4P) levels by controlling access of Sac1p phosphatase to its substrate PI4P in the PM; localizes to the mother cell in small-budded cells and to the bud in medium- and large-budde…
YBR087W	0.75	-0.1	0.125	0.258	0.440407	6.61629	0.328411	403.426	YBR087W	RFC5	replication factor C subunit 5	ORF	Verified	Subunit of heteropentameric Replication factor C (RF-C); RF-C is a DNA binding protein and ATPase that acts as a clamp loader of the proliferating cell nuclear antigen (PCNA) processivity factor for DNA polymerases delta and epsilon
YBR088C	1.3385	0.7165	0.709	0.921	0.361296	0.425936	0.005431	4353.68	YBR088C	POL30	proliferating cell nuclear antigen|PCNA	ORF	Verified	Proliferating cell nuclear antigen (PCNA); functions as the sliding replication clamp for DNA polymerase delta; may function as a docking site for other proteins required for mitotic and meiotic chromosomal DNA replication and for DNA repair; PCNA ubiquitination at K164 plays a crucial role during Okazaki fragment processing
YBR089C-A	0.2915	-0.3225	-0.815	-0.282	0.554361	6.97099	0.314056	29846.2	YBR089C-A	NHP6B	high-mobility group nucleosome-binding protein|YBR090C-A	ORF	Verified	High-mobility group (HMG) protein; binds to and remodels nucleosomes; involved in recruiting FACT and other chromatin remodelling complexes to the chromosomes; functionally redundant with Nhp6Ap; required for transcriptional initiation fidelity of some tRNA genes; homologous to mammalian HMGB1 and HMGB2; NHP6B has a paralog, NHP6A, that arose from the whole genome duplication
YBR089W	0	0	-0.1695	-0.169	0.0978609	3.42638	0.841954	348.917	YBR089W	YBR089W		ORF	Dubious	Dubious open reading frame; unlikely to encode a functional protein, based on available experimental and comparative sequence data; almost completely overlaps the verified gene POL30
YBR090C	0.753	0.462	-0.0815	0.378	0.423569	2.96442	0.180596	479.682	YBR090C	YBR090C		ORF	Uncharacterized	Putative protein of unknown function; green fluorescent protein (GFP)-fusion protein localizes to the cytoplasm and nucleus
YBR091C	0.968	-0.019	0.0465	0.332	0.551909	5.00716	0.24391	1451.31	YBR091C	TIM12	MRS5	ORF	Verified	Essential protein of the inner mitochondrial membrane; peripherally localized; component of the TIM22 complex, which is a twin-pore translocase that mediates insertion of numerous multispanning inner membrane proteins
YBR092C	-1.287	-1.2265	-0.9325	-1.149	0.189634	0.14364	0.000854	1751.53	YBR092C	PHO3	acid phosphatase PHO3|phoC	ORF	Verified	Constitutively expressed acid phosphatase similar to Pho5p; brought to the cell surface by transport vesicles; hydrolyzes thiamin phosphates in the periplasmic space, increasing cellular thiamin uptake; expression is repressed by thiamin
YBR093C	-0.404	-0.31	-0.538	-0.417	0.114583	0.658945	0.008634	2363.97	YBR093C	PHO5	acid phosphatase PHO5|phoE	ORF	Verified	Repressible acid phosphatase; 1 of 3 repressible acid phosphatases that also mediates extracellular nucleotide-derived phosphate hydrolysis; secretory pathway derived cell surface glycoprotein; induced by phosphate starvation and coordinately regulated by PHO4 and PHO2
YBR094W	-0.254	0.3595	0.027	0.044	0.30711	158.631	0.80171	2676.97	YBR094W	PBY1	putative tubulin tyrosine ligase	ORF	Verified	Putative tubulin tyrosine ligase associated with P-bodies; may have a role in mRNA metabolism; yeast knockout collection strain identified as a pby1 null mutant is actually wild-type for PBY1 and deleted for mms4
YBR095C	0.4185	0.271	0.416	0.368	0.0844467	0.623573	0.002404	7750.03	YBR095C	RXT2	RAF60	ORF	Verified	Component of the histone deacetylase Rpd3L complex; possibly involved in cell fusion and invasive growth; relocalizes to the cytosol in response to hypoxia
YBR096W	0.366	-0.4715	-0.4565	-0.187	0.479259	13.7053	0.442845	1244.38	YBR096W	YBR096W		ORF	Uncharacterized	Putative protein of unknown function; green fluorescent protein (GFP)-fusion protein localizes to the ER
YBR097W	-0.672	-0.0525	-0.0435	-0.256	0.360295	5.49766	0.190471	6529	YBR097W	VPS15	ubiquitin-binding serine/threonine protein kinase VPS15|VPT15|VPS40|VPL19|VAC4|GRD8	ORF	Verified	Serine/threonine protein kinase involved in vacuolar protein sorting; functions as a membrane-associated complex with Vps34p; active form recruits Vps34p to the Golgi membrane; interacts with the GDP-bound form of Gpa1p; myristoylated; a fraction is localized, with Vps34p, to nuclear pores at nucleus-vacuole junctions and may facilitate transcription elongation for genes positioned at the nuclear…
YBR098W	-0.404	0.4845	0.4855	0.189	0.513265	14.3687	0.465692	893.132	YBR098W	MMS4	YBR100W|SLX2	ORF	Verified	Subunit of structure-specific Mms4p-Mus81p endonuclease; cleaves branched DNA; involved in recombination, DNA repair, and joint molecule formation/resolution during meiotic recombination; phosphorylation of the non-catalytic subunit Mms4p by Cdc28p and Cdc5p during mitotic cell cycle activates the function of Mms4p-Mus81p
YBR099C	-1.005	0.0035	0.229	-0.257	0.657099	9.94867	0.451311	10728.3	YBR099C	YBR099C		ORF	Dubious	Dubious open reading frame; unlikely to encode a functional protein, based on available experimental and comparative sequence data; completely overlaps the verified gene MMS4
YBR100W	0.058	0.1175	0.1975	0.124	0.0700006	4.55259	0.121865	2860.16	YBR098W	MMS4	YBR100W|SLX2	ORF	Verified	Subunit of structure-specific Mms4p-Mus81p endonuclease; cleaves branched DNA; involved in recombination, DNA repair, and joint molecule formation/resolution during meiotic recombination; phosphorylation of the non-catalytic subunit Mms4p by Cdc28p and Cdc5p during mitotic cell cycle activates the function of Mms4p-Mus81p
YBR101C	0.8145	0.2675	0.777	0.619	0.305561	0.797474	0.011587	24424.1	YBR101C	FES1		ORF	Verified	Hsp70 (Ssa1p) nucleotide exchange factor; required for the release of misfolded proteins from the Hsp70 system to the Ub-proteasome machinery for destruction; cytosolic homolog of Sil1p, which is the nucleotide exchange factor for BiP (Kar2p) in the endoplasmic reticulum; protein abundance increases in response to DNA replication stress
YBR102C	-0.2025	0.2365	0.0595	0.031	0.220867	229.831	0.800676	1674.52	YBR102C	EXO84	exocyst subunit EXO84|USA3	ORF	Verified	Exocyst subunit with dual roles in exocytosis and spliceosome assembly; subunit of the the exocyst complex which mediates polarized targeting and tethering of post-Golgi secretory vesicles to active sites of exocytosis at the plasma membrane (PM) prior to SNARE-mediated fusion; required for exocyst assembly and targeting the complex to specific sites on the bud tip PM; associates the U1 snRNP; ro…
YBR103C-A	0	0	3.167	3.167	1.82847	0.182302	1	261.206	YBR103C-A	YBR103C-A		ORF	Dubious	Dubious open reading frame; unlikely to encode a functional protein, based on available experimental and comparative sequence data; identified by homology to related yeast
YBR103W	0.151	0.1395	0.2745	0.188	0.0748437	2.11758	0.021006	25194.2	YBR103W	SIF2	EMB1	ORF	Verified	WD40 repeat-containing subunit of Set3C histone deacetylase complex; complex represses early/middle sporulation genes; antagonizes telomeric silencing; binds specifically to the Sir4p N-terminus
YBR104W	1.8035	1.1375	1.316	1.419	0.34474	0.171209	0.00141	20113	YBR104W	YMC2	organic acid transporter	ORF	Verified	Putative mitochondrial inner membrane transporter; proposed role in oleate metabolism and glutamate biosynthesis; member of the mitochondrial carrier (MCF) family; YMC2 has a paralog, YMC1, that arose from the whole genome duplication
YBR105C	-0.9475	-0.3255	0.1975	-0.359	0.573213	4.44761	0.229715	4763.4	YBR105C	VID24	glucose-induced degradation complex subunit VID24|GID4	ORF	Verified	GID Complex regulatory subunit; binds GID Complex in response to glucose through interactions with complex member Vid28p; regulates fructose-1,6-bisphosphatase (FBPase) targeting to the vacuole; promotes proteasome-dependent catabolite degradation of FBPase; peripheral membrane protein located at Vid (vacuole import and degradation) vesicles
YBR106W	-0.0865	0.3385	0.1575	0.136	0.213277	11.531	0.239545	14229.1	YBR106W	PHO88	SND3	ORF	Verified	Protein involved in SRP-independent targeting of substrates to the ER; component of an alternative ER targeting pathway that has partial functional redundancy with the GET pathway; preference for substrates with downstream transmembrane domains; interacts with Snd1p, Env10p/Snd2p, and Sec61p-translocon subunits; can compensate for loss of SRP; role in phosphate transport, interacting with pho88, …
YBR107C	0.193	-0.196	-0.246	-0.083	0.240327	34.8856	0.540946	2759.28	YBR107C	IML3	MCM19	ORF	Verified	Outer kinetochore protein and component of the Ctf19 complex; involved in the establishment of pericentromeric cohesion during mitosis; prevents non-disjunction of sister chromatids during meiosis II; forms a stable complex with Chl4p; required for localization of Sgo1p to pericentric sites during meiosis I; orthologous to human centromere constitutive-associated network (CCAN) subunit CENP-L and…
YBR108W	-1.055	-0.3445	0.0305	-0.456	0.551323	2.65141	0.175989	679.132	YBR108W	AIM3		ORF	Verified	Protein that inhibits barbed-end actin filament elongation; interacts with Rvs167p; null mutant is viable and displays elevated frequency of mitochondrial genome loss
YBR109C	0.218	-0.1695	-0.4405	-0.131	0.330963	19.2858	0.453269	10593.3	YBR109C	CMD1	calmodulin|CaM	ORF	Verified	Calmodulin; Ca2+ binding protein that regulates Ca2+ independent processes (mitosis, bud growth, actin organization, endocytosis, etc.) and Ca2+ dependent processes (stress-activated pathways), targets include Nuf1p, Myo2p and calcineurin; binds to the Hog1p MAPK in response to hyperosmotic stress; potentiates membrane tubulation and constriction mediated by the Rvs161p-Rvs167p complex; human CAL…
YBR110W	-0.627	-0.539	-0.6115	-0.592	0.0469761	0.13404	0.001498	4622.94	YBR110W	ALG1	chitobiosyldiphosphodolichol beta-1,4 mannosyltransferase	ORF	Verified	Mannosyltransferase; involved in asparagine-linked glycosylation in the endoplasmic reticulum (ER); essential for viability; human homolog ALG1 complements yeast null mutant
YBR111C	0.808	0.8845	0.564	0.752	0.167386	0.295994	0.001292	43040.2	YBR111C	YSA1	ADP-ribose diphosphatase|RMA2	ORF	Verified	Nudix hydrolase family member with ADP-ribose pyrophosphatase activity; shown to metabolize O-acetyl-ADP-ribose to AMP and acetylated ribose 5'-phosphate
YBR112C	0.848	0.6475	0.862	0.786	0.120005	0.194246	0.00116	30487.5	YBR112C	CYC8	transcription regulator CYC8|[OCT]|[OCT1+]|SSN6|CRT8	ORF	Verified	General transcriptional co-repressor; acts together with Tup1p; also acts as part of a transcriptional co-activator complex that recruits the SWI/SNF and SAGA complexes to promoters; can form the prion [OCT+]
YBR113W	0.718	0.731	-0.109	0.447	0.481265	2.40863	0.142299	339.926	YBR113W	YBR113W		ORF	Dubious	Dubious open reading frame; unlikely to encode a functional protein, based on available experimental and comparative sequence data; partially overlaps the verified gene CYC8
YBR114W	-0.1645	-0.151	0.205	-0.037	0.209543	153.062	0.764687	11096.8	YBR114W	RAD16	DNA repair protein RAD16|PSO5	ORF	Verified	Nucleotide excision repair (NER) protein; binds damaged DNA during NER; binds DNA in an ATP-dependent manner (with Rad7p) during NER; required for NER of non-transcribed chromatin; subunit of Nucleotide Excision Repair Factor 4 (NEF4) and the Elongin-Cullin-Socs (ECS) ligase complex
YBR115C	0.06	-0.682	-0.4105	-0.344	0.375421	3.1725	0.101415	30711.1	YBR115C	LYS2	L-aminoadipate-semialdehyde dehydrogenase	ORF	Verified	Alpha aminoadipate reductase; catalyzes the reduction of alpha-aminoadipate to alpha-aminoadipate 6-semialdehyde, which is the fifth step in biosynthesis of lysine; activation requires posttranslational phosphopantetheinylation by Lys5p
YBR116C	-4.051	-2.859	-2.166	-3.025	0.953444	0.104194	0.003276	50167	YBR116C	YBR116C		ORF	Dubious	Dubious open reading frame; unlikely to encode a functional protein, based on available experimental and comparative sequence data; partially overlaps the verified gene TKL2
YBR117C	-4.0375	-2.5985	-2.0095	-2.882	1.04327	0.125605	0.004327	30840.1	YBR117C	TKL2	transketolase TKL2	ORF	Verified	Transketolase; catalyzes conversion of xylulose-5-phosphate and ribose-5-phosphate to sedoheptulose-7-phosphate and glyceraldehyde-3-phosphate in the pentose phosphate pathway; needed for synthesis of aromatic amino acids; TKL2 has a paralog, TKL1, that arose from the whole genome duplication
YBR118W	-0.6425	-0.6675	-0.3665	-0.559	0.167034	0.534541	0.072092	54951.2	YBR118W	TEF2	translation elongation factor EF-1 alpha|eEF1A|EF-1 alpha	ORF	Verified	Translational elongation factor EF-1 alpha; in the GTP-bound active form, binds to and delivers aminoacylated tRNA to the A-site of ribosomes for elongation of nascent polypeptides; associates with vacuolar Rho1p GTPase; TEF2-RFP levels increase during replicative aging; may also have a role in tRNA re-export from the nucleus; TEF2 has a paralog, TEF1, that arose from the whole genome duplication
YBR119W	0.117	-0.4285	-0.401	-0.238	0.307314	5.42535	0.172806	14032.3	YBR119W	MUD1	U1A|U1-A	ORF	Verified	U1 snRNP A protein; homolog of human U1-A; involved in nuclear mRNA splicing
YBR120C	1.6075	1.076	0.2855	0.99	0.665215	0.678722	0.039442	421.815	YBR120C	CBP6		ORF	Verified	Mitochondrial protein required for translation of the COB mRNA; forms a complex with Cbp3p that binds to mt ribosomes near the polypeptide tunnel exit and promotes efficient translation of the COB mRNA; Cbp3p-Cbp6p complex also interacts with newly synthesized cytochrome b (Cobp) and Cbp4p to promote assembly of Cobp into the cytochrome bc1 complex; Cbp3p-Cbp6p complex is sequestered if assembly …
YBR121C	0.1375	-0.054	-0.1535	-0.023	0.147904	279.592	0.841954	50271.9	YBR121C	GRS1	glycine--tRNA ligase	ORF	Verified	Cytoplasmic and mitochondrial glycyl-tRNA synthase; ligates glycine to the cognate anticodon-bearing tRNA; transcription termination factor that may interact with the 3'-end of pre-mRNA to promote 3'-end formation; GRS1 has a paralog, GRS2, that arose from the whole genome duplication; human homolog GARS implicated in Charcot-Marie-Tooth disease, can complement yeast null mutant
YBR122C	0.728	0.3615	-0.2075	0.294	0.471389	5.45361	0.266537	2043.07	YBR122C	MRPL36	mitochondrial 54S ribosomal protein YmL36|YmL36	ORF	Verified	Mitochondrial ribosomal protein of the large subunit; overproduction suppresses mutations in the COX2 leader peptide-encoding region
YBR123C	0.7625	0.201	0.4195	0.461	0.283041	1.33183	0.023166	2634.59	YBR123C	TFC1	transcription factor TFIIIC subunit TFC1|tau 95	ORF	Verified	Subunit of RNA polymerase III transcription initiation factor complex; one of six subunits of the RNA polymerase III transcription initiation factor complex (TFIIIC); part of the TauA globular domain of TFIIIC that binds DNA at the BoxA promoter sites of tRNA and similar genes; human homolog is TFIIIC-63
YBR124W	-0.3	-0.5065	-0.9165	-0.629	0.313798	0.793138	0.110895	257.914	YBR124W	YBR124W		ORF	Dubious	Putative protein of unknown function
YBR125C	-0.424	0.012	0.1825	-0.077	0.312785	52.7552	0.648144	3213.15	YBR125C	PTC4	type 2C protein phosphatase PTC4|GCT1	ORF	Verified	Cytoplasmic type 2C protein phosphatase (PP2C); identified as a high-copy number suppressor of cnb1 mpk1 synthetic lethality; overexpression decreases high-osmolarity induced Hog1p phosphorylation and kinase activity
YBR126C	-0.7765	-0.305	-0.353	-0.478	0.259477	1.13564	0.016727	53673.8	YBR126C	TPS1	alpha,alpha-trehalose-phosphate synthase (UDP-forming) TPS1|TSS1|GLC6|GGS1|FDP1|CIF1|BYP1	ORF	Verified	Synthase subunit of trehalose-6-P synthase/phosphatase complex; synthesizes the storage carbohydrate trehalose, which is critically important for survival of long-term desiccation; also found in a monomeric form; expression is induced by the stress response and repressed by the Ras-cAMP pathway; protein abundance increases in response to DNA replication stress and in response to prolonged exposur…
YBR127C	-0.9785	0.3135	0.374	-0.097	0.764	81.1989	0.823962	50507.9	YBR127C	VMA2	H(+)-transporting V1 sector ATPase subunit B|ATPSV|VAT2	ORF	Verified	Subunit B of V1 peripheral membrane domain of vacuolar H+-ATPase; electrogenic proton pump found throughout the endomembrane system; contains nucleotide binding sites; also detected in the cytoplasm; protein abundance increases in response to DNA replication stress; human homolog ATP6V1B1, implicated in autosomal-recessive distal renal tubular acidosis (RTA) with sensorineural deafness, complemen…
YBR128C	0.0145	-0.214	-0.346	-0.182	0.18239	5.50628	0.10509	887.132	YBR128C	ATG14	APG14|CVT12	ORF	Verified	Autophagy-specific subunit of phosphatidylinositol 3-kinase complex I; Atg14p targets complex I to the phagophore assembly site (PAS); required for localizing additional ATG proteins to the PAS; required for overflow degradation of misfolded proteins when ERAD is saturated; homolog of human Barkor; other members are Vps34, Vps15, and Vps30p
YBR129C	-0.6825	-0.417	-0.619	-0.573	0.13864	0.42226	0.007413	5953.32	YBR129C	OPY1		ORF	Verified	Protein of unknown function; overproduction blocks cell cycle arrest in the presence of mating pheromone; the authentic, non-tagged protein is detected in highly purified mitochondria in high-throughput studies
YBR130C	0.356	-0.151	0.256	0.154	0.268545	11.3234	0.317884	2112.35	YBR130C	SHE3		ORF	Verified	Protein adaptor between Myo4p and the She2p-mRNA complex; part of the mRNA localization machinery that restricts accumulation of certain proteins to the bud; also required for cortical ER inheritance
YBR131W	0.0765	0.0355	0.2795	0.131	0.130656	7.61354	0.121134	8701.32	YBR131W	CCZ1	CVT16	ORF	Verified	Subunit of a heterodimeric guanine nucleotide exchange factor (GEF); subunit of the Mon1-Ccz1 GEF complex, which stimulates nucleotide exchange and activation of Ypt7p, a Rab family GTPase involved in membrane tethering and fusion events at the late endosome and vacuole; GEF activity is stimulated by membrane association and anionic phospholipids; involved in localizing Ypt7p to the vacuolar memb…
YBR132C	-3.78	-1.86	-2.0155	-2.552	1.06646	0.163751	0.007682	2322.18	YBR132C	AGP2		ORF	Verified	Plasma membrane regulator of polyamine and carnitine transport; has similarity to transporters but lacks transport activity; may act as a sensor that transduces environmental signals; has a positive or negative regulatory effect on transcription of many transporter genes
YBR133C	0.562	0.648	0.689	0.633	0.0648151	0.161759	0.002399	4694.85	YBR133C	HSL7	protein arginine N-methyltransferase	ORF	Verified	Protein arginine N-methyltransferase; exhibits septin and Hsl1p-dependent localization to the bud neck in budded cells and periodic Hsl1p-dependent phosphorylation; required with Hsl1p, and Elm1p for the mother-bud neck recruitment, phosphorylation, and degradation of Swe1p; interacts directly with Swe1p; relocalizes away from bud neck upon DNA replication stress; human homolog PRMT5 can compleme…
YBR134W	-0.175	-0.78	0.5515	0.037	0.666673	486.978	0.978452	327.026	YBR134W	YBR134W		ORF	Dubious	Dubious open reading frame; unlikely to encode a functional protein, based on available experimental and comparative sequence data
YBR135W	0.6145	0.1765	-0.2935	0.166	0.454094	16.479	0.471397	1620.91	YBR135W	CKS1	cyclin-dependent protein kinase regulatory subunit CKS1	ORF	Verified	Cyclin-dependent protein kinase regulatory subunit and adaptor; interacts with Cdc28p (aka Cdk1p); required for G1/S and G2/M phase transitions and budding; mediates phosphorylation and degradation of Sic1p; modulates proteolysis of M-phase targets through interactions with the proteasome; role in transcriptional regulation, recruiting proteasomal subunits to target gene promoters; human homologs…
YBR136W	0.3085	0.2535	-0.1765	0.129	0.265565	15.9585	0.352487	1332	YBR136W	MEC1	protein kinase MEC1|RAD31|SAD3|ESR1	ORF	Verified	Genome integrity checkpoint protein and PI kinase superfamily member; Mec1p and Dun1p function in same pathway to regulate dNTP pools and telomere length; signal transducer required for cell cycle arrest and transcriptional responses to damaged or unreplicated DNA; facilitates replication fork progression and regulates P-body formation under replication stress; promotes interhomolog recombination…
YBR137W	0.6965	0.148	-0.622	0.074	0.662344	120.954	0.845921	6226.41	YBR137W	YBR137W		ORF	Verified	Protein with a role in ER delivery of tail-anchored membrane proteins; interacts with Sgt2p; binds to the TRC complex, which inserts proteins into the ER membrane; interacts with Msn5p karyopherin; YBR137W is not an essential gene
YBR138C	0.469	0.0815	-0.1585	0.131	0.316626	18.4503	0.425443	6993.91	YBR138C	YBR138C	HDR1	ORF	Uncharacterized	Cytoplasmic protein of unknown function; APCC(Cdh1) substrate; potentially phosphorylated by Cdc28p; YBR138C is not an essential gene
YBR139W	0.3105	0.4645	0.359	0.378	0.0787385	0.551066	0.002086	31415.3	YBR139W	YBR139W	carboxypeptidase C	ORF	Verified	Putative serine type carboxypeptidase; role in phytochelatin synthesis; green fluorescent protein (GFP)-fusion protein localizes to the vacuole; expression induced by nitrogen limitation in a GLN3, GAT1-independent manner
YBR140C	-0.5355	-0.395	-0.2055	-0.379	0.165605	1.15291	0.013289	28156.5	YBR140C	IRA1	GTPase-activating protein IRA1|PPD1|GLC1	ORF	Verified	GTPase-activating protein; negatively regulates RAS by converting it from GTP- to the GDP-bound inactive form, required for reducing cAMP levels under nutrient limiting conditions, mediates membrane association of adenylate cyclase; mutations cause catalase T deficiency, defective glycogen synthesis and defective trehalose accumulation; IRA1 has a paralog, IRA2, that arose from the whole genome d…
YBR141C	0.1355	-0.7285	-0.219	-0.271	0.434311	5.91374	0.229882	4395.25	YBR141C	BMT2	25S rRNA (adenine2142-N1)-methyltransferase	ORF	Verified	Nucleolar S-adenosylmethionine-dependent rRNA methyltransferase; methylates adenine (m1A) of the large subunit (LSU) rRNA at position 2142; belongs to Rossmann fold superfamily; green fluorescent protein (GFP)-fusion protein localizes to the nucleolus; YBR141C is not an essential gene
YBR142W	-0.3515	-0.2875	-0.235	-0.291	0.0583445	0.688992	0.002992	4248.79	YBR142W	MAK5	putative ATP-dependent RNA helicase	ORF	Verified	Essential nucleolar protein; putative DEAD-box RNA helicase required for maintenance of M1 dsRNA virus; involved in biogenesis of large (60S) ribosomal subunits
YBR143C	-0.2625	-0.0715	-0.098	-0.144	0.103476	4.99015	0.112986	19482.9	YBR143C	SUP45	translation termination factor eRF1|eRF1|SUP47|SUP1|SAL4	ORF	Verified	Polypeptide release factor (eRF1) in translation termination; mutant form acts as a recessive omnipotent suppressor; methylated by Mtq2p-Trm112p in ternary complex eRF1-eRF3-GTP; mutation of methylation site confers resistance to zymocin; has a role in cytokinesis through interaction with Mlc1p
YBR144C	0	0	-0.196	-0.196	0.113161	2.94566	0.032647	417.118	YBR144C	YBR144C		ORF	Dubious	Dubious open reading frame; unlikely to encode a functional protein, based on available experimental and comparative sequence data; YBR144C is not an essential gene
YBR145W	-0.8785	-1.3455	-1.111	-1.112	0.233501	0.188833	0.00136	37203.6	YBR145W	ADH5	alcohol dehydrogenase ADH5	ORF	Verified	Alcohol dehydrogenase isoenzyme V; involved in ethanol production; ADH5 has a paralog, ADH1, that arose from the whole genome duplication
YBR146W	0.523	0.809	0.463	0.598	0.184893	0.517032	0.004034	3342.06	YBR146W	MRPS9	mitochondrial 37S ribosomal protein MRPS9	ORF	Verified	Mitochondrial ribosomal protein of the small subunit
YBR147W	-0.188	-0.4235	-0.4565	-0.356	0.146425	1.15535	0.007918	45857.5	YBR147W	RTC2	cationic amino acid transporter|YPQ3|RRT11	ORF	Verified	Putative vacuolar membrane transporter for cationic amino acids; likely contributes to amino acid homeostasis by exporting cationic amino acids from the vacuole; positive regulation by Lys14p suggests that lysine may be the primary substrate; member of the PQ-loop family, with seven transmembrane domains; similar to mammalian PQLC2 vacuolar transporter; RTC2 has a paralog, YPQ1, that arose from t…
YBR148W	-0.731	-0.4595	-0.0985	-0.43	0.317304	1.71608	0.065775	15805.7	YBR148W	YSW1		ORF	Verified	Protein required for normal prospore membrane formation; interacts with Gip1p, which is the meiosis-specific regulatory subunit of the Glc7p protein phosphatase; expressed specifically in spores and localizes to the prospore membrane; YSW1 has a paralog, SPO21, that arose from the whole genome duplication
YBR149W	-0.1115	0.4075	0.379	0.225	0.291766	5.76327	0.181182	46430.4	YBR149W	ARA1	D-arabinose 1-dehydrogenase (NAD(P)(+)) ARA1	ORF	Verified	NADP+ dependent arabinose dehydrogenase; involved in carbohydrate metabolism; purified as homodimer; naturally occurs with a N-terminus degradation product
YBR150C	-2.036	-1.5265	-1.288	-1.617	0.382094	0.146134	0.001777	5435.65	YBR150C	TBS1		ORF	Verified	Protein of unknown function; the authentic, non-tagged protein is detected in highly purified mitochondria in high-throughput studies; TBS1 has a paralog, HAL9, that arose from the whole genome duplication
YBR151W	-0.6055	-0.331	-0.4445	-0.46	0.137933	0.651858	0.005141	51872.5	YBR151W	APD1		ORF	Verified	Protein of unknown function; required for normal localization of actin patches and for normal tolerance of sodium ions and hydrogen peroxide; localizes to both cytoplasm and nucleus
YBR152W	-0.3725	0.134	0.3395	0.034	0.366451	316.999	0.880313	640.603	YBR152W	SPP381	U4/U6-U5 snRNP complex subunit SPP381	ORF	Verified	mRNA splicing factor, component of U4/U6.U5 tri-snRNP; interacts genetically and physically with Prp38p; relocalizes to the cytosol in response to hypoxia
YBR153W	0.409	0.3605	0.4845	0.418	0.062488	0.357638	0.000835	12012.7	YBR153W	RIB7	2,5-diamino-6-(ribosylamino)-4(3H)-pyrimidinone 5'-phosphate reductase	ORF	Verified	Diaminohydroxyphoshoribosylaminopyrimidine deaminase; catalyzes the second step of the riboflavin biosynthesis pathway
YBR154C	0.6615	-0.2005	-0.3	0.053	0.528745	188.232	0.864694	1170.25	YBR154C	RPB5	DNA-directed RNA polymerase core subunit RPB5|ABC27	ORF	Verified	RNA polymerase subunit ABC27; common to RNA polymerases I, II, and III; contacts DNA and affects transactivation
YBR155W	1.271	0.4205	0.847	0.846	0.425251	0.594161	0.011892	4030.12	YBR155W	CNS1	HSP70/90 family co-chaperone CNS1	ORF	Verified	TPR-containing co-chaperone; binds both Hsp82p (Hsp90) and Ssa1p (Hsp70); stimulates ATPase activity of Ssa1p; ts mutants reduce Hsp82p function, overexpression suppresses phenotypes of HSP82 ts allele and cpr7 deletion; human homolog TTC4 complements yeast cns1 mutant
YBR156C	-0.3515	0.2855	0.592	0.175	0.481301	15.7159	0.491853	958.809	YBR156C	SLI15		ORF	Verified	Subunit of the conserved chromosomal passenger complex (CPC); complex regulates kinetochore-microtubule attachments, activation of the spindle tension checkpoint, and mitotic spindle disassembly; other complex members are Ipl1p, Bir1p, and Nbl1p
YBR157C	-1.654	-0.151	-0.72	-0.842	0.758851	1.07037	0.063312	3939.59	YBR157C	ICS2		ORF	Verified	Protein of unknown function; null mutation does not confer any obvious defects in growth, spore germination, viability, or carbohydrate utilization
YBR158W	0.468	1.2275	0.8545	0.85	0.37977	0.525633	0.008385	3468.24	YBR158W	AMN1	CST13|ICS4	ORF	Verified	Protein required for daughter cell separation; multiple mitotic checkpoints, and chromosome stability; contains 12 degenerate leucine-rich repeat motifs; expression is induced by the Mitotic Exit Network (MEN)
YBR159W	0.9445	0.618	0.4655	0.676	0.244711	0.5355	0.006592	10374.8	YBR159W	IFA38	ketoreductase	ORF	Verified	Microsomal beta-keto-reductase; contains oleate response element (ORE) sequence in the promoter region; mutants exhibit reduced VLCFA synthesis, accumulate high levels of dihydrosphingosine, phytosphingosine and medium-chain ceramides
YBR160W	0.5995	-0.096	-0.443	0.02	0.53087	1327.17	0.963027	25511.5	YBR160W	CDC28	cyclin-dependent serine/threonine-protein kinase CDC28|SRM5|HSL5|CDK1	ORF	Verified	Cyclin-dependent kinase (CDK) catalytic subunit; master regulator of mitotic and meiotic cell cycles; alternately associates with G1, S, G2/M phase cyclins, which provide substrate specificity; regulates metabolism, basal transcription, chromosome dynamics, growth and morphogenesis; transcript induction in osmostress involves antisense RNA; human homologs CDK1, CDK2, CDK3 can complement yeast con…
YBR161W	-0.2475	-0.092	-0.1965	-0.178	0.0792691	2.50186	0.011706	3043.56	YBR161W	CSH1	mannosylinositol phosphorylceramide synthase catalytic subunit CSH1	ORF	Verified	Mannosylinositol phosphorylceramide (MIPC) synthase catalytic subunit; forms a complex with regulatory subunit Csg2p; function in sphingolipid biosynthesis is overlapping with that of Sur1p; CSH1 has a paralog, SUR1, that arose from the whole genome duplication
YBR162C	-1.372	0.387	0.6005	-0.128	1.08247	66.0686	0.834688	52394.5	YBR162C	TOS1		ORF	Verified	Covalently-bound cell wall protein of unknown function; identified as a cell cycle regulated SBF target gene; deletion mutants are highly resistant to treatment with beta-1,3-glucanase; has sequence similarity to YJL171C
YBR162W-A	0.23	-0.2705	-0.6175	-0.219	0.426061	8.88348	0.373361	31430.2	YBR162W-A	YSY6		ORF	Verified	Protein of unknown function; expression suppresses a secretory pathway mutation in E. coli; has similarity to the mammalian RAMP4 protein involved in secretion
YBR163W	0.1005	0.296	0.171	0.189	0.099008	2.7717	0.15244	15949	YBR163W	EXO5	DEM1	ORF	Verified	Mitochondrial 5'-3' exonuclease and sliding exonuclease; required for mitochondrial genome maintenance; distantly related to the RecB nuclease domain of bacterial RecBCD recombinases; may be regulated by the transcription factor Ace2
YBR164C	0.6195	0.0545	-0.1645	0.17	0.404525	13.9974	0.401773	7108.6	YBR164C	ARL1	Arf family GTPase ARL1|DLP2	ORF	Verified	Soluble GTPase with a role in regulation of membrane traffic; regulates potassium influx; role in membrane organization at trans-Golgi network; required for delivery of Atg9p to the phagophore assembly site during autophagy under high temperature stress; required with Ypt6p for starvation-induced autophagy; required for the CVT pathway under non-starvation conditions; G protein of the Ras superfa…
YBR165W	-0.2785	-0.3175	-0.42	-0.339	0.0730861	0.635969	0.011909	7420.54	YBR165W	UBS1		ORF	Verified	Ubiquitin-conjugating enzyme suppressor that regulates Cdc34p; functions as a general positive regulator of Cdc34p activity; nuclear protein that may represent a link between nucleocytoplasmic transport and ubiquitin ligase activity
YBR166C	-0.2695	-0.741	-0.7095	-0.573	0.263598	0.802848	0.016847	19035.5	YBR166C	TYR1	prephenate dehydrogenase (NADP(+))	ORF	Verified	Prephenate dehydrogenase involved in tyrosine biosynthesis; expression is dependent on phenylalanine levels
YBR167C	0.073	-0.3775	-0.8125	-0.373	0.442773	3.18246	0.135751	1162.81	YBR167C	POP7	ribonuclease P/MRP protein subunit POP7|RPP2	ORF	Verified	Subunit of RNase MRP, nuclear RNase P and telomerase; forms a soluble heterodimer with Pop6p that binds P3 domain of RNase MRP and RNase P RNAs; RNase MRP cleaves pre-rRNA, nuclear RNase P cleaves tRNA precursors to generate mature 5' ends and facilitates turnover of nuclear RNAs, while telomerase replenishes telomeric DNA
YBR168W	0.291	0.2615	-0.3535	0.066	0.363885	83.5366	0.752085	2803.19	YBR168W	PEX32		ORF	Verified	Peroxisomal integral membrane protein; involved in negative regulation of peroxisome size; partially functionally redundant with Pex31p; genetic interactions suggest action at a step downstream of steps mediated by Pex28p and Pex29p
YBR169C	-0.9655	0.2385	-0.075	-0.267	0.624618	8.76178	0.403434	2528.16	YBR169C	SSE2	adenyl-nucleotide exchange factor SSE2	ORF	Verified	Member of Hsp110 subclass of the heat shock protein 70 (HSP70) family; serves as nucleotide exchange factor to load ATP onto the SSA class of cytosolic Hsp70s; may be involved in protein folding; localized to the cytoplasm; SSE2 has a paralog, SSE1, that arose from the whole genome duplication
YBR170C	-0.316	0.063	0.074	-0.06	0.222059	61.6831	0.644999	2830.44	YBR170C	NPL4	HRD4	ORF	Verified	Substrate-recruiting cofactor of the Cdc48p-Npl4p-Ufd1p segregase; assists Cdc48p in the dislocation of misfolded, polyubiquitinated ERAD substrates that are subsequently delivered to the proteasome for degradation; also involved in the regulated destruction of resident ER membrane proteins, such as HMG-CoA reductase (Hmg1/2p) and cytoplasmic proteins (Fbp1p); role in mobilizing membrane bound tr…
YBR171W	0.0725	0.0735	0.295	0.147	0.128173	5.93145	0.215917	5382.97	YBR171W	SEC66	KAR7|Sec63 complex subunit SEC66|SEC71|HSS1	ORF	Verified	Non-essential subunit of Sec63 complex; with Sec61 complex, Kar2p/BiP and Lhs1p forms a channel competent for SRP-dependent and post-translational SRP-independent protein targeting and import into the ER; other members are Sec63p, Sec62p, and Sec72p
YBR172C	-0.8605	-0.504	-0.3125	-0.559	0.278109	0.890004	0.014606	2844.15	YBR172C	SMY2		ORF	Verified	GYF domain protein; involved in COPII vesicle formation; interacts with the Sec23p/Sec24p subcomplex; overexpression suppresses the temperature sensitivity of a myo2 mutant; similar to S. pombe Mpd2; SMY2 has a paralog, SYH1, that arose from the whole genome duplication
YBR173C	0.324	-0.342	-0.49	-0.169	0.4336	15.1816	0.451375	28260.7	YBR173C	UMP1	RNS2	ORF	Verified	Chaperone required for correct maturation of the 20S proteasome; short-lived chaperone; may inhibit premature dimerization of proteasome half-mers; degraded by proteasome upon completion of its assembly
YBR174C	0	0	0.272	0.272	0.157039	2.12261	0.86783	302.045	YBR174C	YBR174C		ORF	Dubious	Dubious open reading frame; unlikely to encode a functional protein, based on available experimental and comparative sequence data; partially overlaps the verified ORF YBR175W; null mutant is viable and sporulation defective
YBR175W	0.4685	0.0135	0.033	0.171	0.25725	8.79758	0.275563	1058.69	YBR175W	SWD3	SAF35|CPS30	ORF	Verified	Essential subunit of the COMPASS (Set1C) complex; COMPASS methylates histone H3 on lysine 4 and is required in transcriptional silencing near telomeres; WD40 beta propeller superfamily member and ortholog of mammalian WDR5
YBR176W	0.8635	0.283	0.035	0.394	0.425225	2.73921	0.147255	1200.27	YBR176W	ECM31	3-methyl-2-oxobutanoate hydroxymethyltransferase	ORF	Verified	Ketopantoate hydroxymethyltransferase; required for pantothenic acid biosynthesis, converts 2-oxoisovalerate into 2-dehydropantoate
YBR177C	-0.501	0.246	0.3795	0.041	0.474537	282.294	0.8857	44349.6	YBR177C	EHT1	medium-chain fatty acid ethyl ester synthase/esterase	ORF	Verified	Acyl-coenzymeA:ethanol O-acyltransferase; plays a minor role in medium-chain fatty acid ethyl ester biosynthesis; possesses short-chain esterase activity; localizes to lipid particles and the mitochondrial outer membrane; EHT1 has a paralog, EEB1, that arose from the whole genome duplication
YBR178W	1.1355	1.8935	0.0405	1.023	0.931593	0.890175	0.106842	305.968	YBR178W	YBR178W		ORF	Dubious	Dubious open reading frame; unlikely to encode a functional protein, based on available experimental and comparative sequence data; partially overlaps the verified gene YBR177C
YBR179C	-0.23	0.2005	0.0585	0.01	0.219365	2193.65	0.950751	16256.9	YBR179C	FZO1	mitofusin	ORF	Verified	Mitofusin; integral membrane protein involved in mitochondrial outer membrane tethering and fusion; role in mitochondrial genome maintenance; efficient tethering and degradation of Fzo1p requires an intact N-terminal GTPase domain; targeted for destruction by the ubiquitin ligase SCF-Mdm30p and the cytosolic ubiquitin-proteasome system
YBR180W	0.3055	0.5315	0.85	0.563	0.273556	0.863038	0.01353	970.103	YBR180W	DTR1		ORF	Verified	Putative dityrosine transporter of the major facilitator superfamily; member of the 12-spanner drug:H(+) antiporter DHA1 family; required for spore wall synthesis; sequence similarity to QDR1 and QDR3, and the triple mutant dtr1 qdr1 qdr3 exhibits reduced dityrosine fluorescence relative to the single mutants; expressed during sporulation
YBR181C	-0.28	-0.7695	-0.9835	-0.678	0.360629	0.784514	0.019238	22048.6	YBR181C	RPS6B	eS6|ribosomal 40S subunit protein S6B|S6e|RPS102|RPS101|LPG18	ORF	Verified	Protein component of the small (40S) ribosomal subunit; homologous to mammalian ribosomal protein S6, no bacterial homolog; phosphorylated on S233 by Ypk3p in a TORC1-dependent manner, and on S232 in a TORC1/2-dependent manner by Ypk1/2/3p; RPS6B has a paralog, RPS6A, that arose from the whole genome duplication
YBR182C	-0.199	0.6105	0.2305	0.214	0.405002	8.84361	0.319567	8118.31	YBR182C	SMP1		ORF	Verified	MADS-box transcription factor involved in osmotic stress response; SMP1 has a paralog, RLM1, that arose from the whole genome duplication
YBR183W	-0.412	0.22	0.0605	-0.044	0.328664	169.765	0.823619	52527.5	YBR183W	YPC1	phytoceramidase	ORF	Verified	Alkaline ceramidase; also has reverse (CoA-independent) ceramide synthase activity; catalyzes both breakdown and synthesis of phytoceramide; overexpression confers fumonisin B1 resistance; YPC1 has a paralog, YDC1, that arose from the whole genome duplication
YBR184W	0.283	-0.185	-0.286	-0.063	0.303586	76.4892	0.858611	374.848	YBR184W	YBR184W		ORF	Uncharacterized	Putative protein of unknown function; YBR184W is not an essential gene
YBR185C	0.7305	0.212	-0.3215	0.207	0.526018	12.2761	0.465009	3538.53	YBR185C	MBA1		ORF	Verified	Membrane-associated mitochondrial ribosome receptor; forms a complex with Mdm38p that may facilitate recruitment of mRNA-specific translational activators to ribosomes; possible role in protein export from the matrix to inner membrane
YBR186W	-3.541	-0.554	-0.354	-1.071	1.78508	1.55625	0.245118	361.894	YBR186W	PCH2		ORF	Verified	Hexameric ring ATPase that remodels chromosome axis protein Hop1p; nucleolar component of the pachytene checkpoint, which prevents chromosome segregation when recombination and chromosome synapsis are defective; also represses meiotic interhomolog recombination in rDNA; required for meiotic double-stranded break formation
YBR187W	-0.408	0.0525	0.1965	-0.053	0.315757	112.409	0.761861	11986.5	YBR187W	GDT1	putative ribosome biosynthesis protein GDT1	ORF	Verified	Calcium transporter localized to the cis- and medial-Golgi apparatus; required for protein glycosylation; GFP-fusion protein localizes to the vacuole; TMEM165, a human gene which causes Congenital Disorders of Glycosylation is orthologous and functionally complements the null allele; expression pattern and physical interactions suggest a possible role in ribosome biogenesis; expression reduced in…
YBR188C	0	0	0.3015	0.301	0.174071	1.92129	0.03331	860.5	YBR188C	NTC20		ORF	Verified	Member of the NineTeen Complex (NTC); this complex contains Prp19p and stabilizes U6 snRNA in catalytic forms of the spliceosome containing U2, U5, and U6 snRNAs
YBR189W	-0.7015	-1.158	-1.4425	-1.101	0.373812	0.308375	0.003521	45266.7	YBR189W	RPS9B	ribosomal 40S subunit protein S9B|rp21|YS11|S9B|S4|S13|SUP46|RPS13A	ORF	Verified	Protein component of the small (40S) ribosomal subunit; homologous to mammalian ribosomal protein S9 and bacterial S4; RPS9B has a paralog, RPS9A, that arose from the whole genome duplication
YBR190W	0	0	-0.2505	-0.25	0.144626	2.31402	0.29087	659.438	YBR190W	YBR190W		ORF	Dubious	Dubious open reading frame; unlikely to encode a functional protein, based on available experimental and comparative sequence data; partially overlaps the verified ribosomal protein gene RPL21A/YBR191W
YBR191W	-0.521	-1.1125	-0.892	-0.842	0.298924	0.421635	0.00852	744.938	YBR191W	RPL21A	eL21|ribosomal 60S subunit protein L21A|L21e|L21A|URP1	ORF	Verified	Ribosomal 60S subunit protein L21A; homologous to mammalian ribosomal protein L21, no bacterial homolog; RPL21A has a paralog, RPL21B, that arose from the whole genome duplication
YBR192W	0.6135	0.4095	0.4765	0.5	0.103982	0.415929	0.001681	1633.69	YBR192W	RIM2	PYT1	ORF	Verified	Mitochondrial pyrimidine nucleotide transporter; imports pyrimidine nucleoside triphosphates and exports pyrimidine nucleoside monophosphates; member of the mitochondrial carrier family
YBR193C	0.182	-0.263	-0.1765	-0.086	0.235948	31.9021	0.467733	8726.29	YBR193C	MED8		ORF	Verified	Subunit of the RNA polymerase II mediator complex; associates with core polymerase subunits to form the RNA polymerase II holoenzyme; essential for transcriptional regulation
YBR194W	0.0755	-0.0185	-0.247	-0.063	0.165859	41.7885	0.587305	2008.52	YBR194W	AIM4	SOY1	ORF	Verified	Protein proposed to be associated with the nuclear pore complex; null mutant is viable, displays elevated frequency of mitochondrial genome loss and is sensitive to freeze-thaw stress
YBR195C	0.9065	0.55	0.4875	0.648	0.226038	0.538309	0.004746	3117.62	YBR195C	MSI1	CAC3	ORF	Verified	Subunit of chromatin assembly factor I (CAF-1); chromatin assembly by CAF-1 affects multiple processes including silencing at telomeres, mating type loci, and rDNA; maintenance of kinetochore structure; deactivation of DNA damage checkpoint after DNA repair; chromatin dynamics during transcription; and repression of divergent noncoding transcription; Msi1p localizes to nucleus and cytoplasm and i…
YBR196C	-0.12	-0.006	0.0685	-0.019	0.0949373	262.984	0.86853	47619.7	YBR196C	PGI1	glucose-6-phosphate isomerase|CDC30	ORF	Verified	Glycolytic enzyme phosphoglucose isomerase; catalyzes the interconversion of glucose-6-phosphate and fructose-6-phosphate; required for cell cycle progression and completion of the gluconeogenic events of sporulation
YBR197C	-0.9035	-0.52	-0.243	-0.555	0.331678	1.07679	0.023308	2152.25	YBR197C	YBR197C		ORF	Verified	Protein of unknown function; green fluorescent protein (GFP)-fusion protein localizes to the cytoplasm and nucleus; YBR197C is not an essential gene; relative distribution to the nucleus increases upon DNA replication stress; YBR197C has a paralog, YPL077C, that arose from the whole genome duplication
YBR198C	0.332	0.363	0.6935	0.463	0.200364	0.934667	0.007409	21104.2	YBR198C	TAF5	chromatin modification protein|TafII90|TAF90	ORF	Verified	Subunit (90 kDa) of TFIID and SAGA complexes; involved in RNA polymerase II transcription initiation and in chromatin modification
YBR199W	-0.2065	-0.27	-0.526	-0.334	0.169139	1.51618	0.014734	49532.9	YBR199W	KTR4	putative mannosyltransferase	ORF	Verified	Glycosyltransferase involved in protein glycosylation; transfers GDP-mannose to methyl-alpha-mannoside in vitro; member of the KRE2/MNT1 mannosyltransferase family of type II membrane proteins with a short cytoplasmic N-terminus, a membrane-spanning region and a highly conserved catalytic lumenal domain
YBR200W	-0.112	0.558	0.766	0.404	0.458812	2.81107	0.112193	9631.24	YBR200W	BEM1	phosphatidylinositol-3-phosphate-binding protein BEM1|SRO1	ORF	Verified	Protein containing SH3-domains; involved in establishing cell polarity and morphogenesis; functions as a scaffold protein for complexes that include Cdc24p, Ste5p, Ste20p, and Rsr1p
YBR201W	0.9665	0.438	0.091	0.499	0.440874	1.77057	0.073334	1261.38	YBR201W	DER1	derlin	ORF	Verified	ER membrane protein that promotes export of misfolded polypeptides; required for ER-associated protein degradation of misfolded or unassembled proteins; initiates export of aberrant polypeptides from ER lumen by threading them into ER membrane and routing them to Hrd1p for ubiquitination; function normally requires N-terminal acetylation by NatB; N- and C- termini protrude into cytoplasm; similar…
YBR202W	-0.3865	-0.174	-0.003	-0.188	0.192124	5.43583	0.239173	4625.77	YBR202W	MCM7	mini-chromosome maintenance complex protein 7|CDC47	ORF	Verified	Component of the Mcm2-7 hexameric helicase complex; MCM2-7 primes origins of DNA replication in G1 and becomes an active ATP-dependent helicase that promotes DNA melting and elongation in S-phase; forms an Mcm4p-6p-7p subcomplex
YBR203W	-0.4565	0.845	0.4585	0.282	0.668395	8.40494	0.403093	12197.9	YBR203W	COS111		ORF	Verified	Protein required for antifungal drug ciclopirox olamine resistance; not related to the subtelomerically-encoded COS family; the authentic, non-tagged protein is detected in highly purified mitochondria in high-throughput studies
YBR204C	-0.3715	-0.1075	-0.3925	-0.291	0.15883	1.87563	0.020262	12503.3	YBR204C	LDH1	triacylglycerol lipase	ORF	Verified	Serine hydrolase; exhibits active esterase plus weak triacylglycerol lipase activities; proposed role in lipid homeostasis, regulating phospholipid and non-polar lipid levels and required for mobilization of LD-stored lipids; localizes to the lipid droplet (LD) surface; contains a classical serine containing catalytic triad (GxSxG motif)
YBR205W	0.638	0.5575	0.689	0.628	0.0662992	0.168108	0.001631	26168.4	YBR205W	KTR3	mannosyltransferase KTR3	ORF	Verified	Putative alpha-1,2-mannosyltransferase; involved in O- and N-linked protein glycosylation; member of the KRE2/MNT1 mannosyltransferase family; Svp26p mediates uptake of Ktr3p into COPII vesicles; relocalizes from nucleus to vacuole upon DNA replication stress
YBR206W	1.047	0.9445	1.0255	1.006	0.0540517	0.0534088	0.000114	13833.4	YBR206W	YBR206W		ORF	Dubious	Dubious open reading frame; unlikely to encode a functional protein, based on available experimental and comparative sequence data; partially overlaps the verified gene KTR3
YBR207W	-0.365	-0.001	-0.108	-0.158	0.18708	7.494	0.225345	1038.52	YBR207W	FTH1		ORF	Verified	Putative high affinity iron transporter; involved in transport of intravacuolar stores of iron; forms complex with Fet5p; expression is regulated by iron; proposed to play indirect role in endocytosis; protein abundance increases in response to DNA replication stress
YBR208C	0.769	0.287	1.1425	0.733	0.428895	0.798258	0.022838	51939.6	YBR208C	DUR1,2	bifunctional urea carboxylase/allophanate hydrolase|DUR80	ORF	Verified	Urea amidolyase; contains both urea carboxylase and allophanate hydrolase activities, degrades urea to CO2 and NH3; expression sensitive to nitrogen catabolite repression and induced by allophanate, an intermediate in allantoin degradation; protein abundance increases in response to DNA replication stress
YBR209W	0	0	0.518	0.518	0.299067	1.11458	0.783178	270.545	YBR209W	YBR209W		ORF	Dubious	Dubious open reading frame; unlikely to encode a functional protein, based on available experimental and comparative sequence data; YBR209W is not an essential gene
YBR210W	-0.1425	-0.0455	-0.596	-0.261	0.29386	4.31379	0.149212	1165.13	YBR210W	ERV15		ORF	Verified	Protein involved in export of proteins from the endoplasmic reticulum; ERV15 has a paralog, ERV14, that arose from the whole genome duplication
YBR211C	0.7005	0.437	-0.02	0.373	0.364555	2.62027	0.086165	5725.37	YBR211C	AME1	ARP100	ORF	Verified	Essential kinetochore protein associated with microtubules and SPBs; component of the kinetochore sub-complex COMA (Ctf19p, Okp1p, Mcm21p, Ame1p); involved in spindle checkpoint maintenance; orthologous to human centromere constitutive-associated network (CCAN) subunit CENP-U and fission yeast Mis17; relative distribution to the nucleus increases upon DNA replication stress
YBR212W	-0.6155	-0.1865	-0.337	-0.38	0.217659	1.50734	0.022744	52511.7	YBR212W	NGR1	RBP1	ORF	Verified	RNA binding protein that negatively regulates growth rate; interacts with the 3' UTR of the mitochondrial porin (POR1) mRNA and enhances its degradation; overexpression impairs mitochondrial function; interacts with Dhh1p to mediate POR1 mRNA decay; expressed in stationary phase
YBR213W	1.2125	1.019	1.8165	1.349	0.415986	0.228589	0.003019	9726.69	YBR213W	MET8	bifunctional precorrin-2 dehydrogenase/sirohydrochlorin ferrochelatase MET8	ORF	Verified	Bifunctional dehydrogenase and ferrochelatase; involved in the biosynthesis of siroheme, a prosthetic group used by sulfite reductase; required for sulfate assimilation and methionine biosynthesis
YBR214W	-0.6275	-0.153	0.2135	-0.189	0.421654	11.8041	0.379891	5869.6	YBR214W	SDS24		ORF	Verified	Protein involved in cell separation during budding; one of two S. cerevisiae homologs (Sds23p and Sds24p) of the S. pombe Sds23 protein, which is implicated in APC/cyclosome regulation; may play an indirect role in fluid-phase endocytosis; protein abundance increases in response to DNA replication stress; SDS24 has a paralog, SDS23, that arose from the whole genome duplication
YBR215W	-0.1775	0.2695	0.323	0.138	0.274825	14.431	0.334363	2112.66	YBR215W	HPC2		ORF	Verified	Subunit of the HIR complex; HIR is a nucleosome assembly complex involved in regulation of histone gene transcription; mutants display synthetic defects with subunits of FACT, a complex that allows passage of RNA Pol II through nucleosomes
YBR216C	-0.7035	-0.0925	-0.4935	-0.43	0.310436	1.67894	0.034027	6482.4	YBR216C	YBP1		ORF	Verified	Protein involved in cellular response to oxidative stress; required for oxidation of specific cysteine residues of transcription factor Yap1p, resulting in nuclear localization of Yap1p in response to stress; YBP1 has a paralog, YBP2, that arose from the whole genome duplication
YBR217W	0.2935	-0.0135	-0.3105	-0.01	0.302014	3020.14	0.970024	1132.88	YBR217W	ATG12	APG12	ORF	Verified	Ubiquitin-like modifier involved in autophagy and the Cvt pathway; conserved; conjugated to Atg5p to form a complex involved in Atg8p lipidation; Atg5p-Atg12p conjugate enhances E2 activity of Atg3p by rearranging its catalytic site, also forms a complex with Atg16p; the Atg5-Atg12/Atg16 complex binds to membranes and is essential for autophagosome formation
YBR218C	-0.234	-0.151	0.342	-0.014	0.311372	1588.63	0.959686	55438.2	YBR218C	PYC2	pyruvate carboxylase 2	ORF	Verified	Pyruvate carboxylase isoform; cytoplasmic enzyme that converts pyruvate to oxaloacetate; differentially regulated than isoform Pyc1p; mutations in the human homolog are associated with lactic acidosis; PYC2 has a paralog, PYC1, that arose from the whole genome duplication
YBR219C	0	0	-0.16	-0.16	0.092376	3.60844	0.827453	540.462	YBR219C	YBR219C		ORF	Uncharacterized	Putative protein of unknown function; YBR219C is not an essential gene
YBR220C	-0.6865	-0.596	-0.727	-0.67	0.0670715	0.149413	0.001114	10439.9	YBR220C	YBR220C		ORF	Uncharacterized	Putative protein of unknown function; YBR220C is not an essential gene
YBR221C	-0.1715	-0.0615	-0.0545	-0.096	0.0656227	7.12051	0.043039	34014.7	YBR221C	PDB1	pyruvate dehydrogenase (acetyl-transferring) subunit E1 beta	ORF	Verified	E1 beta subunit of the pyruvate dehydrogenase (PDH) complex; PDH is an evolutionarily conserved multi-protein complex found in mitochondria
YBR222C	-0.794	-0.9075	-0.902	-0.868	0.0640007	0.0849464	0.000798	40212.1	YBR222C	PCS60	FAT2	ORF	Verified	Oxalyl-CoA synthetase; capable of catalyzing conversion of oxalate to oxalyl-CoA; catalyzes first step in pathway of oxalate degradation that functions to protect yeast from inhibitory effects of oxalate; peroxisomal protein that binds mRNA; localizes to both peroxisomal peripheral membrane and matrix, expression is highly inducible by oleic acid; similar to E. coli long chain acyl-CoA synthetase
YBR223C	-1.1255	0.376	0.5525	-0.066	0.922075	211.679	0.907563	12636.4	YBR223C	TDP1	tyrosyl-DNA phosphodiesterase 1	ORF	Verified	Tyrosyl-DNA phosphodiesterase I; hydrolyzes 3' and 5'-phosphotyrosyl bonds; involved in the repair of DNA lesions created by topo I and topo II; mutations in the human homolog, TDP1, result in the a neurodegenerative disease, spinocerebellar ataxia with axonal neuropathy (SCAN1); yeast cells and human rhabdomyosarcoma lines that overexpress TDP1 both exhibit elevated dosage chromosomal instabilit…
YBR224W	0	0	-0.939	-0.939	0.542132	0.614857	1	519.167	YBR224W	YBR224W		ORF	Dubious	Dubious open reading frame; unlikely to encode a functional protein, based on available experimental and comparative sequence data; partially overlaps the verified gene TDP1
YBR225W	-2.351	-0.5695	-0.349	-1.09	1.09775	0.923957	0.095885	1298.31	YBR225W	YBR225W		ORF	Uncharacterized	Putative protein of unknown function; non-essential gene identified in a screen for mutants affected in mannosylphophorylation of cell wall components
YBR226C	-0.798	0	2.611	0.907	1.78304	2.16744	0.77386	250.955	YBR226C	YBR226C		ORF	Dubious	Dubious open reading frame; unlikely to encode a functional protein, based on available experimental and comparative sequence data; partially overlaps the uncharacterized ORF YBR225W
YBR227C	0.704	0.34	0.6505	0.565	0.19654	0.615679	0.005431	20926.7	YBR227C	MCX1		ORF	Verified	Non-proteolytic ATPase of the AAA family; stimulates incorporation of the pyridoxal phosphate cofactor into Hem1p (5-aminolevulinic acid synthase); localized to the mitochondrial matrix; ortholog of vertebrate CLPX, which promotes erythropoiesis
YBR228W	-1.571	-0.079	-0.1005	-0.584	0.855268	2.5077	0.193161	1128.03	YBR228W	SLX1	endonuclease	ORF	Verified	Endonuclease involved in DNA recombination and repair; subunit of a complex, with Slx4p, that hydrolyzes 5' branches from duplex DNA in response to stalled or converging replication forks; function overlaps with that of Sgs1p-Top3p
YBR229C	-0.3745	-0.2125	-0.2535	-0.28	0.0842279	1.07434	0.017263	6473.65	YBR229C	ROT2	glucan 1,3-alpha-glucosidase ROT2|GLS2	ORF	Verified	Glucosidase II catalytic subunit; required to trim the final glucose in N-linked glycans; required for normal cell wall synthesis; mutations in rot2 suppress tor2 mutations, and are synthetically lethal with rot1 mutations
YBR230C	-0.067	-0.9065	-1.149	-0.708	0.567787	1.13271	0.099766	43728.8	YBR230C	OM14		ORF	Verified	Mitochondrial outer membrane receptor for cytosolic ribosomes; integral protein of the outer membrane that interacts with the nascent chain-associated complex (NAC) bound to ribosomes, contributing to co-translational mitochondrial import; interacts with porin (Por1p) and Om45p; abundance is decreased in cells grown in glucose relative to other carbon sources
YBR231C	0.0385	0.22	0.7215	0.327	0.353773	3.30849	0.103496	35351.5	YBR231C	SWC5	AOR1	ORF	Verified	Component of the SWR1 complex; complex exchanges histone variant H2AZ (Htz1p) for chromatin-bound histone H2A; protein abundance increases in response to DNA replication stress; relocalizes to the cytosol in response to hypoxia
YBR232C	0	0	2.487	2.487	1.43587	0.232147	1	483.188	YBR232C	YBR232C		ORF	Dubious	Dubious open reading frame; unlikely to encode a functional protein, based on available experimental and comparative sequence data
YBR233W	0.95	0.359	0.7905	0.7	0.305754	0.623988	0.007863	1812.18	YBR233W	PBP2	HEK1	ORF	Verified	RNA binding protein; has similarity to mammalian heterogeneous nuclear RNP K protein, involved in the regulation of telomere position effect and telomere length; relative distribution to the nucleus increases upon DNA replication stress
YBR233W-A	0.207	-0.1625	-0.2005	-0.052	0.225104	83.2485	0.852324	312.152	YBR233W-A	DAD3		ORF	Verified	Essential subunit of the Dam1 complex (aka DASH complex); complex couples kinetochores to the force produced by MT depolymerization thereby aiding in chromosome segregation; is transferred to the kinetochore prior to mitosis
YBR234C	0.7525	0.2195	0.6145	0.529	0.276634	0.98854	0.06302	52416.6	YBR234C	ARC40		ORF	Verified	Subunit of the ARP2/3 complex; ARP2/3 is required for the motility and integrity of cortical actin patches
YBR235W	0.4975	0.6345	0.8275	0.653	0.16579	0.388805	0.002392	9718.12	YBR235W	VHC1		ORF	Verified	Vacuolar membrane cation-chloride cotransporter (CCC); likely mediates K+ and Cl- cotransport into the vacuole; has a role in potassium homeostasis and salt tolerance; localizes to sites of contact between the vacuole and mitochondria (vCLAMPs); similar to mammalian electroneutral Na(+)-(K+)-C1- cotransporter family
YBR236C	0.4105	0.1835	0.172	0.255	0.134501	2.06845	0.079082	11331.9	YBR236C	ABD1	mRNA (guanine-N7)-methyltransferase	ORF	Verified	Methyltransferase; catalyzes the transfer of a methyl group from S-adenosylmethionine to the GpppN terminus of capped mRNA; nuclear protein that relocalizes to the cytosol in response to hypoxia
YBR237W	-0.5115	-0.2575	-0.288	-0.352	0.138683	1.11928	0.005581	7372.03	YBR237W	PRP5	DEAD-box RNA helicase PRP5|RNA5	ORF	Verified	RNA helicase in the DEAD-box family; necessary for prespliceosome formation, bridges U1 and U2 snRNPs and enables stable U2 snRNP association with intron RNA
YBR238C	-0.978	-0.884	-0.1825	-0.682	0.434695	0.934579	0.027437	1170.27	YBR238C	YBR238C		ORF	Verified	Mitochondrial membrane protein; not required for respiratory growth but causes a synthetic respiratory defect in combination with rmd9 mutations; transcriptionally up-regulated by TOR; deletion increases life span; YBR238C has a paralog, RMD9, that arose from the whole genome duplication
YBR239C	-1.916	-1.044	-1.036	-1.332	0.505775	0.285068	0.00517	2444.68	YBR239C	ERT1		ORF	Verified	Transcriptional regulator; involved in regulation of gluconeogenesis and fermentable carbon utilization; GFP-fusion protein localizes to cytoplasm, nucleus; null mutation affects periodicity of transcriptional and metabolic oscillation; plays role in restricting Ty1 transposition; member of the zinc cluster family of proteins, similar to Rds2p
YBR240C	0.281	0.355	0.28	0.305	0.0430155	0.462408	0.001403	3170.66	YBR240C	THI2	phoF|PHO6	ORF	Verified	Transcriptional activator of thiamine biosynthetic genes; interacts with regulatory factor Thi3p to control expression of thiamine biosynthetic genes with respect to thiamine availability; acts together with Pdc2p to respond to thiaminediphosphate demand, possibly as related to carbon source availability; zinc finger protein of the Zn(II)2Cys6 type
YBR241C	-0.68	0.05	0.3815	-0.083	0.543074	78.832	0.78267	55788.7	YBR241C	YBR241C		ORF	Uncharacterized	Putative transporter, member of the sugar porter family; green fluorescent protein (GFP)-fusion protein localizes to the vacuolar membrane; YBR241C is not an essential gene; YBR241C has a paralog, VPS73, that arose from the whole genome duplication
YBR242W	0.2625	-0.527	-0.8095	-0.358	0.555623	4.33525	0.217024	11748.2	YBR242W	YBR242W		ORF	Uncharacterized	Putative protein of unknown function; green fluorescent protein (GFP)-fusion protein localizes to the cytoplasm and nucleus; YBR242W is not an essential gene; YBR242W has a paralog, YGL101W, that arose from the whole genome duplication
YBR243C	0.299	0.8345	0.678	0.604	0.275346	0.754754	0.009859	5241.97	YBR243C	ALG7	UDP-N-acetylglucosamine--dolichyl-phosphate N-acetylglucosaminephosphotransferase|TUR1	ORF	Verified	UDP-N-acetyl-glucosamine-1-P transferase; transfers Glc-Nac-P from UDP-GlcNac to Dol-P in the ER in the first step of the dolichol pathway of protein asparagine-linked glycosylation; inhibited by tunicamycin; human homolog DPAGT1 can complement yeast ALG7 mutant
YBR244W	0.093	-0.2935	-0.455	-0.218	0.281593	5.92528	0.172883	778.721	YBR244W	GPX2	glutathione peroxidase GPX2|AMI1	ORF	Verified	Phospholipid hydroperoxide glutathione peroxidase; protects cells from phospholipid hydroperoxides and nonphospholipid peroxides during oxidative stress; induced by glucose starvation; protein abundance increases in response to DNA replication stress
YBR245C	0.172	0.2745	0.462	0.303	0.147061	1.60182	0.021196	13797.8	YBR245C	ISW1	chromatin-remodeling ATPase ISW1|SGN2	ORF	Verified	ATPase subunit of imitation-switch (ISWI) class chromatin remodelers; with Ioc3p forms Isw1a complex involved in repression of transcription initiation; with Ioc2p and Ioc4p forms Isw1b complex involved in regulation of transcription elongation; Isw1b recruited to ORFs by H3K36 methylation and acts with Chd1p to prevent trans-histone exchange over coding regions; Isw1p import into nucleus depends…
YBR246W	0.8205	0.4525	0.329	0.534	0.255685	0.896649	0.010208	6485.4	YBR246W	RRT2	DPH7|diphthamide synthase|ERE1	ORF	Verified	Methylesterase performing penultimate step of diphthamide biosynthesis; hydrolyzes methylated diphthine to produce diphthine and allows Dph6-catalyzed amidation reaction to occur; deletion leads to resistance to sordarin and accumulation of methylatediphthine; WD40 domain-containing protein; involved in endosomal recycling; forms complex with Rtt10p that functions in retromer-mediated pathway for…
YBR247C	0.3115	-0.066	0.424	0.223	0.256665	5.16128	0.1215	6271.68	YBR247C	ENP1	snoRNA-binding rRNA-processing protein ENP1|MEG1	ORF	Verified	Protein associated with U3 and U14 snoRNAs; required for pre-rRNA processing and 40S ribosomal subunit synthesis; localized in the nucleus and concentrated in the nucleolus; human BYSL functionally complements the heat sensitivity of an enp1 ts mutant
YBR248C	1.5	0.635	1.3075	1.147	0.454154	0.345205	0.006004	21417.1	YBR248C	HIS7	imidazoleglycerol-phosphate synthase	ORF	Verified	Imidazole glycerol phosphate synthase; glutamine amidotransferase:cyclase that catalyzes the fifth step of histidine biosynthesis and also produces 5-aminoimidazole-4-carboxamide ribotide (AICAR), a purine precursor
YBR249C	-0.3265	-1.029	-0.516	-0.624	0.363452	0.933422	0.031786	50494.7	YBR249C	ARO4	3-deoxy-7-phosphoheptulonate synthase ARO4	ORF	Verified	3-deoxy-D-arabino-heptulosonate-7-phosphate (DAHP) synthase; catalyzes the first step in aromatic amino acid biosynthesis and is feedback-inhibited by tyrosine or high concentrations of phenylalanine or tryptophan; relative distribution to the nucleus increases upon DNA replication stress
YBR250W	-0.1685	0.022	0.1785	0.011	0.173777	1436.18	0.971053	490.515	YBR250W	SPO23		ORF	Verified	Protein of unknown function; associates with meiosis-specific protein Spo1p
YBR251W	0.9345	0.5045	-0.044	0.465	0.490444	2.26821	0.099936	10190.2	YBR251W	MRPS5	mitochondrial 37S ribosomal protein MRPS5	ORF	Verified	Mitochondrial ribosomal protein of the small subunit
YBR252W	1.4595	0.461	0.1825	0.701	0.671478	1.36646	0.080839	1230.63	YBR252W	DUT1	bifunctional dITP/dUTP diphosphatase	ORF	Verified	Deoxyuridine triphosphate diphosphatase (dUTPase); catalyzes hydrolysis of dUTP to dUMP and PPi, thereby preventing incorporation of uracil into DNA during replication; critical for the maintenance of genetic stability; also has diphosphatase activity on deoxyinosine triphosphate; human homolog DUT allows growth of yeast haploid dut1 null mutant after sporulation of heterozygous diploid
YBR253W	0.4665	0.5795	0.064	0.37	0.27096	1.97925	0.041436	9118.94	YBR253W	SRB6	MED22	ORF	Verified	Subunit of the RNA polymerase II mediator complex; associates with core polymerase subunits to form the RNA polymerase II holoenzyme; essential for transcriptional regulation
YBR254C	-0.844	0.119	0.2265	-0.166	0.589477	21.3919	0.59844	1403.29	YBR254C	TRS20	TRAPP subunit TRS20	ORF	Verified	Core component of transport protein particle (TRAPP) complexes I-III; TRAPPs are multimeric guanine nucleotide-exchange factors for GTPase Ypt1p, regulating ER-Golgi traffic (TRAPPI), intra-Golgi traffic (TRAPPII), endosome-Golgi traffic (TRAPPII and III) and autophagy (TRAPPIII); mutation leads to defects in endocytic recycling, block in sporulation/meiosis; mutations in human homolog TRAPPC2 ca…
YBR255C-A	0	-0.927	0.109	-0.409	0.569284	3.40316	0.672375	368.722	YBR255C-A	RCF3		ORF	Uncharacterized	Putative protein of unknown function; may interact with respiratory chain complexes III (ubiquinol-cytochrome c reductase) or IV (cytochrome c oxidase); identified by sequence comparison with hemiascomycetous yeast species
YBR255W	0.1245	0.5425	0.6695	0.445	0.285154	1.43999	0.039796	38828.6	YBR255W	MTC4		ORF	Verified	Protein of unknown function; required for normal growth rate at 15 degrees C; green fluorescent protein (GFP)-fusion protein localizes to the cytoplasm in a punctate pattern; mtc4 is synthetically sick with cdc13-1
YBR256C	0.3425	-0.0355	-0.102	0.068	0.239752	51.8495	0.664765	55184.9	YBR256C	RIB5	riboflavin synthase	ORF	Verified	Riboflavin synthase; catalyzes the last step of the riboflavin biosynthesis pathway
YBR257W	0.652	-0.042	0.089	0.233	0.368729	6.79196	0.28645	7132.38	YBR257W	POP4	RNase P/RNase MRP complex subunit	ORF	Verified	Subunit of both RNase MRP and nuclear RNase P; RNase MRP cleaves pre-rRNA, while nuclear RNase P cleaves tRNA precursors to generate mature 5' ends and facilitates turnover of nuclear RNAs; binds to the RPR1 RNA subunit in RNase P
YBR258C	0.793	0.279	0.215	0.429	0.316853	1.72165	0.036645	2557.79	YBR258C	SHG1	CPS15	ORF	Verified	Subunit of the COMPASS (Set1C) complex; COMPASS methylates histone H3 on lysine 4 and is required in transcriptional silencing near telomeres
YBR259W	-1.1425	-0.379	-0.056	-0.526	0.557934	2.01656	0.110517	618.044	YBR259W	YBR259W		ORF	Verified	Protein of unknown function; YBR259W is not an essential gene; forms cytoplasmic foci upon DNA replication stress
YBR260C	-0.6305	0.043	0.135	-0.151	0.417943	18.33	0.492067	9919.59	YBR260C	RGD1		ORF	Verified	GTPase-activating protein (RhoGAP) for Rho3p and Rho4p; possibly involved in control of actin cytoskeleton organization
YBR261C	0.785	-0.057	0.418	0.382	0.422153	2.89296	0.109349	6869.62	YBR261C	TAE1	N-terminal protein methyltransferase|NTM1	ORF	Verified	AdoMet-dependent proline methyltransferase; catalyzes the dimethylation of ribosomal proteins Rpl12 and Rps25 at N-terminal proline residues; has a role in protein synthesis; fusion protein localizes to the cytoplasm
YBR262C	0.907	0.513	0.377	0.599	0.275267	0.767186	0.009902	33271.1	YBR262C	MIC12	AIM5|MCS12|FMP51	ORF	Verified	Component of the MICOS complex; MICOS (formerly MINOS or MitOS) is a mitochondrial inner membrane complex that extends into the intermembrane space and has a role in the maintenance of crista junctions, inner membrane architecture, and formation of contact sites to the outer membrane; forms a subcomplex with Mic10p and Mic27p whose assembly and stability requires cardiolipin
YBR263W	-0.788	-0.246	-0.297	-0.444	0.29929	1.51819	0.030192	15428.6	YBR263W	SHM1	glycine hydroxymethyltransferase SHM1|TMP3|SHMT1	ORF	Verified	Mitochondrial serine hydroxymethyltransferase; converts serine to glycine plus 5,10 methylenetetrahydrofolate; involved in generating precursors for purine, pyrimidine, amino acid, and lipid biosynthesis; reverse reaction generates serine
YBR264C	1.147	0.774	0.7785	0.9	0.214064	0.264277	0.001631	1261.81	YBR264C	YPT10	Rab family GTPase YPT10	ORF	Verified	Rab family GTP-binding protein; contains the PEST signal sequence specific for proteolytic enzymes; may be involved in vesicular transport; overexpression leads to accumulation of Golgi-like cisternae with budding vesicles
YBR265W	0.211	0.4285	0.443	0.361	0.129962	0.997244	0.01187	29640.3	YBR265W	TSC10	3-dehydrosphinganine reductase	ORF	Verified	3-ketosphinganine reductase; catalyzes the second step in phytosphingosine synthesis; essential for growth in the absence of exogenous dihydrosphingosine or phytosphingosine; localized to lipid droplets; member of short chain dehydrogenase/reductase protein family
YBR266C	1.473	2.085	0.7815	1.28	0.652154	0.398043	0.081759	325.667	YBR266C	SLM6		ORF	Dubious	Protein with a potential role in actin cytoskeleton organization; gene exhibits synthetic genetic interaction with MSS4 encoding phosphatidylinositol 4-phosphate kinase
YBR267W	0.5435	0.021	0.429	0.331	0.274645	2.50678	0.050972	20365.9	YBR267W	REI1		ORF	Verified	Cytoplasmic pre-60S factor; required for the correct recycling of shuttling factors Alb1, Arx1 and Tif6 at the end of the ribosomal large subunit biogenesis; involved in bud growth in the mitotic signaling network
YBR268W	0.5665	0.278	-0.2705	0.191	0.425177	11.6548	0.42489	12284.6	YBR268W	MRPL37	mitochondrial 54S ribosomal protein YmL37|YmL37	ORF	Verified	Mitochondrial ribosomal protein of the large subunit
YBR269C	0.166	0.209	0.456	0.277	0.156502	2.03968	0.050154	49212.3	YBR269C	SDH8	FMP21	ORF	Verified	Protein required for assembly of succinate dehydrogenase; interacts with flavinylated Sdh1p and may function as a chaperone for free Sdh1p, protecting its FAD cofactor from redox reactions before assembly of the complex; soluble protein of the mitochondrial matrix; respiratory defect of null mutant is functionally complemented by Drosophila and human orthologs
YBR270C	-0.31	0.05	-0.186	-0.149	0.182881	8.2375	0.179146	6212.66	YBR270C	BIT2		ORF	Verified	Subunit of TORC2 membrane-associated complex; involved in regulation of actin cytoskeletal dynamics during polarized growth and cell wall integrity; interacts with Slm1p and Slm2p, homologous PH domain-containing TORC2 substrates; BIT2 has a paralog, BIT61, that arose from the whole genome duplication
YBR271W	0.8535	0.4615	0.824	0.713	0.218304	0.429421	0.023475	1376.56	YBR271W	EFM2	S-adenosylmethionine-dependent methyltransferase	ORF	Verified	S-adenosylmethionine-dependent methyltransferase; seven-beta-strand lysine methyltransferase which dimethylates translation elongation factor EF2 (Eft1p and Eft2p) at lysine 613 and methylates EF3 (Yef3p) at lysine 187; green fluorescent protein (GFP)-fusion protein localizes to the cytoplasm; involved in regulation of translational termination; predicted involvement in ribosome biogenesis
YBR272C	-0.337	0.3855	0.1605	0.069	0.369716	77.655	0.724343	5372.75	YBR272C	HSM3		ORF	Verified	Evolutionarily conserved 19S regulatory particle assembly-chaperone; involved in the assembly of the base subcomplex of the 19S proteasomal regulatory particle (RP); involved in DNA mismatch repair during slow growth; weak similarity to Msh1p; structural study suggests Hsm3p is a scaffold protein for Rpt1p-Rpt2p complex formation; ortholog of human 19S subunit S5b
YBR273C	-0.7835	-0.2265	-0.252	-0.421	0.314481	1.77432	0.040501	54683.8	YBR273C	UBX7	CUI3	ORF	Verified	UBX (ubiquitin regulatory X) domain-containing protein; interacts with Cdc48p; UBX7 has a paralog, UBX6, that arose from the whole genome duplication
YBR274W	-0.388	-0.11	-0.29	-0.263	0.141001	2.0385	0.055052	2471.15	YBR274W	CHK1	serine/threonine protein kinase CHK1	ORF	Verified	Serine/threonine kinase and DNA damage checkpoint effector; mediates cell cycle arrest via phosphorylation of Pds1p; phosphorylated by checkpoint signal transducer Mec1p; homolog of S. pombe and mammalian Chk1 checkpoint kinase
YBR275C	-0.7695	0.0325	0.032	-0.235	0.462891	8.3819	0.32232	7171.94	YBR275C	RIF1	DNA-binding protein RIF1	ORF	Verified	Protein that binds to the Rap1p C-terminus; acts synergistically with Rif2p to help control telomere length and establish telomeric silencing; involved in control of DNA replication; contributes to resection of DNA double strand breaks (DSBs); deletion results in telomere elongation
YBR276C	0.268	0.5145	0.584	0.456	0.166056	0.798594	0.009871	2848.74	YBR276C	PPS1	tyrosine/serine/threonine protein phosphatase PPS1	ORF	Verified	Protein phosphatase; has specificity for serine, threonine, and tyrosine residues; has a role in the DNA synthesis phase of the cell cycle
YBR277C	1.066	0.0815	0.3325	0.379	0.511577	3.56149	0.34855	291.222	YBR277C	YBR277C		ORF	Dubious	Dubious open reading frame; unlikely to encode a functional protein, based on available experimental and comparative sequence data; partially overlaps the verified gene YBR278W
YBR278W	0.359	0.603	0.9445	0.635	0.2941	0.729369	0.329339	300.762	YBR278W	DPB3	DNA polymerase epsilon noncatalytic subunit	ORF	Verified	Third-largest subunit of DNA polymerase II (DNA polymerase epsilon); required to maintain fidelity of chromosomal replication and also for inheritance of telomeric silencing; stabilizes the interaction of Pol epsilon with primer-template DNA, positively affecting the processivity of the polymerase and exonuclease activities of Pol epsilon; mRNA abundance peaks at the G1/S boundary of the cell cyc…
YBR279W	0.572	0.156	0.44	0.389	0.212578	1.40481	0.025615	28553.1	YBR279W	PAF1		ORF	Verified	Component of the Paf1p complex involved in transcription elongation; binds to and modulates the activity of RNA polymerases I and II; required for expression of a subset of genes, including cell cycle-regulated genes; involved in SER3 repression by helping to maintain SRG1 transcription-dependent nucleosome occupancy; homolog of human PD2/hPAF1
YBR280C	-0.968	-0.2405	-0.4665	-0.558	0.372343	1.19584	0.026536	29960.8	YBR280C	SAF1	SCF ubiquitin ligase complex subunit SAF1	ORF	Verified	F-Box protein involved in proteasome-dependent degradation of Aah1p; involved in proteasome-dependent degradation of Aah1p during entry of cells into quiescence; interacts with Skp1
YBR281C	0.3185	-0.2395	-0.1605	-0.027	0.301951	414.199	0.878236	5240.22	YBR281C	DUG2	glutamine amidotransferase subunit DUG2	ORF	Verified	Component of glutamine amidotransferase (GATase II); forms a complex with Dug3p to degrade glutathione (GSH) and other peptides containing a gamma-glu-X bond in an alternative pathway to GSH degradation by gamma-glutamyl transpeptidase (Ecm38p)
YBR282W	1.115	0.807	0.569	0.831	0.273747	0.396412	0.003403	7257.97	YBR282W	MRPL27	mitochondrial 54S ribosomal protein YmL27|YmL27	ORF	Verified	Mitochondrial ribosomal protein of the large subunit; homolog of human Bcl-2 interacting protein BMRP
YBR283C	-0.121	-0.176	-0.4765	-0.258	0.191357	2.87479	0.042035	25026	YBR283C	SSH1		ORF	Verified	Subunit of the Ssh1 translocon complex; Sec61p homolog involved in co-translational pathway of protein translocation; not essential
YBR284W	-1.1885	0.1435	-0.4005	-0.482	0.669714	2.88267	0.178145	1471.35	YBR284W	YBR284W	metallo-dependent hydrolase superfamily protein	ORF	Uncharacterized	Putative metallo-dependent hydrolase superfamily protein; similar to AMP deaminases but lacks key catalytic residues and does not rescue purine nucleotide metabolic defect of quadruple aah1 ade8 amd1 his1 mutant; null mutant exhibits longer telomeres, altered Ty mobility, decreased resistance to rapamycin and wortmannin; induced in response to hydrostatic pressure; not an essential gene; YBR284W …
YBR285W	1.16	0.2715	-0.1	0.444	0.647437	3.28421	0.19959	8727.6	YBR285W	YBR285W		ORF	Uncharacterized	Putative protein of unknown function; YBR285W is not an essential gene
YBR286W	0.0915	-0.0225	0.192	0.087	0.107321	14.179	0.48087	41235.6	YBR286W	APE3	APY1	ORF	Verified	Vacuolar aminopeptidase Y; processed to mature form by Prb1p
YBR287W	-2.535	-0.6875	-0.8565	-1.36	1.02137	0.552211	0.037806	45508.3	YBR287W	YBR287W	ZSP1	ORF	Uncharacterized	Protein of unknown function; green fluorescent protein (GFP)-fusion protein localizes to the ER; YBR287W is not an essential gene
YBR288C	0.551	0.2855	0.321	0.386	0.144136	0.967379	0.006985	5195.87	YBR288C	APM3	YKS6	ORF	Verified	Mu3-like subunit of the clathrin associated protein complex (AP-3); functions in transport of alkaline phosphatase to the vacuole via the alternate pathway
YBR289W	0.5805	0.016	0.2735	0.29	0.282611	3.36042	0.14154	10786.6	YBR289W	SNF5	TYE4|SWI10|HAF4	ORF	Verified	Subunit of the SWI/SNF chromatin remodeling complex; involved in transcriptional regulation; functions interdependently in transcriptional activation with Snf2p and Snf6p; relocates to the cytosol under hypoxic conditions
YBR290W	0.2185	0.2515	-0.106	0.121	0.197567	13.4941	0.292897	1044.65	YBR290W	BSD2		ORF	Verified	Heavy metal ion homeostasis protein; facilitates trafficking of Smf1p and Smf2p metal transporters to vacuole where they are degraded; acts as an adaptor protein with Rsp5p in the regulated endocytosis of Smf1p and is itself ubiquitylated by Rsp5p; controls metal ion transport, prevents metal hyperaccumulation, functions in copper detoxification
YBR291C	0.735	-0.3095	-0.193	0.077	0.572383	96.5396	0.809744	4950.41	YBR291C	CTP1		ORF	Verified	Mitochondrial inner membrane citrate transporter; member of the mitochondrial carrier family
YBR292C	0.7915	-0.178	0.4645	0.359	0.493232	3.82703	0.422063	325.561	YBR292C	YBR292C		ORF	Dubious	Dubious open reading frame; unlikely to encode a functional protein, based on available experimental and comparative sequence data; YBR292C is not an essential gene
YBR293W	-1.3525	-0.9595	-0.678	-0.997	0.338783	0.340824	0.003554	2172.57	YBR293W	VBA2		ORF	Verified	Permease of basic amino acids in the vacuolar membrane
YBR294W	0.0795	0.4895	0.41	0.326	0.217428	2.04588	0.033504	14615.4	YBR294W	SUL1	sulfate permease|SFP2	ORF	Verified	High affinity sulfate permease of the SulP anion transporter family; sulfate uptake is mediated by specific sulfate transporters Sul1p and Sul2p, which control the concentration of endogenous activated sulfate intermediates
YBR295W	-0.846	0.051	-0.1575	-0.318	0.469417	4.64199	0.220303	20785.1	YBR295W	PCA1	cation-transporting P-type ATPase PCA1|PAY2|CAD2	ORF	Verified	Cadmium transporting P-type ATPase; may also have a role in copper and iron homeostasis; stabilized by Cd binding, which prevents ubiquitination; S288C and other lab strains contain a G970R mutation which eliminates Cd transport function
YBR296C	-1.9435	-1.34	-1.274	-1.519	0.368962	0.159907	0.001631	2857.01	YBR296C	PHO89	ITN1	ORF	Verified	Plasma membrane Na+/Pi cotransporter; active in early growth phase; similar to phosphate transporters of Neurospora crassa; transcription regulated by inorganic phosphate concentrations and Pho4p; mutations in related human transporter genes hPit1 and hPit2 are associated with hyperphosphatemia-induced calcification of vascular tissue and familial idiopathic basal ganglia calcification
YBR297W	-0.633	-0.2835	-0.4525	-0.456	0.174782	0.840554	0.010998	5428.31	YBR297W	MAL33	transcription factor MAL33|MALR|MAL3R	ORF	Verified	MAL-activator protein; part of complex locus MAL3; nonfunctional in genomic reference strain S288C
YBR298C	-1.608	-0.083	0.212	-0.493	0.976819	4.01902	0.3223	37157.6	YBR298C	MAL31	maltose permease|MALT|MAL3T	ORF	Verified	Maltose permease; high-affinity maltose transporter (alpha-glucoside transporter); encoded in the MAL3 complex locus; member of the 12 transmembrane domain superfamily of sugar transporters; functional in genomic reference strain S288C
YBR299W	-0.414	0.29	0.4815	0.119	0.471559	33.2999	0.637799	2800.6	YBR299W	MAL32	alpha-glucosidase MAL32|MALS|MAL3S	ORF	Verified	Maltase (alpha-D-glucosidase); inducible protein involved in maltose catabolism; encoded in the MAL3 complex locus; functional in genomic reference strain S288C; hydrolyzes the disaccharides maltose, turanose, maltotriose, and sucrose
YBR300C	0.957	0	0.2545	0.489	0.495669	2.07288	0.304592	333.568	YBR300C	YBR300C		ORF	Dubious	Dubious open reading frame; unlikely to encode a functional protein, based on available experimental and comparative sequence data; partially overlaps the verified gene YBR301W; YBR300C is not an essential gene
YBR301W	-0.241	-0.1355	-0.3865	-0.254	0.12603	1.95347	0.022319	22182.8	YBR301W	PAU24	seripauperin PAU24|DAN3	ORF	Verified	Cell wall mannoprotein; has similarity to Tir1p, Tir2p, Tir3p, and Tir4p; member of the seripauperin multigene family encoded mainly in subtelomeric regions; expressed under anaerobic conditions, completely repressed during aerobic growth
YBR302C	-0.5085	-0.3485	-0.33	-0.395	0.0981534	0.629087	0.08767	44253.6	YBR302C	COS2		ORF	Verified	Endosomal protein involved in turnover of plasma membrane proteins; member of the DUP380 subfamily of conserved, often subtelomeric COS genes; required for the multivesicular vesicle body sorting pathway that internalizes plasma membrane proteins for degradation; Cos proteins provide ubiquitin in trans for nonubiquitinated cargo proteins
YCL001W	0.4645	0.0845	-0.3545	0.065	0.409854	97.0069	0.778905	15235.6	YCL001W	RER1	protein retrieval receptor	ORF	Verified	Protein involved in retention of membrane proteins; including Sec12p, in the ER; localized to Golgi; functions as a retrieval receptor in returning membrane proteins to the ER
YCL001W-A	0	0.203	0.2305	0.217	0.125894	2.67353	0.70645	447.333	YCL001W-A	YCL001W-A		ORF	Uncharacterized	Putative protein of unknown function; YCL001W-A gene has similarity to DOM34 and is present in a region duplicated between chromosomes XIV and III
YCL001W-B	-2.286	-0.596	0.0665	-0.687	1.21307	2.57024	0.403896	356.417	YCL001W-B	YCL001W-B		ORF	Uncharacterized	Putative protein of unknown function; present in a region duplicated between chromosomes XIV and III; YCL001W-B has a paralog, DOM34, that arose from the whole genome duplication
YCL002C	-0.16	0.268	-0.139	-0.01	0.241272	2412.72	0.952524	2823.75	YCL002C	YCL002C		ORF	Uncharacterized	Putative protein of unknown function; YCL002C is not an essential gene
YCL004W	-0.073	0.368	0.101	0.132	0.222128	12.7484	0.251661	3346.26	YCL004W	PGS1	CDP-diacylglycerol--glycerol-3-phosphate 3-phosphatidyltransferase|YCL003W|PEL1	ORF	Verified	Phosphatidylglycerolphosphate synthase; catalyzes the synthesis of phosphatidylglycerolphosphate from CDP-diacylglycerol and sn-glycerol 3-phosphate in the first committed and rate-limiting step of cardiolipin biosynthesis
YCL005W	0.1905	0.007	-0.113	0.028	0.152853	194.966	0.800287	7517.31	YCL005W	LDB16		ORF	Verified	Protein involved in lipid droplet (LD) assembly; forms a complex with Sei1p at ER-LD contact sites, stabilizing contact sites; ensures that LDs bud from the ER towards the cytosolic side of the membrane; null mutants have decreased net negative cell surface charge and localized accumulation of phosphatidic acid (PA) marker proteins; GFP-fusion protein expression is induced in response to MMS; nul…
YCL007C	1.1185	0.9565	0.385	0.82	0.385331	0.573068	0.012307	382.191	YCL007C	YCL007C	CWH36	ORF	Dubious	Dubious open reading frame; unlikely to encode a functional protein, based on available experimental and comparative sequence data; overlaps verified ORF YCL005W-A; mutations in YCL007C were thought to confer sensitivity to calcofluor white, but this phenotype was later shown to be due to the defect in YCL005W-A
YCL008C	-0.4475	-0.1815	0.216	-0.137	0.333915	17.7908	0.446304	943.853	YCL008C	STP22	ubiquitin-binding ESCRT-I subunit protein STP22|AGS1|VPL15|VPS23	ORF	Verified	Component of the ESCRT-I complex; ESCRT-I is involved in ubiquitin-dependent sorting of proteins into the endosome; prevents polyubiquitination of the arrestin-related protein Rim8p, thereby directing its monoubiquitination by Rsp5p; homologous to the mouse and human Tsg101 tumor susceptibility gene; mutants exhibit a Class E Vps phenotype;
YCL009C	0.067	-0.239	1.0135	0.28	0.652975	8.32876	0.408423	42813.4	YCL009C	ILV6	acetolactate synthase regulatory subunit	ORF	Verified	Regulatory subunit of acetolactate synthase; acetolactate synthase catalyzes the first step of branched-chain amino acid biosynthesis; enhances activity of the Ilv2p catalytic subunit, localizes to mitochondria
YCL010C	0.1115	0.6135	0.7185	0.481	0.324417	1.40221	0.028975	10074	YCL010C	SGF29		ORF	Verified	Component of the HAT/Core module of the SAGA, SLIK, and ADA complexes; HAT/Core module also contains Gcn5p, Ngg1p, and Ada2p; binds methylated histone H3K4; involved in transcriptional regulation through SAGA and TBP recruitment to target promoters and H3 acetylation
YCL011C	0.0165	0.247	0.6285	0.297	0.309089	3.50405	0.137415	47518.3	YCL011C	GBP2	single-stranded telomeric DNA-binding/mRNA-binding protein|RLF6	ORF	Verified	Poly(A+) RNA-binding protein; key surveillance factor for the selective export of spliced mRNAs from the nucleus to the cytoplasm; preference for intron-containing genes; similar to Npl3p; also binds single-stranded telomeric repeat sequence in vitro; relocalizes to the cytosol in response to hypoxia; GBP2 has a paralog, HRB1, that arose from the whole genome duplication
YCL014W	-0.5595	0.622	0.751	0.271	0.722264	9.83462	0.455926	6762.65	YCL014W	BUD3	YCL012W	ORF	Verified	Guanine nucleotide exchange factor (GEF) for Cdc42p; activates Cdc42p in early G1, accounting for the first stage of biphasic activation, with Cdc24p accounting for the second stage in late G1; involved in the Cdc42p-mediated assembly of the axial landmark that dictates the site for the next round of budding, resulting in the axial budding pattern observed in haploids; localizes with septins to t…
YCL016C	-0.0815	-0.2905	-0.0475	-0.14	0.131584	6.71347	0.32405	661.735	YCL016C	DCC1		ORF	Verified	Subunit of a complex with Ctf8p and Ctf18p; shares some components with Replication Factor C; required for sister chromatid cohesion and telomere length maintenance
YCL017C	-0.9815	0.1045	0.2975	-0.193	0.689503	18.5106	0.579912	29469.5	YCL017C	NFS1	SPL1	ORF	Verified	Cysteine desulfurase; involved in iron-sulfur cluster (Fe/S) biogenesis and in thio-modification of mitochondrial and cytoplasmic tRNAs; essential protein located predominantly in mitochondria
YCL018W	1.431	0.674	1.2975	1.134	0.404068	0.314216	0.007863	44872	YCL018W	LEU2	3-isopropylmalate dehydrogenase	ORF	Verified	Beta-isopropylmalate dehydrogenase (IMDH); catalyzes the third step in the leucine biosynthesis pathway; can additionally catalyze the conversion of beta-ethylmalate into alpha-ketovalerate
YCL021W-A	2.781	2.186	1.3495	2.105	0.719137	0.162296	0.005405	4076.72	YCL021W-A	YCL021W-A		ORF	Uncharacterized	Putative protein of unknown function; SWAT-GFP and mCherry fusion proteins localize to the vacuole
YCL022C	2.258	0	1.904	2.022	1.21443	0.297038	0.276953	267.133	YCL022C	YCL022C		ORF	Dubious	Dubious open reading frame; unlikely to encode a functional protein, based on available experimental and comparative sequence data; completely overlaps verified gene KCC4/YCL024W
YCL023C	0	2.706	1.135	1.659	1.35884	0.493715	0.149755	296.173	YCL023C	YCL023C		ORF	Dubious	Dubious open reading frame; unlikely to encode a functional protein, based on available experimental and comparative sequence data; partially overlaps verified ORF KCC4
YCL024W	0.5845	0.4275	0.4335	0.482	0.0889625	0.382924	0.018737	426.696	YCL024W	KCC4	serine/threonine protein kinase	ORF	Verified	Protein kinase of the bud neck involved in the septin checkpoint; associates with septin proteins, negatively regulates Swe1p by phosphorylation, shows structural homology to bud neck kinases Gin4p and Hsl1p; KCC4 has a paralog, GIN4, that arose from the whole genome duplication
YCL025C	-2.6605	-4.24	-3.3225	-3.408	0.793187	0.068293	0.001556	46145.5	YCL025C	AGP1	amino acid transporter AGP1|YCC5	ORF	Verified	Low-affinity amino acid permease with broad substrate range; involved in uptake of asparagine, glutamine, and other amino acids; expression regulated by SPS plasma membrane amino acid sensor system (Ssy1p-Ptr3p-Ssy5p); AGP1 has a paralog, GNP1, that arose from the whole genome duplication
YCL026C-A	-2.2085	-3.0515	-2.8425	-2.701	0.438992	0.0601739	0.000909	1080.85	YCL026C-A	FRM2	type II nitroreductase|YCLX08C	ORF	Verified	Type II nitroreductase, using NADH as reductant; mutants are defective in fatty acid mediated repression of genes involved in fatty acid biosynthesis indicative of a role in lipid signaling; involved in the oxidative stress response; transcription induction by cadmium and selenite indicates a possible role in the metal stress response; expression induced in cells treated with the mycotoxin patulin
YCL027C-A	0.026	-0.8025	-0.6445	-0.474	0.439876	1.95782	0.073459	18438.7	YCL026C-B	HBN1	putative nitroreductase|YCL027C-A	ORF	Verified	Protein of unknown function; similar to bacterial nitroreductases; green fluorescent protein (GFP)-fusion protein localizes to the cytoplasm and nucleus; protein becomes insoluble upon intracellular iron depletion; protein abundance increases in response to DNA replication stress
YCL027W	0.957	0.017	0.387	0.454	0.473533	2.29741	0.11841	3409.81	YCL027W	FUS1		ORF	Verified	Membrane protein localized to the shmoo tip; required for cell fusion; expression regulated by mating pheromone; proposed to coordinate signaling, fusion, and polarization events required for fusion; potential Cdc28p substrate
YCL028W	-0.412	-0.132	-0.0315	-0.192	0.19718	5.34886	0.107915	33427.5	YCL028W	RNQ1	prion domain-containing protein RNQ1|[PIN(+)]	ORF	Verified	[PIN(+)] prion; an infectious protein conformation that is generally an ordered protein aggregate
YCL029C	-0.286	0.015	0.356	0.028	0.321208	409.704	0.883064	1480.09	YCL029C	BIK1	PAC14|ARM5	ORF	Verified	Microtubule-associated protein; component of the interface between microtubules and kinetochore, involved in sister chromatid separation; essential in polyploid cells but not in haploid or diploid cells; ortholog of mammalian CLIP-170
YCL030C	-0.981	-1.4245	-0.6155	-1.007	0.405126	0.399513	0.024848	43810.6	YCL030C	HIS4	trifunctional histidinol dehydrogenase/phosphoribosyl-AMP cyclohydrolase/phosphoribosyl-ATP diphosphatase	ORF	Verified	Multifunctional enzyme containing phosphoribosyl-ATP pyrophosphatase; phosphoribosyl-AMP cyclohydrolase, and histidinol dehydrogenase activities; catalyzes the second, third, ninth and tenth steps in histidine biosynthesis
YCL031C	0.011	-0.196	-0.3305	-0.172	0.172028	5.8149	0.102575	3662.34	YCL031C	RRP7		ORF	Verified	Essential protein involved in rRNA processing and ribosome biogenesis; protein abundance increases in response to DNA replication stress
YCL032W	0.559	0.441	0.1355	0.378	0.218558	1.52962	0.025491	8186.84	YCL032W	STE50		ORF	Verified	Adaptor protein for various signaling pathways; involved in mating response, invasive/filamentous growth, osmotolerance; acts as an adaptor that links G protein-associated Cdc42p-Ste20p complex to the effector Ste11p to modulate signal transduction
YCL033C	-0.001	-0.21	-0.399	-0.203	0.199084	4.83107	0.161419	17210.6	YCL033C	MXR2	MSRB	ORF	Verified	Methionine-R-sulfoxide reductase; involved in the response to oxidative stress; protects iron-sulfur clusters from oxidative inactivation along with MXR1; involved in the regulation of lifespan
YCL034W	0.517	0.406	0.562	0.495	0.0802932	0.327694	0.001473	61790.6	YCL034W	LSB5		ORF	Verified	Protein involved in membrane-trafficking events at plasma membrane; interacts with actin regulators Sla1p and Las17p, ubiquitin, Arf3p to couple actin dynamics to membrane trafficking processes; similar structure to GGA family of proteins with N-terminal VHS domain and GAT domain; binds Las17p, which is homolog of human Wiskott-Aldrich Syndrome protein involved in actin patch assembly, actin poly…
YCL035C	-0.523	-0.62	-1.459	-0.867	0.514689	0.684709	0.019074	19651.1	YCL035C	GRX1	dithiol glutaredoxin GRX1	ORF	Verified	Glutathione-dependent disulfide oxidoreductase; hydroperoxide and superoxide-radical responsive, heat-stable, with active site cysteine pair; protects cells from oxidative damage; GRX1 has a paralog, GRX2, that arose from the whole genome duplication; protein abundance increases in response to DNA replication stress
YCL036W	-0.234	-0.1015	0.1595	-0.059	0.200216	57.5169	0.571493	3543.54	YCL036W	GFD2	YCD6	ORF	Verified	Protein of unknown function; identified as a high-copy suppressor of a dbp5 mutation; GFD2 has a paralog, YDR514C, that arose from the whole genome duplication
YCL037C	-1.934	-0.8725	-0.4665	-1.091	0.757757	0.63662	0.037662	1211.78	YCL037C	SRO9		ORF	Verified	Cytoplasmic RNA-binding protein; shuttles between nucleus and cytoplasm and is exported from the nucleus in an mRNA export-dependent manner; associates with translating ribosomes; involved in heme regulation of Hap1p as a component of the HMC complex, also involved in the organization of actin filaments; contains a La motif; SRO9 has a paralog, SLF1, that arose from the whole genome duplication
YCL038C	-1.88	-0.365	-0.744	-0.996	0.788391	0.794736	0.044959	15546.6	YCL038C	ATG22	AUT4	ORF	Verified	Vacuolar integral membrane protein required for efflux of amino acids; required for efflux of amino acids during autophagic body breakdown in the vacuole; null mutation causes a gradual loss of viability during starvation
YCL039W	-0.0255	0.115	0.37	0.153	0.200493	8.5648	0.16459	5377.43	YCL039W	GID7	glucose-induced degradation complex subunit GID7|MOH2	ORF	Verified	Subunit of GID Complex that binds directly to central component Vid30p; GID complex is involved in proteasome-dependent catabolite inactivation of fructose-1,6-bisphosphatase; Gid7p contains six WD40 repeats; computational analysis suggests that Gid7p and Moh1p have similar functions
YCL040W	-1.369	-0.3045	0.0715	-0.534	0.74717	2.62021	0.205723	58339.5	YCL040W	GLK1	glucokinase|HOR3	ORF	Verified	Glucokinase; catalyzes the phosphorylation of glucose at C6 in the first irreversible step of glucose metabolism; one of three glucose phosphorylating enzymes; expression regulated by non-fermentable carbon sources; GLK1 has a paralog, EMI2, that arose from the whole genome duplication
YCL041C	-0.855	0	-0.1965	-0.416	0.447821	2.58772	0.294222	404.45	YCL041C	YCL041C		ORF	Dubious	Dubious open reading frame; unlikely to encode a functional protein, based on available experimental and comparative sequence data; partially overlaps both the verified gene PDI1/YCL043C and the uncharacterized gene YCL042W
YCL042W	0	0	0.4975	0.498	0.287232	1.15817	0.115174	531.286	YCL042W	YCL042W		ORF	Uncharacterized	Putative protein of unknown function; epitope-tagged protein localizes to the cytoplasm
YCL043C	-0.424	-0.236	0.0895	-0.19	0.2598	7.19668	0.322327	44507.8	YCL043C	PDI1	protein disulfide isomerase PDI1|TRG1|MFP1	ORF	Verified	Protein disulfide isomerase; multifunctional oxidoreductase of the ER lumen, essential for disulfide bond formation in secretory and cell-surface proteins, processing of non-native disulfide bonds; Ero1p activator; complexes with exomannosidase, Mnl1p to facilitate the recognition of misfolded glycoproteins and the trimming of glycan Man8GlcNAc2 to Man7GlcNAc2 on substrates, thereby accelerating …
YCL044C	-0.374	-0.14	-0.0025	-0.172	0.187827	6.34895	0.171054	9375.72	YCL044C	MGR1		ORF	Verified	Subunit of the mitochondrial (mt) i-AAA protease supercomplex; i-AAA degrades misfolded mitochondrial proteins; forms a subcomplex with Mgr3p that binds to substrates to facilitate proteolysis; required for growth of cells lacking mtDNA
YCL045C	-0.3925	-0.2655	-0.2725	-0.31	0.0713886	0.742858	0.001735	11240.1	YCL045C	EMC1		ORF	Verified	Member of conserved endoplasmic reticulum membrane complex; involved in efficient folding of proteins in the ER; null mutant displays induction of the unfolded protein response; interacts with Gal80p; homologous to worm H17B01.4/EMC-1, fly CG2943, and human KIAA0090
YCL046W	0.4165	-0.594	-0.017	0.041	0.506945	301.574	0.902459	412.409	YCL046W	YCL046W		ORF	Dubious	Dubious open reading frame; unlikely to encode a functional protein, based on available experimental and comparative sequence data; partially overlaps the uncharacterized ORF YCL045C
YCL047C	0.502	0.0325	-0.2175	0.106	0.365288	32.5105	0.568373	2353.72	YCL047C	POF1	nicotinamide-nucleotide adenylyltransferase	ORF	Verified	Nicotinamide mononucleotide-specific adenylyltransferase (NMNAT); catalyzes the conversion of nicotinamide mononucleotide (NMN) to nicotinamide adenine dinucleotide (NAD+); role in the nicotinamide riboside (NR) salvage pathway of NAD+ biosynthesis; involved in NR and NAD+ homeostasis; ATPase involved in protein quality control and filamentation pathways; interacts physically with Kss1p and suppr…
YCL048W	0.022	0.22	0.386	0.209	0.182234	4.17193	0.05993	466.8	YCL048W	SPS22		ORF	Verified	Protein of unknown function; SPS22 has a paralog, SPS2, that arose from the whole genome duplication; redundant with Sps2p for the organization of the beta-glucan layer of the spore wall
YCL049C	-0.04	0.6345	0.7855	0.46	0.439546	2.07725	0.075476	17941.1	YCL049C	YCL049C		ORF	Uncharacterized	Protein of unknown function; localizes to membrane fraction; YCL049C is not an essential gene
YCL050C	0.65	0.4075	0.5285	0.529	0.12125	0.433282	0.001283	15472.8	YCL050C	APA1	bifunctional AP-4-A phosphorylase/ADP sulfurylase|DTP1	ORF	Verified	AP4A phosphorylase; bifunctional diadenosine 5',5'''-P1,P4-tetraphosphate phosphorylase and ADP sulfurylase involved in catabolism of bis(5'-nucleosidyl) tetraphosphates; catalyzes phosphorolysis of dinucleoside oligophosphates, cleaving substrates' alpha/beta-anhydride bond and introducing Pi into the beta-position of the corresponding NDP formed; protein abundance increases under DNA replicatio…
YCL051W	0.158	0.0225	-0.4485	-0.089	0.31834	40.1894	0.579636	34833.7	YCL051W	LRE1		ORF	Verified	Protein involved in control of cell wall structure and stress response; direct inhibitor of the nuclear Dbf2 related (NDR) kinase Cbk1p-Mob2p; overproduction confers resistance to cell-wall degrading enzymes; exhibits genetic interactions with genes involved in the cell wall integrity pathway; LRE1 has a paralog, HLR1, that arose from the whole genome duplication
YCL052C	0.359	0.3385	0.044	0.247	0.176246	2.88885	0.037512	29475	YCL052C	PBN1		ORF	Verified	Component of glycosylphosphatidylinositol-mannosyltransferase I; essential component; required for the autocatalytic post-translational processing of the protease B precursor Prb1p; localizes to ER in lumenal orientation; homolog of mammalian PIG-X
YCL054W	0.683	-0.289	0.0745	0.156	0.491119	20.1808	0.578594	13191.1	YCL054W	SPB1	27S pre-rRNA (guanosine2922-2'-O)-methyltransferase	ORF	Verified	AdoMet-dependent methyltransferase; involved in rRNA processing and 60S ribosomal subunit maturation; methylates G2922 in the tRNA docking site of the large subunit rRNA and in the absence of snR52, U2921; suppressor of PAB1 mutants
YCL055W	0.3865	-0.128	-0.3525	-0.031	0.378865	394.24	0.909566	5005.25	YCL055W	KAR4		ORF	Verified	Transcription factor required for response to pheromones; also required during meiosis; exists in two forms, a slower-migrating form more abundant during vegetative growth and a faster-migrating form induced by pheromone
YCL056C	1.002	0.6275	0.4335	0.687	0.288986	0.612299	0.007034	3112.93	YCL056C	PEX34		ORF	Verified	Protein that regulates peroxisome populations; peroxisomal integral membrane protein; interacts with Pex11p, Pex25p, and Pex27p to control both constitutive peroxisome division and peroxisome morphology and abundance during peroxisome proliferation
YCL057C-A	-0.322	-0.813	-0.825	-0.653	0.287006	0.673076	0.00847	12990.3	YCL057C-A	MIC10	MOS1|MCS10|MIO10	ORF	Verified	Conserved component of the MICOS complex; MICOS (formerly MINOS or MitOS) is a mitochondrial inner membrane complex that extends into the intermembrane space and has a role in the maintenance of crista junctions, inner membrane architecture, and formation of contact sites to the outer membrane; forms a subcomplex with Mic12p and Mic27p whose assembly and stability requires cardiolipin; homo-oligo…
YCL057W	-0.311	0.077	0.151	-0.028	0.248148	316.515	0.893903	44217.9	YCL057W	PRD1	metalloendopeptidase	ORF	Verified	Zinc metalloendopeptidase; found in the cytoplasm and intermembrane space of mitochondria; with Cym1p, involved in degradation of mitochondrial proteins and of presequence peptides cleaved from imported proteins; protein abundance increases in response to DNA replication stress
YCL058C	0	0	2.308	2.308	1.33252	0.250152	1	259.5	YCL058C	FYV5	MDF1	ORF	Verified	Protein involved in regulation of the mating pathway; binds with Matalpha2p to promoters of haploid-specific genes; required for survival upon exposure to K1 killer toxin; involved in ion homeostasis
YCL059C	0.109	-0.6265	-0.7745	-0.431	0.473187	2.54729	0.107318	2336.13	YCL059C	KRR1	ribosome biosynthesis protein KRR1	ORF	Verified	Nucleolar protein required for rRNA synthesis and ribosomal assembly; required for the synthesis of 18S rRNA and for the assembly of 40S ribosomal subunit; essential gene
YCL061C	0.876	0.072	0.0265	0.325	0.477866	4.52418	0.239787	528.293	YCL061C	MRC1	chromatin-modulating protein MRC1|YCL060C	ORF	Verified	S-phase checkpoint protein required for DNA replication; couples DNA helicase and polymerase; interacts with and stabilizes Pol2p at stalled replication forks during stress, where it forms a pausing complex with Tof1p and is phosphorylated by Mec1p; defines a novel S-phase checkpoint with Hog1p that coordinates DNA replication and transcription upon osmostress; protects uncapped telomeres; Dia2p-…
YCL063W	0.5345	0.846	0.753	0.711	0.159908	0.316323	0.005474	1255.9	YCL063W	VAC17	YCL062W	ORF	Verified	Phosphoprotein involved in vacuole inheritance; degraded in late M phase of the cell cycle; acts as a vacuole-specific receptor for myosin Myo2p; involved in regulation of asymmetric inheritance of aggregated/misfolded proteins and age reset
YCL064C	0.903	0.5735	0.792	0.756	0.167647	0.293327	0.00117	14567.3	YCL064C	CHA1	L-serine/L-threonine ammonia-lyase CHA1	ORF	Verified	Catabolic L-serine (L-threonine) deaminase; catalyzes the degradation of both L-serine and L-threonine; required to use serine or threonine as the sole nitrogen source, transcriptionally induced by serine and threonine
YCL065W	0	0	0.239	0.239	0.137987	2.41569	1	382.111	YCL065W	YCL065W		ORF	Dubious	Dubious open reading frame; unlikely to encode a functional protein, based on available experimental and comparative sequence data; overlaps HMLALPHA1
YCL066W	0.3705	-0.36	-0.3825	-0.124	0.428397	27.8614	0.64449	5368.53	YCL066W	HMLALPHA1	transcriptional co-activator mating type protein alpha|ALPHA1	ORF	Verified|silenced_gene	Silenced copy of ALPHA1 at HML; ALPHA1 encodes a transcriptional coactivator involved in the regulation of mating-type alpha-specific gene expression
YCL067C	0.752	0.1525	0.238	0.381	0.32427	2.23387	0.07605	65107.1	YCL067C	HMLALPHA2	homeodomain mating type protein alpha2|ALPHA2	ORF	Verified|silenced_gene	Silenced copy of ALPHA2 at HML; homeobox-domain protein that associates with Mcm1p in haploid cells to repress a-specific gene expression and interacts with a1p in diploid cells to repress haploid-specific gene expression
YCL068C	-0.0685	0.115	0.171	0.072	0.125279	24.1664	0.274014	1216.85	YCL068C	YCL068C		ORF	Uncharacterized	Putative protein of unknown function
YCL069W	1.058	0	0.218	0.498	0.558642	2.25255	0.344549	369.5	YCL069W	VBA3	basic amino acid transporter	ORF	Verified	Permease of basic amino acids in the vacuolar membrane; VBA3 has a paralog, VBA5, that arose from a segmental duplication
YCL073C	-0.7485	-0.8055	-1.0955	-0.883	0.186082	0.238661	0.001403	465.985	YCL073C	GEX1	glutathione exchanger	ORF	Verified	Proton:glutathione antiporter; localized to the vacuolar and plasma membranes; imports glutathione from the vacuole and exports it through the plasma membrane; has a role in resistance to oxidative stress and modulation of the PKA pathway; GEX1 has a paralog, GEX2, that arose from a segmental duplication
YCL076W	0	0	-0.955	-0.955	0.55137	0.604555	1	369.688	YCL076W	YCL076W		ORF	Dubious	Dubious open reading frame; unlikely to encode a functional protein, based on available experimental and comparative sequence data
YCR001W	0	0	0.1835	0.184	0.105944	3.12925	0.856992	340.063	YCR001W	YCR001W		ORF	Uncharacterized	Putative protein of unknown function; conserved among S. cerevisiae strains; YCR001W is not an essential gene
YCR002C	0.7545	0.3305	0.1885	0.424	0.294476	1.63802	0.047592	23200.8	YCR002C	CDC10	septin CDC10	ORF	Verified	Component of the septin ring, required for cytokinesis; septins are GTP-binding proteins that assemble into rod-like hetero-oligomers that can associate to form filaments; septin rings at the mother-bud neck act as scaffolds for recruiting cell division factors and as barriers to prevent diffusion of specific proteins between mother and daughter cells; N-terminus interacts with phosphatidylinosit…
YCR003W	0.952	0.701	0.0245	0.559	0.479741	1.53527	0.062991	2770.88	YCR003W	MRPL32	mitochondrial 54S ribosomal protein YmL32|YmL32	ORF	Verified	Mitochondrial ribosomal protein of the large subunit; protein abundance increases in response to DNA replication stress
YCR004C	0.0835	0.2045	-0.041	0.082	0.122754	18.2561	0.258499	30613	YCR004C	YCP4	flavodoxin-like fold family protein	ORF	Verified	Protein of unknown function; has sequence and structural similarity to flavodoxins; predicted to be palmitoylated; the authentic, non-tagged protein is detected in highly purified mitochondria in high-throughput studies
YCR005C	-1.925	-1.9855	-1.875	-1.929	0.0553331	0.0148703	0.000114	45178.5	YCR005C	CIT2	citrate (Si)-synthase CIT2	ORF	Verified	Citrate synthase, peroxisomal isozyme involved in glyoxylate cycle; catalyzes condensation of acetyl coenzyme A and oxaloacetate to form citrate; expression is controlled by Rtg1p and Rtg2p transcription factors; SCF-Ucc1 regulates level of Cit2p to maintain citrate homeostasis; oxaloacetate-dependent positive feedback loop inhibits Cit2p ubiquitination; CIT2 has a paralog, CIT1, that arose from …
YCR006C	-1.2785	-0.351	-0.439	-0.689	0.511983	1.07849	0.045236	1915.15	YCR006C	YCR006C		ORF	Uncharacterized	Putative protein of unknown function; conserved among S. cerevisiae strains; YCR006C is not an essential gene
YCR007C	0.06	-0.335	-0.3585	-0.211	0.235131	5.28135	0.120073	3442.26	YCR007C	YCR007C	DUP240 family protein	ORF	Uncharacterized	Putative integral membrane protein; member of DUP240 gene family; SWAT-GFP and mCherry fusion proteins localize to the cell periphery and vacuole; YCR007C is not an essential gene
YCR008W	-0.2745	0.1065	-0.2	-0.123	0.20193	13.3472	0.250961	6103.93	YCR008W	SAT4	serine/threonine protein kinase SAT4|HAL4	ORF	Verified	Ser/Thr protein kinase involved in salt tolerance; funtions in regulation of Trk1p-Trk2p potassium transporter; overexpression affects the Fe-S and lipoamide containing proteins in the mitochondrion; required for lipoylation of Lat1p, Kgd2p and Gcv3p; partially redundant with Hal5p; has similarity to Npr1p; localizes to the cytoplasm and mitochondrion
YCR009C	-0.1	0.305	0.015	0.073	0.208706	39.1643	0.599249	36222.9	YCR009C	RVS161	amphiphysin-like protein RVS161|SPE161|FUS7|END6	ORF	Verified	Amphiphysin-like lipid raft protein; N-BAR domain protein that interacts with Rvs167p and regulates polarization of the actin cytoskeleton, endocytosis, cell polarity, cell fusion and viability following starvation or osmotic stress
YCR010C	0.382	0.4895	0.013	0.295	0.249923	2.87185	0.055611	39644	YCR010C	ADY2	ATO1	ORF	Verified	Acetate transporter required for normal sporulation; phosphorylated in mitochondria; ADY2 has a paralog, ATO2, that arose from the whole genome duplication
YCR011C	-0.306	0.485	0.767	0.315	0.556257	5.60602	0.266537	58788.2	YCR011C	ADP1	putative ATP-dependent permease ADP1	ORF	Verified	Putative ATP-dependent permease of the ABC transporter family
YCR012W	-1.681	-0.5625	-0.106	-0.783	0.810356	1.32176	0.093342	43804.5	YCR012W	PGK1	phosphoglycerate kinase	ORF	Verified	3-phosphoglycerate kinase; catalyzes transfer of high-energy phosphoryl groups from the acyl phosphate of 1,3-bisphosphoglycerate to ADP to produce ATP; key enzyme in glycolysis and gluconeogenesis
YCR013C	0.3045	0.4755	0.047	0.276	0.2157	2.8316	0.058657	566.227	YCR013C	YCR013C		ORF	Dubious	Dubious open reading frame; unlikely to encode a functional protein, based on available experimental and comparative sequence data; transcription of both YCR013C and the overlapping essential gene PGK1 is reduced in a gcr1 null mutant
YCR014C	-1.5865	-0.4465	-0.441	-0.825	0.659773	0.969363	0.048915	3778.78	YCR014C	POL4	DNA-directed DNA polymerase IV|POLX	ORF	Verified	DNA polymerase IV; undergoes pair-wise interactions with Dnl4p-Lif1p and Rad27p to mediate repair of DNA double-strand breaks by non-homologous end joining (NHEJ); homologous to mammalian DNA polymerase beta
YCR015C	-0.317	-0.152	-0.346	-0.272	0.104644	1.41441	0.045491	1985.28	YCR015C	CTO1		ORF	Verified	Protein required for cold tolerance; involved in phosphate uptake; YCR015C is not an essential gene
YCR016W	0.3035	-0.547	-0.3115	-0.185	0.439135	12.8308	0.411211	6840.81	YCR016W	YCR016W		ORF	Uncharacterized	Putative protein of unknown function; green fluorescent protein (GFP)-fusion protein localizes to the nucleolus and nucleus; predicted to be involved in ribosome biogenesis
YCR017C	0.3275	0.2715	0.296	0.298	0.0280728	0.316121	0.000694	17082.1	YCR017C	CWH43		ORF	Verified	GPI lipid remodelase; responsible for introducing ceramides into GPI anchors having a C26:0 fatty acid in sn-2 of the glycerol moiety; can also use lyso-GPI protein anchors and various base resistant lipids as substrates; contains 14-16 transmembrane segments and several putative glycosylation and phosphorylation sites; null mutation is synthetically lethal with pkc1 deletion
YCR018C	1.5975	0	0.3335	0.966	0.842706	0.903071	0.177202	379.5	YCR018C	SRD1		ORF	Verified	Protein involved in the processing of pre-rRNA to mature rRNA; contains a C2/C2 zinc finger motif; srd1 mutation suppresses defects caused by the rrp1-1 mutation
YCR018C-A	0	0	0.637	0.637	0.367772	0.906358	0.099715	291.625	YCR018C-A	YCR018C-A		ORF	Dubious	Putative protein of unknown function; encoded opposite a Ty1 LTR
YCR019W	-0.1935	-0.033	-0.299	-0.175	0.133944	4.37369	0.171844	6114.46	YCR019W	MAK32		ORF	Verified	Protein necessary for stability of L-A dsRNA-containing particles
YCR020C	-0.0665	-0.1645	-0.174	-0.135	0.0595126	3.26544	0.049527	3427.09	YCR020C	PET18	HIT2	ORF	Verified	Protein of unknown function; has weak similarity to proteins involved in thiamin metabolism; expression is induced in the absence of thiamin
YCR020C-A	-0.5455	0.4255	-0.608	-0.243	0.579493	9.81376	0.40746	4917.1	YCR020C-A	MAK31	NAA38|SMX1|LSM9	ORF	Verified	Non-catalytic subunit of N-terminal acetyltransferase of the NatC type; required for replication of dsRNA virus; member of the Sm protein family
YCR020W-B	0	0	0.083	0.083	0.0479201	6.95603	0.570465	476.909	YCR020W-B	HTL1		ORF	Verified	Component of the RSC chromatin remodeling complex; RSC functions in transcriptional regulation and elongation, chromosome stability, and establishing sister chromatid cohesion; involved in telomere maintenance
YCR021C	-0.6145	-0.082	-0.161	-0.286	0.287361	3.51315	0.384413	45716	YCR021C	HSP30	YRO1	ORF	Verified	Negative regulator of the H(+)-ATPase Pma1p; stress-responsive protein; hydrophobic plasma membrane localized; induced by heat shock, ethanol treatment, weak organic acid, glucose limitation, and entry into stationary phase
YCR022C	-0.557	-0.2505	-0.695	-0.501	0.227511	0.906413	0.020049	463.279	YCR022C	YCR022C		ORF	Uncharacterized	Putative protein of unknown function; conserved among S. cerevisiae strains; YCR022C is not an essential gene
YCR023C	-1.49	-0.4365	-0.7055	-0.877	0.547367	0.711671	0.022838	2008.96	YCR023C	YCR023C		ORF	Verified	Vacuolar membrane protein of unknown function; member of the multidrug resistance family; YCR023C is not an essential gene
YCR024C	0.0175	-0.125	-0.1375	-0.082	0.086108	12.8061	0.320707	2971.44	YCR024C	SLM5	asparagine--tRNA ligase SLM5	ORF	Verified	Mitochondrial asparaginyl-tRNA synthetase
YCR024C-A	-2.7005	-0.95	-1.6065	-1.753	0.884315	0.287768	0.011706	15092.4	YCR024C-A	PMP1	proteolipid ATPase	ORF	Verified	Regulatory subunit for the plasma membrane H(+)-ATPase Pma1p; small single-membrane span proteolipid; forms unique helix and positively charged cytoplasmic domain that is able to specifically segregate phosphatidylserines; PMP1 has a paralog, PMP2, that arose from the whole genome duplication
YCR025C	-1.5395	-0.526	-0.5515	-0.872	0.577924	0.760042	0.028889	1160.07	YCR025C	YCR025C		ORF	Uncharacterized	Putative protein of unknown function; conserved across S. cerevisiae strains; YCR025C is not an essential gene
YCR026C	0.206	0.052	0.178	0.145	0.0820325	3.90167	0.093202	37029	YCR026C	NPP1	nucleotide diphosphatase/phosphodiesterase NPP1	ORF	Verified	Nucleotide pyrophosphatase/phosphodiesterase; mediates extracellular nucleotide phosphate hydrolysis along with Npp2p and Pho5p; activity and expression enhanced during conditions of phosphate starvation; involved in spore wall assembly; NPP1 has a paralog, NPP2, that arose from the whole genome duplication, and an npp1 npp2 double mutant exhibits reduced dityrosine fluorescence relative to the s…
YCR027C	0.505	0.014	0.191	0.237	0.248665	4.42709	0.149212	1950.04	YCR027C	RHB1	putative GTPase RHB1|RSG1	ORF	Verified	Putative Rheb-related GTPase; involved in regulating canavanine resistance and arginine uptake; member of the Ras superfamily of G-proteins
YCR028C	-2.2265	-0.1855	-0.2245	-0.879	1.16728	1.51076	0.162187	4865.46	YCR028C	FEN2		ORF	Verified	Plasma membrane H+-pantothenate symporter; confers sensitivity to the antifungal agent fenpropimorph; relocalizes from vacuole to cytoplasm upon DNA replication stress
YCR028C-A	0.983	0.487	0.009	0.493	0.487028	2.00383	0.08149	16555.3	YCR028C-A	RIM1		ORF	Verified	ssDNA-binding protein essential for mitochondrial genome maintenance; involved in mitochondrial DNA replication; stimulates utilization by Mip1p DNA polymerase of RNA primers synthesized by Rpo41p
YCR030C	-0.5715	-0.035	-0.112	-0.24	0.290087	5.03623	0.161327	20294.2	YCR030C	SYP1	YCR029C-A	ORF	Verified	Negative regulator of WASP-Arp23 complex; involved in endocytic site formation; directly inhibits Las17p stimulation of Arp23 complex-mediated actin assembly in vitro; may regulate assembly and disassembly of the septin ring; colocalizes and interacts with septin subunits; potential role in actin cytoskeletal organization
YCR031C	-0.751	-0.8775	-1.0385	-0.889	0.144095	0.182324	0.00062	18804.3	YCR031C	RPS14A	uS11|ribosomal 40S subunit protein S14A|S11|rp59A|S14A|RPL59|CRY1	ORF	Verified	Protein component of the small (40S) ribosomal subunit; required for ribosome assembly and 20S pre-rRNA processing; mutations confer cryptopleurine resistance; homologous to mammalian ribosomal protein S14 and bacterial S11; RPS14A has a paralog, RPS14B, that arose from the whole genome duplication
YCR032W	-0.3085	-0.349	-0.113	-0.257	0.126199	1.91068	0.017968	39027.3	YCR032W	BPH1		ORF	Verified	Protein homologous to Chediak-Higashi syndrome and Beige proteins; both of which are implicated in disease syndromes in human and mouse, respectively, due to defective lysosomal trafficking; mutant phenotype and genetic interactions suggest a role in protein sorting
YCR033W	-0.6465	-0.2765	-0.124	-0.349	0.268689	2.20597	0.051019	22668.8	YCR033W	SNT1		ORF	Verified	Subunit of the Set3C deacetylase complex; interacts directly with the Set3C subunit, Sif2p; putative DNA-binding protein; mutant has increased aneuploidy tolerance; relocalizes to the cytosol in response to hypoxia
YCR034W	0.202	-0.2755	-0.4965	-0.19	0.357013	9.88956	0.298331	14081.5	YCR034W	ELO2	fatty acid elongase ELO2|FEN1|VBM2|GNS1	ORF	Verified	Fatty acid elongase, involved in sphingolipid biosynthesis; acts on fatty acids of up to 24 carbons in length; mutations have regulatory effects on 1,3-beta-glucan synthase, vacuolar ATPase, and the secretory pathway; ELO2 has a paralog, ELO1, that arose from the whole genome duplication; lethality of the elo2 elo3 double null mutation is functionally complemented by human ELOVL1 and weakly compl…
YCR035C	0.4075	0.0815	0.42	0.303	0.191926	2.0905	0.023599	9777.75	YCR035C	RRP43	exosome non-catalytic core subunit RRP43	ORF	Verified	Exosome non-catalytic core component; involved in 3'-5' RNA processing and degradation in both the nucleus and the cytoplasm; has similarity to E. coli RNase PH and to human hRrp43p (OIP2, EXOSC8); protein abundance increases in response to DNA replication stress
YCR036W	-0.029	0.1685	0.205	0.115	0.125893	9.51933	0.159687	49636.9	YCR036W	RBK1	putative ribokinase	ORF	Verified	Putative ribokinase
YCR037C	-0.7605	-0.3345	-0.4	-0.498	0.229393	0.924956	0.011341	22924	YCR037C	PHO87	SPX domain-containing inorganic phosphate transporter	ORF	Verified	Low-affinity inorganic phosphate (Pi) transporter; acts upstream of Pho81p in regulation of the PHO pathway; expression is independent of Pi concentration and Pho4p activity; contains 12 membrane-spanning segments; PHO87 has a paralog, PHO90, that arose from the whole genome duplication
YCR038C	-0.3685	-0.047	-0.058	-0.158	0.182526	7.31155	0.119607	3281.74	YCR038C	BUD5	Ras family guanine nucleotide exchange factor BUD5	ORF	Verified	GTP/GDP exchange factor for Rsr1p (Bud1p); required for both axial and bipolar budding patterns; mutants exhibit random budding in all cell types
YCR038W-A	0	0	1.1445	1.144	0.660777	0.504897	0.270556	275.844	YCR038W-A	YCR038W-A		ORF	Dubious	Dubious open reading frame; unlikely to encode a functional protein, based on available experimental and comparative sequence data; completely overlaps the verified gene BUD5/YCR038C; identified by homology with hemiascomycetous yeast species
YCR039C	0.83	0.1865	0.1695	0.395	0.376528	2.41326	0.082338	65584.4	YCR039C	MATALPHA2	homeodomain mating type protein alpha2|ALPHA2	ORF	Verified	Homeobox-domain protein; with Mcm1p, represses a-specific genes in haploids; acts with A1p to repress transcription of haploid-specific genes in diploids; one of two genes encoded by the MATalpha mating type cassette
YCR040W	0.3665	-0.3785	-0.3825	-0.131	0.431285	25.1317	0.586764	5423.43	YCR040W	MATALPHA1	transcriptional co-activator mating type protein alpha|ALPHA1	ORF	Verified	Transcriptional co-activator that regulates mating-type-specific genes; targets the transcription factor Mcm1p to the promoters of alpha-specific genes; one of two genes encoded by the MATalpha mating type cassette
YCR041W	0.422	-0.2225	-0.306	-0.036	0.3984	307.408	0.879944	4261.97	YCR041W	YCR041W		ORF	Verified	Protein of unknown function; overexpression suppresses the high-frequency loss of mini-chromosomes, probably by increasing the rate of proper chromosome segregation; translated gene product of YCR041W, but not its transcript, is responsible for suppression; suppression ability of YCR041W is completely dependent on silencing protein Sir4p
YCR042C	-0.066	-0.2575	-0.2195	-0.181	0.101389	3.09481	0.077577	15408.1	YCR042C	TAF2	TafII150|TSM1|TAF150	ORF	Verified	TFIID subunit (150 kDa); involved in RNA polymerase II transcription initiation
YCR043C	0.7315	-0.087	-0.286	0.119	0.539266	38.0811	0.682854	884.75	YCR043C	YCR043C		ORF	Uncharacterized	Putative protein of unknown function; green fluorescent protein (GFP)-fusion protein localizes to the Golgi apparatus; YCR043C is not an essential gene
YCR044C	-0.7435	-0.0155	0.0125	-0.249	0.428623	6.91316	0.256823	22313.3	YCR044C	PER1	COS16	ORF	Verified	Protein of the endoplasmic reticulum; required for GPI-phospholipase A2 activity that remodels the GPI anchor as a prerequisite for association of GPI-anchored proteins with lipid rafts; functionally complemented by human ortholog PERLD1
YCR045C	-0.9025	-0.782	-0.5745	-0.753	0.165912	0.292609	0.001824	1067.13	YCR045C	RRT12	OSW3	ORF	Verified	Probable subtilisin-family protease; role in formation of the dityrosine layer of spore walls; localizes to the spore wall and also the nuclear envelope and ER region in mature spores
YCR046C	0.7115	0.4885	0.6495	0.616	0.115104	0.30334	0.000793	40790.5	YCR046C	IMG1	mitochondrial 54S ribosomal protein IMG1	ORF	Verified	Mitochondrial ribosomal protein of the large subunit; required for respiration and for maintenance of the mitochondrial genome
YCR047C	0.3025	0.4245	0.863	0.53	0.294767	1.04937	0.017423	11932.1	YCR047C	BUD23	18S rRNA (guanine1575-N7)-methyltransferase	ORF	Verified	Methyltransferase that methylates residue G1575 of 18S rRNA; required for rRNA processing and nuclear export of 40S ribosomal subunits independently of methylation activity; diploid mutant displays random budding pattern; functional homolog of human WBSCR22
YCR048W	-0.9795	-0.012	0.8115	-0.06	0.896464	249.018	0.912328	15380.8	YCR048W	ARE1	sterol acyltransferase|SAT2	ORF	Verified	Acyl-CoA:sterol acyltransferase; endoplasmic reticulum enzyme that contributes the major sterol esterification activity in the absence of oxygen; ARE1 has a paralog, ARE2, that arose from the whole genome duplication
YCR049C	0.913	0	0.8665	0.882	0.514223	0.66102	0.002996	320.472	YCR049C	YCR049C		ORF	Dubious	Dubious open reading frame; unlikely to encode a functional protein, based on available experimental and comparative sequence data
YCR050C	0.858	0	-0.1595	0.349	0.547252	4.493	0.704378	453.324	YCR050C	YCR050C		ORF	Uncharacterized	Non-essential protein of unknown function; deletion mutant is synthetically sick or lethal with alpha-synuclein
YCR051W	0.8085	0.363	0.689	0.62	0.230589	0.599866	0.00522	17364.5	YCR051W	YCR051W		ORF	Uncharacterized	Putative protein of unknown function; green fluorescent protein (GFP)-fusion protein localizes to the cytoplasm and nucleus; contains ankyrin (Ank) repeats; YCR051W is not an essential gene
YCR052W	0.021	0.0075	0.5285	0.186	0.296979	8.5842	0.235992	23448.8	YCR052W	RSC6		ORF	Verified	Component of the RSC chromatin remodeling complex; essential for mitotic growth; RSC6 has a paralog, SNF12, that arose from the whole genome duplication
YCR053W	-0.1715	-0.7215	-0.6875	-0.527	0.308197	1.1097	0.023795	37527.9	YCR053W	THR4	threonine synthase THR4	ORF	Verified	Threonine synthase; conserved protein that catalyzes formation of threonine from O-phosphohomoserine; expression is regulated by the GCN4-mediated general amino acid control pathway
YCR054C	-0.483	-0.1	0.2465	-0.112	0.364902	29.0898	0.579269	2088.1	YCR054C	CTR86		ORF	Verified	Essential protein of unknown function; with orthologs in Ashbya gossypii and Candida albicans; similar to human ATXN10, mutations in which cause spinocerebellar ataxia type 10; codon usage corresponds to that observed for yeast genes expressed at low levels; relative distribution to the nucleus increases upon DNA replication stress
YCR057C	-0.517	-1.0385	-0.722	-0.759	0.262729	0.456063	0.004137	2990.38	YCR057C	PWP2	snoRNA-binding rRNA-processing protein PWP2|UTP1|YCR058C|YCR055C	ORF	Verified	Conserved 90S pre-ribosomal component; essential for proper endonucleolytic cleavage of the 35 S rRNA precursor at A0, A1, and A2 sites; contains eight WD-repeats; PWP2 deletion leads to defects in cell cycle and bud morphogenesis
YCR059C	-0.356	-0.219	0.3605	-0.071	0.380342	75.4498	0.722301	30162.9	YCR059C	YIH1		ORF	Verified	Negative regulator of eIF2 kinase Gcn2p; competes with Gcn2p for binding to Gcn1p; may contribute to regulation of translation in response to starvation via regulation of Gcn2p; binds to monomeric actin and to ribosomes and polyribosomes; ortholog of mammalian IMPACT
YCR060W	-0.4765	-0.349	-0.4625	-0.429	0.069922	0.379926	0.002473	4347.12	YCR060W	TAH1		ORF	Verified	Component of conserved R2TP complex (Rvb1-Rvb2-Tah1-Pih1); R2TP complex interacts with Hsp90 (Hsp82p and Hsc82p) to mediate assembly of large protein complexes such as box C/D snoRNPs and RNA polymerase II; contains a single TPR domain with at least two TPR motifs; plays a role in determining prion variants
YCR061W	-2.7135	-0.1065	-0.1265	-0.982	1.49941	1.55488	0.209118	46376.1	YCR061W	YCR061W	YCR062W	ORF	Uncharacterized	Protein of unknown function; green fluorescent protein (GFP)-fusion protein localizes to the cytoplasm in a punctate pattern; induced by treatment with 8-methoxypsoralen and UVA irradiation
YCR063W	-0.256	0.409	0.437	0.197	0.392271	10.1077	0.450793	626.044	YCR063W	BUD31	U2 snRNP complex subunit BUD31|CWC14	ORF	Verified	Component of the SF3b subcomplex of the U2 snRNP; increases efficiency of first and second step pre-mRNA splicing; diploid mutants display a random budding pattern instead of the wild-type bipolar pattern; facilitates passage through G1/S Start, but is not required for G2/M transition or exit from mitosis
YCR064C	-0.844	0.0835	-0.182	-0.314	0.477666	4.84468	0.298227	552.618	YCR064C	YCR064C		ORF	Dubious	Dubious open reading frame; unlikely to encode a functional protein, based on available experimental and comparative sequence data; partially overlaps the verified gene BUD31
YCR065W	-2.427	0.293	0.15	-0.661	1.53078	3.50357	0.389335	1759.46	YCR065W	HCM1		ORF	Verified	Forkhead transcription factor; drives S-phase activation of genes involved in chromosome segregation, spindle dynamics, budding; also activates genes involved in respiration, use of alternative energy sources (like proline), NAD synthesis, oxidative stress resistance; key factor in early adaptation to nutrient deficiency and diauxic shift; suppressor of calmodulin mutants with specific SPB assemb…
YCR066W	0.2815	-0.4825	-0.3845	-0.195	0.415703	10.9324	0.373622	1019.09	YCR066W	RAD18	E3 ubiquitin-protein ligase RAD18	ORF	Verified	E3 ubiquitin ligase; forms heterodimer with Rad6p to monoubiquitinate PCNA-K164; heterodimer binds single-stranded DNA and has single-stranded DNA dependent ATPase activity; required for postreplication repair; SUMO-targeted ubiquitin ligase (STUbl) that contains a SUMO-interacting motif (SIM) which stimulates its ubiquitin ligase activity towards the sumoylated form of PCNA
YCR067C	0.368	0.0755	-0.091	0.118	0.232364	16.6881	0.436125	11951.4	YCR067C	SED4		ORF	Verified	Integral ER membrane protein that stimulates Sar1p GTPase activity; involved in COPII vesicle budding through disassociation of coat proteins from membranes onto liposomes; binds Sec16p; SED4 has a paralog, SEC12, that arose from the whole genome duplication
YCR068W	-0.841	0.6795	1.121	0.32	1.02926	10.0514	0.538997	3803.19	YCR068W	ATG15	triglyceride lipase ATG15|CVT17|AUT5	ORF	Verified	Phospholipase; preferentially hydrolyses phosphatidylserine, with minor activity against cardiolipin and phosphatidylethanolamine; required for lysis of autophagic and CVT bodies; targeted to intravacuolar vesicles during autophagy via the multivesicular body (MVB) pathway; required for the maintenance of lipid droplet quantity after the diauxic shift; regulates lipolysis; expression regulated by…
YCR069W	-0.2725	-0.28	0.128	-0.142	0.233424	11.5763	0.277197	66891.2	YCR069W	CPR4	peptidylprolyl isomerase family protein CPR4|SCC3|YCR070W|CYP4	ORF	Verified	Peptidyl-prolyl cis-trans isomerase (cyclophilin); catalyzes the cis-trans isomerization of peptide bonds N-terminal to proline residues; has a potential role in the secretory pathway; CPR4 has a paralog, CPR8, that arose from the whole genome duplication
YCR071C	1.173	0.936	0.6805	0.93	0.246308	0.284782	0.002709	4850.69	YCR071C	IMG2	mitochondrial 54S ribosomal protein IMG2	ORF	Verified	Mitochondrial ribosomal protein of the large subunit; conserved in metazoa, with similarity to human mitochondrial ribosomal protein MRPL49
YCR072C	0.613	0.0885	0.84	0.514	0.385439	1.45891	0.040759	3110.94	YCR072C	RSA4		ORF	Verified	WD-repeat protein involved in ribosome biogenesis; may interact with ribosomes; required for maturation and efficient intra-nuclear transport or pre-60S ribosomal subunits, localizes to the nucleolus
YCR073C	0.7595	-0.233	0.18	0.236	0.498572	8.95167	0.351617	15980.2	YCR073C	SSK22	mitogen-activated protein kinase kinase kinase SSK22	ORF	Verified	MAP kinase kinase kinase of HOG1 mitogen-activated signaling pathway; functionally redundant with Ssk2p; interacts with and is activated by Ssk1p; phosphorylates Pbs2p; SSK22 has a paralog, SSK2, that arose from the whole genome duplication
YCR073W-A	-0.075	0.0145	1.05	0.33	0.625286	5.74184	0.344094	33678.5	YCR073W-A	SOL2	YCRX13W	ORF	Verified	Protein with a possible role in tRNA export; shows similarity to 6-phosphogluconolactonase non-catalytic domains but does not exhibit this enzymatic activity; homologous to Sol3p and Sol4p; SOL2 has a paralog, SOL1, that arose from the whole genome duplication
YCR075C	0.479	0.3935	0.535	0.469	0.0712607	0.32397	0.003137	8246.32	YCR075C	ERS1	cystinosin-like protein ERS1	ORF	Verified	Protein involved in cystine transport; localizes to the vacuole, plasma membrane and endosome; similarity to human cystinosin, a H(+)-driven transporter involved in L-cystine export from lysosomes and implicated in the disease cystinosis; contains seven transmembrane domains; mutation is functionally complemented by human CTNS
YCR076C	0.2985	-0.0665	0.046	0.093	0.186921	21.6119	0.362392	22535.7	YCR076C	FUB1		ORF	Verified	Proteasome-binding protein; interacts physically with multiple subunits of the 20S proteasome and genetically with genes encoding 20S core particle and 19S regulatory particle subunits; exhibits boundary activity which blocks the propagation of heterochromatic silencing; contains a PI31 proteasome regulator domain and sequence similarity with human PSMF1, a proteasome inhibitor; not an essential …
YCR077C	-1.2325	-0.1005	0.037	-0.432	0.696654	3.73293	0.230359	8331.76	YCR077C	PAT1	MRT1	ORF	Verified	Deadenylation-dependent mRNA-decapping factor; also required for faithful chromosome transmission, maintenance of rDNA locus stability, and protection of mRNA 3'-UTRs from trimming; associated with topoisomerase II; binds to mRNAs under glucose starvation, most often in the 3' UTR; functionally linked to Pab1p; forms cytoplasmic foci upon DNA replication stress; phosphorylation by PKA inhibits P …
YCR079W	-0.954	0.149	0.1455	-0.22	0.635809	13.1366	0.503483	6233.1	YCR079W	PTC6	type 2C protein phosphatase PTC6|PPP2|AUP1	ORF	Verified	Mitochondrial type 2C protein phosphatase (PP2C); has similarity to mammalian PP1Ks; involved in mitophagy; null mutant is sensitive to rapamycin and has decreased phosphorylation of the Pda1 subunit of pyruvate dehydrogenase
YCR081W	-0.336	-0.201	-0.187	-0.241	0.082282	1.41668	0.011194	7586.5	YCR081W	SRB8	MED12|YCR080W|SSN5|NUT6|GIG1	ORF	Verified	Subunit of the RNA polymerase II mediator complex; associates with core polymerase subunits to form the RNA polymerase II holoenzyme; essential for transcriptional regulation; involved in glucose repression
YCR082W	-0.3495	-0.1365	-0.3765	-0.288	0.131465	1.58498	0.018928	8253.37	YCR082W	AHC2		ORF	Verified	Component of the ADA histone acetyltransferase complex; Ahc2p and Ahc1p are unique to the ADA complex and not shared with the related SAGA and SLIK complexes; may tether Ahc1p to the complex
YCR083W	-0.3335	-0.013	-0.5055	-0.284	0.249953	3.09901	0.098642	22222.3	YCR083W	TRX3		ORF	Verified	Mitochondrial thioredoxin; highly conserved oxidoreductase required to maintain the redox homeostasis of the cell, forms the mitochondrial thioredoxin system with Trr2p, redox state is maintained by both Trr2p and Glr1p
YCR084C	0.3275	0.4595	1.1915	0.659	0.465429	1.07172	0.031739	47767.4	YCR084C	TUP1	chromatin-silencing transcriptional regulator TUP1|UMR7|SFL2|ROX4|FLK1|CYC9|CRT4|AMM1|AER2|AAR1	ORF	Verified	General repressor of transcription; forms complex with Cyc8p, involved in the establishment of repressive chromatin structure through interactions with histones H3 and H4, appears to enhance expression of some genes
YCR085W	0	0	0.467	0.467	0.269623	1.2363	0.496552	531.389	YCR085W	YCR085W		ORF	Uncharacterized	Putative protein of unknown function; conserved among S. cerevisiae strains; YCR085W is not an essential gene
YCR086W	1.4545	0.656	0.6965	0.936	0.449779	0.51339	0.010359	8733.35	YCR086W	CSM1		ORF	Verified	Nucleolar protein that mediates homolog segregation during meiosis I; forms a complex with Lrs4p and then Mam1p at kinetochores; required for condensin recruitment to the replication fork barrier site and rDNA repeat segregation
YCR087C-A	0.04	-0.85	-0.728	-0.513	0.482495	1.8334	0.07588	8258.29	YCR087C-A	YCR087C-A	LUG1	ORF	Uncharacterized	Putative protein of unknown function; green fluorescent protein (GFP)-fusion protein localizes to the nucleolus; YCR087C-A is not an essential gene
YCR087W	0	0.676	0.2515	0.393	0.34167	2.21218	0.278905	330.022	YCR087W	YCR087W		ORF	Dubious	Dubious open reading frame; unlikely to encode a functional protein, based on available experimental and comparative sequence data; partially overlaps uncharacterized gene YCR087C-A; YCR087W is not an essential gene
YCR088W	0.427	0.384	0.6775	0.496	0.158504	0.644284	0.003645	23423.5	YCR088W	ABP1		ORF	Verified	Actin-binding protein of the cortical actin cytoskeleton; important for activation of the Arp2/3 complex that plays a key role actin in cytoskeleton organization; inhibits barbed-end actin filament elongation; phosphorylation within its Proline-Rich Regio, mediated by Cdc28p and Pho85p, protects Abp1p from proteolysis mediated by its own PEST sequences; mammalian homolog of HIP-55 (hematopoietic …
YCR089W	-0.133	-0.6415	-0.163	-0.313	0.285317	2.91232	0.112635	5861.94	YCR089W	FIG2		ORF	Verified	Cell wall adhesin, expressed specifically during mating; may be involved in maintenance of cell wall integrity during mating; FIG2 has a paralog, AGA1, that arose from the whole genome duplication
YCR090C	0.413	0.0055	-0.388	0.01	0.40052	4005.2	0.982101	2890.35	YCR090C	YCR090C		ORF	Uncharacterized	Putative protein of unknown function; green fluorescent protein (GFP)-fusion protein localizes to the cytoplasm and nucleus; YCR090C is not an essential gene
YCR091W	-0.161	0.506	0.35	0.232	0.34889	6.48206	0.287459	22158.2	YCR091W	KIN82	putative serine/threonine protein kinase KIN82|FPK2	ORF	Verified	Putative serine/threonine protein kinase; implicated in the regulation of phospholipid asymmetry through the activation of phospholipid translocases (flippases); involved in the phosphorylation of upstream inhibitory kinase Ypk1p along with Fpk1p; has a redundant role in the cellular response to mating pheromone; KIN82 has a paralog, FPK1, that arose from the whole genome duplication
YCR092C	0.657	0.334	0.6605	0.551	0.187503	0.617596	0.004073	1190.81	YCR092C	MSH3	mismatch repair protein MSH3	ORF	Verified	Mismatch repair protein; forms dimers with Msh2p that mediate repair of insertion or deletion mutations and removal of nonhomologous DNA ends, contains a PCNA (Pol30p) binding motif required for genome stability
YCR093W	-1.0105	-0.409	-0.4035	-0.608	0.348875	0.943762	0.025728	2100.9	YCR093W	CDC39	CCR4-NOT core subunit CDC39|SMD6|ROS1|NOT1	ORF	Verified	Subunit of the CCR4-NOT1 core complex; this complex has multiple roles in the regulation of mRNA levels including regulation of transcription and destabilization of mRNA by deadenylation; basal transcription factor that increases initiation and elongation; activates the ATPase activity of Dhh1p, resulting in processing body disassembly
YCR094W	0.204	0.112	0.332	0.216	0.11049	2.36818	0.017263	6321.85	YCR094W	CDC50	aminophospholipid translocase regulatory protein CDC50	ORF	Verified	Endosomal protein that interacts with phospholipid flippase Drs2p; interaction with Cdc50p is essential for Drs2p catalytic activity; mutations affect cell polarity and polarized growth; similar to Lem3p; CDC50 has a paralog, YNR048W, that arose from the whole genome duplication
YCR095C	0.4425	0.3415	0.3395	0.374	0.0588982	0.421075	0.000935	10586.8	YCR095C	OCA4		ORF	Uncharacterized	Cytoplasmic protein required for replication of Brome mosaic virus; S. cerevisiae is a model system for studying replication of positive-strand RNA viruses in their natural hosts
YCR096C	0.7415	0.146	0.2225	0.37	0.323994	2.36665	0.083698	67033.5	YCR096C	HMRA2	homeodomain mating type protein a2|A2	ORF	Verified|silenced_gene	Silenced copy of a2 at HMR; similarity to Alpha2p; required along with a1p for inhibiting expression of the HO endonuclease in a/alpha HO/HO diploid cells with an active mating-type interconversion system
YCR097W	2.343	0	1.762	2.053	1.2201	0.289479	0.276908	704.225	YCR097W	HMRA1	YCR097WB	ORF	Verified|silenced_gene	Silenced copy of a1 at HMR; homeobox corepressor that interacts with Alpha2p to repress haploid-specific gene transcription in diploid cells
YCR097W-A	0.407	-0.2175	-0.311	-0.041	0.390356	232.216	0.856992	9021.62	YCR097W-A	YCR097W-A		ORF	Dubious	Dubious open reading frame; unlikely to encode a functional protein, based on available experimental and comparative sequence data; identified by homology to a hemiascomycetous yeast protein
YCR098C	0.0155	0.661	0.165	0.28	0.337895	4.30988	0.173069	593.676	YCR098C	GIT1		ORF	Verified	Plasma membrane permease; mediates uptake of glycerophosphoinositol and glycerophosphocholine as sources of the nutrients inositol and phosphate; expression and transport rate are regulated by phosphate and inositol availability
YCR099C	-0.5305	-0.6595	-0.4045	-0.531	0.127503	0.452201	0.01241	1404.87	YCR099C	YCR099C		ORF	Uncharacterized	Putative protein of unknown function
YCR100C	-1.648	-0.4985	-0.218	-0.788	0.75773	1.22029	0.077304	2257.49	YCR100C	YCR100C		ORF	Uncharacterized	Putative protein of unknown function
YCR101C	-1.071	-0.465	-0.249	-0.595	0.426141	1.2037	0.038983	1007.34	YCR101C	YCR101C		ORF	Uncharacterized	Putative protein of unknown function; localizes to the membrane fraction; YCR101C is not an essential gene
YCR102C	-0.2365	0.857	0.495	0.372	0.557058	4.02545	0.203288	643.574	YCR102C	YCR102C		ORF	Uncharacterized	Putative protein of unknown function; involved in copper metabolism; similar to C. carbonum toxD gene; member of the quinone oxidoreductase family
YCR102W-A	0	0	1.49	1.49	0.860252	0.387483	0.011812	387.15	YCR102W-A	YCR102W-A		ORF	Dubious	Dubious open reading frame; unlikely to encode a functional protein, based on available experimental and comparative sequence data
YCR104W	-0.1155	-0.0935	-0.105	-0.105	0.0110038	0.998076	0.013177	29736.7	YCR104W	PAU3	seripauperin PAU3	ORF	Verified	Member of the seripauperin multigene family; encoded mainly in subtelomeric region; active during alcoholic fermentation; regulated by anaerobiosis; negatively regulated by oxygen; repressed by heme
YCR105W	0.147	-0.136	0.196	0.054	0.179218	61.4601	0.903039	347.381	YCR105W	ADH7	NADP-dependent alcohol dehydrogenase|ADHVII	ORF	Verified	NADPH-dependent medium chain alcohol dehydrogenase; has broad substrate specificity; member of the cinnamyl family of alcohol dehydrogenases; may be involved in fusel alcohol synthesis or in aldehyde tolerance
YCR106W	-0.78	-0.334	-0.455	-0.523	0.230645	0.843219	0.011921	1115.85	YCR106W	RDS1		ORF	Verified	Putative zinc cluster transcription factor; involved in conferring resistance to cycloheximide
YCR107W	-1.861	-0.9375	-0.2945	-1.031	0.787424	0.740784	0.047989	755.182	YCR107W	AAD3	putative aryl-alcohol dehydrogenase	ORF	Verified	Putative aryl-alcohol dehydrogenase; similar to P. chrysosporium aryl-alcohol dehydrogenase; mutational analysis has not yet revealed a physiological role; AAD3 has a paralog, AAD15, that arose from a segmental duplication; members of the AAD gene family comprise three pairs (AAD3 + AAD15, AAD6/AAD16 + AAD4, AAD10 + AAD14) whose two genes are more related to one another than to other members of t…
YDL001W	0.342	0.142	0.2535	0.246	0.10022	1.65609	0.01055	3968.34	YDL001W	RMD1		ORF	Verified	Cytoplasmic protein required for sporulation
YDL002C	0.3405	0.525	0.1075	0.324	0.209219	1.99302	0.024734	3894.75	YDL002C	NHP10	HMO2	ORF	Verified	Non-essential INO80 chromatin remodeling complex subunit; preferentially binds DNA ends, protecting them from exonucleatic cleavage; deletion affects telomere maintenance via recombination; related to mammalian high mobility group proteins
YDL003W	1.6265	1.11	1.3155	1.351	0.26004	0.142472	0.000838	3251.46	YDL003W	MCD1	kleisin alpha|SCC1|RHC21|PDS3	ORF	Verified	Essential alpha-kleisin subunit of the cohesin complex; required for sister chromatid cohesion in mitosis and meiosis; apoptosis induces cleavage and translocation of a C-terminal fragment to mitochondria; expression peaks in S phase
YDL004W	-0.0285	-0.381	-0.744	-0.384	0.357763	2.42623	0.071832	28493.1	YDL004W	ATP16	F1F0 ATP synthase subunit delta	ORF	Verified	Delta subunit of the central stalk of mitochondrial F1F0 ATP synthase; F1F0 ATP synthase is a large, evolutionarily conserved enzyme complex required for ATP synthesis; F1 translationally regulates ATP6 and ATP8 expression to achieve a balanced output of ATP synthase genes encoded in nucleus and mitochondria; phosphorylated
YDL005C	0.213	-0.0105	0.142	0.115	0.1142	8.63514	0.120151	9673.03	YDL005C	MED2		ORF	Verified	Subunit of the RNA polymerase II mediator complex; associates with core polymerase subunits to form the RNA polymerase II holoenzyme; essential for transcriptional regulation; relocalizes to the cytosol in response to hypoxia
YDL006W	-0.0935	-0.227	-0.4105	-0.244	0.159156	2.67327	0.076668	5299.02	YDL006W	PTC1	type 2C protein phosphatase PTC1|TPD1|KCS2|CWH47	ORF	Verified	Type 2C protein phosphatase (PP2C); dephosphorylates Hog1p, inactivating osmosensing MAPK cascade; involved in Fus3p activation during pheromone response; deletion affects precursor tRNA splicing, mitochondrial inheritance, and sporulation
YDL007W	0.001	0.7075	0.7345	0.481	0.415911	1.79767	0.068543	22623.1	YDL007W	RPT2	proteasome regulatory particle base subunit RPT2|YTA5|YHS4	ORF	Verified	ATPase of the 19S regulatory particle of the 26S proteasome; one of six ATPases of the regulatory particle; involved in the degradation of ubiquitinated substrates; required for normal peptide hydrolysis by the core 20S particle; N-myristoylation of Rpt2p at Gly2 is involved in regulating the proper intracellular distribution of proteasome activity by controlling the nuclear localization of the 2…
YDL008W	0.7335	0.591	0.2095	0.511	0.270932	1.03757	0.015004	2241.46	YDL008W	APC11	anaphase promoting complex subunit 11	ORF	Verified	Catalytic core subunit, Anaphase-Promoting Complex/Cyclosome (APC/C); which is a ubiquitin-protein ligase required for degradation of anaphase inhibitors, including mitotic cyclins, during the metaphase/anaphase transition; contains a RING-H2 domain that is required for activity
YDL009C	0	0	0	0	0	0	1	301.063	YDL009C	YDL009C		ORF	Uncharacterized	Protein of unknown function; mRNA identified as translated by ribosome profiling data; SWAT-GFP and mCherry fusion proteins localize to the cytosol; partially overlaps the verified ORF YDL010W; YDL009C is not an essential gene
YDL010W	0.8055	0.536	0.349	0.564	0.229489	0.721446	0.008654	15986	YDL010W	GRX6	glutathione-disulfide reductase GRX6	ORF	Verified	Cis-golgi localized monothiol glutaredoxin, binds Fe-S cluster; more similar in activity to dithiol than other monothiol glutaredoxins; involved in the oxidative stress response; GRX6 has a paralog, GRX7, that arose from the whole genome duplication
YDL011C	0.6265	0.4645	0.8655	0.652	0.201728	0.474539	0.159305	257.881	YDL011C	YDL011C		ORF	Dubious	Dubious open reading frame; unlikely to encode a functional protein, based on available experimental and comparative sequence data; overlaps the uncharacterized ORF YDL010W
YDL012C	0.3355	-0.309	-0.1825	-0.052	0.341493	126.292	0.789284	30199.1	YDL012C	YDL012C		ORF	Verified	Tail-anchored plasma membrane protein with a conserved CYSTM module; possibly involved in response to stress; may contribute to non-homologous end-joining (NHEJ) based on ydl012c htz1 double null phenotype; YDL012C has a paralog, YBR016W, that arose from the whole genome duplication
YDL013W	-0.3325	-0.102	0.0125	-0.14	0.17572	8.96532	0.156896	35496.2	YDL013W	SLX5	SUMO-targeted ubiquitin ligase complex subunit SLX5|ULS2|HEX3	ORF	Verified	Subunit of the Slx5-Slx8 SUMO-targeted Ub ligase (STUbL) complex; role in Ub-mediated degradation of histone variant Cse4p preventing mislocalization to euchromatin; role in proteolysis of spindle positioning protein Kar9p, and DNA repair proteins Rad52p and Rad57p; forms SUMO-dependent nuclear foci, including DNA repair centers; contains a RING domain and two SIM motifs; associates with the cent…
YDL014W	0.214	-0.3635	0.406	0.086	0.400521	54.1537	0.681162	8640.6	YDL014W	NOP1	rRNA methyltransferase NOP1|LOT3	ORF	Verified	Histone glutamine methyltransferase, modifies H2A at Q105 in nucleolus; component of the small subunit processome complex, which is required for processing of pre-18S rRNA; ortholog of mammalian fibrillarin; inviability of the null mutant is functionally complemented by human FBL
YDL015C	-0.6245	-0.3605	-0.7825	-0.589	0.213207	0.61457	0.011706	23238	YDL015C	TSC13	trans-2-enoyl-CoA reductase (NADPH) TSC13	ORF	Verified	Enoyl reductase; catalyzes last step in each cycle of very long chain fatty acid elongation; localizes to ER, highly enriched in a structure marking nuclear-vacuolar junctions; coimmunoprecipitates with elongases Elo2p and Elo3p; protein increases in abundance and relative distribution to ER foci increases upon DNA replication stress; human homolog TECR implicated in nonsyndromic mental retardati…
YDL016C	0	0	1.51	1.51	0.871799	0.382351	1	397.833	YDL016C	YDL016C		ORF	Dubious	Dubious open reading frame; unlikely to encode a functional protein, based on available experimental and comparative sequence data; partially overlaps the verified ORF CDC7/YDL153C, the catalytic subunit of a complex that regulates DNA replication
YDL017W	-0.056	-0.231	0.054	-0.078	0.14373	23.6243	0.353022	2432.81	YDL017W	CDC7	serine/threonine protein kinase CDC7|SAS1|LSD6	ORF	Verified	DDK (Dbf4-dependent kinase) catalytic subunit; required for origin firing and replication fork progression in mitotic S phase through phosphorylation of Mcm2-7p complexes and Cdc45p; kinase activity correlates with cyclical DBF4 expression; required for pre-meiotic DNA replication, meiotic DSB formation, recruitment of monopolin complex to kinetochores during meiosis I, regulation of meiosis-spec…
YDL018C	1.076	0.923	0.334	0.777	0.391768	0.648914	0.013289	5344.07	YDL018C	ERP3		ORF	Verified	Protein with similarity to Emp24p and Erv25p; member of the p24 family involved in ER to Golgi transport
YDL019C	-0.352	-0.089	-0.2125	-0.218	0.131581	2.76873	0.037865	6628.59	YDL019C	OSH2	oxysterol-binding protein related protein OSH2	ORF	Verified	Member of an oxysterol-binding protein family with seven members; in S. cerevisiae, family members have overlapping, redundant functions in sterol metabolism and collectively perform a function essential for viability; contains FFAT motif; interacts with ER anchor Scs2p at patches at the plasma membrane and at the nuclear envelope; regulated by sterol binding; OSH2 has a paralog, SWH1, that arose…
YDL020C	0.3085	0.124	-0.0785	0.118	0.19357	13.9019	0.285851	11708	YDL020C	RPN4	stress-regulated transcription factor RPN4|UFD5|SON1	ORF	Verified	Transcription factor that stimulates expression of proteasome genes; Rpn4p levels are in turn regulated by the 26S proteasome in a negative feedback control mechanism; RPN4 is transcriptionally regulated by various stress responses; relative distribution to the nucleus increases upon DNA replication stress
YDL021W	0.0885	-0.037	-0.265	-0.071	0.17921	35.5504	0.446299	10508.4	YDL021W	GPM2	phosphoglycerate mutase family protein GPM2	ORF	Verified	Homolog of Gpm1p phosphoglycerate mutase; converts 3-phosphoglycerate to 2-phosphoglycerate in glycolysis; may be non-functional; GPM2 has a paralog, GPM3, that arose from the whole genome duplication
YDL022W	-1.5425	-1.3995	-1.255	-1.399	0.143751	0.0734471	0.000324	39882	YDL022W	GPD1	glycerol-3-phosphate dehydrogenase (NAD(+)) GPD1|OSR5|OSG1|HOR1|DAR1	ORF	Verified	NAD-dependent glycerol-3-phosphate dehydrogenase; key enzyme of glycerol synthesis, essential for growth under osmotic stress; expression regulated by high-osmolarity glycerol response pathway; protein abundance increases in response to DNA replication stress; constitutively inactivated via phosphorylation by the protein kinases Ypk1p and Ypk2p, dephosphorylation increases catalytic activity; for…
YDL023C	-0.6325	-0.9535	-0.4305	-0.672	0.263747	0.584048	0.012055	679.324	YDL023C	YDL023C	SRF4	ORF	Dubious	Dubious open reading frame; unlikely to encode a functional protein, based on available experimental and comparative sequence data; not conserved in other Saccharomyces species; overlaps the verified gene GPD1; deletion confers sensitivity to GSAO; deletion in cyr1 mutant results in loss of stress resistance
YDL024C	-1.781	-0.355	-0.5375	-0.891	0.776002	0.977479	0.057516	4905.37	YDL024C	DIA3	putative acid phosphatase DIA3	ORF	Verified	Protein of unknown function; involved in invasive and pseudohyphal growth
YDL025C	0.023	-0.2315	-0.028	-0.079	0.13465	21.575	0.601992	44199	YDL025C	RTK1	putative serine/threonine protein kinase RTK1	ORF	Verified	Putative protein kinase, potentially phosphorylated by Cdc28p; interacts with ribosome biogenesis factors, Cka2, Gus1 and Arc1; protein abundance increases in response to DNA replication stress
YDL026W	0.9665	0.2335	0.087	0.429	0.471217	2.56039	0.154513	385.547	YDL026W	YDL026W		ORF	Dubious	Dubious open reading frame; unlikely to encode a functional protein, based on available experimental and comparative sequence data
YDL027C	-0.52	-0.0285	-0.563	-0.37	0.29696	2.16917	0.046674	7629.46	YDL027C	MRX9		ORF	Uncharacterized	Protein that associates with mitochondrial ribosome; the authentic, non-tagged protein is detected in highly purified mitochondria in high-throughput studies; YDL027C is not an essential gene
YDL028C	0.4815	0.373	0.2345	0.363	0.123803	0.939548	0.004107	9085.85	YDL028C	MPS1	serine/threonine/tyrosine protein kinase MPS1|PAC8|RPK1	ORF	Verified	Dual-specificity kinase; autophosphorylation required for function; required for spindle pole body (SPB) duplication and spindle checkpoint function; contributes to bi-orientation by promoting formation of force-generating kinetochore-microtubule attachments in meiosis I; substrates include SPB proteins Spc42p, Spc110p, and Spc98p, mitotic exit network protein Mob1p, kinetochore protein Cnn1p, an…
YDL029W	0.5475	0.391	0.0845	0.341	0.235515	2.02539	0.052169	3815.68	YDL029W	ARP2	actin-related protein 2|ACT2	ORF	Verified	Essential component of the Arp2/3 complex; Arp2/3 is a highly conserved actin nucleation center required for the motility and integrity of actin patches; involved in endocytosis and membrane growth and polarity; required for efficient Golgi-to-ER trafficking in COPI mutants
YDL030W	0.2135	0.606	0.7815	0.534	0.290827	1.01989	0.014888	12374.2	YDL030W	PRP9	SF3a splicing factor complex subunit PRP9	ORF	Verified	Subunit of the SF3a splicing factor complex; required for spliceosome assembly; acts after the formation of the U1 snRNP-pre-mRNA complex
YDL031W	-0.5355	-0.851	-0.534	-0.64	0.182589	0.445773	0.002996	2801.03	YDL031W	DBP10	putative ATP-dependent RNA helicase DBP10	ORF	Verified	Putative ATP-dependent RNA helicase of the DEAD-box protein family; constituent of 66S pre-ribosomal particles; essential protein involved in ribosome biogenesis
YDL032W	-0.473	-0.0475	0.0485	-0.157	0.277557	11.2604	0.54632	318.889	YDL032W	YDL032W		ORF	Dubious	Dubious open reading frame; unlikely to encode a functional protein, based on available experimental and comparative sequence data; partially overlaps verified gene SLM3/YDL033C; YDL032W is not an essential gene
YDL033C	-0.3175	0.2895	0.4875	0.153	0.41946	17.9187	0.471642	7582.79	YDL033C	SLM3	tRNA-5-taurinomethyluridine 2-sulfurtransferase|MTU1|MTO2	ORF	Verified	tRNA-specific 2-thiouridylase; responsible for 2-thiolation of the wobble base of mitochondrial tRNAs; human homolog TRMU is implicated in myoclonus epilepsy associated with ragged red fibers (MERRF), and can complement yeast null mutant
YDL034W	0.378	0	-0.436	-0.165	0.407344	14.9621	0.744279	343.824	YDL034W	YDL034W		ORF	Dubious	Dubious open reading frame; unlikely to encode a functional protein, based on available experimental and comparative sequence data; partially overlaps with verified gene GPR1/YDL035C; YDL034W is not an essential gene
YDL035C	-0.2455	-0.243	-0.3845	-0.291	0.080983	0.95633	0.007097	4723.38	YDL035C	GPR1		ORF	Verified	Plasma membrane G protein coupled receptor (GPCR); interacts with the heterotrimeric G protein alpha subunit, Gpa2p, and with Plc1p; sensor that integrates nutritional signals with the modulation of cell fate via PKA and cAMP synthesis
YDL036C	-0.228	-0.2985	-0.1535	-0.226	0.0725092	1.41963	0.006841	7187.37	YDL036C	PUS9	pseudouridine synthase PUS9	ORF	Verified	Mitochondrial tRNA:pseudouridine synthase; catalyzes the formation of pseudouridine at position 32 in mitochondrial tRNAs; contains an N-terminal mitochondrial targeting sequence; PUS9 has a paralog, RIB2, that arose from the whole genome duplication
YDL037C	0	0	0.029	0.029	0.0167432	19.9086	0.991259	342.227	YDL037C	BSC1		ORF	Verified	Protein of unconfirmed function; similar to cell surface flocculin Flo11p; ORF exhibits genomic organization compatible with a translational readthrough-dependent mode of expression; in W303 strain one continuous open reading frame comprising of YDL037C, the intergenic region and YDL039C encodes the gene IMI1
YDL038C	0.7725	0.3725	-0.092	0.351	0.432651	3.51175	0.144806	1051.53	YDL039C	PRM7	pheromone-regulated protein PRM7|YDL038C	ORF	Verified	Pheromone-regulated protein; predicted to have one transmembrane segment; promoter contains Gcn4p binding elements; in W303 strain one continuous open reading frame comprising of YDL037C, the intergenic region and YDL039C encodes the IMI1
YDL039C	0.741	0.0455	0.0645	0.284	0.396176	4.91192	0.190746	1418.6	YDL039C	PRM7	probe close to 3' with higher signal; pheromone-regulated protein PRM7|YDL038C	ORF	Verified	Pheromone-regulated protein; predicted to have one transmembrane segment; promoter contains Gcn4p binding elements; in W303 strain one continuous open reading frame comprising of YDL037C, the intergenic region and YDL039C encodes the IMI1
YDL040C	-0.565	-0.2985	-0.396	-0.42	0.134839	0.764394	0.00631	9647.4	YDL040C	NAT1	peptide alpha-N-acetyltransferase complex A subunit NAT1|NAA15|AAA1	ORF	Verified	Subunit of protein N-terminal acetyltransferase NatA; NatA comprised of Nat1p, Ard1p, and Nat5p; N-terminally acetylates many proteins to influence multiple processes such as cell cycle progression, heat-shock resistance, mating, sporulation, telomeric silencing and early stages of mitophagy; orthologous to human NAA15; expression of both human NAA10 and NAA15 functionally complements ard1 nat1 d…
YDL041W	0	0	0.9565	0.957	0.552236	0.602977	0.374507	351.567	YDL041W	YDL041W		ORF	Dubious	Dubious open reading frame; unlikely to encode a functional protein, based on available experimental and comparative sequence data; overlaps the verified gene SIR2/YDL042C
YDL042C	-0.5655	-0.5495	-0.347	-0.487	0.121795	0.513538	0.013758	624.353	YDL042C	SIR2	NAD-dependent histone deacetylase SIR2|MAR1	ORF	Verified	Conserved NAD+ dependent histone deacetylase of the Sirtuin family; deacetylation targets are primarily nuclear proteins; required for telomere hypercluster formation in quiescent yeast cells; involved in regulation of lifespan; plays roles in silencing at HML, HMR, telomeres, and rDNA; negatively regulates initiation of DNA replication; functions as regulator of autophagy like mammalian homolog …
YDL043C	-0.299	-0.5645	-0.4135	-0.426	0.133168	0.733802	0.047135	579.162	YDL043C	PRP11	RNA11	ORF	Verified	Subunit of the SF3a splicing factor complex; required for spliceosome assembly
YDL044C	0.609	0.7905	0.5595	0.653	0.121623	0.285227	0.000917	2424.62	YDL044C	MTF2	NAM1	ORF	Verified	Mitochondrial protein that interacts with mitochondrial RNA polymerase; interacts with an N-terminal region of mitochondrial RNA polymerase (Rpo41p) and couples RNA processing and translation to transcription
YDL045C	0.556	0.5125	0.237	0.435	0.17299	0.914203	0.008701	17987.3	YDL045C	FAD1	FMN adenylyltransferase	ORF	Verified	Flavin adenine dinucleotide (FAD) synthetase; performs the second step in synthesis of FAD from riboflavin; mutation is functionally complemented by human FLAD1
YDL045W-A	0.5115	0.244	-0.2395	0.172	0.380642	12.8665	0.445245	1071.57	YDL045W-A	MRP10	mitochondrial 37S ribosomal protein YmS-T|YmS-T	ORF	Verified	Mitochondrial ribosomal protein of the small subunit; contains twin cysteine-x9-cysteine motifs; oxidized by Mia40p during import into mitochondria
YDL046W	0.024	0.692	0.4115	0.376	0.335425	2.37258	0.062024	26735	YDL046W	NPC2	sterol transporter	ORF	Verified	Sterol transport protein and functional homolog of human NPC2/He1; human NPC2 is a cholesterol-binding protein whose deficiency causes Niemann-Pick type C2 disease involving retention of cholesterol in lysosomes; yeast NPC2 can complement mutations in human NPC2
YDL047W	-0.9505	-0.207	-0.0065	-0.388	0.497348	3.30367	0.14986	23699.8	YDL047W	SIT4	type 2A-related serine/threonine-protein phosphatase SIT4|PPH1	ORF	Verified	Ceramide-activated, type 2A-related serine-threonine phosphatase; functions in G1/S transition of mitotic cycle; controls lifespan, mitochondrial function, cell cycle progression by regulating HXK2 phosphorylation; regulator of COPII coat dephosphorylation; required for ER to Golgi traffic; interacts with Hrr25p kinase; cytoplasmic and nuclear protein that modulates functions mediated by Pkc1p in…
YDL048C	1.351	1.4115	1.103	1.289	0.163471	0.0983863	0.000347	55387	YDL048C	STP4		ORF	Verified	Protein containing a Kruppel-type zinc-finger domain; similar to Stp1p, Stp2p; predicted transcription factor; relative distribution to the nucleus increases upon DNA replication stress; STP4 has a paralog, STP3, that arose from the whole genome duplication
YDL049C	0.0445	0.267	-0.1635	0.049	0.215291	89.6671	0.707841	30724.7	YDL049C	KNH1		ORF	Verified	Protein with similarity to Kre9p; Kre9p is involved in cell wall beta 1,6-glucan synthesis; overproduction suppresses growth defects of a kre9 null mutant; required for propionic acid resistance
YDL050C	0.5715	0.1425	0.1835	0.299	0.236737	2.64803	0.414195	280.115	YDL050C	YDL050C		ORF	Dubious	Dubious open reading frame; unlikely to encode a functional protein, based on available experimental and comparative sequence data
YDL051W	0.105	-0.124	-0.2025	-0.074	0.15977	29.1765	0.600283	3106.63	YDL051W	LHP1	YLA1|LAH1	ORF	Verified	RNA binding protein required for maturation of tRNA and U6 snRNA; acts as a molecular chaperone for RNAs transcribed by polymerase III; homologous to human La (SS-B) autoantigen
YDL052C	0.7485	0.199	0.2135	0.387	0.313152	2.0909	0.048581	10856.4	YDL052C	SLC1	1-acylglycerol-3-phosphate O-acyltransferase SLC1	ORF	Verified	1-acyl-sn-glycerol-3-phosphate acyltransferase; catalyzes the acylation of lysophosphatidic acid to form phosphatidic acid, a key intermediate in lipid metabolism; enzymatic activity detected in lipid particles and microsomes
YDL053C	0.5745	0.035	-0.0435	0.188	0.336439	9.51898	0.274774	5564.46	YDL053C	PBP4		ORF	Verified	Pbp1p binding protein; interacts strongly with Pab1p-binding protein 1 (Pbp1p) in the yeast two-hybrid system; also interacts with Lsm12p in a copurification assay; relative distribution to the nucleus increases upon DNA replication stress
YDL054C	-0.3805	-0.676	-0.557	-0.538	0.148679	0.513673	0.002963	32831.1	YDL054C	MCH1		ORF	Verified	Protein with similarity to mammalian monocarboxylate permeases; monocarboxylate permeases are involved in transport of monocarboxylic acids across the plasma membrane but mutant is not deficient in monocarboxylate transport
YDL055C	0.125	-0.3245	-0.7305	-0.31	0.427934	4.45301	0.25359	53080.3	YDL055C	PSA1	mannose-1-phosphate guanylyltransferase|SRB1|VIG9|MPG1	ORF	Verified	GDP-mannose pyrophosphorylase (mannose-1-phosphate guanyltransferase); synthesizes GDP-mannose from GTP and mannose-1-phosphate in cell wall biosynthesis; required for normal cell wall structure
YDL056W	0.0135	-0.1645	-0.2245	-0.125	0.123779	7.92188	0.097857	5366.78	YDL056W	MBP1	transcription factor MBP1	ORF	Verified	Transcription factor; involved in regulation of cell cycle progression from G1 to S phase, forms a complex with Swi6p that binds to MluI cell cycle box regulatory element in promoters of DNA synthesis genes
YDL057W	0.7495	0.3615	0.5335	0.548	0.194415	0.647395	0.004053	5692.4	YDL057W	YDL057W		ORF	Uncharacterized	Putative protein of unknown function; YDL057W is not an essential gene
YDL058W	0.047	-0.1175	0.043	-0.009	0.0938407	1158.53	0.959675	38421.8	YDL058W	USO1	INT1	ORF	Verified	Essential protein involved in vesicle-mediated ER to Golgi transport; binds membranes and functions during vesicle docking to the Golgi; required for assembly of the ER-to-Golgi SNARE complex
YDL059C	0.8395	0.306	0.3825	0.509	0.28848	1.11347	0.020743	13337.4	YDL059C	RAD59		ORF	Verified	Protein involved DNA double-strand break repair; repairs breaks in DNA during vegetative growth via recombination and single-strand annealing; anneals complementary single-stranded DNA; forms nuclear foci upon DNA replication stress; required for loading of Rad52p to DSBs; regulates replication fork progression in DNA ligase I-deficient cells; paralog of Rad52p
YDL060W	0.062	-0.2385	-0.084	-0.087	0.15027	19.8534	0.259179	11496.8	YDL060W	TSR1		ORF	Verified	Protein required for processing of 20S pre-rRNA in the cytoplasm; associates with pre-40S ribosomal particles; inhibits the premature association of 60S subunits with assembling 40S subunits in the cytoplasm; similar to Bms1p; relocalizes from nucleus to cytoplasm upon DNA replication stress
YDL061C	0.134	-0.7545	-1.093	-0.571	0.633712	1.94366	0.105697	29030.8	YDL061C	RPS29B	uS14|ribosomal 40S subunit protein S29B|S14|YS29|S36B|S29B|YS29B	ORF	Verified	Protein component of the small (40S) ribosomal subunit; homologous to mammalian ribosomal protein S29 and bacterial S14; RPS29B has a paralog, RPS29A, that arose from the whole genome duplication
YDL062W	0	0	0.005	0.005	0.00288675	115.47	1	364.154	YDL062W	YDL062W		ORF	Dubious	Dubious open reading frame; unlikely to encode a functional protein, based on available experimental and comparative sequence data; partially overlaps uncharacterized ORF YDL063C; YDL062W is not essential
YDL063C	0.4405	-0.1525	-0.1055	0.061	0.32964	88.589	0.75018	6141.88	YDL063C	SYO1		ORF	Verified	Transport adaptor or symportin; facilitates synchronized nuclear coimport of the two 5S-rRNA binding proteins Rpl5p and Rpl11p; binds to nascent Rpl5p during translation; required for biogenesis of the large ribosomal subunit; green fluorescent protein (GFP)-fusion protein localizes to the cytoplasm and nucleus
YDL064W	0.3805	0.229	0.0675	0.226	0.156527	3.06458	0.100774	10488.6	YDL064W	UBC9	E2 SUMO-conjugating protein UBC9	ORF	Verified	SUMO-conjugating enzyme involved in the Smt3p conjugation pathway; nuclear protein required for S- and M-phase cyclin degradation and mitotic control; involved in proteolysis mediated by the anaphase-promoting complex cyclosome (APCC)
YDL065C	0.986	0.322	0.4485	0.585	0.352563	1.03021	0.019792	6434.66	YDL065C	PEX19	PAS12	ORF	Verified	Chaperone and import receptor for newly-synthesized class I PMPs; binds peroxisomal membrane proteins (PMPs) in the cytoplasm and delivers them to the peroxisome for subsequent insertion into the peroxisomal membrane; interacts with Myo2p and contributes to peroxisome partitioning
YDL066W	-2.124	-0.669	-0.7745	-1.189	0.811306	0.57388	0.029131	40990.6	YDL066W	IDP1	isocitrate dehydrogenase (NADP(+)) IDP1	ORF	Verified	Mitochondrial NADP-specific isocitrate dehydrogenase; catalyzes the oxidation of isocitrate to alpha-ketoglutarate; not required for mitochondrial respiration and may function to divert alpha-ketoglutarate to biosynthetic processes
YDL067C	-0.173	-0.005	-0.2525	-0.144	0.12636	6.09373	0.084227	35248.4	YDL067C	COX9	cytochrome c oxidase subunit VIIa	ORF	Verified	Subunit VIIa of cytochrome c oxidase (Complex IV); Complex IV is the terminal member of the mitochondrial inner membrane electron transport chain
YDL068W	0.884	0.37	0.333	0.48	0.307995	1.33678	0.113232	429.621	YDL068W	YDL068W		ORF	Dubious	Dubious open reading frame; unlikely to encode a functional protein, based on available experimental and comparative sequence data
YDL069C	0.213	-0.5935	-0.638	-0.34	0.478996	4.14356	0.193161	3658.46	YDL069C	CBS1		ORF	Verified	Mitochondrial translational activator of the COB mRNA; membrane protein that interacts with translating ribosomes, acts on the COB mRNA 5'-untranslated leader
YDL070W	0.25	0.181	0.163	0.198	0.0459239	1.17141	0.0642	2163.06	YDL070W	BDF2		ORF	Verified	Protein involved in transcription initiation; acts at TATA-containing promoters; associates with the basal transcription factor TFIID; contains two bromodomains; corresponds to the C-terminal region of mammalian TAF1; redundant with Bdf1p; protein abundance increases in response to DNA replication stress; BDF2 has a paralog, BDF1, that arose from the whole genome duplication
YDL071C	1.051	1.4885	0.465	1.002	0.513542	0.511494	0.018704	370.394	YDL071C	YDL071C	IRC1	ORF	Dubious	Dubious open reading frame; unlikely to encode a functional protein, based on available experimental and comparative sequence data; partially overlaps the verified ORF BDF2/YDL070W
YDL072C	-0.449	-0.533	-0.9765	-0.653	0.283433	0.664697	0.008701	16078.8	YDL072C	YET3		ORF	Verified	Protein of unknown function; YET3 null mutant decreases the level of secreted invertase; homolog of human BAP31 protein; protein abundance increases in response to DNA replication stress
YDL073W	-0.3725	-0.3245	-0.228	-0.308	0.073594	0.775785	0.001971	3711.32	YDL073W	AHK1		ORF	Verified	Scaffold protein in the HKR1 sub-branch of the Hog1p-signaling pathway; physically interacts with the cytoplasmic domain of Hkr1p, and with Sho1p, Pbs2p, and Ste11p; prevents cross-talk signaling from Hkr1p of the osmotic stress MAPK cascade to the Kss1p MAPK cascade; non-essential gene
YDL074C	0.041	0.303	0.4765	0.273	0.219244	2.94172	0.054177	14350.5	YDL074C	BRE1	E3 ubiquitin-protein ligase BRE1	ORF	Verified	E3 ubiquitin ligase; forms heterodimer with Rad6p to regulate K63 polyubiquitination in response to oxidative stress and to monoubiquinate histone H2B-K123, which is required for the subsequent methylation of histone H3-K4 and H3-K79; required for DSBR, transcription, silencing, and checkpoint control; interacts with RNA-binding protein Npl3p, linking histone ubiquitination to mRNA processing; Br…
YDL075W	-0.405	-0.8465	-0.932	-0.728	0.282831	0.53366	0.005377	12304.2	YDL075W	RPL31A	eL31|ribosomal 60S subunit protein L31A|L31e|YL28|L34A|L31A|RPL34	ORF	Verified	Ribosomal 60S subunit protein L31A; associates with karyopherin Sxm1p; loss of both Rpl31p and Rpl39p confers lethality; homologous to mammalian ribosomal protein L31, no bacterial homolog; RPL31A has a paralog, RPL31B, that arose from the whole genome duplication
YDL076C	-0.038	-0.0875	-0.389	-0.172	0.18998	6.4217	0.149055	10234.2	YDL076C	RXT3		ORF	Verified	Component of the Rpd3L histone deacetylase complex; involved in histone deacetylation; protein abundance increases in response to DNA replication stress
YDL077C	-0.059	-0.243	-0.292	-0.198	0.122845	3.13349	0.029866	5669.38	YDL077C	VAM6	VPS39|VPL22|VPL18|CVT4	ORF	Verified	Guanine nucleotide exchange factor for the GTPase Gtr1p; subunit of the HOPS endocytic tethering complex; vacuole membrane protein; functions as a Rab GTPase effector, interacting with both GTP- and GDP-bound conformations of Ypt7p; facilitates tethering and promotes membrane fusion events at the late endosome and vacuole; required for both membrane and protein trafficking; component of vacuole-m…
YDL078C	0.1265	0.299	0.003	0.143	0.148674	7.2705	0.114999	47151.1	YDL078C	MDH3	malate dehydrogenase MDH3	ORF	Verified	Peroxisomal malate dehydrogenase; catalyzes interconversion of malate and oxaloacetate; involved in the glyoxylate cycle
YDL079C	-0.6615	0.091	0.002	-0.19	0.411179	11.39	0.364171	27145	YDL079C	MRK1	putative serine/threonine protein kinase MRK1	ORF	Verified	Glycogen synthase kinase 3 (GSK-3) homolog; one of four GSK-3 homologs in S. cerevisiae that function to activate Msn2p-dependent transcription of stress responsive genes and that function in protein degradation; MRK1 has a paralog, RIM11, that arose from the whole genome duplication
YDL080C	-0.5235	-0.246	-0.3095	-0.36	0.145393	1.12186	0.014606	10822.8	YDL080C	THI3	branched-chain-2-oxoacid decarboxylase THI3|KID1	ORF	Verified	Regulatory protein that binds Pdc2p and Thi2p transcription factors; activates thiamine biosynthesis transcription factors Pdc2p and Thi2p by binding to them, but releases and de-activates them upon binding to thiamine pyrophosphate (TPP), the end product of the pathway; has similarity to decarboxylases but enzymatic activity is not detected
YDL081C	-1.2145	-1.279	-0.809	-1.101	0.254784	0.210183	0.002086	1863.56	YDL081C	RPP1A	P1A|ribosomal protein P1A|RPLA1	ORF	Verified	Ribosomal stalk protein P1 alpha; involved in the interaction between translational elongation factors and the ribosome; free (non-ribosomal) P1 stimulates the phosphorylation of the eIF2 alpha subunit (Sui2p) by Gcn2p; accumulation of P1 in the cytoplasm is regulated by phosphorylation and interaction with the P2 stalk component
YDL082W	-0.493	-0.453	-0.8855	-0.61	0.238995	0.642288	0.005592	26496.2	YDL082W	RPL13A	eL13|ribosomal 60S subunit protein L13A|L13e|L13A	ORF	Verified	Ribosomal 60S subunit protein L13A; not essential for viability; homologous to mammalian ribosomal protein L13, no bacterial homolog; RPL13A has a paralog, RPL13B, that arose from the whole genome duplication
YDL083C	0.016	-0.672	-0.6585	-0.438	0.393378	2.05051	0.061714	25343.6	YDL083C	RPS16B	uS9|ribosomal 40S subunit protein S16B|S9|rp61R|S16B	ORF	Verified	Protein component of the small (40S) ribosomal subunit; homologous to mammalian ribosomal protein S16 and bacterial S9; RPS16B has a paralog, RPS16A, that arose from the whole genome duplication
YDL084W	-0.338	-0.154	-0.319	-0.27	0.101195	1.38813	0.005939	29806.8	YDL084W	SUB2	ATP-dependent RNA helicase SUB2	ORF	Verified	Component of the TREX complex required for nuclear mRNA export; member of the DEAD-box RNA helicase superfamily and is involved in early and late steps of spliceosome assembly; homolog of the human splicing factor hUAP56; relocalizes from nucleus to cytoplasm upon DNA replication stress
YDL085C-A	-0.7965	-0.546	0.195	-0.383	0.515575	3.51475	0.165476	666.618	YDL085C-A	YDL085C-A		ORF	Uncharacterized	Putative protein of unknown function; green fluorescent protein (GFP)-fusion protein localizes to the cytoplasm and nucleus
YDL085W	-1.548	-0.6325	-0.765	-0.982	0.49477	0.513075	0.011706	13622.2	YDL085W	NDE2	NADH-ubiquinone reductase (H(+)-translocating) NDE2|NDH2	ORF	Verified	Mitochondrial external NADH dehydrogenase; catalyzes the oxidation of cytosolic NADH; Nde1p and Nde2p are involved in providing the cytosolic NADH to the mitochondrial respiratory chain; NDE2 has a paralog, NDE1, that arose from the whole genome duplication
YDL086W	0.854	0.2845	0.5015	0.547	0.287424	0.960613	0.038346	36127	YDL086W	YDL086W	carboxymethylenebutenolidase	ORF	Uncharacterized	Putative carboxymethylenebutenolidase; the authentic, non-tagged protein is detected in highly purified mitochondria in high-throughput studies; YDL086W is not an essential gene
YDL087C	-0.3435	0.192	0.586	0.145	0.466542	22.1899	0.546396	2917.84	YDL087C	LUC7	EPE1|EXM2	ORF	Verified	Essential protein associated with the U1 snRNP complex; splicing factor involved in recognition of 5' splice site; contains two zinc finger motifs; N-terminal zinc finger binds pre-mRNA; relocalizes to the cytosol in response to hypoxia
YDL088C	0.1335	-0.0565	-0.368	-0.097	0.253191	26.9095	0.478498	11897.3	YDL088C	ASM4	FG-nucleoporin ASM4|NUP59	ORF	Verified	FG-nucleoporin component of central core of nuclear pore complex (NPC); contributes directly to nucleocytoplasmic transport; induces membrane tubulation, which may contribute to nuclear pore assembly; ASM4 has a paralog, NUP53, that arose from the whole genome duplication
YDL089W	-0.0725	0.2175	-0.1155	0.01	0.181125	1811.25	0.933137	9029.06	YDL089W	NUR1		ORF	Verified	Protein involved in regulation of mitotic exit; dephosphorylation target of Cdc14p in anaphase, which promotes timely rDNA segregation and allows mitotic progression; interacts with Csm1p, Lrs4p; required for rDNA repeat stability; null mutant causes increase in unequal sister-chromatid exchange; GFP-fusion protein localizes to the nuclear periphery, possible Cdc28p substrate
YDL090C	0.8535	0.8505	0.6785	0.794	0.100182	0.158908	0.000646	5819.91	YDL090C	RAM1	protein farnesyltransferase|STE16|SGP2|SCG2|FUS8|DPR1	ORF	Verified	Beta subunit of the CAAX farnesyltransferase (FTase); this complex prenylates the a-factor mating pheromone and Ras proteins; required for the membrane localization of Ras proteins and a-factor; homolog of the mammalian FTase beta subunit
YDL091C	0.367	0.583	0.4335	0.461	0.110626	0.520541	0.003113	46101.6	YDL091C	UBX3		ORF	Verified	Clathrin-coated vesicle component, regulator of endocytosis; copurifies with the DSC ubiquitin ligase complex; UBX (ubiquitin regulatory X) domain-containing protein that interacts with Cdc48p; required for efficient clathrin-mediated endocytosis; ortholog of fission yeast Ucp10
YDL092W	0.7045	-0.3615	-0.786	-0.148	0.767913	35.0581	0.719452	1391.35	YDL092W	SRP14	RNA-binding signal recognition particle subunit SRP14	ORF	Verified	Signal recognition particle (SRP) subunit; interacts with the RNA component of SRP to form the Alu domain, which is the region of SRP responsible for arrest of nascent chain elongation during membrane targeting; homolog of mammalian SRP14
YDL093W	0.497	0.18	0.128	0.268	0.199731	2.78083	0.037724	2841.68	YDL093W	PMT5	putative dolichyl-phosphate-mannose-protein mannosyltransferase PMT5	ORF	Verified	Protein O-mannosyltransferase; transfers mannose residues from dolichyl phosphate-D-mannose to protein serine/threonine residues; acts in a complex with Pmt3p, can instead interact with Pmt2p in some conditions; target for new antifungals
YDL094C	-0.1945	-1.2275	-0.3355	-0.586	0.560154	1.63122	0.104835	308.567	YDL094C	YDL094C		ORF	Dubious	Dubious open reading frame; unlikely to encode a functional protein, based on available experimental and comparative sequence data; partially overlaps verfied gene PMT5/YDL093W; YDL094C is not essential
YDL095W	-0.108	0.136	0.1065	0.045	0.133177	65.7664	0.549067	26099.3	YDL095W	PMT1	dolichyl-phosphate-mannose-protein mannosyltransferase PMT1	ORF	Verified	Protein O-mannosyltransferase of the ER membrane; transfers mannose from dolichyl phosphate-D-mannose to protein serine and threonine residues; 1 of 7 related proteins involved in O-glycosylation which is essential for cell wall rigidity; involved in ER quality control; amino terminus faces cytoplasm, carboxyl terminus faces ER lumen
YDL096C	-0.1885	-0.1245	-0.139	-0.151	0.0335572	1.47174	0.009575	523.75	YDL096C	OPI6		ORF	Dubious	Dubious open reading frame; unlikely to encode a functional protein, based on available experimental and comparative sequence data; partially overlaps verified gene PMT1/YDL095W; YDL096C is not essential
YDL097C	0.5145	0.3375	0.264	0.372	0.128764	0.930486	0.034374	46066	YDL097C	RPN6	proteasome regulatory particle lid subunit RPN6|NAS4	ORF	Verified	Essential, non-ATPase regulatory subunit of the 26S proteasome lid; required for the assembly and activity of the 26S proteasome; the human homolog (S9 protein) partially rescues Rpn6p depletion; protein abundance increases in response to DNA replication stress
YDL098C	0.578	0.034	0.045	0.219	0.310952	6.48343	0.18624	3015.09	YDL098C	SNU23	U4/U6-U5 snRNP complex subunit SNU23	ORF	Verified	Component of the U4/U6.U5 snRNP complex; involved in mRNA splicing via spliceosome
YDL099W	0.1055	0.3245	0.599	0.343	0.24727	2.10176	0.037121	66891.8	YDL099W	BUG1		ORF	Verified	Cis-golgi localized protein involved in ER to Golgi transport; forms a complex with the mammalian GRASP65 homolog, Grh1p; mutants are compromised for the fusion of ER-derived vesicles with Golgi membranes
YDL100C	0.824	0.277	-0.002	0.366	0.420184	3.13673	0.114223	11310.1	YDL100C	GET3	guanine nucleotide exchange factor GET3|ARR4	ORF	Verified	Guanine nucleotide exchange factor for Gpa1p; amplifies G protein signaling; functions as a chaperone under ATP-depleted oxidative stress conditions; subunit of GET complex, involved in ATP dependent Golgi to ER trafficking and insertion of tail-anchored (TA) proteins into ER membrane under non-stress conditions; binds as dimer to transmembrane domain (TMD) cargo, shielding TMDs from aqueous solv…
YDL101C	0.873	0.567	0.573	0.671	0.174963	0.388598	0.001842	5766.81	YDL101C	DUN1	serine/threonine protein kinase DUN1	ORF	Verified	Cell-cycle checkpoint S/T protein kinase; required for transient G2/M arrest after DNA damage, damage-induced transcription, and nuclear-to-cytoplasmic redistribution of Rnr2p-Rnr4p after genotoxic stress and iron deprivation; phosphorylates repair protein Rad55p, transcriptional repressor Sml1p, superoxide dismutase, and ribonucleotide reductase inhibitors Crt1p and Dif1p; functions in the Mec1p…
YDL102W	0.6615	0.2335	0.5575	0.484	0.223225	0.95291	0.010836	11514	YDL102W	POL3	DNA-directed DNA polymerase delta POL3|CDC2|TEX1|HPR6	ORF	Verified	Catalytic subunit of DNA polymerase delta; required for chromosomal DNA replication during mitosis and meiosis, intragenic recombination, repair of double strand DNA breaks, and DNA replication during nucleotide excision repair (NER)
YDL103C	1.0045	0.3545	0.5475	0.636	0.333816	0.825264	0.016585	13781.9	YDL103C	QRI1	UDP-N-acetylglucosamine diphosphorylase|UAP1	ORF	Verified	UDP-N-acetylglucosamine pyrophosphorylase; catalyzes the formation of UDP-N-acetylglucosamine (UDP-GlcNAc), which is important in cell wall biosynthesis, protein N-glycosylation, and GPI anchor biosynthesis; protein abundance increases in response to DNA replication stress
YDL104C	0.1795	-0.1805	-0.0025	-0.001	0.180004	180004	1	4981.73	YDL104C	QRI7	putative N(6)-L-threonylcarbamoyladenine synthase	ORF	Verified	Protein involved in threonylcarbamoyl adenosine biosynthesis; Sua5p and Qri7p are necessary and sufficient for RNA t6A modification in vitro; highly conserved mitochondrial protein; essential for t6A modification of mitochondrial tRNAs that decode ANN codons; similar to Kae1p and E. coli YgjD, both of which are also required for tRNA t6A modification; when directed to the cytoplasm, complements t…
YDL105W	-0.985	0.0255	0.3315	-0.209	0.688951	15.7723	0.610187	427.603	YDL105W	NSE4	Smc5-Smc6 complex subunit NSE4|QRI2	ORF	Verified	Component of the SMC5-SMC6 complex; this complex plays a key role in the removal of X-shaped DNA structures that arise between sister chromatids during DNA replication and repair
YDL106C	-0.9425	-0.2485	-0.1175	-0.436	0.443363	2.33231	0.086624	5647.46	YDL106C	PHO2	phoB|GRF10|BAS2	ORF	Verified	Homeobox transcription factor; regulatory targets include genes involved in phosphate metabolism; binds cooperatively with Pho4p to the PHO5 promoter; phosphorylation of Pho2p facilitates interaction with Pho4p; relocalizes to the cytosol in response to hypoxia
YDL107W	0.8285	0.5925	0.0995	0.507	0.371974	1.44709	0.051019	5479.79	YDL107W	MSS2		ORF	Verified	Peripherally bound inner membrane protein of the mitochondrial matrix; involved in membrane insertion of C-terminus of Cox2p, interacts genetically and physically with Cox18p
YDL108W	0.482	-0.3175	-0.4385	-0.091	0.500194	60.4026	0.732954	6976.27	YDL108W	KIN28	TFIIH complex serine/threonine-protein kinase subunit KIN28	ORF	Verified	Serine/threonine protein kinase, subunit of transcription factor TFIIH; involved in transcription initiation at RNA polymerase II promoters; phosphorylates Ser5 residue of the PolII C-terminal domain (CTD) at gene promoters; relocalizes to the cytosol in response to hypoxia
YDL109C	-0.37	0.0425	0.2465	-0.027	0.314071	430.825	0.88484	2026.53	YDL109C	YDL109C	putative lipase	ORF	Uncharacterized	Putative lipase; involved in lipid metabolism; not an essential gene; YDL109C has a paralog, ROG1, that arose from the whole genome duplication
YDL110C	0.538	0.0595	-0.2485	0.116	0.396318	29.4529	0.709688	53114.8	YDL110C	TMA17	ADC17	ORF	Verified	ATPase dedicated chaperone that adapts proteasome assembly to stress; Tma17p is induced upon stress; interacts with Rpt6p to assist its pairing to Rpt3p and early steps in proteasome biogenesis; associates with ribosomes; heterozygous deletion demonstrated increases in chromosome instability in a rad9 deletion background; protein abundance is decreased upon intracellular iron depletion
YDL111C	0.687	-0.3005	0.06	0.149	0.499707	22.5083	0.563452	5024.9	YDL111C	RRP42	exosome non-catalytic core subunit RRP42	ORF	Verified	Exosome non-catalytic core component; involved in 3'-5' RNA processing and degradation in both the nucleus and the cytoplasm; has similarity to E. coli RNase PH and to human hRrp42p (EXOSC7)
YDL112W	-0.0915	-0.7075	-0.5045	-0.434	0.313909	1.66657	0.034066	7216.93	YDL112W	TRM3	tRNA (guanosine(18)-2'-O)-methyltransferase	ORF	Verified	2'-O-ribose methyltransferase; catalyzes the ribose methylation of the guanosine nucleotide at position 18 of tRNAs
YDL113C	-0.076	0.499	0.396	0.273	0.306599	4.11382	0.124732	2454.47	YDL113C	ATG20	CVT20|SNX42	ORF	Verified	Sorting nexin family member; required for the cytoplasm-to-vacuole targeting (Cvt) pathway and for endosomal sorting; has a Phox homology domain that binds phosphatidylinositol-3-phosphate; interacts with Snx4p; potential Cdc28p substrate
YDL114W	1.8885	1.7705	1.3135	1.657	0.303699	0.110611	0.001047	445.574	YDL114W	YDL114W	short-chain dehydrogenase/reductase	ORF	Uncharacterized	Putative short-chain dehydrogenase/reductase; YDL114W is not an essential gene
YDL114W-A	-0.4815	0.0465	0.0965	-0.113	0.320252	25.0804	0.667643	354.794	YDL114W-A	YDL114W-A		ORF	Dubious	Dubious open reading frame; unlikely to encode a functional protein, based on available experimental and comparative sequence data; identified based on homology to hemiascomycetous yeasts
YDL115C	-0.334	0.214	0.121	0	0.293251	1000000	1	31974.9	YDL115C	IWR1		ORF	Verified	RNA polymerase II transport factor, conserved from yeast to humans; also has a role in transporting RNA polymerase III into the nucleus; interacts with most of the RNAP II subunits; nucleo-cytoplasmic shuttling protein; deletion causes hypersensitivity to K1 killer toxin; protein increases in abundance and relocalizes from nucleus to cytoplasm upon DNA replication stress
YDL116W	-0.714	-0.593	-0.722	-0.676	0.0722795	0.158169	0.000359	6951	YDL116W	NUP84		ORF	Verified	Subunit of the Nup84p subcomplex of the nuclear pore complex (NPC); contributes to nucleocytoplasmic transport and NPC biogenesis; also plays roles in several processes that may require localization of genes or chromosomes at the nuclear periphery, including double-strand break repair, transcription and chromatin silencing; homologous to human NUP107
YDL117W	-0.108	0.108	0.1295	0.043	0.131355	71.041	0.73016	5266.46	YDL117W	CYK3		ORF	Verified	SH3-domain protein located in the bud neck and cytokinetic actin ring; relocalizes from bud neck to nucleus upon DNA replication stress; activates the chitin synthase activity of Chs2p during cytokinesis; suppressor of growth and cytokinesis defects of chs2 phospho-mutants
YDL118W	0	0	0.9415	0.942	0.543575	0.612573	0.175477	302.471	YDL118W	YDL118W		ORF	Dubious	Dubious open reading frame, unlikely to encode a protein; overlaps almost completely with YDL119C; mutations that would affect both YDL118W and YDL119C confer defective telomere maintenance and are synthetically sick or lethal with alpha-synuclein
YDL119C	0.7105	0.8285	0.406	0.648	0.218002	0.519172	0.007409	2679.88	YDL119C	HEM25		ORF	Verified	Mitochondrial glycine transporter; required for the transport of glycine into mitochondria for initiation of heme biosynthesis, with YMC1 acting as a secondary transporter; homolog of human SLC25A38, a mitochondrial glycine transporter associated with nonsyndromic autosomal recessive congenital sideroblastic anemia; human SLC25A38 can complement the heme deficiency associated with the null mutant…
YDL120W	0.6215	0.5	0.506	0.543	0.0684817	0.23226	0.000622	22644.3	YDL120W	YFH1	ferroxidase	ORF	Verified	Mitochondrial matrix iron chaperone; oxidizes and stores iron; interacts with Isu1p to promote Fe-S cluster assembly; mutation results in multiple Fe/S-dependent enzyme deficiencies; human frataxin homolog FXN is mutated in Friedrich's ataxia; human FTL gene can complement yeast yfh1 null mutant
YDL121C	0.491	0.1415	-0.005	0.209	0.25483	5.83388	0.134247	5532.68	YDL121C	YDL121C		ORF	Uncharacterized	Putative protein of unknown function; green fluorescent protein (GFP)-fusion protein localizes to the endoplasmic reticulum; YDL121C is not an essential protein
YDL122W	-0.399	-0.4855	-0.286	-0.39	0.100043	0.657744	0.005314	26395.8	YDL122W	UBP1	ubiquitin-specific protease UBP1	ORF	Verified	Ubiquitin-specific protease; removes ubiquitin from ubiquitinated proteins; cleaves at the C terminus of ubiquitin fusions irrespective of their size; capable of cleaving polyubiquitin chains
YDL123W	-1.2215	-0.127	0.2295	-0.373	0.756133	5.43476	0.327976	16432.2	YDL123W	SNA4		ORF	Verified	Protein of unknown function; localized to the vacuolar outer membrane; predicted to be palmitoylated
YDL124W	-0.623	-0.4205	-0.6375	-0.56	0.121316	0.38685	0.001135	14711.3	YDL124W	YDL124W	aldo-keto reductase superfamily protein	ORF	Verified	NADPH-dependent alpha-keto amide reductase; reduces aromatic alpha-keto amides, aliphatic alpha-keto esters, and aromatic alpha-keto esters; member of the aldo-keto reductase (AKR) family; protein abundance increases in response to DNA replication stress
YDL125C	-0.0485	-0.3305	-0.639	-0.339	0.295349	2.57002	0.059625	32465.9	YDL125C	HNT1	adenosine 5'-monophosphoramidase	ORF	Verified	Adenosine 5'-monophosphoramidase; interacts physically and genetically with Kin28p, a CDK and TFIIK subunit, and genetically with CAK1; member of histidine triad (HIT) superfamily of nucleotide-binding proteins; protein abundance increases in response to DNA replication stress; human homolog HINT1 can complement yeast hnt1 mutant
YDL126C	0.048	-0.012	0.3215	0.119	0.177775	12.5539	0.348337	44383.2	YDL126C	CDC48	AAA family ATPase CDC48	ORF	Verified	AAA ATPase; subunit of polyUb-selective segregase complex involved in ERAD, INM-associated degradation (INMAD), mitotic spindle disassembly, macroautophagy, PMN, ribosome-associated degradation, ribophagy, homotypic ER membrane fusion, SCF complex disassembly, cell wall integrity during heat stress, and telomerase regulation; mobilizes membrane-anchored transcription factors by regulated Ub/prote…
YDL127W	-0.3655	-0.6045	-0.362	-0.444	0.139008	0.705138	0.010792	664.235	YDL127W	PCL2	cyclin PCL2|CLN4	ORF	Verified	Cyclin, interacts with cyclin-dependent kinase Pho85p; member of the Pcl1,2-like subfamily, involved in the regulation of polarized growth and morphogenesis and progression through the cell cycle; localizes to sites of polarized cell growth; PCL2 has a paralog, PCL9, that arose from the whole genome duplication
YDL128W	-0.422	0.171	0.203	-0.016	0.35197	1374.88	0.951476	36903.9	YDL128W	VCX1	MNR1|HUM1	ORF	Verified	Vacuolar membrane antiporter with Ca2+/H+ and K+/H+ exchange activity; involved in control of cytosolic Ca2+ and K+ concentrations; has similarity to sodium/calcium exchangers, including the bovine Na+/Ca2+,K+ antiporter
YDL129W	-1.9095	-0.182	-0.017	-0.703	1.04826	2.12108	0.199286	1136.66	YDL129W	YDL129W		ORF	Verified	Protein of unknown function; green fluorescent protein (GFP)-fusion protein localizes to the cytoplasm and the nucleus; YDL129W is not an essential gene; relative distribution to the nucleus increases upon DNA replication stress
YDL130W	-0.388	-0.7115	-0.951	-0.684	0.282542	0.603909	0.006496	4498.28	YDL130W	RPP1B	ribosomal protein P1B|YP1beta|P1B|L44'|Ax|RPLA3|RPL44'	ORF	Verified	Ribosomal protein P1 beta; component of the ribosomal stalk, which is involved in interaction of translational elongation factors with ribosome; free (non-ribosomal) P1 stimulates the phosphorylation of the eIF2 alpha subunit (Sui2p) by Gcn2p; accumulation is regulated by phosphorylation and interaction with the P2 stalk component
YDL130W-A	0.2545	-0.6385	-1.814	-0.733	1.03746	1.93092	0.180982	11430.9	YDL130W-A	STF1	ATPase-binding protein|AIS2	ORF	Verified	Protein involved in regulation of the mitochondrial F1F0-ATP synthase; Stf1p and Stf2p act as stabilizing factors that enhance inhibitory action of the Inh1p protein; protein abundance increases in response to DNA replication stress; STF1 has a paralog, INH1, that arose from the whole genome duplication
YDL131W	0.3575	-0.5675	-0.1795	-0.13	0.464496	27.485	0.584901	27693	YDL131W	LYS21	homocitrate synthase LYS21	ORF	Verified	Homocitrate synthase isozyme; catalyzes the condensation of acetyl-CoA and alpha-ketoglutarate to form homocitrate, which is the first step in the lysine biosynthesis pathway; LYS21 has a paralog, LYS20, that arose from the whole genome duplication
YDL132W	-0.002	0.256	0.231	0.162	0.14229	5.4218	0.071614	10086.7	YDL132W	CDC53	cullin CDC53	ORF	Verified	Cullin; structural protein of SCF complexes (which also contain Skp1p, Cdc34p, Hrt1p and an F-box protein) involved in ubiquitination; SCF promotes the G1-S transition by targeting G1 cyclins and the Cln-CDK inhibitor Sic1p for degradation; human homolog CUL1 can complement yeast cdc53 null mutant
YDL133C-A	-0.2165	-0.5315	-0.806	-0.518	0.294982	1.09935	0.017966	1663.37	YDL133C-A	RPL41B	eL41|ribosomal 60S subunit protein L41B|L41e|YL41|L47B|L41B|YDL134C-A|RPL47B	ORF	Verified	Ribosomal 60S subunit protein L41B; comprises only 25 amino acids; rpl41a rpl41b double null mutant is viable; homologous to mammalian ribosomal protein L41, no bacterial homolog; RPL41B has a paralog, RPL41A, that arose from the whole genome duplication
YDL133W	-0.3445	0.651	0.527	0.278	0.542511	7.01971	0.313981	24131.7	YDL133W	SRF1		ORF	Verified	Regulator of phospholipase D (Spo14p); interacts with Spo14p and regulates its catalytic activity; capable of buffering the toxicity of C16:0 platelet activating factor, a lipid that accumulates intraneuronally in Alzheimer's patients
YDL134C	0.3355	0.0275	-0.0055	0.119	0.188075	13.2812	0.245329	43519.7	YDL134C	PPH21	phosphoprotein phosphatase 2A catalytic subunit PPH21	ORF	Verified	Catalytic subunit of protein phosphatase 2A (PP2A); functionally redundant with Pph22p; methylated at C terminus; forms alternate complexes with several regulatory subunits; involved in signal transduction and regulation of mitosis; forms nuclear foci upon DNA replication stress; PPH21 has a paralog, PPH22, that arose from the whole genome duplication
YDL135C	0.7365	0.9915	0.614	0.78	0.192587	0.316546	0.002255	5460.87	YDL135C	RDI1		ORF	Verified	Rho GDP dissociation inhibitor; involved in the localization and regulation of Cdc42p and Rho1p; protein abundance increases in response to DNA replication stress
YDL136W	-0.829	-0.8625	-1.2715	-0.988	0.246377	0.252398	0.001667	7219.02	YDL136W	RPL35B	uL29|ribosomal 60S subunit protein L35B|L35B|L29|SOS2	ORF	Verified	Ribosomal 60S subunit protein L35B; homologous to mammalian ribosomal protein L35 and bacterial L29; RPL35B has a paralog, RPL35A, that arose from the whole genome duplication
YDL137W	0.837	0.434	0.1015	0.458	0.368313	1.75584	0.051103	54594.6	YDL137W	ARF2	Arf family GTPase ARF2	ORF	Verified	ADP-ribosylation factor; GTPase of the Ras superfamily involved in regulation of coated formation vesicles in intracellular trafficking within the Golgi; ARF2 has a paralog, ARF1, that arose from the whole genome duplication; arf1 arf2 double null mutation is complemented by human ARF1, ARF4, ARF5, or ARF6
YDL138W	1.313	1.299	0.4295	1.014	0.506096	0.492217	0.016719	3368.34	YDL138W	RGT2	glucose sensor	ORF	Verified	Plasma membrane high glucose sensor that regulates glucose transport; low affinity sesnor that contains 12 predicted transmembrane segments and a long C-terminal tail required for hexose transporter induction; phosphorylation of the tail by Yck1p/Yck2p facilitates binding to the HXT co-repressors, Mth1p and Std1p; RGT2 has a paralog, SNF3, that arose from the whole genome duplication
YDL139C	0.667	0.0975	0.089	0.285	0.331282	4.07857	0.121128	4492.03	YDL139C	SCM3		ORF	Verified	Nonhistone component of centromeric chromatin; binds to histone H3 variant, Cse4p, and recruits it to centromeres; involved in the assembly and maintenance of Cse4-H4 at centromeres; required for kinetochore assembly and G2/M progression; may protect Cse4p from ubiquitination; homolog of mammalian HJURP
YDL140C	0.1165	-0.103	-0.226	-0.071	0.173501	34.418	0.532337	4308.13	YDL140C	RPO21	DNA-directed RNA polymerase II core subunit RPO21|B220|SUA8|RPB220|RPB1	ORF	Verified	RNA polymerase II largest subunit B220; part of central core; phosphorylation of C-terminal heptapeptide repeat domain regulates association with transcription and splicing factors; similar to bacterial beta-prime
YDL141W	0.2725	-0.1305	0.188	0.11	0.212521	17.5637	0.35562	9728.99	YDL141W	BPL1	biotin--[acetyl-CoA-carboxylase] ligase BPL1|ACC2	ORF	Verified	Biotin:apoprotein ligase; covalently modifies proteins with the addition of biotin, required for acetyl-CoA carboxylase (Acc1p) holoenzyme formation; comparative analysis suggests that a mitochondrially targeted form may result from translation starting at a non-canonical codon upstream of the annotated start codon; human homolog HLCS can complement yeast BPL1 mutant
YDL142C	0.1905	0.3325	0.2175	0.247	0.0754078	1.23601	0.009337	11965.1	YDL142C	CRD1	cardiolipin synthase|CLS1	ORF	Verified	Cardiolipin synthase; produces cardiolipin, which is a phospholipid of the mitochondrial inner membrane that is required for normal mitochondrial membrane potential and function and for correct integration of membrane-multispanning proteins into the mitochondrial outer membrane; required to maintain tubular mitochondrial morphology and functions in mitochondrial fusion; also required for normal v…
YDL143W	0.1325	-0.1785	0.0575	0.004	0.162297	10143.6	0.992901	59391.8	YDL143W	CCT4	chaperonin-containing T-complex subunit CCT4|ANC2|TCP4	ORF	Verified	Subunit of the cytosolic chaperonin Cct ring complex; related to Tcp1p, required for the assembly of actin and tubulins in vivo
YDL144C	0.7115	0.149	0.3545	0.405	0.28463	1.73528	0.030745	26221.9	YDL144C	YDL144C		ORF	Verified	Protein of unknown function; green fluorescent protein (GFP)-fusion protein localizes to the cytoplasm and nucleus; YDL144C is not an essential gene; protein abundance increases in response to DNA replication stress
YDL145C	-0.3105	-0.1215	-0.015	-0.149	0.149657	6.74101	0.088282	9974.47	YDL145C	COP1	coatomer subunit alpha|SOO1|RET1|SEC33	ORF	Verified	Alpha subunit of COPI vesicle coatomer complex; complex surrounds transport vesicles in the early secretory pathway
YDL146W	-0.8695	-0.7895	-1.052	-0.904	0.134544	0.164637	0.001133	3066.97	YDL146W	LDB17		ORF	Verified	Protein involved in the regulation of endocytosis; transiently recruited to actin cortical patches in a SLA1-dependent manner after late coat component assembly; GFP-fusion protein localizes to the periphery, cytoplasm, bud, and bud neck
YDL147W	0.42	0.7315	0.5365	0.563	0.15739	0.496547	0.005962	22847.6	YDL147W	RPN5	proteasome regulatory particle lid subunit RPN5|NAS5	ORF	Verified	Subunit of the CSN and 26S proteasome lid complexes; similar to mammalian p55 subunit and to another S. cerevisiae regulatory subunit, Rpn7p; Rpn5p is an essential protein; the COP9 signalosome is also known as the CSN
YDL148C	-0.977	-0.687	-0.3345	-0.666	0.321756	0.725402	0.013289	1291.78	YDL148C	NOP14	snoRNA-binding rRNA-processing protein NOP14|UTP2	ORF	Verified	Nucleolar protein; forms a complex with Noc4p that mediates maturation and nuclear export of 40S ribosomal subunits; also present in the small subunit processome complex, which is required for processing of pre-18S rRNA
YDL149W	-0.3025	-0.2245	-0.294	-0.274	0.0427912	0.569971	0.001213	4574.88	YDL149W	ATG9	autophagy protein ATG9|CVT6|APG9|CVT7|AUT9	ORF	Verified	Transmembrane protein involved in forming Cvt and autophagic vesicles; cycles between the phagophore assembly site (PAS) and other cytosolic punctate structures, not found in autophagosomes; may be involved in membrane delivery to the PAS
YDL150W	0.3955	-0.0065	-0.0145	0.125	0.234438	15.0041	0.332679	695.485	YDL150W	RPC53	DNA-directed RNA polymerase III subunit C53|C53|RPC4	ORF	Verified	RNA polymerase III subunit C53
YDL151C	1.098	0	0.8655	0.982	0.578612	0.600018	0.083303	304.474	YDL151C	BUD30		ORF	Dubious	Dubious open reading frame; unlikely to encode a functional protein, based on available experimental and comparative sequence data; not conserved in closely related Saccharomyces species; 96% of ORF overlaps the verified gene RPC53; diploid mutant displays a weak budding pattern phenotype in a systematic assay
YDL152W	0	0	0.4265	0.427	0.24624	1.35053	0.436613	581.7	YDL152W	YDL152W		ORF	Dubious	Dubious open reading frame; unlikely to encode a functional protein, based on available experimental and comparative sequence data; partially overlaps the verified ORF SAS10/YDL153C, a component of the small ribosomal subunit processosome
YDL153C	-0.0415	-0.1265	-0.0575	-0.075	0.04517	8.03023	0.068543	28617.2	YDL153C	SAS10	rRNA-processing protein SAS10|UTP3	ORF	Verified	Subunit of U3-containing Small Subunit (SSU) processome complex; involved in production of 18S rRNA and assembly of small ribosomal subunit; disrupts silencing when overproduced; mutant has increased aneuploidy tolerance; essential gene
YDL154W	0.181	0.5825	0.3775	0.38	0.200765	1.39034	0.09255	8921.28	YDL154W	MSH5	MutS family protein MSH5	ORF	Verified	Protein of the MutS family; forms a dimer with Msh4p that facilitates crossovers between homologs during meiosis; msh5-Y823H mutation confers tolerance to DNA alkylating agents; homologs present in C. elegans and humans
YDL155W	0.232	0.3535	0.5435	0.376	0.157	1.11052	0.01635	24327.2	YDL155W	CLB3	B-type cyclin CLB3	ORF	Verified	B-type cyclin involved in cell cycle progression; activates Cdc28p to promote the G2/M transition; may be involved in DNA replication and spindle assembly; accumulates during S phase and G2, then targeted for ubiquitin-mediated degradation; relative distribution to the nucleus increases upon DNA replication stress; CLB3 has a paralog, CLB4, that arose from the whole genome duplication
YDL156W	0.4365	0.697	0.5915	0.575	0.131031	0.396315	0.001793	1010.65	YDL156W	CMR1		ORF	Verified	Nuclear protein with a role in protein quality control; localizes to the intranuclear quality control compartment (INQ) in response to proteasome inhibition or DNA replication stress; INQ likely sequesters proteins involved in DNA metabolism for degradation or re-folding; DNA-binding protein with preference for UV-damaged DNA; contains three WD domains (WD-40 repeat); human ortholog WDR76 also ex…
YDL157C	0.856	0.289	0.011	0.385	0.430658	2.90543	0.114997	11637.3	YDL157C	YDL157C		ORF	Uncharacterized	Putative protein of unknown function; the authentic, non-tagged protein is detected in highly purified mitochondria in high-throughput studies
YDL158C	0.1575	-0.2075	-0.3315	-0.127	0.254205	15.7608	0.344958	1435.71	YDL158C	YDL158C		ORF	Dubious	Dubious open reading frame; unlikely to encode a functional protein, based on available experimental and comparative sequence data
YDL159W	0.413	0.0855	0.3305	0.276	0.170337	2.23609	0.033469	5020.18	YDL159W	STE7	mitogen-activated protein kinase kinase STE7	ORF	Verified	Signal transducing MAP kinase kinase; involved in pheromone response where it phosphorylates Fus3p; involved in the pseudohyphal/invasive growth pathway where it phosphorylates of Kss1p; phosphorylated by Ste11p; degraded by ubiquitin pathway
YDL159W-A	0	0	0.564	0.564	0.325626	1.02367	1	291.167	YDL159W-A	YDL159W-A	YDL159W-B	ORF	Uncharacterized	Putative protein of unknown function; identified by sequence comparison with hemiascomycetous yeast species
YDL160C	-1.117	-0.261	-0.1365	-0.505	0.533794	2.0931	0.104309	4852.13	YDL160C	DHH1	DExD/H-box ATP-dependent RNA helicase DHH1	ORF	Verified	Cytoplasmic DEAD-box helicase, stimulates mRNA decapping; coordinates distinct steps in mRNA function and decay, interacting with both decapping and deadenylase complexes; role in translational repression, mRNA decay, and possibly mRNA export; interacts and cooperates with Ngr1p to promote specific mRNA decay; ATP- and RNA-bound form promotes processing body (PB) assembly, while ATPase stimulatio…
YDL161W	1.277	0.9525	0.9945	1.075	0.17648	0.152714	0.000702	49296.6	YDL161W	ENT1	epsin	ORF	Verified	Epsin-like protein involved in endocytosis and actin patch assembly; functionally redundant with Ent2p; binds clathrin via a clathrin-binding domain motif at C-terminus; relocalizes from bud neck to cytoplasm upon DNA replication stress; ENT1 has a paralog, ENT2, that arose from the whole genome duplication
YDL162C	0	0	0.609	0.609	0.351606	0.94803	1	440.273	YDL162C	YDL162C		ORF	Dubious	Dubious open reading frame; unlikely to encode a functional protein, based on available experimental and comparative sequence data; partially overlaps ENT1/YDL161W, a verified gene involved in endocytosis and actin cortical patch assembly
YDL163W	0	0	0.6795	0.679	0.39231	0.850921	0.463914	501.75	YDL163W	YDL163W		ORF	Dubious	Dubious open reading frame; unlikely to encode a functional protein, based on available experimental and comparative sequence data; partially overlaps the verified gene CDC9/YDL164C encoding DNA ligase
YDL164C	0.267	0.688	0.757	0.571	0.265236	0.813506	0.01155	4253.82	YDL164C	CDC9	DNA ligase (ATP) CDC9|MMS8	ORF	Verified	DNA ligase I found in nucleus and mitochondria; essential enzyme that joins Okazaki fragments during DNA replication; also acts in ribonucleotide excision repair, base excision repair, and recombination; DNA ligase I mutants trigger ubiquitination of PCNA at K107, facilitating Rad59p-mediated bypass of unligated Okazaki fragments; human homolog LIG1 can complement yeast cdc9 temperature-sensitive…
YDL165W	-0.406	0.0115	-0.4165	-0.27	0.244131	3.34885	0.066339	8514.43	YDL165W	CDC36	CCR4-NOT core subunit CDC36|NOT2|DNA19	ORF	Verified	Component of the CCR4-NOT core complex, involved in mRNA decapping; this complex has multiple roles in regulating mRNA levels including regulation of transcription and destabilizing mRNAs through deadenylation; basal transcription factor
YDL166C	1.1265	0.0715	0.1905	0.463	0.577824	2.69546	0.165634	4700.77	YDL166C	FAP7	nucleoside-triphosphatase	ORF	Verified	Essential NTPase required for small ribosome subunit synthesis; mediates processing of the 20S pre-rRNA at site D in the cytoplasm but associates only transiently with 43S preribosomes via Rps14p; complex with Rps14 is conserved between humans, yeast, and arches; may be the endonuclease for site D; depletion leads to accumulation of pre-40S ribosomes in 80S-like ribosomes; human TAF9 functionally…
YDL167C	0.1165	-0.1755	-0.05	-0.036	0.146479	113.024	0.641116	6397.47	YDL167C	NRP1		ORF	Verified	Putative RNA binding protein of unknown function; localizes to stress granules induced by glucose deprivation; predicted to be involved in ribosome biogenesis
YDL168W	-0.7955	-0.6505	-0.5905	-0.679	0.105396	0.228605	0.000951	16154.1	YDL168W	SFA1	bifunctional alcohol dehydrogenase/S-(hydroxymethyl)glutathione dehydrogenase|ADH5	ORF	Verified	Bifunctional alcohol dehydrogenase and formaldehyde dehydrogenase; formaldehyde dehydrogenase activity is glutathione-dependent; functions in formaldehyde detoxification and formation of long chain and complex alcohols, regulated by Hog1p-Sko1p; protein abundance increases in response to DNA replication stress
YDL169C	0.5625	0.5845	0.4835	0.544	0.0531131	0.179475	0.000221	51432.5	YDL169C	UGX2		ORF	Verified	Protein of unknown function; transcript accumulates in response to any combination of stress conditions
YDL170W	-0.5235	-0.035	0.29	-0.09	0.409479	50.553	0.673933	9564.04	YDL170W	UGA3		ORF	Verified	Transcriptional activator for GABA-dependent induction of GABA genes; binds to DNA elements found in the promoters of target genes and increases their expression in the presence of GABA (gamma-aminobutyrate); zinc finger transcription factor of the Zn(2)-Cys(6) binuclear cluster domain type; localized to the nucleus; examples of GABA genes include UGA1, UGA2, and UGA4
YDL171C	0.145	-0.3105	0.274	0.036	0.307073	236.939	0.839664	27908.3	YDL171C	GLT1	glutamate synthase (NADH)	ORF	Verified	NAD(+)-dependent glutamate synthase (GOGAT); synthesizes glutamate from glutamine and alpha-ketoglutarate; with Gln1p, forms the secondary pathway for glutamate biosynthesis from ammonia; expression regulated by nitrogen source; assembles into filaments as cells approach stationary phase and under cytosolic acidification and starvation conditions
YDL172C	-0.275	0	0.3525	0.144	0.314547	15.1691	0.730354	316.125	YDL172C	YDL172C		ORF	Dubious	Dubious open reading frame; unlikely to encode a functional protein, based on available experimental and comparative sequence data
YDL173W	-0.3495	-0.169	-0.1545	-0.224	0.10864	2.16517	0.018184	17051.3	YDL173W	PAR32		ORF	Verified	Protein of unknown function; hyperphosphorylated upon rapamycin treatment in a Tap42p-dependent manner; green fluorescent protein (GFP)-fusion protein localizes to the cytoplasm; PAR32 is not an essential gene
YDL174C	-0.5465	-0.4835	-0.4555	-0.495	0.0466083	0.190219	0.000459	50614.9	YDL174C	DLD1	D-lactate dehydrogenase	ORF	Verified	Major mitochondrial D-lactate dehydrogenase; oxidizes D-lactate to pyruvate, transcription is heme-dependent, repressed by glucose, and derepressed in ethanol or lactate; located in the mitochondrial inner membrane
YDL175C	0.5845	0.0305	-0.138	0.159	0.378002	14.952	0.420643	8723.88	YDL175C	AIR2	TRAMP complex RNA-binding subunit	ORF	Verified	RNA-binding subunit of the TRAMP nuclear RNA surveillance complex; involved in nuclear RNA processing and degradation; involved in TRAMP complex assembly as a bridge between Mtr4p and Trf4p; stimulates the poly(A) polymerase activity of Pap2p in vitro; has 5 zinc knuckle motifs; AIR2 has a paralog, AIR1, that arose from the whole genome duplication; Air2p and Air1p have nonredundant roles in regu…
YDL176W	0.0855	-0.296	0.08	-0.043	0.218689	118.274	0.721985	4448.56	YDL176W	YDL176W		ORF	Verified	Protein of unknown function; predicted by computational methods to be involved in fructose-1,6-bisphosphatase (Fbp1p) degradation; interacts with components of the GID complex; YDL176W is not an essential gene
YDL177C	1.357	0.765	0.5845	0.902	0.404104	0.496684	0.010141	1712.84	YDL177C	YDL177C		ORF	Uncharacterized	Putative protein of unknown function; similar to the mouse IMPACT gene; YDL177C is not an essential gene
YDL178W	0.4195	0.0895	-0.0645	0.148	0.247276	11.2891	0.339632	23182.4	YDL178W	DLD2	D-lactate dehydrogenase|AIP2	ORF	Verified	D-2-hydroxyglutarate dehydrogenase, and minor D-lactate dehydrogenase; mitochondrial matrix protein that oxidizes D-2-hydroxyglutarate (D-2HG), an oncometabolite, to alpha-ketoglutarate with a minor role in lactate catabolism; located in the mitochondrial matrix
YDL179W	0.587	0.646	0.468	0.567	0.0906697	0.282031	0.003933	3360.18	YDL179W	PCL9		ORF	Verified	Cyclin; forms a functional kinase complex with Pho85p cyclin-dependent kinase (Cdk), expressed in late M/early G1 phase, activated by Swi5p; PCL9 has a paralog, PCL2, that arose from the whole genome duplication
YDL180W	-0.006	-0.405	-0.1755	-0.196	0.20025	5.21268	0.112783	13594.2	YDL180W	YDL180W		ORF	Uncharacterized	Putative protein of unknown function; green fluorescent protein (GFP)-fusion protein localizes to the vacuole
YDL181W	-2.1635	-0.473	-0.981	-1.206	0.867387	0.596373	0.033441	2412.66	YDL181W	INH1	ATPase inhibitor	ORF	Verified	Protein that inhibits ATP hydrolysis by the F1F0-ATP synthase; inhibitory function is enhanced by stabilizing proteins Stf1p and Stf2p; has a calmodulin-binding motif and binds calmodulin in vitro; INH1 has a paralog, STF1, that arose from the whole genome duplication
YDL182W	-0.813	-1.616	-1.0695	-1.166	0.410135	0.301668	0.004397	9447.63	YDL182W	LYS20	homocitrate synthase LYS20	ORF	Verified	Homocitrate synthase isozyme and functions in DNA repair; catalyzes the condensation of acetyl-CoA and alpha-ketoglutarate to form homocitrate, which is the first step in the lysine biosynthesis pathway; LYS20 has a paralog, LYS21, that arose from the whole genome duplication
YDL183C	1.002	0.422	0.087	0.504	0.462934	1.82246	0.066394	1578.69	YDL183C	YDL183C	MKR1	ORF	Verified	Protein that may form an active mitochondrial KHE system; mitochondrial inner-membrane protein; non-essential gene; KHE system stands for K+/H+ exchanger system
YDL184C	-1.842	-1.129	-1.3815	-1.451	0.361521	0.171711	0.001484	1659.78	YDL184C	RPL41A	eL41|ribosomal 60S subunit protein L41A|L41e|YL41|L47A|L41A|RPL47A	ORF	Verified	Ribosomal 60S subunit protein L41A; comprises only 25 amino acids; rpl41a rpl41b double null mutant is viable; homologous to mammalian ribosomal protein L41, no bacterial homolog; RPL41A has a paralog, RPL41B, that arose from the whole genome duplication
YDL185C-A	0.074	0.774	0.149	0.332	0.384328	3.48679	0.150994	287.9	YDL185C-A	YDL185C-A		ORF	Dubious	Dubious open reading frame; unlikely to encode a functional protein, based on available experimental and comparative sequence data; partially overlaps the verified gene YDL185W; identified by homology with hemiascomycetous yeast species
YDL185W	-0.4475	0.1045	0.219	-0.041	0.356379	212.004	0.846923	22478.1	YDL185W	VMA1	H(+)-transporting V1 sector ATPase subunit A|TFP1|CLS8	ORF	Verified	Subunit A of the V1 peripheral membrane domain of V-ATPase; protein precursor undergoes self-catalyzed splicing to yield the extein Tfp1p and the intein Vde (PI-SceI), which is a site-specific endonuclease; the V1 peripheral membrane domain of the vacuolar H+-ATPase (V-ATPase) has eight subunits; involved in methionine restriction extension of chronological lifespan in an autophagy-dependent mann…
YDL186W	3.102	0	0.6175	1.446	1.64197	0.785289	0.324225	284.238	YDL186W	YDL186W		ORF	Uncharacterized	Putative protein of unknown function; YDL186W is not an essential gene
YDL187C	-0.5185	-0.373	-0.1075	-0.333	0.208399	1.87935	0.038647	822.221	YDL187C	YDL187C		ORF	Dubious	Dubious open reading frame; unlikely to encode a functional protein, based on available experimental and comparative sequence data
YDL188C	-1.274	-0.3085	-0.633	-0.738	0.49132	0.902094	0.029824	33145.6	YDL188C	PPH22	phosphoprotein phosphatase 2A catalytic subunit PPH22|PPH2	ORF	Verified	Catalytic subunit of protein phosphatase 2A (PP2A); functionally redundant with Pph21p; methylated at C terminus; forms alternate complexes with several regulatory subunits; involved in signal transduction and regulation of mitosis; protein abundance increases in response to DNA replication stress; dephosphorylates Tel1p/Mec1p-phosphorylated Cdc13p to promote telomerase release from telomeres at …
YDL189W	0.6745	0.4665	1.107	0.749	0.326742	0.582426	0.008594	5027.82	YDL189W	RBS1		ORF	Verified	Protein involved in assembly of the RNA polymerase III (Pol III) complex; high copy suppressor of Pol III assembly mutation and psk1 psk2 mutations that confer temperature-sensitivity for galactose utilization; physically interacts with Pol III; proposed to bind single-stranded nucleic acids via its R3H domain
YDL190C	-0.147	-0.179	-0.1215	-0.149	0.0288112	1.29774	0.04692	6593.35	YDL190C	UFD2	ubiquitin-ubiquitin ligase UFD2	ORF	Verified	Ubiquitin chain assembly factor (E4); cooperates with a ubiquitin-activating enzyme (E1), a ubiquitin-conjugating enzyme (E2), and a ubiquitin protein ligase (E3) to conjugate ubiquitin to substrates; also functions as an E3
YDL191W	-0.8265	-0.925	-1.5525	-1.101	0.393814	0.324875	0.004355	11320.5	YDL191W	RPL35A	uL29|ribosomal 60S subunit protein L35A|L35A|L29|SOS1	ORF	Verified	Ribosomal 60S subunit protein L35A; homologous to mammalian ribosomal protein L35 and bacterial L29; RPL35A has a paralog, RPL35B, that arose from the whole genome duplication
YDL192W	0.7155	-0.116	-0.391	0.069	0.576102	121.004	0.83448	9703.12	YDL192W	ARF1	Arf family GTPase ARF1	ORF	Verified	ADP-ribosylation factor; GTPase of the Ras superfamily involved in regulation of coated vesicle formation in intracellular trafficking within the Golgi; ARF1 has a paralog, ARF2, that arose from the whole genome duplication; arf1 arf2 double null mutation is complemented by human ARF1, ARF4, ARF5, or ARF6
YDL193W	-0.2415	-0.4705	-0.423	-0.378	0.120858	0.845845	0.017416	3787.94	YDL193W	NUS1	ditrans,polycis-polyprenyl diphosphate synthase	ORF	Verified	Forms dehydrodolichyl diphosphate syntase complex with RER2 or SRT1; tet-repressible mutant shows accumulation of hypoglycosylated forms of CPY, suggesting that Nus1p may be involved in protein trafficking; mutations in human homolog NUS1 have been implicated in congenital scoliosis, neurological impairment, refractory epilepsy, hearing deficit, and visual impairment; human cis-prenyltransferase …
YDL194W	-0.107	-0.13	-0.144	-0.127	0.0186815	1.15826	0.031701	56010.9	YDL194W	SNF3	glucose sensor	ORF	Verified	Plasma membrane low glucose sensor, regulates glucose transport; high affinity sensor that contains 12 predicted transmembrane segments and a long C-terminal tail required for induction of hexose transporters; also senses fructose and mannose; SNF3 has a paralog, RGT2, that arose from the whole genome duplication
YDL195W	-1.195	-0.5775	-0.7665	-0.846	0.316396	0.44207	0.00626	1923.56	YDL195W	SEC31	WEB1	ORF	Verified	Component of the Sec13p-Sec31p complex of the COPII vesicle coat; COPII coat is required for vesicle formation in ER to Golgi transport; mutant has increased aneuploidy tolerance
YDL196W	1.45	0	0.9495	1.116	0.736495	0.591346	0.161008	298.206	YDL196W	YDL196W		ORF	Dubious	Dubious open reading frame; unlikely to encode a functional protein, based on available experimental and comparative sequence data; open reading frame is located in promoter region of essential gene SEC31
YDL197C	-0.4225	0.219	0.13	-0.025	0.347539	556.062	0.913439	6803.65	YDL197C	ASF2		ORF	Verified	Anti-silencing protein; causes derepression of silent loci when overexpressed
YDL198C	0.8025	0.2015	0.8135	0.606	0.350206	0.953627	0.026897	46818	YDL198C	GGC1	SHM1|YHM1	ORF	Verified	Mitochondrial GTP/GDP transporter; essential for mitochondrial genome maintenance; has a role in mitochondrial iron transport; member of the mitochondrial carrier family
YDL199C	-0.958	-0.188	-0.3455	-0.497	0.406789	1.64686	0.055578	3413.31	YDL199C	YDL199C		ORF	Uncharacterized	Putative transporter; member of the sugar porter family
YDL200C	0.112	-0.419	-1.044	-0.45	0.578637	2.85746	0.149224	2208.34	YDL200C	MGT1	methylated-DNA--protein-cysteine methyltransferase|MGMT	ORF	Verified	DNA repair methyltransferase (6-O-methylguanine-DNA methylase); involved in protection against DNA alkylation damage
YDL201W	0.6145	-0.1105	-0.018	0.162	0.394596	15.0357	0.415333	23204.5	YDL201W	TRM8	tRNA (guanine46-N7)-methyltransferase	ORF	Verified	Noncatalytic subunit of a tRNA methyltransferase complex; Trm8p and Trm82p comprise an enzyme that catalyzes a methyl-transfer from S-adenosyl-l-methionine to the N(7) atom of guanine at position 46 in tRNA; Trm8 lacks catalytic activity if not bound to Trm82p
YDL202W	0.761	0.776	0.5145	0.684	0.146839	0.313854	0.001824	11133.8	YDL202W	MRPL11	mitochondrial 54S ribosomal protein YmL11|YmL11	ORF	Verified	Mitochondrial ribosomal protein of the large subunit; localizes to vacuole in response to H2O2
YDL203C	-0.2905	-0.007	0.3215	0.008	0.306276	4785.56	0.979454	13175.6	YDL203C	ACK1		ORF	Verified	Protein that functions in the cell wall integrity pathway; functions upstream of Pkc1p; GFP-fusion protein expression is induced in response to the DNA-damaging agent MMS; non-tagged Ack1p is detected in purified mitochondria
YDL204W	-3.171	-0.945	-1.428	-1.848	1.17093	0.342867	0.022838	23337.7	YDL204W	RTN2		ORF	Verified	Reticulon protein; involved in nuclear pore assembly and maintenance of tubular ER morphology; promotes membrane curvature; regulates the ER asymmetry-induced inheritance block during ER stress; role in ER-derived peroxisomal biogenesis; interacts with Sec6p, Yip3p, and Sbh1p; less abundant than RTN1; member of RTNLA (reticulon-like A) subfamily; protein increases in abundance and relocalizes to …
YDL205C	-3.7215	-1.3195	-1.0605	-2.034	1.46729	0.354661	0.03379	4883.52	YDL205C	HEM3	hydroxymethylbilane synthase|OLE2	ORF	Verified	Porphobilinogen deaminase; catalyzes the conversion of 4-porphobilinogen to hydroxymethylbilane, the third step in heme biosynthesis; localizes to the cytoplasm and nucleus; expression is regulated by Hap2p-Hap3p, but not by levels of heme; human homolog HMBS can complement yeast mutant and allow growth of haploid null after sporulation of a heterozygous diploid
YDL206W	-0.483	-0.3715	-0.8635	-0.573	0.257965	0.785691	0.009365	7548.71	YDL206W	YDL206W		ORF	Uncharacterized	Putative protein of unknown function; YDL206W is not an essential protein
YDL207W	0.1325	0.2945	0.431	0.286	0.149431	1.82688	0.01314	12151.1	YDL207W	GLE1	nucleoporin GLE1|NLE2|BRR3|RSS1	ORF	Verified	Cytoplasmic nucleoporin required for polyadenylated mRNA export; contains a nuclear export signal; when bound to inositol hexakisphosphate (IP6), functions as an activator for the Dbp5p ATPase activity at the nuclear pore complex during mRNA export; mediates translation initiation; required for efficient translation termination
YDL208W	0.709	-0.2385	-0.242	0.076	0.548053	94.8844	0.807929	24065.2	YDL208W	NHP2	snoRNA-binding protein NHP2	ORF	Verified	Protein related to mammalian high mobility group (HMG) proteins; nuclear protein; essential for function of H/ACA-type snoRNPs, which are involved in 18S rRNA processing
YDL209C	0.239	0.348	0.7555	0.447	0.272247	1.36253	0.020537	1995.16	YDL209C	CWC2	NTC40	ORF	Verified	Member of the NineTeen Complex (NTC); this complex contains Prp19p and stabilizes U6 snRNA in catalytic forms of the spliceosome containing U2, U5, and U6 snRNAs; binds directly to U6 snRNA; similar to S. pombe Cwf2
YDL210W	-0.677	-0.887	0.96	-0.201	1.01121	25.0293	0.703946	11454.8	YDL210W	UGA4		ORF	Verified	GABA (gamma-aminobutyrate) permease; serves as a GABA transport protein involved in the utilization of GABA as a nitrogen source; catalyzes the transport of putrescine and delta-aminolevulinic acid (ALA); localized to the vacuolar membrane
YDL211C	2.3755	1.3775	1.5625	1.772	0.530911	0.169081	0.002501	1564.85	YDL211C	YDL211C		ORF	Uncharacterized	Protein of unknown function; green fluorescent protein (GFP)-fusion protein localizes to the vacuole; YDL211C has a paralog, TDA7, that arose from the whole genome duplication
YDL212W	1.1425	0.444	-0.034	0.517	0.591684	2.21365	0.112982	3644.13	YDL212W	SHR3	APF1	ORF	Verified	Endoplasmic reticulum packaging chaperone; required for incorporation of amino acid permeases into COPII coated vesicles for transport to the cell surface
YDL213C	0.46	-0.3165	-0.281	-0.046	0.438424	207.195	0.859291	3784.43	YDL213C	NOP6		ORF	Verified	rRNA-binding protein required for 40S ribosomal subunit biogenesis; contains an RNA recognition motif (RRM); hydrophilin essential to overcome the stress of the desiccation-rehydration process; NOP6 may be a fungal-specific gene as no homologs have been yet identified in higher eukaryotes
YDL214C	0.081	0.3225	-0.751	-0.116	0.563168	41.8525	0.693659	7778.27	YDL214C	PRR2	serine/threonine protein kinase PRR2	ORF	Verified	Serine/threonine protein kinase; inhibits pheromone induced signalling downstream of MAPK, possibly at the level of the Ste12p transcription factor; mutant has increased aneuploidy tolerance; PRR2 has a paralog, NPR1, that arose from the whole genome duplication
YDL215C	0.759	1.004	1.7495	1.171	0.515895	0.376225	0.009214	43311.5	YDL215C	GDH2	glutamate dehydrogenase (NAD(+))|GDHB|GDH-B	ORF	Verified	NAD(+)-dependent glutamate dehydrogenase; degrades glutamate to ammonia and alpha-ketoglutarate; expression sensitive to nitrogen catabolite repression and intracellular ammonia levels; genetically interacts with GDH3 by suppressing stress-induced apoptosis
YDL216C	-0.125	-0.079	-0.443	-0.216	0.198215	4.24844	0.082615	13144.3	YDL216C	RRI1	COP9 signalosome catalytic subunit RRI1|JAB1|CSN5	ORF	Verified	Catalytic subunit of the COP9 signalosome (CSN) complex; acts as an isopeptidase in cleaving the ubiquitin-like protein Nedd8 from SCF ubiquitin ligases; metalloendopeptidase involved in the adaptation to pheromone signaling; involved in modulation of genes controlling amino acid and lipid metabolism, and ergosterol biosynthesis
YDL217C	0.8685	0.349	0.5755	0.598	0.260458	0.728343	0.010269	4848.1	YDL217C	TIM22	translocation channel protein TIM22	ORF	Verified	Essential core component of the mitochondrial TIM22 complex; involved in insertion of polytopic proteins into the inner membrane; forms the channel through which proteins are imported
YDL218W	-1.549	-0.816	-0.761	-1.042	0.439935	0.405185	0.006985	6591.18	YDL218W	YDL218W		ORF	Uncharacterized	Putative protein of unknown function; YDL218W transcription is regulated by Azf1p and induced by starvation and aerobic conditions; expression also induced in cells treated with the mycotoxin patulin
YDL219W	0.737	0.0755	0.2845	0.366	0.338137	2.52424	0.155045	597.118	YDL219W	DTD1	D-tyrosyl-tRNA(Tyr) deacylase	ORF	Verified	D-Tyr-tRNA(Tyr) deacylase; functions in protein translation, may affect nonsense suppression via alteration of the protein synthesis machinery; ubiquitous among eukaryotes
YDL220C	-0.858	0.1375	0.2165	-0.168	0.598862	21.2182	0.59567	627.265	YDL220C	CDC13	telomere-binding protein CDC13|EST4	ORF	Verified	Single stranded DNA-binding protein found at TG1-3 telomere G-tails; key roles in regulation of telomerase, telomere end protection, conventional telomere replication; regulates telomere replication through recruitment of specific sub-complexes, essential function is telomere capping; forms homodimer via N-terminus; disruption of dimerization leads to short telomeres; autophagy and proteasome are…
YDL221W	1.306	0.8965	0.5505	0.84	0.378195	0.53599	0.021586	363.185	YDL221W	YDL221W		ORF	Dubious	Dubious open reading frame; unlikely to encode a functional protein, based on available experimental and comparative sequence data; partially overlaps the 3' end of essential gene CDC13
YDL222C	-4.518	-2.149	-1.734	-2.8	1.50195	0.191575	0.014158	21551.7	YDL222C	FMP45		ORF	Verified	Integral membrane protein localized to mitochondria; required for sporulation and maintaining sphingolipid content; similar to SUR7; FMP45 has a paralog, YNL194C, that arose from the whole genome duplication
YDL223C	-3.662	-1.7995	-1.533	-2.332	1.15993	0.213291	0.01155	39407.2	YDL223C	HBT1		ORF	Verified	Shmoo tip protein, substrate of Hub1p ubiquitin-like protein; mutants are defective for mating projection formation, thereby implicating Hbt1p in polarized cell morphogenesis; HBT1 has a paralog, YNL195C, that arose from the whole genome duplication
YDL224C	-0.749	-0.164	0.0835	-0.276	0.4275	5.612	0.231883	5939.81	YDL224C	WHI4		ORF	Verified	Putative RNA binding protein; regulates the cell size requirement for passage through Start and commitment to cell division; WHI4 has a paralog, WHI3, that arose from the whole genome duplication
YDL225W	-0.3245	-0.058	0.355	-0.009	0.342372	4226.81	0.980656	791.265	YDL225W	SHS1	septin SHS1|SEP7	ORF	Verified	Component of the septin ring that is required for cytokinesis; present at the ends of rod-like septin hetero-oligomers; C-terminal extension is important for recruitment of Bni5p to the mother-bud neck, which in turn is required for Myo1p recruitment and cytokinesis; undergoes sumoylation and phosphorylation during mitosis; protein abundance increases in response to DNA replication stress
YDL226C	0.0975	0.419	0.671	0.396	0.287451	1.83305	0.036567	16406.9	YDL226C	GCS1		ORF	Verified	ADP-ribosylation factor GTPase activating protein (ARF GAP); involved in ER-Golgi transport; required for prospore membrane formation; regulates phospholipase Spo14p; shares functional similarity with Glo3p; GCS1 has a paralog, SPS18, that arose from the whole genome duplication
YDL227C	0.8275	-0.3725	0.176	0.21	0.600736	13.6221	0.509137	1788.69	YDL227C	HO		ORF	Verified	Site-specific endonuclease; required for gene conversion at the MAT locus (homothallic switching) through the generation of a ds DNA break; expression restricted to mother cells in late G1 as controlled by Swi4p-Swi6p, Swi5p, and Ash1p
YDL228C	0.3885	-0.333	-0.6315	-0.192	0.524415	14.2257	0.593065	332.74	YDL228C	YDL228C		ORF	Dubious	Dubious open reading frame; unlikely to encode a functional protein, based on available experimental and comparative sequence data; almost completely overlaps the verified gene SSB1
YDL229W	-0.9515	-1.0875	-0.995	-1.011	0.0694556	0.0679524	0.00081	49691.8	YDL229W	SSB1	Hsp70 family ATPase SSB1|YG101	ORF	Verified	Cytoplasmic ATPase that is a ribosome-associated molecular chaperone; functions with J-protein partner Zuo1p; may be involved in folding of newly-made polypeptide chains; member of the HSP70 family; interacts with phosphatase subunit Reg1p; SSB1 has a paralog, SSB2, that arose from the whole genome duplication
YDL230W	-0.2585	-0.217	-0.29	-0.255	0.036614	0.563075	0.001667	11378.7	YDL230W	PTP1	tyrosine protein phosphatase PTP1	ORF	Verified	Phosphotyrosine-specific protein phosphatase; dephosphorylates a broad range of substrates in vivo, including Fpr3p; localized to the cytoplasm and the mitochondria; proposed to be a negative regulator of filamentation
YDL231C	0.017	0.231	0.5615	0.27	0.274319	3.76295	0.08902	51718.1	YDL231C	BRE4		ORF	Verified	Zinc finger protein containing five transmembrane domains; null mutant exhibits strongly fragmented vacuoles and sensitivity to brefeldin A, a drug which is known to affect intracellular transport
YDL232W	-1.393	-1.2165	-1.3285	-1.313	0.0893089	0.0518042	0.000468	4045.25	YDL232W	OST4	olichyl-diphosphooligosaccharide--protein glycotransferase OST4	ORF	Verified	Subunit of the oligosaccharyltransferase complex of the ER lumen; complex catalyzes protein asparagine-linked glycosylation; type I membrane protein required for incorporation of Ost3p or Ost6p into the OST complex
YDL233W	-0.7065	-0.4525	-0.4525	-0.537	0.146647	0.508539	0.003743	6376.6	YDL233W	MFG1		ORF	Uncharacterized	Regulator of filamentous growth; interacts with FLO11 promoter and regulates FLO11 expression; binds to transcription factors Flo8p and Mss11p; green fluorescent protein (GFP)-fusion protein localizes to the nucleus; YDL233W is not an essential gene
YDL234C	-0.879	-0.1185	-0.2985	-0.432	0.397438	2.12962	0.066662	12871.3	YDL234C	GYP7		ORF	Verified	GTPase-activating protein for yeast Rab family members; members include Ypt7p (most effective), Ypt1p, Ypt31p, and Ypt32p (in vitro); involved in vesicle mediated protein trafficking; contains a PH-like domain
YDL235C	0.2135	-0.457	-0.8165	-0.353	0.522767	4.19526	0.199286	3895.53	YDL235C	YPD1		ORF	Verified	Osmotic stress-responsive phosphorelay intermediate sensor protein; phosphorylated by the plasma membrane sensor Sln1p in response to osmotic stress and then in turn phosphorylates the response regulators Ssk1p in the cytosol and Skn7p in the nucleus
YDL236W	0.9075	0.141	0.03	0.36	0.477816	3.68685	0.158854	9280.28	YDL236W	PHO13	4-nitrophenylphosphatase	ORF	Verified	Conserved phosphatase acting as a metabolite repair enzyme; shows specific dephosphorylating activity on two side-products of central carbohydrate metabolism, 2-phosphoglycolate and 4-phosphoerythronate; alkaline phosphatase specific for p-nitrophenyl phosphate; also has protein phosphatase activity; human ortholog PGP shows similar substrate specificity, deletion causes similar metabolite accumu…
YDL237W	0	-0.11	-0.3375	-0.149	0.172125	7.75304	0.151919	33819.9	YDL237W	AIM6	LRC1	ORF	Verified	Protein of unknown function; required for respiratory growth; YDL237W is not an essential gene
YDL238C	0.73	0.798	0.412	0.647	0.206052	0.49223	0.003754	5144.82	YDL238C	GUD1	guanine deaminase	ORF	Verified	Guanine deaminase; a catabolic enzyme of the guanine salvage pathway producing xanthine and ammonia from guanine; activity is low in exponentially-growing cultures but expression is increased in post-diauxic and stationary-phase cultures
YDL239C	-1.2055	0.4205	0.538	-0.082	0.974463	144.923	0.885275	6566.57	YDL239C	ADY3		ORF	Verified	Protein required for spore wall formation; subunit of the leading edge protein (LEP) complex (Ssp1-Ady3-Don1-Irc10) that forms a ring-like structure at the leading edge of the prospore membrane during meiosis II; mediates assembly of the LEP complex, formation of the ring-like structure via interaction with spindle pole body components and prospore membrane maturation; potentially phosphorylated …
YDL240C-A	2.592	0	0.3485	1.096	1.40672	1.17108	0.384262	1462.95	YDL240C-A	YDL240C-A		ORF	Dubious	Dubious open reading frame; unlikely to encode a functional protein, based on available experimental and comparative sequence data; identified by sequence comparison with hemiascomycetous yeast species
YDL240W	-0.544	0.484	0.4435	0.128	0.582177	35.5333	0.672996	1856.37	YDL240W	LRG1		ORF	Verified	GTPase-activating protein (GAP); contains Rho1p-specific GAP activity, interacting with activated forms of Rho1p; functions along with Sac7p as a negative regulator of the Pkc1p-mediated cell wall integrity signaling pathway; negative regulator of cell wall 1,3-beta-glucan biosynthesis; required for efficient cell fusion; contains a RhoGAP domain and three Lin-11-Isl1-Mec-3 (LIM) domains
YDL241W	0.6175	0.0255	-0.0235	0.206	0.356779	8.40745	0.340606	420.97	YDL241W	YDL241W		ORF	Uncharacterized	Putative protein of unknown function; SWAT-GFP and mCherry fusion proteins localize to the endoplasmic reticulum; YDL241W is not an essential gene
YDL242W	0	0	-0.0885	-0.089	0.0510955	6.45064	0.356351	483.143	YDL242W	YDL242W		ORF	Uncharacterized	Putative protein of unknown function; conserved across S. cerevisiae strains
YDL243C	-0.2945	0.464	0.1575	0.109	0.381569	32.1159	0.692762	1205.63	YDL243C	AAD4	putative aryl-alcohol dehydrogenase	ORF	Verified	Putative aryl-alcohol dehydrogenase; involved in oxidative stress response; similar to P. chrysosporium aryl-alcohol dehydrogenase; expression induced in cells treated with the mycotoxin patulin; members of the AAD gene family comprise three pairs (AAD3 + AAD15, AAD6/AAD16 + AAD4, AAD10 + AAD14) whose two genes are more related to one another than to other members of the family
YDL244W	0.122	-0.51	-0.004	-0.181	0.334499	10.2103	0.46297	276.37	YDL244W	THI13	4-amino-5-hydroxymethyl-2-methylpyrimidine phosphate synthase	ORF	Verified	Protein involved in synthesis of the thiamine precursor HMP; member of a subtelomeric gene family including THI5, THI11, THI12, and THI13; hydroxymethylpyrimidine is also known as HMP
YDL245C	0.26	2.706	0.518	1.001	1.34393	1.34124	0.263313	579.571	YDL245C	HXT15	HLT2|hexose transporter HXT15	ORF	Verified	Putative transmembrane polyol transporter; supports growth on and uptake of mannitol, sorbitol and xylitol with moderate affinity when overexpressed in a strain deleted for hexose family members; minor hexose transport activity when overexpressed in a similar strain; similarity to hexose transporters; expression is induced by low levels of glucose and repressed by high levels of glucose
YDL246C	-0.091	0.74	0.6055	0.418	0.44605	2.55288	0.11007	892.662	YDL246C	SOR2	L-iditol 2-dehydrogenase SOR2	ORF	Verified	Sorbitol dehydrogenase; protein sequence is 99% identical to the Sor1p sorbitol dehydrogenase
YDL247W	-0.397	-0.156	-0.1015	-0.218	0.157253	3.30892	0.038672	1552.28	YDL247W	MPH2	alpha-glucoside permease	ORF	Verified	Alpha-glucoside permease; transports maltose, maltotriose, alpha-methylglucoside, and turanose; almost identical to Mph3p; encoded in a subtelomeric position in a region likely to have undergone duplication
YDL247W-A	-0.476	0.1825	-0.2205	-0.171	0.331992	11.3536	0.330704	937.426	YDL247W-A	YDL247W-A		ORF	Dubious	Dubious open reading frame; unlikely to encode a functional protein, based on available experimental and comparative sequence data; identified by sequence comparison with hemiascomycetous yeast species
YDL248W	-1.0775	-0.0405	-0.413	-0.51	0.525307	2.01964	0.088999	1471.64	YDL248W	COS7		ORF	Verified	Endosomal protein involved in turnover of plasma membrane proteins; member of the DUP380 subfamily of conserved, often subtelomeric COS genes; required for the multivesicular vesicle body sorting pathway that internalizes plasma membrane proteins for degradation; Cos proteins provide ubiquitin in trans for nonubiquitinated cargo proteins; the authentic, non-tagged protein is detected in highly pu…
YDR001C	-0.2645	-0.341	-0.2855	-0.297	0.0395253	0.448087	0.001688	60474.2	YDR001C	NTH1	alpha,alpha-trehalase NTH1	ORF	Verified	Neutral trehalase, degrades trehalose; required for thermotolerance and may mediate resistance to other cellular stresses; phosphorylated and activated by Cdc28p at the G1/S phase transition to coordinately regulate carbohydrate metabolism and the cell cycle; inhibited by Dcs1p; NTH1 has a paralog, NTH2, that arose from the whole genome duplication
YDR002W	-0.01	-0.1565	0.114	-0.018	0.135406	417.919	0.905531	46592	YDR002W	YRB1	Ran GTPase-binding protein YRB1|STP52|SFO1|HTN1|CST20	ORF	Verified	Ran GTPase binding protein; involved in nuclear protein import and RNA export, ubiquitin-mediated protein degradation during the cell cycle; shuttles between the nucleus and cytoplasm; is essential; homolog of human RanBP1
YDR003W	-0.5105	0.193	-0.0025	-0.107	0.363134	31.7175	0.563452	56462.4	YDR003W	RCR2	SSH5	ORF	Verified	Vacuolar protein; presumably functions within the endosomal-vacuolar trafficking pathway, affecting events that determine whether plasma membrane proteins are degraded or routed to the plasma membrane; RCR2 has a paralog, RCR1, that arose from the whole genome duplication
YDR004W	-0.666	-0.203	-0.3715	-0.414	0.23434	1.36724	0.019559	3647.74	YDR004W	RAD57	putative DNA-dependent ATPase RAD57	ORF	Verified	Protein that stimulates strand exchange; stimulates strand exchange by stabilizing the binding of Rad51p to single-stranded DNA; involved in the recombinational repair of double-strand breaks in DNA during vegetative growth and meiosis; forms heterodimer with Rad55p
YDR005C	-0.2515	0.1515	0.3595	0.087	0.310643	41.0415	0.599248	37923.9	YDR005C	MAF1	RNA polymerase III-inhibiting protein MAF1	ORF	Verified	Highly conserved negative regulator of RNA polymerase III; involved in tRNA processing and stability; inhibits tRNA degradation via rapid tRNA decay (RTD) pathway; binds N-terminal domain of Rpc160p subunit of Pol III to prevent closed-complex formation; regulated by phosphorylation mediated by TORC1, protein kinase A, Sch9p, casein kinase 2; localizes to cytoplasm during vegetative growth and tr…
YDR006C	-0.932	-0.466	-0.1805	-0.526	0.379346	1.37108	0.035853	37294.5	YDR006C	SOK1		ORF	Verified	Protein of unknown function; overexpression suppresses the growth defect of mutants lacking protein kinase A activity; involved in cAMP-mediated signaling; localized to the nucleus; similar to the mouse testis-specific protein PBS13
YDR007W	-0.0825	-0.626	-0.6135	-0.441	0.310244	1.59524	0.039793	1997	YDR007W	TRP1	phosphoribosylanthranilate isomerase TRP1	ORF	Verified	Phosphoribosylanthranilate isomerase; catalyzes the third step in tryptophan biosynthesis; in 2004, the sequence of TRP1 from strain S228C was updated by changing the previously annotated internal STOP (TAA) to serine (TCA); enhances vegetative growth at low and high temperatures when used as an auxotrophic marker in strains such as W303
YDR008C	0	0	-1.808	-1.808	1.04385	0.319331	1	249.792	YDR008C	YDR008C		ORF	Dubious	Dubious open reading frame; unlikely to encode a functional protein, based on available experimental and comparative sequence data; partially overlaps TRP1/YDR007W on opposite strand
YDR009W	-0.097	-0.1655	-0.058	-0.107	0.0544204	4.75329	0.047421	1743.19	YDR009W	GAL3	transcriptional regulator GAL3	ORF	Verified	Transcriptional regulator; involved in activation of the GAL genes in response to galactose; forms a complex with Gal80p to relieve Gal80p inhibition of Gal4p; binds galactose and ATP but does not have galactokinase activity; GAL3 has a paralog, GAL1, that arose from the whole genome duplication
YDR010C	0.392	1.1945	1.284	0.957	0.491203	0.536336	0.012634	2508.13	YDR010C	YDR010C		ORF	Dubious	Dubious open reading frame; unlikely to encode a functional protein, based on available experimental and comparative sequence data
YDR011W	-2.4175	-1.8205	-1.768	-2.002	0.36079	0.0900173	0.00073	39187.4	YDR011W	SNQ2	ATP-binding cassette transporter SNQ2	ORF	Verified	Plasma membrane ATP-binding cassette (ABC) transporter; multidrug transporter involved in multidrug resistance and resistance to singlet oxygen species
YDR012W	-0.845	-0.469	-0.33	-0.548	0.266434	0.887214	0.034317	45501.4	YDR012W	RPL4B	uL4|ribosomal 60S subunit protein L4B|L4|rp2|YL2|L4B|L2B	ORF	Verified	Ribosomal 60S subunit protein L4B; homologous to mammalian ribosomal protein L4 and bacterial L4; RPL4B has a paralog, RPL4A, that arose from the whole genome duplication
YDR013W	-1.0515	-1.747	-1.3145	-1.371	0.351176	0.186831	0.003522	563.097	YDR013W	PSF1	DNA replication protein PSF1|CDC101	ORF	Verified	Subunit of the GINS complex (Sld5p, Psf1p, Psf2p, Psf3p); complex is localized to DNA replication origins and implicated in assembly of the DNA replication machinery
YDR014W	-1.028	-0.1965	-0.099	-0.441	0.510545	2.62517	0.118849	1749.65	YDR014W	RAD61	WPL1	ORF	Verified	Subunit of a complex that inhibits sister chromatid cohesion; also negatively regulates chromosome condensation; inhibited by Eco1p-acetylated cohesin subunits Smc3p and Mcd1p; binds Smc3p ATPase head of cohesin; related to the human Wapl protein that controls the association of cohesin with chromatin
YDR015C	2.676	0	1.139	1.651	1.34292	0.492671	0.149438	239.846	YDR015C	YDR015C		ORF	Dubious	Dubious open reading frame; unlikely to encode a functional protein, based on available experimental and comparative sequence data; overlaps the verified gene HED1/YDR014W-A
YDR016C	0.112	0.011	-0.8265	-0.235	0.515168	9.32853	0.375645	805.588	YDR016C	DAD1		ORF	Verified	Essential subunit of the Dam1 complex (aka DASH complex); complex couples kinetochores to the force produced by MT depolymerization thereby aiding in chromosome segregation; is transferred to the kinetochore prior to mitosis
YDR017C	-0.1615	-0.024	0.056	-0.043	0.110009	59.4967	0.632626	2100.4	YDR017C	KCS1	inositol polyphosphate kinase KCS1	ORF	Verified	Inositol hexakisphosphate and inositol heptakisphosphate kinase; generation of high energy inositol pyrophosphates by Kcs1p is required for many processes such as vacuolar biogenesis, stress response, RNA polymerase I-mediated rRNA transcription and telomere maintenance; inositol hexakisphosphate is also known as IP6; inositol heptakisphosphate is also known as IP7
YDR018C	-0.6315	-0.1115	-0.1775	-0.307	0.2831	3.00374	0.073236	2815.29	YDR018C	YDR018C	putative acyltransferase	ORF	Uncharacterized	Probable membrane protein with three predicted transmembrane domains; similar to C. elegans F55A11.5 and maize 1-acyl-glycerol-3-phosphate acyltransferase; YDR018C has a paralog, CST26, that arose from the whole genome duplication
YDR019C	-2.1125	-1.952	-1.3915	-1.819	0.378541	0.114406	0.001348	8563.46	YDR019C	GCV1	glycine decarboxylase subunit T|GSD1	ORF	Verified	T subunit of the mitochondrial glycine decarboxylase complex; glycine decarboxylase is required for the catabolism of glycine to 5,10-methylene-THF; expression is regulated by levels of levels of 5,10-methylene-THF in the cytoplasm
YDR020C	0.047	0.051	0.2955	0.131	0.142331	8.29386	0.111533	1294.22	YDR020C	DAS2	putative uridine kinase DAS2|RRT3	ORF	Uncharacterized	Putative protein of unknown function; non-essential gene identified in a screen for mutants with increased levels of rDNA transcription; weak similarity with uridine kinases and with phosphoribokinases
YDR021W	0.268	-0.618	-0.299	-0.216	0.448748	9.61822	0.381702	2216.68	YDR021W	FAL1	ATP-dependent RNA helicase FAL1	ORF	Verified	Nucleolar protein required for maturation of 18S rRNA; member of the eIF4A subfamily of DEAD-box ATP-dependent RNA helicases; 18S rRNA biogenesis defect of the null mutant is functionally complemented by human EIF4A3
YDR022C	0.7375	0.554	0.1345	0.475	0.309101	1.36998	0.029694	4524.72	YDR022C	ATG31	CIS1	ORF	Verified	Autophagy-specific protein required for autophagosome formation; forms a complex with Atg17p and Atg29p that localizes other proteins to the pre-autophagosomal structure; constitutively phosphorylated, and phosphorylation of residue S174 is required for function; high-copy suppressor of CIK1 deletion
YDR023W	-0.08	0.0145	-0.148	-0.071	0.0816093	16.1891	0.129357	26420.5	YDR023W	SES1	serine--tRNA ligase SES1|SerRS	ORF	Verified	Cytosolic seryl-tRNA synthetase; class II aminoacyl-tRNA synthetase that aminoacylates tRNA(Ser), displays tRNA-dependent amino acid recognition which enhances discrimination of the serine substrate, interacts with peroxin Pex21p
YDR024W	0	0	1.667	1.667	0.962443	0.346341	1	302.409	YDR024W	FYV1		ORF	Dubious	Dubious open reading frame; unlikely to encode a functional protein, based on available experimental and comparative sequence data; not conserved in closely related Saccharomyces species; mutation decreases survival upon exposure to K1 killer toxin
YDR025W	-0.117	-0.6805	-0.4705	-0.423	0.284779	1.59158	0.030203	10584.4	YDR025W	RPS11A	uS17|ribosomal 40S subunit protein S11A|S17|rp41A|YS12|S18A|S11A	ORF	Verified	Protein component of the small (40S) ribosomal subunit; homologous to mammalian ribosomal protein S11 and bacterial S17; N-terminally propionylated in vivo; RPS11A has a paralog, RPS11B, that arose from the whole genome duplication
YDR026C	0.777	0.3655	0.7235	0.622	0.22374	0.578314	0.008135	26026.6	YDR026C	NSI1	YTT1	ORF	Verified	RNA polymerase I termination factor; binds to rDNA terminator element, required for efficient Pol I termination; required for rDNA silencing at NTS1; facilities association of Sir2p with NTS1, contributes to rDNA stability and cell longevity; interacts physically with Fob1p and RENT subunits, Sir2p and Net1p; may interact with ribosomes, based on co-purification experiments; Myb-like DNA-binding …
YDR027C	-0.4305	-0.371	-0.4115	-0.404	0.0303905	0.186198	0.00013	3349.47	YDR027C	VPS54	TCS3|CGP1|LUV1	ORF	Verified	Component of the GARP (Golgi-associated retrograde protein) complex; GARP is required for the recycling of proteins from endosomes to the late Golgi, and for mitosis after DNA damage induced checkpoint arrest; potentially phosphorylated by Cdc28p; members of the GARP complex are Vps51p-Vps52p-Vps53p-Vps54p
YDR028C	0.112	0.4505	0.333	0.299	0.171867	1.92243	0.068014	27668.7	YDR028C	REG1	protein phosphatase regulator REG1|SRN1|SPP43|PZF240|HEX2	ORF	Verified	Regulatory subunit of type 1 protein phosphatase Glc7p; involved in negative regulation of glucose-repressible genes; involved in regulation of the nucleocytoplasmic shuttling of Hxk2p; REG1 has a paralog, REG2, that arose from the whole genome duplication
YDR029W	0	0	0.1445	0.144	0.0834271	4.0233	0.621873	246.563	YDR029W	YDR029W		ORF	Uncharacterized	Putative protein of unknown function; conserved among S. cerevisiae strains; YDR029W is not an essential gene
YDR030C	0.279	0.3575	0.2635	0.3	0.0503959	0.559955	0.016041	6517.57	YDR030C	RAD28		ORF	Verified	Protein involved in DNA repair; related to the human CSA protein that is involved in transcription-coupled repair nucleotide excision repair
YDR031W	0.9845	0.621	-0.2005	0.468	0.607072	2.77172	0.165208	3754.31	YDR031W	MIX14	MIC14	ORF	Verified	Mitochondrial intermembrane space protein of unknown function; required for normal oxygen consumption; contains twin cysteine-x9-cysteine motifs; protein abundance increases in response to DNA replication stress
YDR032C	0.267	0.362	0.346	0.325	0.0508626	0.481539	0.004427	56913.5	YDR032C	PST2	flavodoxin-like fold family protein	ORF	Verified	Protein with similarity to a family of flavodoxin-like proteins; induced by oxidative stress in a Yap1p dependent manner; the authentic, non-tagged protein is detected in highly purified mitochondria in high-throughput studies; protein abundance increases in response to DNA replication stress; PST2 has a paralog, RFS1, that arose from the whole genome duplication
YDR033W	-2.6745	-1.6805	-1.5515	-1.969	0.61452	0.158505	0.003064	40350.3	YDR033W	MRH1		ORF	Verified	Protein that localizes primarily to the plasma membrane; also found at the nuclear envelope; long-lived protein that is asymmetrically retained in the plasma membrane of mother cells; the authentic, non-tagged protein is detected in mitochondria in a phosphorylated state; null mutation confers sensitivity to acetic acid
YDR034C	-0.736	-0.461	-0.472	-0.556	0.155693	0.503639	0.00251	15101.7	YDR034C	LYS14		ORF	Verified	Transcriptional activator involved in regulating lysine biosynthesis; involved in the regulation of genes of the lysine biosynthesis pathway; requires 2-aminoadipate semialdehyde as co-inducer
YDR034C-A	2.009	0	0	2.009	1.1599	0.287382	1	213.607	YDR034C-A	YDR034C-A		ORF	Uncharacterized	Putative protein of unknown function; contained within the solo Ty1 LTR element YDRWdelta7
YDR034W-B	-0.742	-0.886	-1.2995	-0.976	0.289403	0.303811	0.004281	8245.38	YDR034W-B	YDR034W-B		ORF	Uncharacterized	Predicted tail-anchored plasma membrane protein; contains conserved CYSTM module; related proteins in other organisms may be involved in response to stress; N- and C-terminal fusion proteins localize to the cell periphery; YDR034W-B has a paralog, YBR056W-A, that arose from the whole genome duplication
YDR035W	-0.756	-0.013	0.0555	-0.238	0.450051	7.94525	0.33063	40911.8	YDR035W	ARO3	3-deoxy-7-phosphoheptulonate synthase ARO3	ORF	Verified	3-deoxy-D-arabino-heptulosonate-7-phosphate (DAHP) synthase; catalyzes the first step in aromatic amino acid biosynthesis and is feedback-inhibited by phenylalanine or high concentration of tyrosine or tryptophan
YDR036C	0.334	0.285	0.4475	0.355	0.0833562	0.661426	0.001745	4510.81	YDR036C	EHD3	MRP5	ORF	Verified	3-hydroxyisobutyryl-CoA hydrolase; member of a family of enoyl-CoA hydratase/isomerases; non-tagged protein is detected in highly purified mitochondria in high-throughput studies; phosphorylated; mutation affects fluid-phase endocytosis
YDR037W	0.7185	-0.2415	0.3745	0.284	0.48638	6.0303	0.283051	48769.8	YDR037W	KRS1	lysine--tRNA ligase KRS1|GCD5	ORF	Verified	Lysyl-tRNA synthetase
YDR038C	-0.5525	-0.03	0.0725	-0.17	0.335196	11.5985	0.379374	8092.6	YDR038C	ENA5	putative Na(+)-exporting P-type ATPase ENA5	ORF	Verified	Protein with similarity to P-type ATPase sodium pumps; member of the Na+ efflux ATPase family
YDR039C	-3.0365	-2.7025	-2.379	-2.706	0.328764	0.0448982	0.000836	35636.3	YDR039C	ENA2	Na(+)-exporting P-type ATPase ENA2	ORF	Verified	P-type ATPase sodium pump; involved in Na+ efflux to allow salt tolerance; likely not involved in Li+ efflux
YDR040C	-2.867	-2.34	-2.0635	-2.424	0.408206	0.0694727	0.000771	40798.1	YDR040C	ENA1	Na(+)/Li(+)-exporting P-type ATPase ENA1|PMR2|HOR6	ORF	Verified	P-type ATPase sodium pump; involved in Na+ and Li+ efflux to allow salt tolerance
YDR041W	1.13	0.7025	0.698	0.843	0.248126	0.349155	0.002408	6864.56	YDR041W	RSM10	mitochondrial 37S ribosomal protein RSM10	ORF	Verified	Mitochondrial ribosomal protein of the small subunit; has similarity to E. coli S10 ribosomal protein; essential for viability, unlike most other mitoribosomal proteins
YDR042C	0	0	-0.3215	-0.322	0.185618	1.79023	0.766871	355	YDR042C	YDR042C		ORF	Uncharacterized	Putative protein of unknown function; expression is increased in ssu72-ts69 mutant
YDR043C	-3.1855	-1.396	-1.7275	-2.103	0.952012	0.21526	0.008439	9122.51	YDR043C	NRG1	transcriptional regulator NRG1	ORF	Verified	Transcriptional repressor; recruits the Cyc8p-Tup1p complex to promoters; mediates glucose repression and negatively regulates a variety of processes including filamentous growth and alkaline pH response; activated in stochastic pulses of nuclear localization in response to low glucose
YDR044W	0.414	0.1015	0.2415	0.252	0.156531	2.46491	0.02835	3235.49	YDR044W	HEM13	coproporphyrinogen oxidase	ORF	Verified	Coproporphyrinogen III oxidase; oxygen-requiring enzyme that catalyzes sixth step in heme biosynthetic pathway; transcription is repressed by oxygen and heme (via Rox1p and Hap1p); human homolog CPOX can complement yeast mutant and allow growth of haploid null after sporulation of a heterozygous diploid
YDR045C	-0.266	-0.7925	-0.9255	-0.661	0.348767	0.798239	0.017318	1194.73	YDR045C	RPC11	DNA-directed RNA polymerase III core subunit RPC11|C11	ORF	Verified	RNA polymerase III subunit C11; mediates pol III RNA cleavage activity and is important for termination of transcription; homologous to TFIIS
YDR046C	-5.1065	-5.42	-4.769	-5.099	0.325574	0.0125222	0.000105	27988.5	YDR046C	BAP3	amino acid transporter BAP3|PAP1	ORF	Verified	Amino acid permease; involved in uptake of cysteine, leucine, isoleucine and valine; BAP3 has a paralog, BAP2, that arose from the whole genome duplication
YDR047W	0.6695	0.928	0.5485	0.715	0.193857	0.379201	0.001865	1641.52	YDR047W	HEM12	uroporphyrinogen decarboxylase HEM12|HEM6	ORF	Verified	Uroporphyrinogen decarboxylase; catalyzes the fifth step in the heme biosynthetic pathway; localizes to both the cytoplasm and nucleus; a hem12 mutant has phenotypes similar to patients with porphyria cutanea tarda
YDR048C	1.117	0	0.796	0.903	0.575086	0.705274	0.077785	280.667	YDR048C	YDR048C		ORF	Dubious	Dubious open reading frame; unlikely to encode a functional protein, based on available experimental and comparative sequence data; partially overlaps ORF VMS1/YDR049W
YDR049W	0.0565	0.165	0.514	0.245	0.239054	3.98257	0.084393	11268.4	YDR049W	VMS1		ORF	Verified	Component of a Cdc48p-complex involved in protein quality control; exhibits cytosolic and ER-membrane localization, with Cdc48p, during normal growth, and contributes to ER-associated degradation (ERAD) of specific substrates at a step after their ubiquitination; forms a mitochondrially-associated complex with Cdc48p and Npl4p under oxidative stress that is required for ubiquitin-mediated mitocho…
YDR050C	0.3675	-0.0625	-0.228	0.026	0.307384	454.71	0.942053	43582.4	YDR050C	TPI1	triose-phosphate isomerase TPI1	ORF	Verified	Triose phosphate isomerase, abundant glycolytic enzyme; mRNA half-life is regulated by iron availability; transcription is controlled by activators Reb1p, Gcr1p, and Rap1p through binding sites in the 5' non-coding region; inhibition of Tpi1p activity by PEP (phosphoenolpyruvate) stimulates redox metabolism in respiring cells; E104D mutation in human homolog TPI1 causes a rare autosomal disease; …
YDR051C	0.6325	0.328	0.2385	0.4	0.206546	1.29091	0.018896	40359.5	YDR051C	DET1	acid phosphatase DET1	ORF	Verified	Acid phosphatase; involved in the non-vesicular transport of sterols in both directions between the endoplasmic reticulum and plasma membrane; deletion confers sensitivity to nickel
YDR052C	0.6735	0.2135	0.268	0.385	0.25133	1.6956	0.026749	1916.79	YDR052C	DBF4	protein serine/threonine kinase activating protein DBF4|DNA52|LSD7	ORF	Verified	Regulatory subunit of Cdc7p-Dbf4p kinase complex; required for Cdc7p kinase activity and initiation of DNA replication; phosphorylates the Mcm2-7 family of proteins; cell cycle regulated; relative distribution to the nucleus increases upon DNA replication stress; co-expression of human CDC7 and DBF4 complements single cdc7 or dbf4 null mutations or the cdc7 dbf4 double null mutation
YDR053W	0	-0.078	1.751	0.837	1.03419	1.47622	0.629606	280.667	YDR053W	YDR053W		ORF	Dubious	Putative protein of unknown function; open reading frame overlaps 5' end of essential DBF4 gene encoding the regulatory subunit of the Cdc7p-Dbf4p kinase complex
YDR054C	0.099	0.1675	-0.04	0.075	0.105727	18.796	0.258638	4833.97	YDR054C	CDC34	SCF E2 ubiquitin-protein ligase catalytic subunit CDC34|UBC3|DNA6	ORF	Verified	Ubiquitin-conjugating enzyme (E2); catalytic subunit of SCF ubiquitin-protein ligase complex (together with Skp1p, Rbx1p, Cdc53p, and an F-box protein) that regulates cell cycle progression by targeting key substrates for degradation; protein abundance increases in response to DNA replication stress; human CDC34 functionally complements the thermosensitivity of the cdc34-2 mutant
YDR055W	-1.3765	-2.2425	-2.0235	-1.881	0.450283	0.127265	0.00141	54107.6	YDR055W	PST1	HPF2	ORF	Verified	Cell wall protein that contains a putative GPI-attachment site; secreted by regenerating protoplasts; up-regulated by activation of the cell integrity pathway, as mediated by Rlm1p; upregulated by cell wall damage via disruption of FKS1; PST1 has a paralog, ECM33, that arose from the whole genome duplication
YDR056C	-0.093	-0.4435	-0.854	-0.463	0.380894	1.77681	0.050882	2168.1	YDR056C	EMC10		ORF	Uncharacterized	Putative protein of unknown function; subunit of evolutionarily conserved EMC (Endoplasmic Reticulum Membrane Complex) implicated in ERAD (ER-associated degradation) and proper assembly of multi-pass transmembrane (TM) proteins; EMC acts in yeast as an ER-mitochondria tether that interacts with outer membrane protein Tom5p of TOM (Translocase of the Mitochondrial Outer Membrane) complex; YDR056C …
YDR057W	-1.1705	-0.283	-0.1425	-0.532	0.557402	1.96945	0.093796	2361.5	YDR057W	YOS9		ORF	Verified	ER quality-control lectin; integral subunit of the HRD ligase; participates in efficient ER retention of misfolded proteins by recognizing them and delivering them to Hrd1p; binds to glycans with terminal alpha-1,6 linked mannose on misfolded N-glycosylated proteins and participates in targeting proteins to ERAD; member of the OS-9 protein family
YDR058C	-0.149	0.7545	0.3675	0.324	0.453294	4.31807	0.180171	14345.6	YDR058C	TGL2	triglyceride lipase	ORF	Verified	Triacylglycerol lipase that is localized to the mitochondria; has lipolytic activity towards triacylglycerols and diacylglycerols when expressed in E. coli
YDR059C	-0.0885	0.148	-0.1635	-0.035	0.162578	132.717	0.752021	5826.1	YDR059C	UBC5	E2 ubiquitin-conjugating protein UBC5	ORF	Verified	Ubiquitin-conjugating enzyme; mediates selective degradation of short-lived, abnormal, or excess proteins, including histone H3; central component of the cellular stress response; expression is heat inducible; protein abundance increases in response to DNA replication stress; UBC5 has a paralog, UBC4, that arose from the whole genome duplication
YDR060W	0.601	-0.1705	-0.1515	0.093	0.440043	50.878	0.697089	10844.7	YDR060W	MAK21	RNA-binding ribosome biosynthesis protein MAK21|NOC1	ORF	Verified	Constituent of 66S pre-ribosomal particles; required for large (60S) ribosomal subunit biogenesis; acts as part of a Mak21p-Noc2p-Rrp5p module that associates with nascent pre-rRNA during transcription and has a role in bigenesis of the large ribosomal subunit; involved in nuclear export of pre-ribosomes; required for maintenance of dsRNA virus; homolog of human CAATT-binding protein
YDR061W	0.376	0.1015	0.035	0.171	0.180764	6.18186	0.104281	8247.96	YDR061W	YDR061W		ORF	Uncharacterized	Protein with similarity to ABC transporter family members; lacks predicted membrane-spanning regions; transcriptionally activated by Yrm1p along with genes involved in multidrug resistance
YDR062W	-0.6175	-0.3705	-0.694	-0.561	0.169073	0.537215	0.00543	7090.66	YDR062W	LCB2	serine C-palmitoyltransferase LCB2|TSC1|SCS1	ORF	Verified	Component of serine palmitoyltransferase; responsible along with Lcb1p for the first committed step in sphingolipid synthesis, which is the condensation of serine with palmitoyl-CoA to form 3-ketosphinganine
YDR063W	0.199	-0.3	-1.12	-0.407	0.665978	4.02042	0.234615	7252.85	YDR063W	AIM7	GMF1|GMF	ORF	Verified	Protein that interacts with Arp2/3 complex; interacts with Arp2/3 complex to stimulate actin filament debranching and inhibit actin nucleation; has similarity to Cof1p and also to human glia maturation factor (GMF); null mutant displays elevated mitochondrial genome loss
YDR064W	-0.601	-1.091	-0.947	-0.879	0.251844	0.325952	0.002506	31952.9	YDR064W	RPS13	uS15|ribosomal 40S subunit protein S13|YS15|S27a|S15|S13|RPS13C|RPS13B	ORF	Verified	Protein component of the small (40S) ribosomal subunit; homologous to mammalian ribosomal protein S13 and bacterial S15
YDR065W	0.116	-0.232	-0.5545	-0.224	0.335331	6.68309	0.333813	515.061	YDR065W	RRG1		ORF	Verified	Protein of unknown function; required for vacuolar acidification and mitochondrial genome maintenance; the authentic, non-tagged protein is detected in highly purified mitochondria in high-throughput studies
YDR066C	0.7855	0.408	0.091	0.428	0.347689	1.89803	0.082919	2217.72	YDR066C	RTR2	putative protein-serine/threonine phosphatase	ORF	Verified	Protein of unknown function; exhibits genetic interactions with Rtr1p; green fluorescent protein (GFP)-fusion protein localizes to the cytoplasm; YDR066C is not an essential gene; relocalizes from nucleus to cytoplasmic foci upon DNA replication stress; RTR2 has a paralog, RTR1, that arose from the whole genome duplication
YDR067C	0.396	-0.029	-0.715	-0.116	0.560586	41.6607	0.735354	3309.1	YDR067C	OCA6	protein-tyrosine-phosphatase	ORF	Uncharacterized	Cytoplasmic protein required for replication of Brome mosaic virus; S. cerevisiae is a model system for studying positive-strand RNA virus replication; null mutation confers sensitivity to tunicamycin and DTT
YDR068W	-0.0775	-0.1825	-0.1285	-0.13	0.0525071	3.10693	0.008634	30708.2	YDR068W	DOS2		ORF	Verified	Protein of unknown function; green fluorescent protein (GFP)-fusion protein localizes to the cytoplasm
YDR069C	-1.101	-0.489	-0.988	-0.859	0.325657	0.441341	0.005926	7605.37	YDR069C	DOA4	ubiquitin-specific protease DOA4|UBP4|SSV7|NPI2|MUT4|DOS1	ORF	Verified	Ubiquitin hydrolase; deubiquitinates intralumenal vesicle (ILVs) cargo proteins; required for recycling ubiquitin from proteasome-bound ubiquitinated intermediates, acts at the late endosome/prevacuolar compartment to recover ubiquitin from ubiquitinated membrane proteins destined for the vacuole; DOA4 has a paralog, UBP5, that arose from the whole genome duplication
YDR070C	-1.9825	-1.216	-1.7265	-1.642	0.390228	0.144735	0.00136	22617.3	YDR070C	FMP16		ORF	Verified	Protein of unknown function; may be involved in responding to conditions of stress; the authentic, non-tagged protein is detected in highly purified mitochondria in high-throughput studies; protein abundance increases in response to DNA replication stress
YDR071C	0.604	0.5175	0.1355	0.419	0.249299	1.42001	0.026962	14719.7	YDR071C	PAA1	polyamine acetyltransferase	ORF	Verified	Polyamine acetyltransferase; acetylates polyamines (e.g. putrescine, spermidine, spermine) and also aralkylamines (e.g. tryptamine, phenylethylamine); may be involved in transcription and/or DNA replication
YDR072C	0.056	0.46	0.0545	0.19	0.233684	6.47323	0.141336	35053.7	YDR072C	IPT1	MIC2|inositolphosphotransferase|KTI6|SYR4	ORF	Verified	Inositolphosphotransferase; involved in synthesis of mannose-(inositol-P)2-ceramide (M(IP)2C), the most abundant sphingolipid; can mutate to resistance to the antifungals syringomycin E and DmAMP1 and to K. lactis zymocin
YDR073W	-1.39	-0.502	-0.779	-0.89	0.454348	0.5736	0.014483	5741.85	YDR073W	SNF11		ORF	Verified	Subunit of the SWI/SNF chromatin remodeling complex; involved in transcriptional regulation; interacts with a highly conserved 40-residue sequence of Snf2p; relocates to the cytosol under hypoxic conditions
YDR074W	-1.422	-0.848	-0.974	-1.081	0.301678	0.258162	0.002016	41142.8	YDR074W	TPS2	trehalose-phosphatase TPS2|PFK3|HOG2	ORF	Verified	Phosphatase subunit of the trehalose-6-P synthase/phosphatase complex; involved in synthesis of the storage carbohydrate trehalose; expression is induced by stress conditions and repressed by the Ras-cAMP pathway; protein abundance increases in response to DNA replication stress
YDR075W	-0.0265	0.5175	0.797	0.429	0.41877	2.27542	0.081799	4218.68	YDR075W	PPH3	phosphoprotein phosphatase PP4 catalytic subunit PPH3	ORF	Verified	Catalytic subunit of protein phosphatase PP4 complex; Pph3p and Psy2p form active complex, Psy4p may provide substrate specificity; regulates recovery from the DNA damage checkpoint, the gene conversion- and single-strand annealing-mediated pathways of meiotic double-strand break repair and efficient Non-Homologous End-Joining (NHEJ) pathway; involved in activation of Gln3p to alleviate nitrogen …
YDR076W	0.5745	0.553	0.87	0.666	0.17714	0.399363	0.003597	767.838	YDR076W	RAD55	putative DNA-dependent ATPase RAD55	ORF	Verified	Protein that stimulates strand exchange; stimulates strand exchange by stabilizing the binding of Rad51p to single-stranded DNA; involved in the recombinational repair of double-strand breaks in DNA during vegetative growth and meiosis; forms heterodimer with Rad57p
YDR077W	-2.012	-2.5515	-2.4525	-2.339	0.2872	0.0524956	0.002255	43439.5	YDR077W	SED1		ORF	Verified	Major stress-induced structural GPI-cell wall glycoprotein; associates with translating ribosomes, possible role in mitochondrial genome maintenance; ORF contains two distinct variable minisatellites; SED1 has a paralog, SPI1, that arose from the whole genome duplication
YDR078C	0.688	0.7725	0.052	0.504	0.39386	1.55053	0.052169	2400.94	YDR078C	SHU2		ORF	Verified	Component of Shu complex (aka PCSS complex); Shu complex also includes Psy3, Csm2, Shu1, and promotes error-free DNA repair, Shu complex mediates inhibition of Srs2p function; promotes formation of Rad51p filaments; important for both mitotic and meiotic homologous recombination, and contains a conserved SWIM domain that is necessary for both
YDR079C-A	0.6365	0.1465	-0.395	0.129	0.515964	31.0056	0.645102	2884.72	YDR079C-A	TFB5	TFIIH complex subunit TFB5	ORF	Verified	Component of RNA polymerase II general transcription factor TFIIH; involved in transcription initiation and in nucleotide-excision repair; relocalizes to the cytosol in response to hypoxia; homolog of Chlamydomonas reinhardtii REX1-S protein involved in DNA repair
YDR079W	-0.1075	0.112	-0.5135	-0.17	0.31735	10.981	0.341365	2525.13	YDR079W	PET100		ORF	Verified	Chaperone that facilitates the assembly of cytochrome c oxidase; integral to the mitochondrial inner membrane; interacts with a subcomplex of subunits VII, VIIa, and VIII (Cox7p, Cox9p, and Cox8p) but not with the holoenzyme
YDR080W	-0.4585	-0.813	-0.3755	-0.549	0.232367	0.770955	0.007148	907.838	YDR080W	VPS41	VPL20|VAM2|SVL2|FET2|CVT8	ORF	Verified	Subunit of the HOPS endocytic tethering complex; vacuole membrane protein that functions as a Rab GTPase effector, interacting specifically with the GTP-bound conformation of Ypt7p, facilitating tethering, docking and promoting membrane fusion events at the late endosome and vacuole; required for both membrane and protein trafficking; Yck3p-mediated phosphorylation regulates the organization of v…
YDR081C	-0.328	-0.417	-0.2425	-0.329	0.0872558	0.806126	0.00525	15160.2	YDR081C	PDC2		ORF	Verified	Transcription factor for thiamine-regulated genes; required for expression of the two isoforms of pyruvate decarboxylase (PDC1 and PDC5) along with thiamine biosynthetic genes; binds a DNA sequence in the PDC5 promoter; mutant fails to grow on 2% glucose and thus is scored as inviable under standard conditions
YDR082W	-0.9575	-0.7825	-0.698	-0.813	0.132354	0.200242	0.00092	2238.87	YDR082W	STN1		ORF	Verified	Telomere end-binding and capping protein; plays a key role with Pol12p in linking telomerase action with completion of lagging strand synthesis, and in a regulatory step required for telomere capping; similar to human Stn1
YDR083W	-0.692	-0.7955	-0.307	-0.598	0.257413	0.719828	0.008649	1810.46	YDR083W	RRP8	25S rRNA (adenine645-N1)-methyltransferase	ORF	Verified	Nucleolar S-adenosylmethionine-dependent rRNA methyltransferase; methylates adenine (m1A) of the large subunit (LSU) rRNA at position 645; involved in pre-rRNA cleavage at site A2; mutation is synthetically lethal with a gar1 mutation; deletion disrupts telomere maintenance by influencing the expression of neighboring gene STN1
YDR084C	0.4465	0.4335	-0.1195	0.254	0.323093	5.00795	0.194384	4422.29	YDR084C	TVP23		ORF	Verified	Integral membrane protein; localized to late Golgi vesicles along with the v-SNARE Tlg2p; green fluorescent protein (GFP)-fusion protein localizes to the cytoplasm in a punctate pattern
YDR085C	-0.4885	-0.3165	-0.3235	-0.376	0.0973465	0.688564	0.00291	42707.1	YDR085C	AFR1		ORF	Verified	Protein required for pheromone-induced projection (shmoo) formation; regulates septin architecture during mating; has an RVXF motif that mediates targeting of Glc7p to mating projections; interacts with Cdc12p; AFR1 has a paralog, YER158C, that arose from the whole genome duplication
YDR086C	0.3585	-0.0885	-0.5615	-0.097	0.460061	48.8959	0.768593	11856.7	YDR086C	SSS1	translocon subunit SSS1	ORF	Verified	Subunit of the Sec61p translocation complex (Sec61p-Sss1p-Sbh1p); this complex forms a channel for passage of secretory proteins through the endoplasmic reticulum membrane, and of the Ssh1p complex (Ssh1p-Sbh2p-Sss1p); interacts with Ost4p and Wbp1p
YDR087C	0.125	-0.5755	-0.448	-0.299	0.373114	4.17349	0.145046	17534.4	YDR087C	RRP1		ORF	Verified	Essential evolutionarily conserved nucleolar protein; necessary for biogenesis of 60S ribosomal subunits and for processing of pre-rRNAs to mature rRNA; associated with several distinct 66S pre-ribosomal particles
YDR088C	0.838	0.4345	0.692	0.655	0.204301	0.476199	0.003085	14688.4	YDR088C	SLU7	mRNA splicing protein SLU7|SLT17	ORF	Verified	RNA splicing factor; required for ATP-independent portion of 2nd catalytic step of spliceosomal RNA splicing; interacts with Prp18p; contains zinc knuckle domain
YDR089W	-0.007	0.39	0.2325	0.205	0.199906	4.75685	0.079734	12953.5	YDR089W	VTC5		ORF	Verified	Novel subunit of the vacuolar transporter chaperone complex; vacuolar transmembrane protein that regulates biosynthesis of polyphosphate; deletion reduces and overexpression increases polyP accumulation; SPX domain (Syg1, Pho81, Xpr1)-containing protein involved in phosphate homeostasis; relocalizes from vacuole to cytoplasm upon DNA replication stress
YDR090C	0.944	0.3625	0.7465	0.684	0.295693	0.632016	0.011956	2699.57	YDR090C	YDR090C		ORF	Uncharacterized	Putative protein of unknown function
YDR091C	-0.542	-0.549	-0.4555	-0.515	0.0520793	0.196359	0.002567	1979.62	YDR091C	RLI1	Fe-S cluster-binding ribosome biosynthesis protein	ORF	Verified	Essential Fe-S protein; required for ribosome biogenesis, translation initiation/termination; facilitates binding of multifactor complex (MFC) of initiation factors to small ribosomal subunit; Dom34-Hbs1 complex and Rli1p work in dissociating inactive ribosomes, thereby facilitating translation restart; forms complex with Lto1p and Yae1p; dependency on ROS-labile FeS clusters, activity in nuclear…
YDR092W	0.446	-0.347	-0.6365	-0.179	0.560426	17.4909	0.549398	5963.07	YDR092W	UBC13	E2 ubiquitin-conjugating protein UBC13	ORF	Verified	E2 ubiquitin-conjugating enzyme; involved in the error-free DNA postreplication repair pathway; interacts with Mms2p to assemble ubiquitin chains at the Ub Lys-63 residue; DNA damage triggers redistribution from the cytoplasm to the nucleus
YDR093W	-2.1875	-0.7	-0.8195	-1.235	0.826474	0.541871	0.029883	5926.23	YDR093W	DNF2	aminophospholipid-translocating P4-type ATPase DNF2	ORF	Verified	Aminophospholipid translocase (flippase); type 4 P-type ATPase; involved in phospholipid translocation, contributing to endocytosis, protein transport, and cellular polarization; localizes primarily to the plasma membrane; localizes to the shmoo tip where it has a redundant role in the cellular response to mating pheromone; DNF2 has a paralog, DNF1, that arose from the whole genome duplication
YDR094W	-1.444	-0.5025	0.0225	-0.642	0.743042	1.80278	0.127499	36773.1	YDR094W	YDR094W		ORF	Dubious	Dubious open reading frame; unlikely to encode a functional protein, based on available experimental and comparative sequence data; partially overlaps verified ORF DNF2/YDR093W
YDR095C	0	0	0	0	0	0	1	293.786	YDR095C	YDR095C		ORF	Dubious	Dubious open reading frame; unlikely to encode a functional protein, based on available experimental and comparative sequence data
YDR096W	-1.498	-0.432	-0.6685	-0.866	0.559815	0.746464	0.024275	29488.5	YDR096W	GIS1	histone demethylase GIS1	ORF	Verified	Histone demethylase and transcription factor; regulates genes during nutrient limitation; activity modulated by proteasome-mediated proteolysis; has JmjC and JmjN domain in N-terminus that interact, promoting stability and proper transcriptional activity; contains two transactivating domains downstream of Jmj domains and a C-terminal DNA binding domain; relocalizes to the cytosol in response to h…
YDR097C	0.577	0.8105	1.0095	0.799	0.216479	0.339096	0.002294	7697.16	YDR097C	MSH6	PMS6|mismatch repair ATPase MSH6|PMS3	ORF	Verified	Protein required for mismatch repair in mitosis and meiosis; forms a complex with Msh2p to repair both single-base & insertion-deletion mispairs; also involved in interstrand cross-link repair; potentially phosphorylated by Cdc28p
YDR098C	0.0915	-0.047	-0.0005	0.015	0.0704846	313.265	0.783647	32674	YDR098C	GRX3	monothiol glutaredoxin GRX3	ORF	Verified	Glutathione-dependent oxidoreductase; hydroperoxide and superoxide-radical responsive; monothiol glutaredoxin subfamily member along with Grx4p and Grx5p; protects cells from oxidative damage; with Grx4p, binds to Aft1p in iron-replete conditions, promoting its dissociation from promoters; evidence exists indicating that the translation start site is not Met1 as currently annotated, but rather Me…
YDR099W	-0.158	0.0815	0.0975	0.007	0.143118	2920.77	0.94517	57893.7	YDR099W	BMH2	14-3-3 family protein BMH2|SCD3	ORF	Verified	14-3-3 protein, minor isoform; controls proteome at post-transcriptional level, binds proteins and DNA, involved in regulation of many processes including exocytosis, vesicle transport, Ras/MAPK signaling, and rapamycin-sensitive signaling; protein increases in abundance and relative distribution to the nucleus increases upon DNA replication stress; abundance relative to Bmh1p increases during sp…
YDR100W	-0.0245	0.2365	-0.1635	0.016	0.203077	793.27	0.902062	9014.24	YDR100W	TVP15		ORF	Verified	Integral membrane protein; localized to late Golgi vesicles along with the v-SNARE Tlg2p
YDR101C	-0.0625	-0.1635	0.321	0.032	0.255608	249.617	0.844054	16455.9	YDR101C	ARX1	putative hydrolase	ORF	Verified	Nuclear export factor for the ribosomal pre-60S subunit; shuttling factor which directly binds FG rich nucleoporins and facilities translocation through the nuclear pore complex; interacts directly with Alb1p; responsible for Tif6p recycling defects in the absence of Rei1; associated with the ribosomal export complex
YDR102C	0	0	0.318	0.318	0.183597	1.81557	1	469.5	YDR102C	YDR102C		ORF	Uncharacterized	Putative protein of unknown function; conserved among S. cerevisiae strains; YDR102C is not an essential gene; homozygous diploid deletion strain exhibits high budding index
YDR103W	-0.3495	-0.0685	0.0665	-0.117	0.212227	15.5035	0.281945	8453.31	YDR103W	STE5	NUL3|HMD3	ORF	Verified	Pheromone-responsive MAPK scaffold protein; couples activation of the G-protein-coupled pheromone receptor to MAPK activation; intramolecular interaction of PH and VWA domains blocks activation of assembled signaling cascade components (Ste11p, Ste7p and Fus3p) under basal conditions; Gbeta-gamma (Ste4p-Ste18p)-dependent docking at the plasma membrane and binding of PI(4,5)P2 by the PH domain rel…
YDR104C	-0.1675	-0.394	-0.1855	-0.249	0.125896	2.03054	0.028889	8825.15	YDR104C	SPO71		ORF	Verified	Meiosis-specific protein required for prospore membrane morphogenesis; localizes to the prospore membrane (PSM) during sporulation; required for PSM elongation and closure; genetically antagonistic to SPO1; recruits Vps13p to the PSM during sporulation; interacts and functions cooperatively with Spo73p; mutants have defects in the PSM, aberrant spore wall formation and reduced PtdIns-phosphate po…
YDR105C	-0.275	-0.118	-0.3995	-0.264	0.141062	2.02397	0.071944	11014.6	YDR105C	TMS1		ORF	Verified	Vacuolar membrane protein of unknown function; is conserved in mammals; predicted to contain eleven transmembrane helices; interacts with Pdr5p, a protein involved in multidrug resistance
YDR106W	0.263	1.1245	0.3325	0.573	0.478588	1.45765	0.125481	425.453	YDR106W	ARP10		ORF	Verified	Component of the dynactin complex; localized to the pointed end of the Arp1p filament; may regulate membrane association of the complex
YDR107C	-1.919	-0.5595	-0.4885	-0.989	0.806186	0.824219	0.048489	3916.19	YDR107C	TMN2		ORF	Verified	Protein with a role in cellular adhesion and filamentous growth; similar to Tmn3p; member of the evolutionarily conserved Transmembrane Nine family of proteins with nine membrane-spanning segments; TMN2 has a paralog, EMP70, that arose from the whole genome duplication
YDR108W	0.178	0.0545	0.1595	0.131	0.0666077	3.88134	0.190751	8033.35	YDR108W	TRS85	GSG1|MUM1	ORF	Verified	Component of transport protein particle (TRAPP) complex III; TRAPPIII is a multimeric guanine nucleotide-exchange factor for the GTPase Ypt1p, regulating endosome-Golgi traffic and required for membrane expansion during autophagy and the CVT pathway; directs Ypt1p to the PAS; late post-replication meiotic role
YDR109C	0.1505	-0.1735	-0.031	-0.018	0.162391	501.206	0.861914	1543.69	YDR109C	YDR109C	putative phosphotransferase	ORF	Uncharacterized	Putative kinase
YDR110W	-0.1785	-0.1225	0.0455	-0.085	0.116573	16.1347	0.291169	1636.34	YDR110W	FOB1	replication fork barrier binding protein FOB1|HRM1	ORF	Verified	Nucleolar protein that binds the rDNA replication fork barrier site; required for replication fork blocking, recombinational hotspot activity, condensin recruitment to replication fork barrier (RFB), and rDNA repeat segregation; related to retroviral integrases
YDR111C	-0.2775	0.451	-0.1595	0.005	0.391013	15640.5	1	8139.03	YDR111C	ALT2	alanine transaminase ALT2	ORF	Uncharacterized	Catalytically inactive alanine transaminase; expression is repressed in the presence of alanine and repression is mediated by Nrg1p; ALT2 has a paralog, ALT1, that arose from the whole genome duplication
YDR112W	0	0	0.1295	0.13	0.0747669	4.42407	0.858611	342.692	YDR112W	IRC2		ORF	Dubious	Dubious open reading frame; unlikely to encode a functional protein, based on available experimental and comparative sequence data; partially overlaps ALT2/YDR111C; null mutant displays increased levels of spontaneous Rad52p foci
YDR113C	1.6305	1.1745	1.145	1.317	0.272188	0.156927	0.00318	2617.54	YDR113C	PDS1	securin	ORF	Verified	Securin; inhibits anaphase by binding separin Esp1p; blocks cyclin destruction and mitotic exit, essential for meiotic progression and mitotic cell cycle arrest; localization is cell-cycle dependent and regulated by Cdc28p phosphorylation
YDR114C	0.624	1.192	-0.1545	0.377	0.675987	4.75615	0.433414	270.75	YDR114C	YDR114C		ORF	Uncharacterized	Putative protein of unknown function; deletion mutant exhibits poor growth at elevated pH and calcium
YDR115W	0.0175	0.441	-0.202	0.085	0.326849	45.2386	0.609815	9517.15	YDR115W	MRX14	putative mitochondrial 54S ribosomal protein	ORF	Verified	Putative mitochondrial ribosomal protein of the large subunit; similar to E. coli L34 ribosomal protein; required for respiratory growth, as are most mitochondrial ribosomal proteins; protein increases in abundance and relocalizes to the plasma membrane upon DNA replication stress
YDR116C	0.319	0.8385	0.575	0.578	0.259759	0.777526	0.016166	36645	YDR116C	MRPL1	mitochondrial 54S ribosomal protein MRPL1	ORF	Verified	Mitochondrial ribosomal protein of the large subunit
YDR117C	0.1705	-0.064	-0.0305	0.026	0.126829	187.617	0.71757	5688.31	YDR117C	TMA64	RBF64	ORF	Verified	Protein of unknown function that associates with ribosomes; has a putative RNA binding domain; in mammals the corresponding protein, eIF2D, has been shown to possess translation initiation factor activity
YDR118W	-0.1295	0.29	0.1665	0.109	0.21558	18.1449	0.369827	3822.15	YDR118W	APC4	anaphase promoting complex subunit 4	ORF	Verified	Subunit of the Anaphase-Promoting Complex/Cyclosome (APC/C); APC/C is a ubiquitin-protein ligase required for degradation of anaphase inhibitors, including mitotic cyclins, during the metaphase/anaphase transition; component of the platform domain of the APC/C, based on structural analysis; relative distribution to the nucleus increases upon DNA replication stress
YDR119W	-0.8555	0.311	0.4225	-0.041	0.707865	421.098	0.932692	7760.02	YDR119W	VBA4		ORF	Uncharacterized	Protein of unknown function; proposed role as a basic amino acid permease based on phylogeny; GFP-fusion protein localizes to vacuolar membrane; physical interaction with Atg27p suggests a possible role in autophagy; non-essential gene
YDR120C	0.0665	-0.057	0.3905	0.133	0.231115	13.0655	0.406909	591.697	YDR120C	TRM1	tRNA (guanine26-N2)-dimethyltransferase	ORF	Verified	tRNA methyltransferase; two forms of protein are made by alternative translation starts; localizes to both nucleus and mitochondrion to produce modified base N2,N2-dimethylguanosine in tRNAs in both compartments; nuclear Trm1p is evenly distributed around inner nuclear membrane in WT, but mislocalizes as puncta near ER-nucleus junctions in spindle pole body (SPB) mutants; both Trm1p inner nuclear…
YDR121W	0.7905	-0.011	0.068	0.283	0.441711	5.51525	0.218558	3920.19	YDR121W	DPB4	DNA polymerase epsilon noncatalytic subunit	ORF	Verified	Subunit of DNA pol epsilon and of ISW2 chromatin accessibility complex; involved in both chromosomal DNA replication and inheritance of telomeric silencing; stabilizes the interaction of Pol epsilon with primer-template DNA, positively affecting the processivity of the polymerase and exonuclease activities of Pol epsilon; interacts with extranucleosomal DNA and acts as anchor point for ISW2 compl…
YDR122W	-0.279	-0.007	-0.0345	-0.107	0.149733	13.0783	0.265149	13062	YDR122W	KIN1	serine/threonine protein kinase KIN1	ORF	Verified	Serine/threonine protein kinase involved in regulation of exocytosis; localizes to the cytoplasmic face of the plasma membrane; KIN1 has a paralog, KIN2, that arose from the whole genome duplication
YDR123C	1.451	1.457	1.768	1.559	0.181313	0.0745996	0.000448	2027.31	YDR123C	INO2	SCS1|DIE1	ORF	Verified	Transcription factor; component of the heteromeric Ino2p/Ino4p basic helix-loop-helix transcription activator that binds inositol/choline-responsive elements (ICREs), required for derepression of phospholipid biosynthetic genes in response to inositol depletion; involved in diauxic shift
YDR124W	0.426	0.849	0.86	0.712	0.247456	0.488132	0.003748	2658.01	YDR124W	YDR124W		ORF	Uncharacterized	Putative protein of unknown function; non-essential gene; expression is strongly induced by alpha factor
YDR125C	-0.877	0.179	0.092	-0.202	0.586183	14.3658	0.491479	889.412	YDR125C	ECM18	alpha/beta hydrolase family protein	ORF	Verified	Protein of unknown function; ECM18 has a paralog, ICT1, that arose from the whole genome duplication
YDR126W	-0.379	-0.084	-0.1085	-0.153	0.163705	6.99324	0.344381	529.173	YDR126W	SWF1	palmitoyltransferase SWF1|PSL10	ORF	Verified	Palmitoyltransferase that acts on transmembrane proteins; including the SNAREs Snc1p, Syn8p, Tlg1p and likely all SNAREs; contains an Asp-His-His-Cys-cysteine rich (DHHC-CRD) domain; may have a role in vacuole fusion
YDR127W	-0.5255	-0.1835	-0.0185	-0.242	0.258598	4.41565	0.103227	33338.6	YDR127W	ARO1	pentafunctional protein ARO1p	ORF	Verified	Pentafunctional arom protein; catalyzes steps 2 through 6 in the biosynthesis of chorismate, which is a precursor to aromatic amino acids
YDR128W	0.236	0.315	0.3495	0.3	0.0581858	0.646509	0.001658	33692.5	YDR128W	MTC5	SEA3	ORF	Verified	Subunit of SEACAT, a subcomplex of the SEA complex; Mtc1p, along with Rtc1p and Sea4p, redundantly inhibit the TORC1 inhibitory role of the Iml1p/SEACIT (Iml1p-Npr2p-Npr3p) subcomplex, a GAP for GTPase Gtr1p (EGOC subunit) in response to amino acid limitation, thereby resulting in activation of TORC1 signaling; SEA is a coatomer-related complex that associates dynamically with the vacuole; relati…
YDR129C	-0.145	0.201	0.1105	0.056	0.179437	57.2185	0.820659	46555.5	YDR129C	SAC6	fimbrin|ABP67	ORF	Verified	Fimbrin, actin-bundling protein; cooperates with Scp1p in organization and maintenance of the actin cytoskeleton; phosphorylated by Cdc28p/Clb2p in metaphase on T103, to regulate conformation, and modulate actin filament binding affinity and actin cable dynamics; relocalizes from the plasma membrane to the cytoplasm upon DNA replication stress; human homologs PLS3 and LCP1 implicated in spinocere…
[truncated: 5,138 more rows]

## Sheet: Genes expressed uniformly
id	Rep-1	Rep-2	Rep-3	Mean	SD	SD/ Mean²	p-value	ORF	Name	Alias	Feature type	Feature qualifier	Description
[truncated: 454 more rows]

## Sheet: Genes expressed differently
id	Rep-1	Rep-2	Rep-3	Mean	Rep-1 vs 2,3	Rep-2 vs 1,3	Rep-3 vs 1,2	SD	SD/Mean²	p-value	Mean fluorescence	ORF	Name	Alias	Feature type	Feature qualifier	Description
[truncated: 467 more rows]

## Sheet: Legend
Description of the contents of some columns on tab: Genes expressed differently
[truncated: 8 more rows]
